# Supplementary material for: Metabolome-based prediction of yield heterosis contributes to the breeding of elite rice
Source: Life Sci Alliance. 2019 Dec 13;3(1):e201900551. doi: 10.26508/lsa.201900551 (PMC6918511; doi:10.26508/lsa.201900551)
Supplement: Supplementary file 4 [file LSA-2019-00551_TableS4.xls]

## Sheet: Sheet2
Table S4 Correlations between hybrid metabolite levels and corresponding transformed parental metabolite levels.
		Mean	Difference	Ratio
Mianhui725/Balilla	Pearson Correlation	-0.039*	0.200**	0.00171471
	Sig. (2-tailed)	0.017808	4.26577e-35	0.916445
	N	3746	3746	3746
Balilla/Mianhui725	Pearson Correlation	0.287**	-0.104**	-0.0012602
	Sig. (2-tailed)	4.97144e-72	1.79651e-10	0.938541
	N	3746	3746	3746
Qianlijing/Balilla	Pearson Correlation	0.00361423	-0.187**	0.0145172
	Sig. (2-tailed)	0.824988	8.4063e-31	0.374395
	N	3746	3746	3746
Balilla/Qianlijing	Pearson Correlation	0.087**	-0.215**	0.0134048
	Sig. (2-tailed)	1.00231e-07	1.83989e-40	0.412102
	N	3746	3746	3746
YB/Balilla	Pearson Correlation	-0.067**	-0.149**	-0.0081021
	Sig. (2-tailed)	4.01069e-05	5.50898e-20	0.620086
	N	3746	3746	3746
Balilla/YB	Pearson Correlation	-0.128**	-0.144**	-0.034*
	Sig. (2-tailed)	4.6101e-15	7.72632e-19	0.0374118
	N	3746	3746	3746
*. Correlation is significant at the 0.05 level (2-tailed). **. Correlation is significant at the 0.01 level (2-tailed).
