# Supplementary material for: Metabolome-based prediction of yield heterosis contributes to the breeding of elite rice
Source: Life Sci Alliance. 2019 Dec 13;3(1):e201900551. doi: 10.26508/lsa.201900551 (PMC6918511; doi:10.26508/lsa.201900551)
Supplement: Supplementary file 5 [file LSA-2019-00551_TableS5.xls]

## Sheet: Supplementary Table 5 plsda_vip
Table S5 VIP values of components in PLS-DA of 72 high- and 72 low-BPH-YPP hybrids.
Name	Component 1	Component 2	Component 3	Component 4	Component 5
Xylitol	0.6451	0.58359	0.58269	0.59063	0.59594
Vanillic acid	1.1883	1.0636	1.0444	1.0343	1.0319
Urocanic acid	1.3975	1.2482	1.2256	1.2148	1.2114
Uracil	1.1593	1.0355	1.0265	1.046	1.0436
Traumatic Acid	0.30639	0.48157	0.47491	0.47683	0.47994
Thiamine monophosphate	0.63901	0.67886	0.66854	0.69685	0.71073
Cholesteryl sulfate	3.5078	3.6598	3.5937	3.561	3.5506
Shikimate	0.26726	0.23927	0.57922	0.59026	0.5947
Salicylic acid	1.5819	1.4127	1.3892	1.3848	1.3841
Pyruvaldehyde	0.51419	0.5109	0.53956	0.5345	0.53324
Pyridoxine	0.59218	0.54089	0.55064	0.55666	0.55513
Pyridoxal (Vitamin B6)	0.36201	0.85034	0.84533	0.83767	0.83753
PI(22:5/16:0)	0.4832	0.56108	0.55439	0.55252	0.55261
PI(18:3/18:3)	0.79391	0.8366	0.85058	0.84437	0.84428
PI(18:1/18:2)	0.58961	0.60854	0.62775	0.62327	0.62203
PI(16:0/18:3)	0.10441	0.60619	0.61636	0.63715	0.63583
PI(16:0/18:2)	1.6367	1.5579	1.531	1.5269	1.5233
PG(8:0/16:0)	0.18702	0.23317	0.27583	0.40039	0.40012
PG(20:5/18:3)	0.82275	0.73644	0.72316	0.74021	0.74282
PG(20:5/18:2)	2.8305	2.6624	2.6159	2.6035	2.5959
PG(20:2/16:0)	0.6157	0.79765	0.79658	0.78885	0.78845
PG(18:4/18:3)	0.81104	1.1484	1.1278	1.1215	1.1186
PG(18:4/15:0)	1.7324	1.5748	1.5551	1.5406	1.5365
PG(18:3/18:3)	0.89711	1.3129	1.2968	1.2883	1.2853
LPG(18:3/0:0)	0.33135	0.6823	0.67298	0.66891	0.66741
LPG(18:2/0:0)	0.56819	0.54257	0.53352	0.52844	0.52954
LPG(18:1/0:0)	1.563	1.5222	1.4999	1.5007	1.4971
LPG(18:0/0:0)	3.2344	3.2549	3.196	3.1775	3.1686
LPG(17:0/0:0)	2.7618	2.5155	2.4704	2.4472	2.4424
PG(16:1/18:3)	0.38412	0.4662	0.45778	0.45328	0.45565
PG(16:1/18:1)	1.1095	0.99112	0.98353	0.99532	0.99313
PG(16:1/16:0)	1.2585	1.1413	1.1261	1.1283	1.1258
PG(16:1/15:1)	0.10907	0.25853	0.25442	0.27671	0.28142
PG(16:0/18:3)	0.36325	0.57097	0.57671	0.57119	0.56956
PG(16:0/16:0)	0.42847	0.50738	0.49858	0.49405	0.50137
LPG(16:0/0:0)	0.4428	0.65448	0.68761	0.68087	0.68454
LPG(15:0/0:0)	0.63162	0.69282	0.68386	0.67819	0.67839
PG(14:0/18:3)	0.59227	0.70871	0.69833	0.69689	0.69593
LPG(14:0/0:0)	1.1307	1.1235	1.1045	1.1083	1.1057
PG(10:0/16:0)	1.897	1.7161	1.6885	1.6719	1.6674
PE(22:6/18:3)	0.66832	0.78479	0.88088	0.91018	0.90888
PE(18:3/18:2)	1.9997	1.7878	1.8003	1.8136	1.8082
LPE(18:3/0:0)	0.89992	1.0762	1.0568	1.0571	1.0582
LPE(18:2/0:0)	0.28684	0.94546	0.92913	0.92473	0.92491
LPE(16:0/0:0)	1.8639	2.0507	2.0173	1.9985	1.9931
Pantetheine	0.036243	0.14339	0.28826	0.30271	0.30483
Palmitic acid	2.2876	2.2846	2.2437	2.2219	2.216
LPA(20:0/0:0)	0.89282	0.82105	0.89549	0.89544	0.92066
LPA(18:4/0:0)	0.92524	0.87099	0.88067	0.87204	0.86956
PA(18:3/8:0)	0.18376	0.16524	0.16226	0.16189	0.16151
PA(18:3/18:3)	1.4129	1.3206	1.3015	1.2911	1.2904
LPA(18:3/0:0)	0.84243	0.77993	0.77086	0.76341	0.76176
PA(18:2/22:5)	0.94954	0.91164	0.89522	0.88642	0.89633
PA(18:2/18:3)	3.155	2.9551	2.9028	2.8792	2.8728
PA(18:2/18:2)	0.28089	0.39619	0.41063	0.42817	0.43033
LPA(18:2/0:0)	0.32409	0.28953	0.32196	0.32238	0.32181
LPA(18:0/0:0)	1.1687	1.1762	1.1749	1.1711	1.1719
LPA(17:2/0:0)	0.36438	0.43415	0.44314	0.4396	0.4385
LPA(17:1/0:0)	0.68141	0.60859	0.63743	0.64262	0.64085
LPA(17:0/0:0)	2.392	2.5794	2.5325	2.5125	2.5055
LPA(16:1/0:0)	1.6154	1.6508	1.6218	1.6074	1.6026
PA(16:0/22:6)	1.0232	1.0902	1.0709	1.0636	1.0635
PA(16:0/22:5)	0.83852	0.81018	0.79792	0.79326	0.79506
PA(16:0/18:3)	0.84	0.92832	0.91246	0.90607	0.90935
PA(16:0/18:2)	0.38832	0.36801	0.36151	0.36026	0.36363
LPA(16:0/0:0)	1.9935	1.9424	1.9085	1.8929	1.8896
LPA(15:0/0:0)	2.6468	2.8084	2.7575	2.7345	2.7279
PA(14:0/18:2)	0.8011	0.71712	0.7506	0.7434	0.74254
Oxypurinol	0.21132	0.19075	0.19976	0.19926	0.19896
Myristic acid	1.2604	1.1541	1.1435	1.1334	1.135
Mevalonic acid	0.86149	0.84532	0.95716	0.96808	0.96773
Maleic acid	0.43391	0.42669	0.46965	0.46625	0.46488
L-Tyrosine	0.30395	0.27436	0.3486	0.35624	0.35568
L-Tryptophan	1.7601	1.6075	1.5958	1.5954	1.5912
L-Threonine	0.64875	0.57937	0.61538	0.6134	0.6116
LPS(18:3/0:0)	0.82427	0.76177	0.78757	0.78221	0.78258
LPS(18:2/0:0)	0.10043	0.39815	0.44826	0.45322	0.46062
LPS(18:1/0:0)	0.90623	0.98976	1.0046	1.0179	1.019
L-Phenylalanine	1.5434	1.4239	1.4097	1.409	1.4064
L-Aspartate	0.52854	0.96615	0.94945	0.94015	0.93948
L-Arginine	1.964	1.7999	1.7715	1.7547	1.7495
ketoisocaproic acid	0.32609	0.35715	0.40313	0.40196	0.41048
Hydroxyphenyllactic acid	0.26989	0.70273	0.69007	0.68881	0.69657
Guanosine	0.6647	0.64422	0.64329	0.63854	0.64526
Glycyl-L-leucine	0.02294	0.057515	0.1123	0.12653	0.18197
Glycitein	0.28345	0.69685	0.75376	0.7517	0.74985
Glycerol 3-phosphate	0.085409	0.3692	0.43217	0.43477	0.43349
gamma-L-Glutamyl-L-valine	0.22573	0.21406	0.24855	0.26282	0.26515
Galactonic acid	0.68951	0.62146	0.62002	0.61405	0.61406
Fructose 1-phosphate	1.0736	1.173	1.1556	1.1451	1.1439
Estriol 16.alpha.-(.beta.-D-glucuronide)	0.21139	0.25451	0.25085	0.38618	0.38504
Dodecanoic acid	0.50506	0.45309	0.49889	0.51993	0.52997
Dihydroxyacetone phosphate	1.3834	1.254	1.2313	1.2219	1.2189
D-Glucosamine 1-phosphate (Glucosamine-1P)	0.039936	0.16008	0.15725	0.16193	0.18578
D-Fructose	0.15385	0.17265	0.18053	0.21343	0.22116
Berberine	2.2713	2.0607	2.0234	2.0218	2.0164
Azelaic acid	1.8922	1.8268	1.8107	1.7958	1.7939
Atrolactic acid	0.18702	0.92332	0.92609	0.99055	0.98762
Arbutin	1.716	1.5864	1.5608	1.5468	1.5429
Adenosine 3',5'-cyclic phosphate (cAMP)	0.40048	0.70759	0.69584	0.70742	0.72362
Adenosine	1.8845	1.7051	1.7056	1.689	1.6865
Adenine	0.06813	0.1361	0.13484	0.14544	0.14508
4-Pyridoxic acid	0.27375	0.3974	0.44743	0.55176	0.55028
4-Hydroxycinnamic acid	0.73756	0.86934	0.85528	0.87444	0.87202
4-Hydroxy-3-methylbenzoic acid	0.22854	0.22604	0.26282	0.33603	0.33506
3',5'-Cyclic guanosine monophosphate	0.030801	0.36334	0.35692	0.36118	0.41595
2-Oxoadipic acid	0.32264	0.33838	0.36912	0.3655	0.36445
2-Hydroxyadenine	0.86048	0.92099	0.90427	0.90655	0.90399
1-Oleoyl-sn-glycerol 3-phosphate	0.27353	0.24518	0.24073	0.24568	0.24519
1-Hexadecanoyl-sn-glycero-3-phosphoethanolamine	0.43047	0.56121	0.55657	0.55619	0.55765
16-Hydroxypalmitic acid	1.2209	1.0966	1.0777	1.0809	1.0796
15-Deoxy-delta-12,14-PGJ2	0.83039	0.77153	0.75754	0.76046	0.76775
1,4-Dihydroxybenzene	0.96895	0.91907	0.93148	0.93732	0.93563
.alpha.-Hydroxybutyric acid	0.42446	0.39108	0.40408	0.4006	0.39989
M227T184_NEG	0.93391	0.83431	0.82262	0.81492	0.81715
M137T171_NEG	0.29959	0.31022	0.38211	0.43682	0.43598
M431T350_NEG	0.48681	0.50612	0.52263	0.52665	0.52512
M433T454_NEG	1.5111	1.3616	1.3383	1.3278	1.3267
M433T400_NEG	0.52879	0.57641	0.57101	0.56745	0.56713
M433T368_NEG	1.108	1.2261	1.2458	1.2348	1.2324
M421T353_NEG	0.44043	0.49326	0.52574	0.52504	0.52594
M669T455_NEG	1.1304	1.1562	1.1359	1.1247	1.1286
M669T481_NEG	0.522	0.5133	0.50557	0.50207	0.50109
M409T386_NEG	2.1111	2.2117	2.1729	2.1577	2.1517
M187T45_NEG	0.6325	0.61042	0.60157	0.60903	0.60974
M195T28_NEG	0.99193	0.88582	0.86982	0.86766	0.86974
M259T138_NEG	0.6726	0.9051	0.921	0.92982	0.92831
M463T277_NEG	0.24294	0.28548	0.30336	0.30641	0.30635
M463T304_NEG	0.16641	0.16844	0.21031	0.21935	0.21888
M161T31_NEG	0.3092	0.28016	0.28203	0.27948	0.28051
M179T32_NEG	0.56295	0.61736	0.60726	0.60609	0.6066
M357T248_NEG	2.0553	1.8355	1.8022	1.7861	1.7869
M355T194_NEG	1.4274	1.2796	1.4726	1.493	1.4887
M373T246_NEG	0.64772	0.59266	0.62276	0.63039	0.6584
M355T188_NEG	1.6494	1.4926	1.496	1.5457	1.5412
M355T146_NEG	0.82419	0.73839	0.7303	0.724	0.72299
M533T324_NEG	0.12061	0.18743	0.20968	0.20954	0.21063
M267T183_NEG	0.64547	0.57644	0.56799	0.56726	0.56584
M134T140_NEG	0.32687	0.32091	0.46193	0.5278	0.52979
M163T141_NEG	0.33743	0.36443	0.39503	0.39416	0.393
M435T391_NEG	0.49472	0.4419	0.501	0.49691	0.5109
M271T372_NEG	0.98049	0.89193	0.87876	0.87017	0.86807
M561T427_NEG	3.5589	3.3296	3.2824	3.2516	3.2431
M295T60_NEG	1.3903	1.297	1.2735	1.2647	1.2662
M1008T482_NEG	0.56154	0.75075	0.73738	0.73784	0.73805
M474T306_NEG	0.3126	0.27942	0.27454	0.27482	0.27551
M267T60_NEG	0.30077	0.31062	0.34285	0.39196	0.40371
M609T213_NEG	0.90501	0.85493	0.83941	0.84523	0.85749
M811T347_NEG	0.44927	0.64564	0.64161	0.64306	0.64141
M630T409_NEG	0.12773	0.21729	0.22196	0.22128	0.22674
M635T304_NEG	0.42537	0.38268	0.37588	0.42338	0.42378
M475T160_NEG	0.83331	0.97096	0.97275	1.0059	1.0035
M797T357_NEG	0.27977	0.32252	0.32083	0.318	0.32209
M463T210_NEG	1.4868	1.3336	1.3453	1.3428	1.3517
M722T435_NEG	0.14798	0.37326	0.37136	0.36846	0.36756
M179T335_NEG	0.56802	0.51317	0.53506	0.53123	0.53138
M677T391_NEG	0.71938	0.94374	0.92853	0.92165	0.92795
M595T430_NEG	0.61231	0.54982	0.58991	0.59546	0.59433
M737T230_NEG	0.43699	0.4324	0.42942	0.46568	0.46495
M505T235_NEG	1.4624	1.3619	1.4017	1.4196	1.4215
M742T409_NEG	0.22238	0.21318	0.22746	0.22954	0.23168
M831T234_NEG	0.96826	0.86577	0.88236	0.87374	0.87121
M483T226_NEG	0.78561	1.0398	1.0264	1.0272	1.0344
M218T66_NEG	0.46162	0.42128	0.43874	0.44115	0.45186
M503T157_NEG	0.97939	0.93754	0.92656	0.92334	0.92097
M525T499_NEG	0.25828	0.40031	0.4214	0.42152	0.42039
M597T231_NEG	1.6813	1.5015	1.4972	1.5527	1.5496
M481T139_NEG	0.17675	0.22213	0.2215	0.32686	0.32684
M861T503_NEG	0.035556	0.10288	0.10181	0.11011	0.13316
M651T335_NEG	1.2006	1.1837	1.1893	1.1805	1.1772
M381T250_NEG	2.7398	2.6992	2.6777	2.6523	2.6465
M246T144_NEG	0.72852	2.6648	2.6703	2.644	2.6376
M144T164_NEG	0.85926	0.8121	0.81105	0.80308	0.80227
M344T47_NEG	0.34339	0.38049	0.41352	0.42099	0.41994
M667T350_NEG	0.30775	0.97697	0.97847	0.96923	0.96668
M697T482_NEG	1.3216	1.3057	1.2827	1.2863	1.2825
M218T193_NEG	0.021418	0.52739	0.52309	0.60542	0.60367
M532T186_NEG	0.96112	0.94601	0.93169	0.92273	0.92001
M250T655_NEG	0.14156	0.19251	0.20058	0.20366	0.20467
M513T385_NEG	1.3822	1.51	1.4844	1.4701	1.4663
M386T275_NEG	1.2334	1.1048	1.0881	1.0888	1.0878
M461T646_NEG	0.4087	0.38322	0.44511	0.51285	0.52618
M68T35_NEG	0.071708	0.10472	0.11223	0.17993	0.208
M254T644_NEG	0.30705	0.48309	0.47953	0.48651	0.48917
M379T313_NEG	2.6422	2.4246	2.3884	2.365	2.3586
M657T211_NEG	0.31218	0.41732	0.43545	0.51088	0.51207
M166T333_NEG	0.58718	0.52588	0.51938	0.51634	0.51509
M659T228_NEG	0.00245	0.22971	0.22672	0.22451	0.224
M453T405_NEG	1.8438	1.9184	1.8847	1.8707	1.8674
M461T392_NEG	1.1937	1.2784	1.2732	1.2612	1.2619
M135T38_NEG	0.28733	0.26226	0.27361	0.27984	0.28207
M145T124_NEG	3.6411	3.6074	3.601	3.5686	3.558
M259T105_NEG	0.93543	0.84442	0.8587	0.85045	0.84881
M569T399_NEG	3.7614	4.046	3.9732	3.9435	3.9323
M721T463_NEG	1.4856	1.4096	1.4021	1.3963	1.3947
M1017T262_NEG	0.28871	0.26586	0.27605	0.28005	0.304
M200T144_NEG	1.7683	1.6658	1.6368	1.624	1.6198
M547T270_NEG	0.5272	0.52135	0.52478	0.53341	0.59297
M876T510_NEG	0.36274	0.75294	0.78006	0.77255	0.79324
M615T231_NEG	0.32901	0.69891	0.6875	0.80055	0.8034
M219T34_NEG	0.050764	0.84069	0.82614	0.82282	0.8221
M280T146_NEG	0.091403	0.32186	0.34403	0.34065	0.33965
M1000T412_NEG	0.17471	0.19158	0.21175	0.21817	0.22871
M507T333_NEG	0.12876	0.34069	0.33454	0.46241	0.49816
M754T483_NEG	3.3271	2.9782	2.93	2.9124	2.9045
M705T510_NEG	0.45071	0.69928	0.68743	0.69786	0.69596
M807T458_NEG	1.3872	1.2961	1.292	1.2801	1.2769
M1047T322_NEG	1.1321	1.1544	1.1836	1.2411	1.2459
M733T262_NEG	0.12237	0.41642	0.4809	0.47617	0.47477
M328T403_NEG	0.29407	0.32854	0.3319	0.33015	0.33566
M127T677_NEG	0.37621	0.4756	0.4671	0.46716	0.46963
M371T45_NEG	2.728	2.4966	2.4613	2.466	2.4591
M1015T282_NEG	0.60482	0.6737	0.6653	0.65896	0.67595
M657T399_NEG	1.8128	1.6338	1.6055	1.591	1.5893
M231T30_NEG	1.9135	1.712	1.6837	1.6699	1.6655
M935T214_NEG	0.081506	0.09842	0.10069	0.19546	0.21282
M359T350_NEG	0.73922	0.66432	0.67755	0.67096	0.66898
M368T231_NEG	2.4826	2.5667	2.5314	2.5066	2.4999
M437T208_NEG	1.5004	1.4569	1.5287	1.5168	1.5128
M495T273_NEG	2.0099	1.8427	1.8093	1.7979	1.7928
M569T198_NEG	0.87927	1.1554	1.1344	1.124	1.1376
M727T368_NEG	1.4187	1.2687	1.2999	1.3018	1.311
M747T368_NEG	0.80695	0.75585	0.76949	0.79491	0.80419
M487T385_NEG	1.7674	1.8941	1.863	1.8529	1.8476
M531T192_NEG	0.30511	0.41576	0.42544	0.45427	0.45504
M245T156_NEG	1.9857	2.1462	2.1099	2.0895	2.0879
M385T178_NEG	0.83414	0.76604	0.75226	0.74546	0.74415
M284T166_NEG	2.0411	2.0218	1.9853	1.9671	1.9628
M544T334_NEG	0.50905	0.51502	0.50998	0.51464	0.54473
M501T153_NEG	1.2614	1.4941	1.5218	1.5228	1.5211
M585T385_1_NEG	1.5242	1.3868	1.3845	1.3767	1.3736
M623T436_NEG	1.8638	1.6656	1.6369	1.6218	1.6185
M457T391_NEG	0.003917	0.15287	0.15069	0.15267	0.15904
M427T30_NEG	1.8212	1.6329	1.6076	1.5937	1.5905
M339T59_NEG	0.16293	0.31332	0.31599	0.35478	0.35891
M772T261_NEG	2.0219	1.8784	1.8589	1.8888	1.89
M515T158_NEG	0.28769	0.35621	0.428	0.56419	0.57416
M665T464_NEG	0.70515	0.63339	0.63285	0.63003	0.63122
M326T380_NEG	0.47094	0.6971	0.68445	0.70711	0.70541
M942T412_NEG	0.38023	0.37537	0.37005	0.37006	0.37252
M845T286_NEG	0.055303	0.62942	0.618	0.62133	0.61965
M515T409_NEG	0.10088	0.090181	0.088552	0.12837	0.1433
M985T340_NEG	1.7782	1.5934	1.5719	1.5647	1.6116
M585T345_NEG	0.40621	0.56143	0.5538	0.55477	0.55485
M675T207_NEG	0.35358	0.32649	0.32146	0.38808	0.38982
M630T326_NEG	0.56155	0.51631	0.53739	0.56028	0.57059
M459T246_NEG	0.13285	0.15898	0.32101	0.32212	0.3411
M253T745_NEG	0.86461	0.77684	0.7719	0.76901	0.76724
M799T210_NEG	0.61642	0.55355	0.60331	0.60599	0.60453
M804T409_NEG	0.21778	0.25668	0.27245	0.27964	0.28041
M669T338_NEG	1.5033	1.4417	1.5136	1.4998	1.4958
M587T455_NEG	0.95319	1.1441	1.1267	1.124	1.1244
M480T412_NEG	2.3036	2.5746	2.5279	2.5037	2.505
M181T145_NEG	1.0131	1.1793	1.1644	1.153	1.1511
M507T311_NEG	0.37183	0.41804	0.41094	0.49441	0.52779
M531T298_NEG	0.066486	0.079267	0.14725	0.18475	0.18454
M439T425_2_NEG	0.52478	0.47379	0.46651	0.46267	0.46149
M693T218_1_NEG	1.3171	1.1812	1.1604	1.149	1.1463
M223T166_NEG	0.056929	0.089585	0.10361	0.10286	0.10424
M737T503_NEG	1.0782	1.2766	1.2577	1.2492	1.2503
M768T412_NEG	0.86073	0.78752	0.77859	0.77093	0.78291
M673T207_NEG	0.67469	0.65611	0.64444	0.67458	0.67263
M669T194_NEG	0.28536	0.29861	0.29377	0.32018	0.31947
M845T436_NEG	0.49747	0.48308	0.5194	0.5143	0.51292
M355T62_NEG	0.019455	0.11484	0.1134	0.14348	0.14401
M509T155_NEG	0.3793	0.35553	0.35987	0.37002	0.36958
M267T54_NEG	0.44196	0.74958	0.73611	0.74218	0.74069
M253T769_NEG	0.36263	0.33865	0.33496	0.33223	0.33306
M133T132_NEG	0.58567	0.54692	0.54266	0.53741	0.53618
M131T645_NEG	1.3125	1.7689	1.76	1.75	1.7457
M765T320_NEG	0.70864	0.63635	0.66841	0.66767	0.66762
M557T405_NEG	0.43926	0.5475	0.53843	0.5388	0.53846
M275T333_NEG	1.809	2.0534	2.0183	1.9988	1.9972
M371T287_NEG	1.6117	1.4725	1.5887	1.5908	1.5863
M207T29_NEG	1.0871	1.0624	1.0468	1.0388	1.0369
M789T293_NEG	0.11769	0.41442	0.40929	0.40603	0.40724
M198T137_NEG	0.014979	0.029115	0.029542	0.03046	0.03076
M381T356_NEG	0.048622	0.045883	0.04505	0.047581	0.047658
M424T153_NEG	0.08248	0.099964	0.12131	0.12026	0.12412
M948T479_NEG	0.15001	0.46619	0.45961	0.47455	0.48164
M336T35_NEG	1.0628	0.95234	0.93516	0.94803	0.95561
M683T245_NEG	0.80148	0.9266	0.91287	0.90559	0.90449
M95T25_NEG	1.0545	0.98575	0.97068	0.96169	0.96128
M282T46_NEG	0.42899	0.38589	0.40427	0.41346	0.41507
M319T25_NEG	1.4999	1.3507	1.3267	1.3164	1.3126
M368T235_NEG	0.83578	0.85754	0.85362	0.84714	0.84886
M666T453_NEG	0.16034	0.1461	0.16604	0.16452	0.16429
M365T373_NEG	0.42584	0.67822	0.6792	0.67438	0.67281
M393T194_NEG	1.3464	1.2024	1.4368	1.4513	1.4471
M265T41_NEG	0.034939	0.032575	0.033375	0.033151	0.03327
M352T34_NEG	1.0512	0.95073	0.94026	0.94232	0.93956
M127T695_NEG	1.1808	1.1842	1.1665	1.1901	1.1875
M379T36_NEG	0.054066	0.077042	0.081088	0.10213	0.10261
M781T418_NEG	0.0057507	0.34416	0.36562	0.36212	0.36108
M501T209_NEG	0.20633	0.19918	0.19723	0.19758	0.19716
M305T41_NEG	0.12471	0.27039	0.271	0.2686	0.27285
M267T748_NEG	0.3212	0.30521	0.31036	0.31276	0.31207
M447T646_NEG	0.18055	0.22989	0.25684	0.32504	0.33375
M179T55_NEG	0.51859	0.48142	0.4937	0.4894	0.49356
M771T475_NEG	0.2654	0.34408	0.3385	0.33729	0.3383
M884T412_NEG	0.44747	0.47322	0.47607	0.47298	0.47523
M516T350_NEG	0.82953	0.74458	0.77445	0.77125	0.76898
M699T209_NEG	0.17181	0.21752	0.22324	0.22164	0.22118
M454T150_NEG	0.51496	0.46044	0.47612	0.48099	0.48004
M631T447_NEG	0.14149	0.62695	0.61769	0.61903	0.61725
M252T162_NEG	0.0028762	0.17616	0.17381	0.17429	0.17548
M429T130_NEG	0.53218	0.60922	0.60472	0.64218	0.64087
M548T139_NEG	0.096717	0.85919	0.8608	0.86144	0.86073
M351T167_NEG	0.11064	0.10177	0.20321	0.22178	0.22412
M688T409_NEG	0.042307	0.051953	0.15633	0.18805	0.18753
M787T392_NEG	0.98677	1.0851	1.0724	1.0621	1.062
M237T135_NEG	0.0081997	0.21558	0.22044	0.39082	0.39007
M671T375_NEG	3.2444	3.4085	3.3468	3.3273	3.3178
M590T345_NEG	0.95476	0.93936	0.92441	0.91574	0.91514
M457T200_NEG	0.23542	0.89638	0.89614	0.90012	0.89746
M472T306_NEG	0.36439	0.32541	0.31982	0.31884	0.3189
M443T419_NEG	1.0005	1.2839	1.2606	1.262	1.2586
M643T243_NEG	0.28919	0.31452	0.55154	0.55872	0.5865
M173T185_2_NEG	0.089352	0.36457	0.38066	0.39076	0.39066
M459T144_NEG	0.39803	0.41267	0.43479	0.50375	0.50835
M738T374_NEG	0.78412	0.75308	0.76711	0.76067	0.75893
M451T223_NEG	0.41573	0.3858	0.49268	0.67172	0.68147
M429T246_NEG	1.34	1.1969	1.1771	1.166	1.1672
M881T282_NEG	0.040789	0.93252	0.96579	0.97057	0.96964
M205T80_NEG	0.25075	0.23765	0.25001	0.24817	0.24932
M252T655_NEG	0.7366	0.75321	0.74275	0.73764	0.73566
M639T273_NEG	0.61878	0.61335	0.63591	0.64685	0.64639
M627T253_NEG	1.2923	1.3574	1.3411	1.3326	1.3293
M271T722_NEG	0.28984	0.2849	0.2865	0.29965	0.30195
M720T293_NEG	0.093323	0.59994	0.66164	0.69475	0.71738
M298T59_NEG	0.016849	0.015263	0.16841	0.17013	0.16991
M901T512_NEG	0.32449	0.5242	0.52319	0.52464	0.54703
M271T694_NEG	0.65283	0.68507	0.68895	0.68522	0.68515
M510T338_NEG	1.0041	1.0583	1.0393	1.0312	1.031
M156T751_NEG	0.43095	0.51131	0.50268	0.4981	0.5006
M127T721_NEG	1.2095	1.0972	1.0795	1.0693	1.0689
M360T61_NEG	0.11389	0.11006	0.14867	0.14924	0.16259
M310T60_NEG	0.27428	0.30438	0.36167	0.38938	0.38868
M296T60_NEG	0.76171	0.75771	0.77586	0.76826	0.76777
M505T410_NEG	0.3797	0.33983	0.33836	0.36034	0.3606
M520T159_NEG	0.61486	0.64099	0.62965	0.63075	0.63013
M770T418_NEG	0.59111	0.56357	0.7114	0.72099	0.71886
M535T189_NEG	0.73504	0.82404	0.81149	0.82361	0.82147
M341T30_NEG	0.80125	0.82778	0.81762	0.81666	0.82304
M475T333_NEG	0.4862	1.1123	1.1038	1.0951	1.0936
M261T731_NEG	0.43461	0.46695	0.53303	0.53482	0.53639
M288T29_NEG	1.17	1.0809	1.0662	1.0558	1.0537
M199T63_NEG	0.50392	0.46068	0.45381	0.45219	0.45087
M585T307_NEG	0.020874	0.53532	0.52776	0.54092	0.53952
M676T431_NEG	0.68467	0.92099	0.94947	0.94395	0.94117
M669T201_NEG	2.1951	2.0485	2.0369	2.0179	2.0121
M353T31_NEG	2.0278	1.8494	1.8196	1.8019	1.7966
M777T348_NEG	0.35026	0.4528	0.47567	0.51707	0.51855
M529T193_NEG	0.78932	0.81709	0.87036	0.86195	0.85989
M348T178_NEG	0.029171	0.24355	0.23926	0.23984	0.24219
M783T464_NEG	0.85261	0.86226	0.88742	0.88596	0.88347
M749T405_NEG	2.5144	2.5037	2.4614	2.4428	2.4356
M806T503_NEG	0.079777	0.087959	0.15191	0.19417	0.19368
M315T139_NEG	0.66928	0.78797	0.77371	0.76626	0.76475
M717T306_NEG	0.97228	0.91761	1.0607	1.0569	1.0624
M407T202_NEG	0.075117	0.60836	0.60255	0.64324	0.64524
M529T479_NEG	0.66409	0.91688	0.9153	0.90647	0.92715
M232T748_NEG	1.0914	1.0119	0.99438	0.98686	0.9882
M802T410_NEG	0.59619	0.54814	0.56839	0.56376	0.56618
M737T202_NEG	0.162	0.59006	0.58266	0.6082	0.61378
M239T111_NEG	0.86386	0.79689	0.78439	0.78392	0.78387
M795T514_NEG	0.46244	0.49405	0.48533	0.48071	0.48183
M717T379_NEG	0.54582	0.82279	0.83451	0.82712	0.83203
M675T383_NEG	1.1308	1.0839	1.076	1.0687	1.0673
M897T291_NEG	0.64635	0.8364	0.83594	0.90405	0.90145
M317T336_NEG	0.79481	0.71407	0.76188	0.75569	0.7661
M376T138_NEG	1.6587	1.4826	1.4561	1.4429	1.4391
M665T217_NEG	0.20651	0.21519	0.2226	0.23267	0.23259
M127T751_NEG	0.059415	0.055171	0.063063	0.1249	0.13407
M653T334_NEG	0.44777	0.52201	0.55792	0.56272	0.56872
M261T303_NEG	0.77078	0.7477	0.73443	0.72921	0.73889
M623T200_NEG	0.30026	0.4201	0.44696	0.50245	0.50507
M799T413_NEG	0.32245	0.38519	0.38354	0.37984	0.37956
M371T224_NEG	0.041927	0.106	0.29947	0.29983	0.31853
M261T751_NEG	0.68325	0.61104	0.60754	0.60502	0.61068
M308T145_NEG	2.1169	1.9629	1.9272	1.9083	1.9027
M797T204_NEG	0.47318	0.73857	0.75279	0.80143	0.8053
M331T30_NEG	1.9346	1.738	1.7077	1.6948	1.6912
M659T437_NEG	0.23965	0.4484	0.44086	0.44123	0.44034
M347T59_NEG	0.44762	0.40219	0.39921	0.39555	0.3944
M313T758_NEG	0.92125	0.82829	0.81458	0.80697	0.80668
M587T307_NEG	0.68097	0.93492	0.94019	0.93105	0.93061
M327T58_NEG	0.18314	0.20207	0.20908	0.20973	0.20914
M713T184_NEG	0.42194	0.41204	0.44251	0.44745	0.45311
M408T36_NEG	2.6927	2.5033	2.4681	2.4439	2.4369
M496T337_NEG	1.0707	0.97738	0.96004	0.95078	0.94889
M799T343_NEG	0.14988	0.26344	0.28254	0.28363	0.28296
M583T181_2_NEG	0.22628	0.24702	0.24254	0.24688	0.2472
M516T176_NEG	0.52579	0.66044	0.66055	0.65819	0.65712
M183T752_NEG	0.89436	0.81386	0.80798	0.804	0.80669
M237T64_NEG	0.45095	0.43564	0.48849	0.49603	0.49548
M637T274_NEG	0.061984	1.1299	1.1238	1.1339	1.1352
M509T251_NEG	2.5646	2.295	2.2707	2.2495	2.2455
M845T356_NEG	0.19895	0.55108	0.54201	0.53689	0.53531
M923T356_NEG	1.2746	1.2306	1.2468	1.2347	1.2322
M271T750_NEG	2.2308	2.3104	2.2685	2.2471	2.2429
M1057T306_NEG	0.34392	0.48879	0.5168	0.51209	0.51637
M349T205_NEG	2.0268	1.8214	1.9191	1.9054	1.9
M587T175_NEG	0.74919	0.76375	0.76806	0.83613	0.83435
M807T447_NEG	0.58555	0.80309	0.79801	0.79304	0.7907
M285T650_NEG	0.056693	0.36382	0.48271	0.48138	0.48698
M494T162_NEG	0.66618	0.61488	0.605	0.60083	0.59936
M405T365_NEG	0.46693	0.44255	0.43653	0.43752	0.4379
M480T353_NEG	0.04803	0.18929	0.18588	0.18407	0.185
M287T331_NEG	0.14659	0.42828	0.42092	0.43447	0.43326
M397T277_NEG	0.53506	0.4785	0.46999	0.46854	0.46888
M917T511_NEG	0.56343	0.50338	0.49827	0.52417	0.52857
M131T31_NEG	1.2897	1.164	1.151	1.14	1.1368
M236T708_NEG	0.38739	0.34641	0.34146	0.33934	0.33865
M421T57_NEG	0.84352	0.75376	0.7401	0.75356	0.75159
M228T184_NEG	0.86225	0.77264	0.7617	0.75477	0.75369
M239T709_NEG	1.2051	1.0762	1.0574	1.0486	1.0458
M507T368_NEG	0.013188	0.7216	0.7439	0.73846	0.7369
M282T138_2_NEG	0.057176	0.20716	0.20553	0.23692	0.23992
M468T173_NEG	0.24218	0.41485	0.40888	0.40757	0.40897
M174T237_NEG	0.197	0.27792	0.31697	0.32403	0.33616
M921T408_NEG	0.32388	0.72385	0.7446	0.73873	0.73937
M451T247_NEG	0.4027	0.3949	0.41019	0.42268	0.42143
M130T132_NEG	0.529	0.47305	0.51484	0.51173	0.51022
M831T260_NEG	0.36838	0.46196	0.46225	0.4903	0.4963
M299T169_1_NEG	0.5494	0.54893	0.55862	0.57612	0.57969
M454T34_NEG	0.066174	0.072753	0.071471	0.14067	0.14605
M509T372_NEG	0.14839	0.20051	0.21355	0.21209	0.21643
M210T125_NEG	0.80621	0.74819	0.75045	0.76729	0.76542
M386T145_NEG	0.92279	0.89479	0.92014	0.92942	0.92689
M623T294_NEG	0.68059	0.68727	0.6967	0.76088	0.77316
M561T216_NEG	0.1054	0.11493	0.18802	0.18626	0.18944
M507T168_NEG	0.95284	1.0076	1.0656	1.0616	1.0647
M797T422_NEG	0.21851	0.30413	0.30187	0.3001	0.30051
M872T270_NEG	0.35681	0.69775	0.6852	0.70694	0.70502
M267T776_NEG	0.9713	0.92686	0.93433	0.92585	0.92559
M492T173_NEG	2.0883	2.0266	2.0379	2.0746	2.0727
M692T226_NEG	0.31114	0.39851	0.46232	0.46913	0.51209
M183T184_NEG	0.77111	0.68863	0.67915	0.67294	0.67467
M236T644_NEG	0.11395	0.63043	0.6311	0.63133	0.63188
M291T46_NEG	0.057753	0.52546	0.51593	0.54986	0.56863
M240T46_NEG	0.31886	0.29626	0.31184	0.34644	0.3552
M237T651_NEG	0.68051	0.63677	0.62623	0.62009	0.62979
M746T227_NEG	0.69089	0.69332	0.68266	0.67938	0.68677
M277T32_NEG	0.20843	0.22883	0.22727	0.23665	0.23677
M211T63_NEG	0.68725	0.85417	0.8393	0.85287	0.85066
M229T758_NEG	0.065276	0.058388	0.063992	0.079339	0.098406
M458T149_NEG	1.1536	1.1242	1.1049	1.0953	1.0936
M271T775_NEG	0.63562	0.7238	0.71167	0.73229	0.73154
M273T58_NEG	1.2332	1.8332	1.8052	1.7878	1.7866
M806T513_NEG	0.51345	0.46698	0.46103	0.45767	0.45653
M289T189_NEG	0.29711	0.33888	0.45253	0.53682	0.53645
M575T391_NEG	0.91908	1.1584	1.1402	1.13	1.1279
M539T273_NEG	0.62503	0.66952	0.71365	0.76149	0.77057
M363T59_NEG	0.35728	0.39752	0.39584	0.39287	0.40117
M287T46_NEG	0.16134	0.20369	0.20307	0.20126	0.20074
M277T37_NEG	0.61242	0.95685	1.1434	1.1576	1.1557
M723T350_NEG	0.32291	0.80552	0.80389	0.79682	0.795
M615T391_NEG	0.68905	0.87287	0.89579	0.90051	0.91019
M255T741_NEG	0.45441	0.45197	0.45507	0.47444	0.48959
M207T26_NEG	0.10368	0.095913	0.1356	0.25023	0.25081
M309T115_NEG	1.042	0.98364	0.97078	1.0057	1.0033
M232T708_NEG	0.20409	0.19716	0.19369	0.19424	0.20629
M259T59_NEG	0.16067	0.14424	0.14197	0.14158	0.14122
M384T341_NEG	0.8421	0.75573	0.75053	0.78668	0.78686
M382T190_NEG	0.83205	0.85882	0.88256	0.89423	0.89161
M265T129_NEG	0.86704	0.90264	0.94069	1.0098	1.0109
M879T318_NEG	1.296	1.2439	1.2213	1.2263	1.2284
M913T499_NEG	0.10582	0.095837	0.14314	0.1423	0.20393
M903T323_NEG	1.9955	1.8887	1.8681	1.8587	1.8583
M315T484_NEG	3.4783	3.6239	3.5582	3.5293	3.5215
M334T189_NEG	1.4569	1.5577	1.5514	1.5363	1.532
M426T410_NEG	0.47737	0.55069	0.58731	0.58273	0.58173
M900T506_NEG	0.057959	0.17783	0.21559	0.21472	0.22105
M213T633_NEG	1.0614	0.95277	0.94658	0.93986	0.93795
M257T761_NEG	0.16523	0.39181	0.42264	0.44218	0.44365
M555T389_NEG	1.2132	1.1155	1.0967	1.0913	1.0893
M401T386_NEG	0.20672	0.20204	0.20942	0.20793	0.20786
M603T170_NEG	0.76181	0.72413	0.71318	0.70774	0.70699
M402T147_NEG	0.92834	0.99099	0.98824	1.0013	0.99839
M319T372_NEG	0.90062	0.83839	0.8241	0.81648	0.81504
M417T343_NEG	0.10654	0.54026	0.53495	0.53738	0.5358
M177T769_NEG	0.41788	0.39396	0.41823	0.48593	0.4845
M291T59_NEG	0.14627	0.14577	0.14368	0.14431	0.15659
M511T385_NEG	0.40534	0.37785	0.39311	0.40549	0.40461
M777T244_NEG	0.77495	0.73155	0.71927	0.74351	0.75044
M781T351_NEG	0.12729	0.39698	0.39376	0.39242	0.39142
M177T742_NEG	0.99945	1.0778	1.0591	1.0488	1.0507
M253T719_NEG	0.32898	0.68635	0.67549	0.66909	0.66733
M231T750_NEG	0.86037	0.8762	0.86823	0.85991	0.85951
M235T56_NEG	0.37462	0.33468	0.32962	0.34595	0.34653
M284T103_NEG	0.27172	0.24787	0.24932	0.24881	0.25178
M725T372_NEG	1.0496	1.0843	1.0659	1.0638	1.0647
M719T332_NEG	0.087287	0.49727	0.50952	0.50715	0.50774
M319T37_NEG	0.88924	0.79616	0.78479	0.80854	0.80813
M267T705_NEG	0.41947	0.44328	0.47138	0.47832	0.48152
M356T184_NEG	1.6294	1.4913	1.5037	1.5793	1.5748
M192T30_NEG	0.12935	0.12228	0.20951	0.2082	0.20892
M239T742_NEG	0.19459	0.1938	0.20638	0.20497	0.20911
M232T776_NEG	0.090371	0.36402	0.36011	0.35694	0.35662
M335T42_NEG	0.38897	0.39995	0.40044	0.39848	0.39936
M784T501_NEG	1.7528	1.5709	1.5477	1.5336	1.5321
M485T352_NEG	0.16659	0.26714	0.27995	0.29869	0.29908
M284T342_NEG	0.10097	0.14685	0.15558	0.16046	0.16346
M173T50_NEG	0.011443	0.28792	0.28505	0.33656	0.3443
M551T451_NEG	0.50437	0.61006	0.60065	0.60514	0.60437
M782T430_NEG	1.0334	1.0026	1.0534	1.0865	1.0842
M270T143_NEG	1.726	1.8158	1.7859	1.7711	1.7696
M793T391_NEG	0.87631	1.314	1.2984	1.2859	1.2981
M238T66_2_NEG	0.2486	0.22518	0.3032	0.3046	0.30656
M239T769_NEG	0.55526	0.53424	0.53103	0.52954	0.52873
M514T201_NEG	1.0057	0.91557	0.8995	0.90208	0.89972
M265T42_NEG	1.2796	1.2265	1.2126	1.2058	1.2048
M646T372_NEG	0.6328	0.58037	0.5828	0.57793	0.57678
M391T231_NEG	0.84575	0.86876	0.93128	0.9262	0.92388
M419T348_NEG	0.89264	0.81551	0.80117	0.80392	0.8032
M409T376_NEG	0.091757	0.1342	0.17797	0.21177	0.21827
M316T133_NEG	0.089604	1.1279	1.1432	1.1439	1.1408
M314T137_NEG	0.49241	0.7344	0.7766	0.77954	0.77912
M289T278_NEG	1.6474	1.6894	1.6658	1.6517	1.6472
M357T288_NEG	0.44922	0.41578	0.82357	0.82093	0.82475
M244T178_NEG	0.33342	0.30444	0.30721	0.34155	0.34135
M455T41_NEG	0.44062	0.40057	0.39465	0.39155	0.39276
M426T231_NEG	1.4063	1.4241	1.4156	1.445	1.4407
M563T182_NEG	0.41417	0.54703	0.54265	0.60105	0.59962
M523T286_NEG	0.30469	0.27716	0.28511	0.2901	0.30195
M239T304_NEG	0.32674	0.29289	0.29061	0.31698	0.31663
M177T15_NEG	1.0047	0.89784	0.88872	0.88356	0.88104
M256T749_NEG	0.16282	0.21952	0.23105	0.26158	0.26676
M737T326_NEG	0.98807	0.92349	0.92767	0.95569	0.96104
M555T464_NEG	0.37741	0.55096	0.55621	0.5885	0.58697
M369T425_NEG	0.36227	0.32353	0.34313	0.35359	0.35472
M267T193_NEG	0.33343	0.62959	0.62218	0.68623	0.68422
M356T195_NEG	0.59881	0.5805	0.62742	0.62134	0.62027
M198T669_NEG	0.12259	0.11263	0.15906	0.1578	0.15798
M376T168_NEG	0.13861	0.30456	0.31092	0.32809	0.32932
M509T303_NEG	0.11355	0.1244	0.39485	0.41036	0.49243
M357T274_NEG	3.0368	2.8141	2.7668	2.7532	2.7452
M183T714_NEG	0.52167	0.50381	0.49615	0.49155	0.49107
M1183T294_NEG	0.88839	0.85884	0.91684	0.90814	0.94191
M585T232_NEG	0.51621	0.46098	0.456	0.49605	0.55897
M391T412_NEG	1.3038	1.6564	1.627	1.6166	1.6119
M467T238_NEG	1.996	1.9468	1.952	1.9954	1.9971
M661T193_NEG	0.12863	0.27936	0.36808	0.36491	0.37405
M677T277_NEG	0.0058855	0.33796	0.39971	0.39978	0.44247
M268T153_NEG	1.8727	1.7623	1.742	1.7253	1.7285
M827T362_NEG	0.22786	0.57028	0.57403	0.56954	0.56993
M1187T207_NEG	0.41715	0.39138	0.47847	0.4802	0.47888
M773T261_NEG	1.8676	1.7329	1.7159	1.7411	1.7425
M924T458_NEG	1.7098	1.7361	1.7245	1.7265	1.7215
M325T154_NEG	1.1437	1.0218	1.0051	1.0067	1.0037
M127T776_NEG	0.79482	0.79246	0.78784	0.7864	0.78883
M663T235_NEG	1.7642	2.0097	1.9914	1.9734	1.9701
M843T215_NEG	0.053362	0.20734	0.20747	0.20564	0.26069
M599T226_NEG	1.8177	1.7632	1.7764	1.7599	1.7548
M181T193_NEG	0.19652	0.46455	0.45878	0.51616	0.51469
M639T179_NEG	0.63792	0.5727	0.6974	0.69085	0.7106
M425T226_NEG	1.8461	1.6486	1.6221	1.6197	1.6289
M543T251_NEG	3.2105	2.8671	2.8166	2.7942	2.7896
M371T353_NEG	0.26032	0.24601	0.273	0.27243	0.27175
M229T730_NEG	0.1422	0.13159	0.18212	0.18065	0.18194
M366T346_NEG	0.14919	0.13809	0.15901	0.15775	0.1574
M841T230_NEG	1.5353	1.6442	1.6155	1.6003	1.6022
M601T220_NEG	0.54119	0.55009	0.65471	0.65795	0.65671
M708T538_NEG	1.5531	1.3954	1.3824	1.3705	1.3666
M833T242_NEG	0.057063	0.072032	0.2563	0.27077	0.27457
M820T412_NEG	0.34149	0.4744	0.46582	0.47074	0.48357
M571T240_NEG	0.2804	0.56224	0.56274	0.56674	0.57602
M865T349_1_NEG	0.010898	0.020004	0.024522	0.025543	0.14158
M592T305_NEG	0.65772	0.60663	0.68031	0.6891	0.69301
M383T59_NEG	0.17273	0.26046	0.26994	0.2707	0.2857
M316T36_NEG	0.044182	0.057304	0.21836	0.21751	0.21831
M180T15_NEG	1.035	1.0042	0.99283	0.98384	0.98389
M675T362_NEG	0.20186	0.44935	0.45636	0.45226	0.45362
M529T298_NEG	0.64072	0.59561	0.58525	0.59559	0.5946
M1087T294_NEG	0.69536	0.62258	0.69323	0.82293	0.8294
M633T352_NEG	0.28138	0.33261	0.3272	0.38051	0.38016
M393T367_NEG	0.70561	0.65609	0.64508	0.63874	0.63708
M359T274_NEG	1.5149	1.4964	1.4773	1.4677	1.4647
M585T204_NEG	0.84609	1.1664	1.1926	1.1832	1.1879
M179T152_NEG	0.61998	0.55522	0.54516	0.54002	0.53901
M635T359_NEG	0.37432	0.47645	0.48013	0.52042	0.51905
M555T221_NEG	1.5494	1.4227	1.4351	1.4268	1.426
M135T201_NEG	1.1308	1.0412	1.0428	1.054	1.0514
M428T247_NEG	1.7322	1.5501	1.5499	1.5351	1.5307
M367T204_NEG	0.38888	0.37241	0.36926	0.40297	0.41244
M505T350_NEG	1.1833	1.0679	1.0605	1.0523	1.0612
M154T771_NEG	0.28128	0.33823	0.33943	0.34203	0.34212
M321T17_NEG	0.69323	0.62008	0.6091	0.60628	0.6045
M343T243_NEG	0.71646	0.70759	0.81823	0.82683	0.83967
M196T174_NEG	0.20215	0.19119	0.19638	0.19938	0.20377
M566T294_NEG	0.57708	0.51591	0.52514	0.57146	0.57573
M665T348_NEG	1.6584	1.4861	1.4662	1.4938	1.5175
M233T765_NEG	0.2975	0.68405	0.6731	0.66814	0.66637
M143T89_NEG	1.7237	1.5517	1.5287	1.5333	1.5309
M521T353_NEG	0.093135	0.27127	0.29164	0.30722	0.307
M585T356_2_NEG	0.018169	0.04428	0.04624	0.047982	0.048021
M183T16_NEG	0.0037146	0.35323	0.35384	0.35096	0.34998
M419T57_NEG	1.0414	0.98143	0.98719	0.99722	0.9953
M477T251_NEG	0.14558	0.14788	0.1878	0.22955	0.23042
M255T772_NEG	0.54826	0.51178	0.50906	0.50969	0.51002
M563T356_NEG	0.15478	0.61543	0.60801	0.61468	0.61457
M435T134_NEG	0.25284	0.28033	0.30097	0.30099	0.30417
M787T471_NEG	0.54455	0.62732	0.62069	0.61604	0.6145
M160T681_NEG	1.1652	1.0456	1.0662	1.0613	1.0582
M261T45_NEG	0.1337	0.13046	0.23989	0.23869	0.24657
M277T200_NEG	1.879	1.678	1.6489	1.6664	1.6619
M939T501_NEG	0.48944	0.738	0.72591	0.71898	0.71949
M745T407_NEG	0.19699	0.18439	0.22493	0.22286	0.23181
M231T714_NEG	0.25938	0.33252	0.32694	0.32383	0.32288
M336T139_NEG	0.276	0.61774	0.61584	0.61474	0.61304
M257T727_NEG	0.032405	0.057968	0.1625	0.20889	0.22387
M487T216_NEG	0.33277	0.33085	0.38374	0.38053	0.44152
M703T362_NEG	0.50242	0.57015	0.55981	0.55901	0.56193
M753T347_NEG	0.42106	0.46307	0.47524	0.47578	0.47456
M393T368_NEG	2.2675	2.0358	2.0248	2.022	2.016
M537T323_NEG	0.69387	0.68547	0.69854	0.69169	0.72061
M229T707_NEG	0.031756	0.4161	0.46337	0.4608	0.46819
M587T362_NEG	0.95448	1.0066	0.98842	0.97928	0.97639
M1119T394_2_NEG	0.17032	0.15413	0.17212	0.18885	0.18846
M777T375_NEG	1.3367	1.2487	1.2387	1.2299	1.2279
M807T338_NEG	0.041888	0.093425	0.49162	0.48683	0.50055
M340T144_NEG	2.0224	1.8063	1.8727	1.8556	1.8505
M239T57_NEG	0.93941	0.91006	0.89659	0.89782	0.8977
M539T151_NEG	0.50453	0.51507	0.51195	0.56623	0.56469
M360T153_NEG	1.0433	0.9394	0.93321	0.92406	0.92166
M747T227_NEG	0.72454	0.70053	0.68783	0.68156	0.68123
M219T138_NEG	0.94415	0.98656	0.99268	0.99764	0.9947
M599T254_NEG	0.41536	0.39716	0.38997	0.38683	0.38577
M178T744_NEG	0.13482	0.23704	0.23274	0.23699	0.2644
M751T347_NEG	0.25613	0.36539	0.37848	0.38487	0.38374
M335T150_NEG	3.1959	2.854	2.8242	2.8663	2.8581
M227T45_NEG	0.98529	0.88665	0.9064	0.91311	0.91112
M175T14_NEG	0.14828	0.14095	0.15819	0.15737	0.16486
M122T56_NEG	3.5611	3.3056	3.2477	3.2373	3.2284
M560T439_NEG	0.64783	0.68604	0.67896	0.6876	0.6866
M737T215_NEG	0.49425	0.49711	0.58093	0.73883	0.74357
M479T233_NEG	2.393	2.1472	2.1089	2.0964	2.0907
M261T703_NEG	0.14698	0.15432	0.21421	0.22983	0.23236
M398T181_NEG	0.50908	0.46622	0.45836	0.45758	0.45891
M515T196_NEG	1.6227	1.934	1.9397	1.9456	1.9431
M567T261_NEG	0.70962	0.83127	0.82299	0.81653	0.8203
M217T39_NEG	0.78089	0.69901	0.68864	0.69118	0.69121
M627T291_NEG	0.1785	0.15974	0.17868	0.21056	0.21152
M1021T293_NEG	0.096143	0.086333	0.33165	0.36255	0.36334
M1071T358_NEG	1.7424	1.7725	1.7449	1.728	1.7246
M429T153_NEG	0.83395	0.75983	0.7647	0.76385	0.76243
M299T298_NEG	0.45394	0.40605	0.39875	0.42194	0.45312
M268T143_NEG	0.51827	0.48201	0.50516	0.51319	0.51169
M302T83_NEG	1.1527	1.1736	1.1598	1.1518	1.1484
M676T287_NEG	0.40112	0.50088	0.55897	0.56059	0.56483
M322T143_NEG	0.78733	0.91636	0.9127	0.90374	0.90278
M411T298_NEG	0.92831	0.84772	0.83871	0.85572	0.85578
M300T26_NEG	0.22265	0.19952	0.1979	0.19617	0.20798
M97T34_NEG	0.67367	0.82874	0.81558	0.8095	0.80927
M675T431_NEG	0.4279	0.58754	0.64681	0.6486	0.64774
M575T446_NEG	0.89155	1.257	1.2346	1.2258	1.2232
M503T246_NEG	1.6722	1.4984	1.5189	1.5318	1.5273
M829T245_NEG	0.12596	0.68013	0.72547	0.7517	0.75831
M264T175_NEG	0.12592	0.27515	0.29276	0.29173	0.29131
M919T423_NEG	0.31442	0.65674	0.66574	0.65942	0.65783
M861T290_NEG	0.28614	0.62588	0.61455	0.70634	0.70485
M863T133_NEG	1.172	1.0771	1.0724	1.0824	1.0856
M553T391_NEG	0.59622	0.5326	0.58091	0.58629	0.59619
M238T43_NEG	1.4248	1.3273	1.3923	1.3798	1.3765
M139T159_NEG	0.98342	0.88224	0.86703	0.86628	0.86404
M350T152_2_NEG	0.3832	0.38205	0.38001	0.37872	0.37801
M179T15_NEG	0.7486	0.74011	0.74394	0.74111	0.74461
M709T450_NEG	0.75358	0.93829	0.93896	0.92975	0.92713
M565T163_NEG	0.58255	0.54063	0.54406	0.54916	0.54822
M707T329_NEG	0.91639	0.8771	0.8868	0.87982	0.88729
M359T154_NEG	1.2163	1.1442	1.1264	1.1172	1.1197
M420T187_NEG	1.4029	1.7867	1.7708	1.7652	1.7817
M273T273_NEG	0.53398	0.48286	0.47459	0.46997	0.46946
M565T368_NEG	0.022344	0.79255	0.80647	0.79878	0.80817
M237T188_NEG	1.8869	1.7381	1.718	1.7033	1.6993
M626T444_NEG	0.48279	0.7286	0.73236	0.75147	0.74925
M267T276_NEG	0.33098	0.43324	0.46402	0.4595	0.45815
M678T416_NEG	0.48657	0.44322	0.44861	0.45312	0.48149
M417T248_NEG	1.4414	1.2872	1.2761	1.2651	1.2614
M1119T394_4_NEG	0.16162	0.14545	0.16836	0.18646	0.1862
M587T356_1_NEG	1.054	1.0521	1.0331	1.0235	1.0207
M631T396_NEG	0.15683	0.17326	0.18487	0.25049	0.24976
M304T83_NEG	0.8004	0.8354	0.84278	0.837	0.83455
M275T46_NEG	0.074945	0.13753	0.15462	0.16015	0.15978
M259T774_NEG	1.07	0.9578	0.94124	0.93402	0.93127
M505T328_NEG	0.61776	0.6648	0.65413	0.68269	0.69735
M257T248_NEG	2.0983	1.8875	1.9055	1.8875	1.8822
M479T175_NEG	0.0014681	0.36382	0.38272	0.49242	0.49134
M233T70_NEG	0.49025	0.45949	0.45115	0.45139	0.45016
M220T43_NEG	1.3456	1.2315	1.2162	1.2082	1.2126
M183T774_NEG	0.15744	0.30315	0.3523	0.38587	0.38482
M735T391_NEG	0.71458	1.1173	1.1159	1.1122	1.1183
M511T148_NEG	0.13542	0.1294	0.12879	0.12847	0.12809
M171T45_NEG	0.21209	0.33536	0.32928	0.32892	0.33082
M172T26_NEG	0.32002	0.30329	0.305	0.30218	0.30392
M75T31_NEG	0.055908	0.58854	0.60418	0.59975	0.5983
M530T38_NEG	0.056893	0.051152	0.13997	0.14223	0.17251
M486T192_NEG	0.097012	0.37357	0.38404	0.39118	0.39085
M721T182_NEG	2.6852	2.6875	2.6679	2.6418	2.6341
M258T646_NEG	0.082694	0.10948	0.1551	0.16666	0.23453
M185T34_2_NEG	2.3718	2.4906	2.4479	2.427	2.4203
M787T228_NEG	0.072071	0.50567	0.5107	0.54721	0.56362
M837T376_NEG	0.47101	0.43591	0.48676	0.49055	0.49537
M391T291_NEG	0.50778	0.71467	1.0613	1.0594	1.0585
M669T250_NEG	0.70369	0.64392	0.65751	0.67386	0.67609
M335T417_NEG	0.10763	0.097026	0.1051	0.10903	0.10904
M858T509_NEG	0.57841	0.80406	0.80864	0.80384	0.8103
M239T301_NEG	0.10186	0.096593	0.097252	0.099862	0.10461
M597T372_NEG	0.18533	0.35702	0.3822	0.37965	0.38171
M581T304_NEG	0.38298	0.35458	0.35771	0.3574	0.35635
M684T410_NEG	0.61204	0.6228	0.61742	0.6196	0.62032
M320T183_NEG	0.40981	0.36599	0.36099	0.38072	0.38082
M374T140_NEG	1.1166	1.0358	1.0237	1.0142	1.0112
M395T236_NEG	2.7436	2.5904	2.5437	2.5187	2.5122
M319T168_NEG	0.72784	0.71339	0.71072	0.73064	0.72857
M619T208_NEG	0.37245	0.40415	0.4267	0.46081	0.49099
M665T294_NEG	2.3637	2.1622	2.1233	2.1063	2.1009
M152T645_1_NEG	0.44847	0.42334	0.41567	0.42404	0.4354
M317T252_NEG	0.88281	0.79119	0.80701	0.79934	0.79825
M612T190_NEG	1.7521	1.5885	1.5902	1.5851	1.5823
M350T356_NEG	0.048691	0.044892	0.044204	0.046873	0.046932
M263T248_NEG	0.34817	0.35465	0.39242	0.38866	0.39088
M889T485_NEG	0.53126	0.61132	0.60248	0.59884	0.59744
M541T358_2_NEG	3.9599	4.1705	4.0961	4.0653	4.0542
M837T283_NEG	0.36001	0.42098	0.4394	0.49948	0.49859
M719T362_NEG	1.0691	1.0188	1.0015	1.0006	0.9981
M473T306_NEG	0.48134	0.43528	0.42984	0.42809	0.42726
M642T431_NEG	0.90386	0.80959	0.80107	0.81742	0.81708
M631T452_NEG	1.0822	1.1587	1.1392	1.1309	1.1282
M695T391_NEG	0.35566	0.41905	0.49477	0.53126	0.52999
M519T220_NEG	0.58553	0.8165	0.81757	0.80965	0.80966
M175T770_NEG	0.44555	0.44453	0.43755	0.44403	0.44532
M479T268_NEG	0.39197	0.37097	0.36737	0.37219	0.37112
M840T493_NEG	2.2485	2.3076	2.2831	2.2938	2.287
M998T413_NEG	0.14835	0.20896	0.21618	0.21749	0.22725
M274T25_NEG	0.60174	0.56128	0.64696	0.65128	0.65524
M451T466_NEG	0.037525	0.034249	0.071292	0.076429	0.095223
M430T236_NEG	1.2868	1.3032	1.3052	1.305	1.3023
M269T176_NEG	1.1668	1.0612	1.0495	1.0393	1.0374
M259T751_NEG	0.64314	0.62493	0.63239	0.63433	0.63288
M274T58_NEG	1.4839	1.326	1.3424	1.3292	1.3283
M549T249_NEG	1.1783	1.0978	1.0882	1.081	1.0782
M444T168_NEG	2.1339	2.0664	2.0321	2.0122	2.0063
M554T390_NEG	0.19246	0.67275	0.66208	0.65694	0.6582
M385T123_NEG	0.099271	0.20953	0.20874	0.21418	0.21358
M859T502_NEG	0.079096	0.1191	0.1389	0.13778	0.14892
M178T15_NEG	0.84875	0.79733	0.79926	0.7978	0.79617
M175T737_NEG	0.40505	0.37606	0.46952	0.51382	0.51247
M151T151_NEG	1.0939	1.0174	0.99893	0.98936	0.98802
M133T656_1_NEG	0.36062	0.33265	0.34685	0.35224	0.3513
M449T330_NEG	0.18878	0.27952	0.37726	0.39332	0.39382
M248T47_NEG	0.20289	0.19773	0.32568	0.33021	0.32969
M466T275_NEG	1.2918	1.2255	1.2583	1.2485	1.2479
M197T24_NEG	0.65108	0.65089	0.63914	0.65578	0.65436
M871T499_NEG	0.22398	0.22892	0.22509	0.23822	0.24971
M422T164_NEG	0.27274	0.27801	0.27299	0.28818	0.28825
M911T495_NEG	0.38678	0.34608	0.36243	0.37583	0.37634
M717T210_NEG	0.87836	0.81143	0.83864	0.8521	0.85724
M131T35_NEG	0.40811	0.37178	0.38056	0.41291	0.42836
M509T318_NEG	0.12214	0.17345	0.30619	0.30896	0.30944
M281T67_NEG	1.218	1.2451	1.231	1.2302	1.2275
M938T412_NEG	0.64106	0.58369	0.57571	0.57342	0.57413
M99T57_NEG	0.65926	0.87317	0.87299	0.86482	0.86227
M363T159_NEG	1.4849	1.3374	1.3145	1.3027	1.2995
M656T207_NEG	0.47832	0.68551	0.74484	0.7681	0.7684
M1075T329_NEG	0.71366	0.85854	0.84836	0.84112	0.84888
M515T368_NEG	0.7263	0.79165	0.79335	0.79003	0.78848
M259T16_NEG	0.011388	0.3712	0.3726	0.37637	0.37579
M348T200_NEG	0.52076	0.48216	0.52769	0.61836	0.61661
M235T170_NEG	1.1757	1.0747	1.0672	1.0576	1.0577
M211T20_NEG	0.7395	0.69971	0.69256	0.70576	0.70406
M733T204_NEG	0.17995	0.1654	0.22685	0.32955	0.34617
M177T706_NEG	0.22752	0.20371	0.23218	0.23605	0.23559
M179T773_NEG	1.3096	1.2401	1.2176	1.2476	1.2472
M229T270_NEG	0.3547	0.35936	0.35284	0.35514	0.35641
M295T172_NEG	0.4864	0.47492	0.47685	0.48103	0.48147
M287T58_NEG	0.011177	0.13825	0.1361	0.13893	0.14027
M445T374_NEG	0.13253	0.11858	0.12575	0.12477	0.125
M983T223_NEG	0.6673	0.65512	0.79477	0.80725	0.82655
M350T181_NEG	0.75467	0.82807	0.82648	0.84839	0.8471
M911T205_NEG	0.81039	0.77506	0.8249	1.0348	1.032
M317T46_NEG	0.83528	0.74651	0.73516	0.74414	0.74324
M555T296_NEG	1.5279	1.3653	1.3408	1.3276	1.3271
M797T210_NEG	1.4555	1.3975	1.3898	1.3799	1.3803
M264T127_NEG	1.5078	1.4162	1.4293	1.4195	1.416
M462T161_NEG	0.6491	0.61018	0.67804	0.67188	0.67502
M305T59_NEG	0.34508	0.3098	0.31746	0.31744	0.35562
M209T20_NEG	0.34937	0.31199	0.30668	0.30903	0.30859
M673T304_NEG	1.136	1.0313	1.0547	1.1056	1.1033
M459T373_NEG	1.0863	1.1574	1.1553	1.1453	1.1494
M502T426_NEG	0.16027	0.27301	0.26945	0.27729	0.27676
M122T120_NEG	0.72842	0.78839	0.78246	0.7753	0.77904
M368T191_NEG	0.6931	0.62481	0.62972	0.62353	0.62552
M415T241_NEG	1.4046	1.3397	1.3352	1.3307	1.3275
M641T267_NEG	0.5918	0.60371	0.59907	0.59365	0.5933
M767T373_NEG	1.2092	1.1321	1.1282	1.1173	1.1145
M719T210_NEG	0.82031	0.75458	0.7753	0.78207	0.78827
M731T492_NEG	0.13291	0.28712	0.35229	0.35157	0.35078
M376T218_NEG	1.4272	1.3818	1.3677	1.3959	1.3918
M398T375_NEG	1.1215	1.0524	1.0336	1.0236	1.0255
M427T247_NEG	0.32715	0.29764	0.32191	0.32395	0.3239
M345T226_NEG	0.27461	0.24635	0.27725	0.27465	0.27384
M255T705_NEG	0.045775	0.5546	0.57398	0.62223	0.63398
M234T705_NEG	0.34223	0.33852	0.33331	0.3397	0.35041
M729T320_NEG	0.78023	0.70115	0.71761	0.71465	0.71504
M611T188_NEG	0.77987	0.74522	0.73261	0.74159	0.74493
M277T134_NEG	0.72261	0.64803	0.74475	0.76186	0.75961
M226T51_NEG	0.16814	0.23297	0.236	0.25279	0.25312
M545T213_NEG	0.11178	0.11953	0.21159	0.23338	0.23326
M509T279_NEG	1.3735	1.2858	1.2627	1.2582	1.2755
M435T24_NEG	1.9777	1.8085	1.787	1.7803	1.7751
M223T148_NEG	1.0414	0.9732	0.95883	1.0005	0.99761
M450T148_NEG	0.23974	0.26903	0.26418	0.26584	0.27239
M185T34_3_NEG	2.4292	2.4462	2.4108	2.3932	2.3864
M236T58_NEG	1.2132	1.157	1.2517	1.2407	1.2379
M533T368_NEG	0.21838	0.92696	0.91316	0.90762	0.90802
M432T162_NEG	1.0198	1.0762	1.1048	1.1123	1.1096
M1061T338_NEG	0.12664	0.16324	0.16326	0.1968	0.21497
M527T341_NEG	0.2556	0.2334	0.23355	0.29059	0.29078
M395T415_NEG	0.52425	0.4709	0.46374	0.46117	0.46011
M405T203_NEG	1.2387	1.1439	1.1406	1.1437	1.1403
M663T220_NEG	0.55145	0.49459	0.49273	0.55894	0.61837
M291T23_NEG	0.95909	1.0044	1.1321	1.1354	1.1325
M233T31_NEG	0.16585	0.16596	0.16305	0.16601	0.16596
M159T10_NEG	1.202	1.197	1.1762	1.1649	1.162
M520T191_NEG	0.31638	0.40127	0.41406	0.42017	0.4195
M256T307_NEG	0.8708	0.7794	0.77	0.76701	0.77747
M541T450_NEG	0.28924	0.52611	0.54856	0.57504	0.57381
M368T346_NEG	0.64921	0.58197	0.62311	0.61735	0.61603
M282T138_1_NEG	0.24926	0.22784	0.23037	0.22927	0.23074
M887T498_NEG	0.82745	1.0553	1.0379	1.028	1.0456
M179T26_NEG	0.42915	0.40153	0.44866	0.44426	0.44302
M359T43_NEG	0.10856	0.30506	0.35575	0.3593	0.3624
M386T186_NEG	0.56814	0.61713	0.63723	0.74595	0.74487
M253T693_NEG	0.43986	0.40206	0.39695	0.39325	0.39215
M233T12_NEG	0.20011	0.18451	0.18393	0.20935	0.21951
M243T332_NEG	0.11693	0.12539	0.14134	0.14321	0.1514
M945T460_NEG	0.27305	0.30081	0.31544	0.32965	0.32868
M529T369_NEG	0.75982	0.76752	0.79127	0.78533	0.79177
M169T27_NEG	0.69526	0.62706	0.61696	0.61378	0.61204
M340T34_NEG	0.22893	0.40394	0.39943	0.4155	0.42923
M157T90_NEG	1.5752	1.412	1.3911	1.3957	1.3955
M600T351_NEG	0.13678	0.47767	0.55307	0.55829	0.55833
M370T174_NEG	0.81123	0.72646	0.9085	0.90064	0.9021
M495T214_NEG	0.69992	0.73185	0.72024	0.71403	0.71243
M179T728_NEG	0.27909	0.54777	0.54492	0.553	0.55342
M557T486_NEG	2.681	2.4077	2.3662	2.3523	2.3457
M154T740_NEG	0.26316	0.23507	0.2322	0.23027	0.2375
M988T369_NEG	0.82039	0.7489	0.77006	0.76329	0.76137
M361T217_NEG	0.54378	0.58296	0.65901	0.67361	0.68539
M371T166_NEG	0.82426	0.93076	0.9142	0.90665	0.90476
M799T423_NEG	0.15939	0.19976	0.20915	0.20713	0.21015
M131T643_NEG	0.73213	0.73537	0.72459	0.71747	0.71544
M803T375_NEG	0.73621	0.65918	0.74685	0.7488	0.7571
M411T246_2_NEG	1.0193	0.99917	0.99352	0.98845	0.98565
M161T25_NEG	0.57139	0.51987	0.54663	0.54163	0.54332
M725T368_1_NEG	0.53747	0.67021	0.71323	0.75625	0.76724
M387T206_NEG	1.2571	1.146	1.3042	1.327	1.3231
M286T180_NEG	1.384	1.244	1.2247	1.2129	1.2095
M577T379_NEG	0.84675	0.87281	0.85957	0.85195	0.85116
M792T510_NEG	0.70622	0.74858	0.74678	0.74499	0.74324
M152T159_NEG	0.8011	0.83218	0.81708	0.83016	0.82772
M166T37_NEG	0.11703	0.11522	0.11343	0.13334	0.15101
M205T26_NEG	1.0858	0.97386	0.96009	0.95421	0.95246
M260T57_NEG	0.30093	0.351	0.35555	0.35241	0.35139
M430T167_NEG	1.0199	0.91311	0.9029	0.89465	0.89257
M535T181_NEG	0.62044	0.55689	0.54784	0.56317	0.56191
M97T58_NEG	0.83881	0.79107	0.78743	0.78454	0.78899
M469T291_2_NEG	0.34555	0.30866	0.3179	0.33353	0.33263
M831T384_NEG	0.80106	0.76953	0.78538	0.78191	0.78331
M366T34_1_NEG	0.21711	0.20929	0.20748	0.21917	0.22064
M234T764_NEG	0.55696	0.55407	0.54555	0.54029	0.53988
M195T135_NEG	0.34053	0.33152	0.32986	0.32831	0.32897
M99T691_NEG	1.6095	1.4376	1.4177	1.4048	1.401
M665T290_NEG	0.20312	0.59676	0.59822	0.59394	0.59227
M99T739_NEG	0.073364	0.10158	0.10305	0.12224	0.13593
M313T385_NEG	0.95191	0.94309	0.92615	0.92511	0.92306
M755T382_NEG	0.37116	0.58479	0.57957	0.57568	0.5746
M235T57_NEG	0.49916	0.45023	0.44206	0.43844	0.44008
M97T725_NEG	0.19061	0.2188	0.22014	0.25368	0.25395
M217T170_NEG	0.90774	1.0027	0.98588	0.97802	0.98067
M399T35_NEG	0.82648	1.0746	1.0551	1.0497	1.0553
M757T409_NEG	0.53443	0.47833	0.47	0.46539	0.46841
M99T714_NEG	0.52617	0.67942	0.6678	0.66291	0.66108
M389T291_NEG	0.019041	0.028143	0.11405	0.1923	0.19238
M235T277_NEG	1.9019	1.7765	1.7466	1.7297	1.7263
M498T363_NEG	0.60609	0.54398	0.53489	0.5805	0.57933
M407T376_NEG	0.83763	0.74979	0.80275	0.79494	0.79301
M99T768_NEG	0.10346	0.29791	0.31055	0.30756	0.32012
M547T168_NEG	0.96204	0.87986	0.88303	0.88459	0.88203
M321T253_NEG	1.7787	1.7394	1.7139	1.7028	1.6979
M267T357_NEG	0.43687	0.41486	0.40739	0.41528	0.41464
M783T498_1_NEG	1.7263	1.5896	1.5609	1.5537	1.5494
M136T159_NEG	0.67636	0.72775	0.71517	0.7321	0.73009
M473T229_NEG	0.58925	0.85546	0.90445	0.91895	0.91627
M267T366_NEG	0.52658	0.75598	0.74562	0.73854	0.74662
M455T409_NEG	0.029487	0.043978	0.043646	0.083379	0.089537
M214T170_NEG	0.075062	0.51513	0.50585	0.50908	0.51428
M465T372_NEG	0.014206	0.40838	0.40455	0.40085	0.40025
M267T168_NEG	0.30098	0.41233	0.42465	0.42075	0.41964
M295T46_NEG	0.074264	0.17394	0.19324	0.22299	0.22309
M413T58_NEG	0.6789	0.6194	0.62034	0.6916	0.71511
M97T763_NEG	0.11953	0.18003	0.17877	0.19304	0.19836
M329T199_NEG	0.1245	0.35117	0.38695	0.395	0.42551
M315T328_NEG	0.53864	0.48434	0.47742	0.50084	0.50153
M739T500_NEG	1.6454	1.4819	1.4632	1.4685	1.4643
M547T216_NEG	0.61169	0.54642	0.78386	0.91776	0.93448
M222T37_NEG	0.123	0.21724	0.21876	0.22407	0.23035
M319T736_NEG	0.39546	0.53838	0.52912	0.53689	0.5364
M293T24_NEG	0.62861	0.59069	0.58936	0.60666	0.60586
M857T448_NEG	0.65925	0.78111	0.76948	0.76369	0.76255
M669T368_NEG	0.37959	0.6845	0.74874	0.77699	0.78517
M664T206_NEG	1.7358	1.594	1.5835	1.5706	1.566
M727T184_NEG	0.97061	0.87378	0.87234	0.92046	0.92478
M352T163_NEG	0.56848	0.5365	0.53949	0.55847	0.55686
M316T58_NEG	0.53632	0.58213	0.59019	0.58837	0.58709
M413T386_NEG	0.15794	0.14296	0.14318	0.14241	0.14199
M593T184_NEG	0.47253	0.49203	0.48948	0.50478	0.5034
M535T159_NEG	0.90973	0.94683	0.95563	0.9722	0.96956
M208T58_NEG	0.39554	0.74107	0.76739	0.76082	0.77321
M351T646_NEG	0.82644	0.84587	0.8457	0.83743	0.83497
M297T168_NEG	0.000903	0.16671	0.17196	0.17485	0.18112
M885T225_NEG	0.12509	0.15292	0.48559	0.59772	0.60038
M619T374_NEG	0.42087	0.87042	0.86697	0.85845	0.85592
M319T768_NEG	0.64177	0.58814	0.58971	0.58879	0.5904
M269T704_NEG	0.20647	0.19716	0.20491	0.25075	0.25226
M255T248_NEG	0.42555	0.59219	0.58598	0.59313	0.59169
M185T26_NEG	1.2094	1.0822	1.0976	1.1078	1.1056
M381T409_NEG	0.33698	0.55733	0.54739	0.54214	0.54314
M379T287_NEG	0.89847	0.82074	0.82297	0.82119	0.81893
M553T355_NEG	1.4503	1.4446	1.4348	1.4256	1.4215
M545T322_NEG	0.036207	0.10653	0.13127	0.13199	0.13744
M451T236_NEG	1.5877	1.4404	1.4214	1.4111	1.4072
M517T201_NEG	1.1026	1.0806	1.0653	1.0575	1.0558
M619T391_NEG	1.1144	1.2479	1.2444	1.2368	1.2389
M315T670_NEG	0.66573	0.59497	0.58438	0.60346	0.60211
M127T105_NEG	0.37559	0.40577	0.40062	0.40027	0.39915
M313T714_NEG	0.59037	0.67209	0.69071	0.68393	0.68518
M294T62_NEG	0.76955	0.85922	0.84368	0.84399	0.84175
M311T503_NEG	0.79125	1.1757	1.1544	1.1503	1.152
M891T445_2_NEG	0.1503	0.66888	0.67454	0.66994	0.6685
M201T660_NEG	1.3601	1.3168	1.3026	1.2963	1.2955
M779T375_NEG	0.07789	0.22473	0.22361	0.24207	0.26015
M513T219_NEG	0.063714	0.58914	0.61191	0.65616	0.65444
M377T283_NEG	2.5217	2.6084	2.5624	2.5458	2.5415
M397T311_NEG	0.65085	0.64323	0.63156	0.63185	0.63206
M227T236_NEG	0.4595	0.46816	0.47526	0.47139	0.47489
M169T106_NEG	1.3946	1.3275	1.3133	1.3008	1.2978
M403T148_1_NEG	0.83787	0.75705	0.74343	0.73636	0.73894
M317T173_NEG	0.43242	0.45445	0.46008	0.49127	0.49704
M663T350_NEG	0.22901	0.82105	0.84164	0.83341	0.83902
M346T142_NEG	0.55481	0.70903	0.69803	0.70385	0.70301
M228T58_NEG	0.49839	0.44562	0.44301	0.45409	0.45281
M761T497_NEG	0.88471	0.79006	0.78243	0.77816	0.78081
M117T26_1_NEG	0.2509	0.32304	0.33666	0.33926	0.34011
M534T387_NEG	0.097591	0.83655	0.82171	0.81851	0.82122
M744T410_NEG	0.59477	0.63385	0.6355	0.63493	0.63307
M450T168_NEG	0.45202	0.4522	0.47676	0.48756	0.48648
M721T379_NEG	0.70346	0.91266	0.90445	0.89804	0.89545
M390T410_NEG	0.25779	0.43306	0.48768	0.48815	0.48706
M313T447_NEG	3.9826	4.1811	4.1054	4.0713	4.0635
M425T171_NEG	0.14557	0.33372	0.68805	0.6911	0.70469
M791T213_NEG	1.4559	1.3514	1.4343	1.4305	1.4263
M223T219_NEG	0.38839	0.53498	0.56842	0.56884	0.56737
M807T370_NEG	1.6792	1.5742	1.5673	1.5593	1.5681
M675T218_NEG	1.5239	1.398	1.3743	1.361	1.3586
M535T220_NEG	2.5051	2.5296	2.4837	2.4806	2.4733
M194T14_NEG	0.61781	0.58894	0.60156	0.59797	0.60182
M338T187_NEG	0.6166	0.6386	0.69459	0.74751	0.74861
M423T250_NEG	0.99875	0.93592	0.92006	0.92687	0.9261
M653T409_NEG	0.61282	0.61312	0.64071	0.63576	0.63417
M286T160_NEG	2.1914	1.9573	1.9222	1.9299	1.9247
M378T193_NEG	1.671	1.5916	1.5826	1.5865	1.5822
M199T768_NEG	1.3161	1.2015	1.1906	1.1793	1.1801
M753T482_NEG	1.2744	1.1392	1.1371	1.144	1.143
M673T347_NEG	0.71945	0.76012	0.7544	0.78458	0.78227
M425T298_NEG	1.8292	1.6417	1.6149	1.6029	1.6008
M153T26_NEG	0.57339	0.64696	0.6472	0.6454	0.64362
M445T168_NEG	1.5715	1.4392	1.4309	1.4316	1.4281
M401T148_NEG	0.099699	0.22109	0.22662	0.23488	0.23473
M303T164_NEG	0.5838	0.65014	0.67465	0.68776	0.69162
M184T169_NEG	0.35059	0.31309	0.33641	0.33855	0.33768
M244T98_NEG	0.42289	0.44838	0.44359	0.44381	0.44486
M545T241_NEG	0.13579	0.25752	0.66941	0.66479	0.68252
M211T235_NEG	2.3841	2.451	2.4118	2.3895	2.3825
M119T644_NEG	2.4085	2.4829	2.4395	2.4176	2.4122
M361T326_NEG	0.82163	0.74829	0.73482	0.75025	0.74926
M434T252_NEG	0.10499	0.1699	0.16705	0.16599	0.16551
M547T448_NEG	0.48845	0.67499	0.66311	0.65728	0.65594
M201T20_NEG	0.49492	0.51739	0.51347	0.51082	0.53342
M324T165_NEG	1.0827	0.97213	0.96413	0.95569	0.9538
M147T241_NEG	0.73346	0.66707	0.66255	0.6593	0.66546
M187T44_NEG	0.11801	0.15653	0.15412	0.2864	0.2879
M393T138_NEG	0.4748	0.49415	0.52038	0.60358	0.60367
M451T208_NEG	0.30141	0.27411	0.29498	0.3314	0.33464
M354T333_NEG	0.36773	0.35243	0.38465	0.38806	0.38913
M457T343_NEG	0.57253	0.71738	0.71344	0.73149	0.72967
M1001T329_NEG	1.7197	1.7153	1.7521	1.747	1.742
M310T144_NEG	1.8519	1.935	1.9058	1.888	1.8828
M242T153_NEG	1.046	0.98988	0.97762	0.97979	0.97817
M755T198_NEG	0.49544	0.54354	0.54172	0.57442	0.58689
M377T54_NEG	0.019424	0.019171	0.019105	0.018937	0.018881
M177T764_NEG	0.095921	0.17963	0.21553	0.21388	0.21332
M429T185_NEG	0.27379	0.26317	0.31418	0.31128	0.3104
M456T247_NEG	0.24649	0.26474	0.30601	0.3086	0.31081
M747T405_NEG	2.1309	2.1586	2.1198	2.1095	2.1033
M636T493_NEG	0.92413	0.94242	0.93406	0.92492	0.92418
M343T56_NEG	1.2039	1.1081	1.1055	1.0983	1.0991
M262T132_NEG	0.47942	0.42919	0.48186	0.47855	0.47723
M392T196_NEG	3.2773	2.972	2.9214	2.895	2.8868
M565T338_NEG	0.27749	0.25202	0.352	0.40323	0.41694
M304T60_NEG	1.1898	1.0912	1.0732	1.0627	1.0606
M541T209_NEG	1.4948	1.7561	1.7248	1.7406	1.7419
M304T167_NEG	0.30562	0.50964	0.50368	0.51591	0.53243
M197T58_NEG	0.78974	0.81973	1.084	1.1168	1.1137
M151T106_NEG	1.3662	1.3008	1.285	1.2731	1.2703
M1130T202_NEG	1.3305	1.2653	1.2425	1.2472	1.2435
M345T25_NEG	0.062126	0.12376	0.13063	0.14684	0.1488
M940T413_NEG	0.31895	0.5657	0.5633	0.56268	0.56607
M455T247_NEG	0.41104	0.66675	0.67592	0.67603	0.67809
M181T775_NEG	0.057697	0.17548	0.17399	0.22444	0.22883
M432T247_NEG	0.88472	0.84009	0.82527	0.81723	0.81487
M362T380_NEG	0.44035	0.67114	0.659	0.6819	0.68037
M390T24_NEG	0.74362	1.1115	1.169	1.1701	1.1666
M260T150_NEG	0.047181	0.061122	0.07524	0.081924	0.095891
M251T44_NEG	1.6496	1.5072	1.4799	1.466	1.4627
M332T128_NEG	0.15271	0.16545	0.16247	0.17606	0.2005
M449T381_NEG	2.697	2.8101	2.7622	2.7387	2.7369
M487T398_NEG	1.1734	1.1698	1.1506	1.1466	1.1458
M757T365_NEG	0.13703	0.40053	0.42372	0.42208	0.42211
M323T43_NEG	0.59311	0.53033	0.57399	0.56928	0.57178
M233T722_NEG	0.34853	0.77479	0.76075	0.76042	0.76041
M231T773_NEG	0.78046	0.75003	0.74079	0.73653	0.73441
M425T422_NEG	0.70605	0.70975	0.70519	0.69913	0.6984
M345T644_NEG	0.16629	0.83255	0.81786	0.81395	0.8141
M429T206_NEG	0.038844	0.081515	0.44011	0.43935	0.51126
M645T481_NEG	0.09045	0.37299	0.44124	0.44183	0.44299
M409T298_NEG	0.65606	0.61356	0.604	0.6053	0.60374
M793T372_NEG	0.18929	0.28864	0.32021	0.31766	0.31978
M260T35_NEG	0.17955	0.16975	0.1668	0.19526	0.19645
M490T236_NEG	0.71075	0.67835	0.68308	0.68609	0.68714
M237T12_NEG	0.83883	0.7792	0.7726	0.76861	0.76819
M553T253_NEG	0.48365	0.88588	0.88537	1.0134	1.0117
M814T460_NEG	1.4873	1.4132	1.3882	1.3886	1.3855
M345T196_NEG	0.25625	0.45715	0.49198	0.51653	0.5168
M871T269_NEG	0.54236	0.62343	0.61924	0.61992	0.61809
M826T509_NEG	0.25412	0.38069	0.39939	0.39773	0.39745
M297T363_NEG	3.8618	3.6402	3.5911	3.5692	3.5655
M224T60_NEG	0.8533	0.969	0.9592	0.95691	0.95656
M857T230_NEG	1.0121	0.93713	0.92174	0.99273	0.98982
M326T451_NEG	1.5953	1.4255	1.3998	1.3863	1.3835
M111T148_NEG	0.4785	0.51967	0.53807	0.5948	0.59503
M307T131_NEG	1.2537	1.1285	1.2034	1.2723	1.2689
M279T314_NEG	0.74633	0.68143	0.67999	0.67335	0.6739
M593T168_NEG	0.48923	0.45186	0.4457	0.44226	0.44147
M715T161_NEG	0.67753	1.2468	1.2267	1.2172	1.2166
M200T42_NEG	0.10226	0.091343	0.10231	0.10166	0.10137
M659T408_NEG	1.0964	1.0185	1.0036	0.99376	0.9932
M99T665_NEG	0.62931	0.60015	0.59013	0.58493	0.60439
M741T202_NEG	0.084102	0.31881	0.32985	0.45671	0.46034
M637T192_NEG	0.67743	0.89199	0.88696	0.92278	0.92056
M254T54_NEG	2.6516	2.3794	2.3416	2.3383	2.3314
M1015T276_NEG	0.4606	0.46925	0.47	0.48772	0.4864
M222T31_NEG	0.92258	0.9066	0.93571	0.92998	0.94984
M411T380_NEG	0.76907	0.70172	0.69074	0.68423	0.6983
M581T204_NEG	2.3901	2.2964	2.2949	2.2727	2.2661
M325T189_NEG	2.4099	2.1756	2.185	2.1694	2.1688
M441T252_NEG	0.17309	0.16124	0.2064	0.24713	0.24716
M175T698_NEG	0.19774	0.70095	0.712	0.71666	0.71959
M199T725_NEG	0.20636	0.18845	0.27198	0.31497	0.31495
M318T145_NEG	0.029151	0.026427	0.092736	0.096677	0.096461
M325T138_NEG	0.20344	0.27327	0.49741	0.50538	0.50524
M150T272_NEG	0.26248	0.60027	0.60849	0.60295	0.60293
M237T43_NEG	2.4444	2.1888	2.1876	2.1782	2.1735
M339T34_NEG	0.21995	0.21986	0.24179	0.23943	0.23919
M686T410_NEG	0.65076	0.66114	0.65445	0.64839	0.64707
M823T498_NEG	1.0608	1.3158	1.3167	1.3062	1.3025
M235T217_NEG	1.65	1.498	1.4755	1.4774	1.4841
M761T374_NEG	0.48649	0.45896	0.49791	0.49575	0.49926
M365T303_NEG	0.23489	0.26096	0.28482	0.28208	0.29409
M445T148_NEG	0.31205	0.77198	0.78688	0.82211	0.82133
M549T174_NEG	0.49812	1.0473	1.0781	1.1176	1.1283
M164T32_NEG	0.78056	0.74838	0.74426	0.74283	0.74097
M889T368_NEG	0.44799	0.67538	0.68822	0.68273	0.68081
M295T352_NEG	1.7317	1.5831	1.5557	1.5443	1.5522
M430T168_NEG	1.2832	1.1465	1.1376	1.129	1.1256
M845T498_NEG	1.6057	1.4683	1.4421	1.4377	1.4335
M317T225_NEG	0.61887	0.63901	0.62798	0.62682	0.62611
M379T147_NEG	1.1893	1.3316	1.4219	1.465	1.4615
M212T34_NEG	1.046	0.96089	0.96245	0.95509	0.9568
M817T489_NEG	0.66607	0.60231	0.63397	0.66634	0.66538
M377T171_NEG	0.78416	0.72491	0.71177	0.7053	0.70427
M789T482_NEG	1.5239	1.3631	1.3589	1.361	1.3591
M206T175_NEG	0.3686	0.32967	0.45396	0.53295	0.53825
M269T776_NEG	0.25682	0.32359	0.32298	0.32554	0.32459
M467T166_NEG	1.0548	0.95829	0.95492	0.97823	0.9758
M388T169_NEG	1.3724	1.2411	1.2805	1.2718	1.2681
M775T452_NEG	0.70448	0.9316	0.92559	0.91703	0.91538
M255T663_NEG	0.21495	0.43849	0.45512	0.45066	0.44954
M511T266_NEG	2.3161	2.4953	2.4507	2.4272	2.4279
M346T183_NEG	1.5859	1.4521	1.4258	1.4121	1.4091
M513T368_NEG	0.25609	0.36243	0.4081	0.42004	0.43475
M324T248_NEG	0.52114	0.4803	0.48011	0.47539	0.474
M391T337_NEG	0.54761	0.57906	0.75981	0.75988	0.76296
M241T23_NEG	0.50862	0.47479	0.46738	0.46333	0.46506
M509T262_NEG	0.89125	0.92145	0.90496	0.89735	0.89497
M819T257_NEG	0.89115	0.88244	0.86742	0.88624	0.93809
M505T246_NEG	1.3914	1.2487	1.293	1.3234	1.3202
M633T194_NEG	0.17107	0.21751	0.21359	0.2436	0.2429
M259T725_NEG	1.6303	1.5152	1.4983	1.4918	1.4889
M549T318_NEG	0.12486	0.40192	0.47048	0.46728	0.46695
M234T734_NEG	0.063649	0.062314	0.082811	0.090257	0.091035
M459T429_NEG	0.6539	0.93397	0.9171	0.92653	0.9238
M417T195_NEG	1.0409	1.0567	1.0388	1.0293	1.0264
M285T59_NEG	0.36456	0.3694	0.36547	0.37747	0.37635
M727T394_NEG	0.11294	0.35838	0.35476	0.35174	0.35122
M199T37_NEG	0.55946	0.50285	0.50836	0.50464	0.51154
M307T155_2_NEG	0.20701	0.2128	0.43453	0.43845	0.43733
M528T294_NEG	1.1677	1.1933	1.2101	1.2505	1.251
M281T59_NEG	0.8696	0.81491	0.80598	0.85949	0.85816
M220T162_NEG	0.19541	0.57561	0.62915	0.62871	0.62757
M187T33_NEG	0.14366	0.16539	0.16998	0.19116	0.19072
M187T130_NEG	1.4231	1.7628	1.7318	1.7205	1.7187
M721T431_NEG	0.33642	0.3852	0.40797	0.40413	0.40459
M1027T339_NEG	2.6589	2.8614	2.8409	2.8214	2.8176
M766T419_NEG	0.42311	0.64888	0.65136	0.64497	0.64311
M332T155_NEG	0.24034	0.23187	0.4219	0.43365	0.43527
M587T379_NEG	0.58892	0.53494	0.54073	0.53568	0.54702
M287T297_NEG	0.67716	0.60913	0.60752	0.60587	0.63562
M130T752_NEG	0.28942	0.30399	0.32353	0.33544	0.34125
M315T35_NEG	0.21631	0.40762	0.4012	0.41221	0.42079
M623T407_NEG	2.0391	1.8713	1.8473	1.8306	1.8295
M412T36_NEG	0.056623	0.14356	0.18354	0.22131	0.22495
M539T239_NEG	2.3577	2.1058	2.0708	2.0539	2.0486
M291T319_NEG	1.3852	1.4931	1.4681	1.454	1.4506
M293T41_NEG	0.12936	0.12953	0.15108	0.15008	0.15057
M423T188_NEG	0.12533	0.14792	0.15644	0.21623	0.21649
M490T247_NEG	0.30298	0.29973	0.31197	0.31001	0.31154
M397T326_NEG	0.49504	0.56862	0.57738	0.57876	0.58051
M311T447_NEG	1.0156	0.94077	0.93011	0.93185	0.92912
M563T339_NEG	0.10947	0.12239	0.14388	0.14267	0.14238
M305T308_NEG	0.93513	0.86701	0.85286	0.85899	0.85649
M823T398_NEG	0.11222	0.34175	0.33591	0.33598	0.335
M475T306_NEG	0.27536	0.24704	0.24371	0.24179	0.24211
M309T57_NEG	0.95778	0.94033	0.92949	0.92257	0.92164
M337T30_NEG	0.71839	0.93038	0.91514	0.9079	0.90655
M545T228_NEG	1.0137	0.91122	0.93571	0.93372	0.93096
M609T277_NEG	0.15231	0.17213	0.21205	0.22142	0.22318
M467T198_NEG	0.013038	0.54001	0.57456	0.56929	0.56982
M257T150_NEG	0.004129	0.67113	0.66047	0.65421	0.65305
M312T289_NEG	2.1399	2.125	2.0869	2.0678	2.0645
M284T144_NEG	0.27832	0.39495	0.40635	0.42785	0.42746
M238T180_NEG	0.81478	0.72785	0.71584	0.71114	0.70906
M129T217_NEG	1.7081	1.71	1.684	1.6675	1.6629
M562T436_NEG	0.76938	0.78617	0.7736	0.76644	0.7648
M387T233_NEG	1.6256	1.5557	1.5279	1.5129	1.5216
M717T259_NEG	1.1806	1.3561	1.3615	1.4226	1.4186
M82T120_NEG	0.30304	0.27108	0.33595	0.3684	0.38392
M211T665_NEG	0.63308	0.56554	0.5668	0.58655	0.58617
M83T32_NEG	0.16499	0.33862	0.34005	0.33772	0.33676
M143T643_NEG	0.045254	0.15968	0.1569	0.21972	0.22142
M287T97_NEG	0.34714	0.32304	0.3172	0.3143	0.31362
M586T307_NEG	0.18672	0.16758	0.32172	0.45064	0.48875
M835T490_NEG	0.5771	0.53414	0.52828	0.55103	0.54952
M383T151_NEG	0.15276	0.23235	0.25452	0.25262	0.25493
M509T350_NEG	0.96874	0.87941	0.88911	0.88224	0.87968
M606T451_NEG	0.13126	0.12508	0.12282	0.12787	0.12789
M709T498_NEG	2.2281	2.0218	1.9853	1.9669	1.9623
M1165T199_NEG	1.0057	1.0402	1.0214	1.0311	1.0285
M129T146_NEG	0.21951	0.31679	0.32045	0.36425	0.36409
M158T46_NEG	0.041248	0.22374	0.21999	0.22181	0.22274
M671T347_NEG	0.3368	0.3717	0.36569	0.38114	0.38063
M159T645_NEG	0.95788	1.0419	1.0273	1.0232	1.0207
M495T280_NEG	0.26733	0.23964	0.23576	0.2348	0.23468
M225T35_NEG	0.50736	0.64654	0.63629	0.63297	0.63769
M199T54_NEG	1.564	1.4076	1.3953	1.3857	1.3817
M755T213_NEG	1.4631	1.3494	1.4287	1.4263	1.4221
M345T303_NEG	1.1669	1.0619	1.0459	1.0516	1.0514
M461T169_NEG	1.1267	1.0161	1.0155	1.0058	1.0028
M829T498_NEG	1.1075	0.99225	0.99404	1.0179	1.0173
M181T710_NEG	0.1964	0.1953	0.21388	0.27977	0.29481
M855T257_NEG	0.59489	0.53206	0.52381	0.56531	0.59545
M924T501_NEG	0.26306	0.24967	0.2534	0.25181	0.26048
M523T158_NEG	1.6347	1.5543	1.5574	1.5503	1.5462
M355T225_NEG	0.53209	0.47516	0.46849	0.46481	0.46346
M374T306_NEG	0.0031465	0.2311	0.30907	0.30848	0.30867
M767T207_NEG	0.40391	0.39996	0.47902	0.47438	0.47664
M735T362_NEG	0.083251	0.56866	0.55858	0.55313	0.55181
M482T353_NEG	0.0095182	0.17399	0.17089	0.16959	0.17032
M361T192_NEG	1.8776	1.7016	1.683	1.6706	1.6657
M385T450_NEG	0.64127	0.71286	0.70944	0.70513	0.70472
M479T196_NEG	0.53643	0.8863	1.022	1.0341	1.0317
M421T371_NEG	2.18	1.9548	1.9236	1.9055	1.9012
M313T137_NEG	1.301	1.1741	1.1546	1.1448	1.1415
M132T741_NEG	0.28097	0.47879	0.49173	0.48722	0.48827
M659T374_NEG	0.55648	0.59116	0.59193	0.59456	0.59476
M829T230_NEG	0.18303	0.33797	0.33199	0.3378	0.33743
M986T514_NEG	0.48119	0.49152	0.48299	0.48023	0.48098
M287T321_NEG	0.2516	0.22479	0.22316	0.23572	0.23709
M469T257_NEG	1.5311	1.3736	1.359	1.3456	1.3417
M253T36_NEG	0.88651	0.98713	0.99056	1.0065	1.0114
M242T34_NEG	0.047458	0.11976	0.21413	0.21636	0.21585
M720T511_NEG	1.3226	1.1959	1.1784	1.181	1.1788
M585T178_NEG	0.20454	0.27469	0.27811	0.27647	0.28274
M300T158_NEG	0.54908	0.5371	0.53325	0.53113	0.5435
M313T221_NEG	0.51175	0.58683	0.58767	0.59012	0.59053
M313T56_NEG	3.6658	3.307	3.2731	3.2471	3.2378
M397T189_NEG	1.0602	0.95204	0.93974	0.93124	0.9325
M579T231_NEG	0.31265	0.45461	0.46794	0.47152	0.47064
M236T299_NEG	0.36437	0.85446	0.8445	0.87007	0.87013
M189T59_NEG	0.61255	0.55979	0.55671	0.57089	0.5693
M583T273_NEG	1.3098	1.3006	1.3146	1.3269	1.331
M177T712_NEG	0.80121	0.79359	0.77965	0.79356	0.81216
M795T421_NEG	0.72951	0.70724	0.69816	0.70805	0.70655
M351T329_NEG	0.9018	0.8137	0.79893	0.79828	0.80395
M605T294_NEG	1.3609	1.2313	1.2129	1.2136	1.215
M158T776_NEG	0.18702	0.29133	0.30935	0.30915	0.3174
M469T250_NEG	1.7217	1.5472	1.5694	1.5708	1.5689
M181T757_NEG	0.49655	0.572	0.5617	0.56152	0.56022
M199T165_NEG	0.61786	0.55801	0.58949	0.59577	0.59677
M401T288_NEG	0.76344	0.74474	0.78219	0.77489	0.78348
M414T169_NEG	0.82297	0.78145	0.77864	0.78368	0.78272
M601T338_NEG	0.00040186	0.23929	0.26868	0.32865	0.33652
M437T271_NEG	0.65337	0.58676	0.583	0.59454	0.60159
M337T387_NEG	0.16817	0.45917	0.49218	0.48915	0.49016
M130T778_NEG	0.88232	0.80386	0.80181	0.80964	0.80872
M371T357_NEG	1.6856	1.6263	1.5976	1.5845	1.58
M86T36_NEG	0.0024632	0.41759	0.41913	0.42335	0.42762
M145T53_NEG	1.182	1.5424	1.5162	1.5218	1.5189
M723T241_NEG	0.61074	0.54943	0.54399	0.53865	0.56275
M491T133_NEG	1.1637	1.061	1.0419	1.0561	1.0619
M895T449_NEG	0.44126	0.40361	0.43286	0.43337	0.43433
M425T24_NEG	0.019602	0.48556	0.57231	0.57611	0.58265
M299T225_NEG	0.49421	1.011	1.0307	1.0306	1.0369
M284T173_NEG	1.5859	1.4171	1.4002	1.3865	1.3833
M235T773_NEG	0.52531	0.52438	0.53712	0.53297	0.53524
M221T277_NEG	0.71026	0.685	0.67295	0.66644	0.67152
M381T205_NEG	0.66627	0.74425	0.74288	0.73557	0.73477
M445T196_NEG	0.41151	0.37619	0.37583	0.38485	0.38489
M716T497_NEG	0.070187	0.31952	0.32997	0.32674	0.32625
M318T315_NEG	0.18104	0.34824	0.36791	0.36434	0.3638
M538T194_NEG	0.57106	0.50998	0.50461	0.51379	0.51511
M298T132_1_NEG	0.40094	0.50258	0.51022	0.50847	0.50769
M269T36_NEG	2.6273	2.3623	2.3317	2.3513	2.3487
M269T747_NEG	0.16688	0.52855	0.53925	0.53736	0.53578
M441T182_NEG	0.81361	0.8131	0.80502	0.80622	0.80574
M515T168_NEG	1.6594	1.5579	1.5326	1.534	1.5301
M1031T334_NEG	1.3736	1.4186	1.3992	1.4128	1.4197
M571T209_NEG	1.5326	1.3732	1.3498	1.3493	1.3458
M583T262_NEG	1.0426	0.93954	1.0488	1.0401	1.0429
M471T217_NEG	1.4888	1.3538	1.3384	1.3254	1.3217
M312T74_NEG	1.4754	1.3319	1.3104	1.3064	1.3112
M783T238_NEG	0.26432	0.80135	0.78713	0.81619	0.81503
M59T763_NEG	1.1409	1.0234	1.0258	1.0354	1.0342
M346T147_NEG	1.1454	1.0247	1.0227	1.0152	1.0122
M941T204_NEG	0.52961	0.58222	0.68861	0.78299	0.7852
M777T426_NEG	0.64642	0.76975	0.7563	0.74886	0.74706
M244T45_NEG	0.099793	0.11039	0.22812	0.28431	0.28503
M373T253_NEG	0.33814	0.56488	0.67662	0.67057	0.68299
M236T664_NEG	1.1451	1.0868	1.0709	1.0707	1.068
M215T177_NEG	1.0681	1.0882	1.0685	1.0586	1.056
M443T374_NEG	0.72574	0.7555	0.74584	0.73897	0.73682
M293T647_NEG	1.2447	1.1225	1.1397	1.1286	1.1266
M215T117_NEG	0.88019	0.78713	0.77611	0.77049	0.76829
M215T55_NEG	1.0512	0.94377	0.92692	0.91832	0.91563
M151T159_NEG	0.93207	0.93187	0.91497	0.92445	0.92172
M423T298_NEG	1.161	1.1104	1.1083	1.1098	1.1112
M270T148_NEG	0.82109	0.7436	0.73253	0.72838	0.72889
M569T240_NEG	0.58603	0.77676	0.76303	0.75561	0.76983
M319T81_NEG	1.28	1.2966	1.3316	1.3199	1.3196
M782T490_1_NEG	1.4813	1.3237	1.3007	1.3085	1.3052
M336T366_NEG	1.0703	1.0267	1.0081	1.0016	1.0015
M559T374_NEG	0.93079	0.93233	0.92267	0.91388	0.9114
M710T561_NEG	1.3807	1.2752	1.265	1.2536	1.2499
M346T134_NEG	1.3136	1.1787	1.1617	1.1505	1.1474
M302T185_NEG	0.17939	0.16711	0.22187	0.30997	0.30996
M231T46_NEG	0.92577	0.84072	0.82669	0.86238	0.86202
M225T645_NEG	0.50282	0.67592	0.66618	0.6639	0.66527
M449T328_NEG	1.2857	1.5316	1.5083	1.4999	1.4959
M517T491_NEG	0.47828	0.48107	0.49185	0.50338	0.50337
M269T322_NEG	1.0144	0.9836	0.9908	0.98149	0.98036
M323T165_NEG	1.7095	1.5995	1.5725	1.5577	1.5564
M308T33_NEG	0.23347	0.28015	0.29444	0.29573	0.29509
M215T143_NEG	2.1174	1.9329	1.8985	1.8803	1.8779
M97T691_NEG	0.44061	0.39473	0.39297	0.39868	0.3996
M733T445_NEG	0.32758	0.55636	0.54925	0.54404	0.54634
M375T215_NEG	0.84413	0.78791	0.7759	0.76827	0.76677
M258T46_NEG	1.1017	0.99846	1.035	1.055	1.0521
M895T330_NEG	1.8567	1.7698	1.752	1.7557	1.7546
M341T340_NEG	0.051657	0.054165	0.053751	0.053233	0.053381
M864T456_NEG	0.31932	0.51352	0.55335	0.57248	0.57575
M773T232_NEG	0.92326	0.9919	1.0149	1.005	1.0098
M271T148_NEG	0.86641	0.80811	0.79346	0.7862	0.78467
M239T664_NEG	0.49176	0.44288	0.44765	0.46553	0.47071
M753T238_NEG	0.48496	0.87324	0.85893	0.86597	0.86365
M293T173_NEG	1.5988	1.4383	1.4206	1.4439	1.4424
M592T362_NEG	0.34067	0.33595	0.36498	0.3706	0.37151
M59T693_NEG	1.1712	1.1062	1.0864	1.0758	1.0761
M121T38_NEG	0.28579	0.93916	0.93532	0.93925	0.93934
M324T164_NEG	1.3823	1.2585	1.2366	1.2397	1.2387
M883T419_NEG	0.29674	0.27944	0.29143	0.28903	0.295
M319T704_NEG	0.28031	0.318	0.37643	0.37652	0.37832
M411T202_NEG	1.8691	1.7914	1.772	1.761	1.7561
M353T146_NEG	0.94011	0.83955	0.82437	0.81766	0.81594
M338T165_NEG	0.40812	0.37705	0.40045	0.39797	0.39724
M443T249_NEG	1.1626	1.0682	1.2016	1.1908	1.1971
M1018T456_NEG	0.59548	0.7753	0.76139	0.75922	0.75761
M377T168_1_NEG	0.82667	0.81049	0.84025	0.83655	0.83834
M342T193_NEG	1.202	1.2586	1.2587	1.2834	1.2816
M763T334_NEG	0.9666	1.2371	1.2146	1.219	1.2155
M179T170_NEG	0.28644	0.42499	0.4173	0.4136	0.41559
M200T33_NEG	0.34519	0.31749	0.31209	0.33948	0.33853
M505T316_NEG	1.0911	0.98382	0.96793	0.96864	0.96717
M375T225_NEG	0.30399	0.27736	0.31866	0.32095	0.32387
M607T294_NEG	1.3327	1.2143	1.2076	1.2179	1.219
M405T376_1_NEG	0.91343	0.83004	0.86006	0.85371	0.85124
M362T152_NEG	0.62746	0.56285	0.59258	0.59579	0.5961
M507T186_NEG	0.2485	0.32493	0.32197	0.33883	0.35071
M509T188_NEG	0.8511	0.81358	0.80663	0.81598	0.81952
M685T268_NEG	0.0036026	0.47009	0.49285	0.49082	0.52525
M549T204_NEG	0.83425	1.1853	1.2127	1.2029	1.2079
M189T39_NEG	0.32234	0.32012	0.39672	0.40204	0.41145
M235T729_NEG	0.78876	1.2305	1.227	1.2316	1.23
M689T335_NEG	0.49272	0.4458	0.4598	0.45557	0.45659
M671T233_NEG	0.51562	0.51226	0.66845	0.66191	0.66082
M303T55_2_NEG	1.9969	1.7989	1.811	1.7973	1.7923
M769T207_NEG	0.46863	0.47447	0.53585	0.53379	0.53601
M175T37_NEG	1.7115	1.5325	1.5048	1.49	1.4861
M319T670_NEG	1.7195	1.6186	1.5926	1.585	1.5813
M806T166_NEG	0.59799	0.56946	0.5894	0.58431	0.58332
M89T653_NEG	0.51984	0.49229	0.4918	0.52003	0.52396
M73T26_NEG	0.56972	0.57514	0.5771	0.5749	0.57705
M253T747_NEG	1.117	1.1921	1.1885	1.1771	1.1744
M863T219_NEG	1.2876	1.1848	1.1695	1.2306	1.2302
M156T696_NEG	0.49857	0.56071	0.55565	0.60561	0.62317
M313T244_NEG	0.52697	0.51006	0.53388	0.5481	0.56413
M501T374_NEG	0.49937	0.83928	0.82634	0.81845	0.81614
M221T183_NEG	1.0239	0.97971	1.0311	1.0314	1.0578
M953T495_NEG	0.57047	0.56613	0.63484	0.68193	0.68886
M391T131_NEG	0.37675	0.49058	0.51811	0.51315	0.51343
M169T37_NEG	0.83997	0.75318	0.74858	0.81637	0.84301
M171T316_NEG	0.90264	0.82546	0.82463	0.83002	0.82961
M466T150_NEG	1.3704	1.2727	1.2496	1.2546	1.2527
M228T39_NEG	1.232	1.2564	1.2336	1.2253	1.2218
M303T46_NEG	0.41629	0.627	0.65682	0.65911	0.65993
M343T35_NEG	0.76554	0.70486	0.73169	0.76056	0.7598
M353T646_NEG	0.67251	0.60754	0.59654	0.59076	0.59031
M531T293_NEG	1.2074	1.1201	1.1248	1.12	1.1178
M224T58_NEG	1.1027	0.99363	0.97639	0.97018	0.96746
M232T143_NEG	0.12424	0.24709	0.33337	0.33733	0.33654
M257T59_NEG	0.29459	0.45433	0.44921	0.44704	0.44676
M481T507_NEG	0.25022	0.23167	0.2697	0.26705	0.27392
M253T716_NEG	0.41451	0.41979	0.41486	0.41231	0.42485
M553T454_NEG	0.13197	0.49997	0.49828	0.52193	0.52039
M871T438_NEG	0.010699	0.27602	0.27133	0.27	0.26924
M241T26_NEG	0.072359	0.17683	0.18303	0.18157	0.18106
M259T172_NEG	0.97374	0.95584	0.93851	0.95928	0.9576
M391T264_NEG	1.0347	1.1204	1.1672	1.1563	1.1532
M591T284_NEG	0.23805	0.24107	0.3353	0.33296	0.34071
M373T129_NEG	0.43589	0.40238	0.39533	0.39569	0.39524
M357T246_NEG	0.79087	0.78687	0.77564	0.76914	0.76748
M366T171_NEG	1.1759	1.0506	1.0929	1.0925	1.0933
M793T429_NEG	0.49087	0.68424	0.68075	0.67406	0.67272
M284T131_NEG	1.0051	0.99508	1.0186	1.009	1.0061
M257T179_NEG	0.87745	0.85931	0.85582	0.87573	0.87336
M995T471_NEG	0.8567	0.89532	0.88301	0.8844	0.88756
M284T147_NEG	0.5012	0.49966	0.51571	0.52329	0.52213
M257T700_NEG	1.156	1.0513	1.0484	1.0462	1.0435
M269T14_NEG	0.23082	0.35738	0.35779	0.38539	0.38855
M232T168_NEG	0.79968	0.71421	0.705	0.69831	0.6978
M369T645_NEG	0.17191	0.68801	0.68051	0.6744	0.67241
M332T144_NEG	1.1422	1.0937	1.0788	1.0692	1.0664
M337T299_NEG	0.64257	0.58105	0.57053	0.56492	0.56998
M424T409_NEG	0.30175	0.41088	0.4058	0.41337	0.41613
M407T120_NEG	0.68789	0.61815	0.61195	0.606	0.6129
M783T398_NEG	0.2638	0.40535	0.41522	0.41164	0.41047
M603T467_NEG	0.81627	0.83129	0.83342	0.82543	0.82347
M216T34_2_NEG	0.2972	0.51754	0.50816	0.5126	0.51142
M455T366_NEG	1.0534	1.3218	1.3044	1.2984	1.2951
M223T116_NEG	1.3372	1.2473	1.252	1.246	1.2452
M974T361_NEG	1.5861	1.4369	1.4109	1.3973	1.3956
M488T236_NEG	0.60432	0.5518	0.55559	0.55808	0.56245
M881T270_NEG	0.63226	0.58499	0.59922	0.60688	0.63569
M911T491_NEG	0.87303	0.91272	0.93648	0.92925	0.93033
M371T167_NEG	1.6985	1.607	1.5852	1.5925	1.5884
M435T183_NEG	0.42662	0.39214	0.40027	0.40097	0.39992
M175T42_NEG	0.24313	0.21778	0.21789	0.21902	0.21881
M882T413_NEG	0.44492	0.39759	0.39655	0.39481	0.39772
M156T744_NEG	0.33269	0.51028	0.50242	0.49963	0.50615
M130T723_NEG	0.80736	0.86371	0.87516	0.89552	0.89339
M791T206_NEG	0.26041	0.8808	1.1345	1.1234	1.1242
M599T272_NEG	0.708	0.65492	0.7019	0.75152	0.76167
M213T262_NEG	0.80125	0.73524	0.72591	0.72308	0.72099
M477T170_NEG	1.278	1.1933	1.1756	1.1877	1.1844
M455T473_NEG	0.59321	0.67735	0.66587	0.65936	0.65777
M678T449_NEG	0.66751	0.6027	0.5944	0.60265	0.62637
M239T368_NEG	0.2755	0.40107	0.41935	0.41537	0.41429
M401T410_NEG	1.6189	1.4612	1.4358	1.4423	1.4381
M417T364_NEG	0.61905	0.58886	0.5832	0.58867	0.58757
M703T429_NEG	3.3204	3.6007	3.5355	3.5102	3.5003
M352T165_NEG	0.85813	0.80781	0.96594	0.97235	0.97025
M571T200_NEG	0.5042	0.48344	0.48736	0.50121	0.49984
M229T664_NEG	0.057539	0.18986	0.19084	0.19633	0.1975
M887T392_NEG	0.38643	0.61667	0.60579	0.60218	0.60046
M133T656_2_NEG	0.96398	0.91241	0.90192	0.8941	0.90256
M419T364_NEG	0.38152	0.37665	0.38203	0.39434	0.39466
M277T31_NEG	1.0729	0.97404	0.95866	0.9504	0.94793
M319T19_NEG	0.27979	0.40961	0.40443	0.40158	0.42383
M174T37_NEG	1.0022	0.90458	0.9015	0.90574	0.90358
M801T482_NEG	0.5891	0.64614	0.72879	0.72768	0.72729
M177T247_NEG	2.9886	2.79	2.7866	2.762	2.7539
M274T65_NEG	0.90807	0.81644	0.82588	0.8178	0.81612
M318T41_NEG	0.22646	0.22711	0.23536	0.23553	0.24062
M261T168_NEG	0.82423	0.79678	0.81192	0.8247	0.82226
M213T669_NEG	1.5764	1.6093	1.609	1.6096	1.608
M304T310_NEG	1.0297	0.93466	0.93449	0.92659	0.92465
M616T305_NEG	0.16444	0.59746	0.60059	0.6001	0.60531
M348T152_NEG	0.22002	0.28477	0.28321	0.28195	0.28163
M591T356_NEG	0.63969	0.64014	0.62852	0.62288	0.6227
M799T217_NEG	1.5562	1.3901	1.3685	1.4136	1.4125
M800T480_NEG	2.153	1.9616	1.9279	1.9137	1.9082
M435T180_NEG	0.5091	0.82811	0.83011	0.82913	0.8269
M680T432_NEG	0.43826	0.39883	0.45067	0.48569	0.49543
M661T200_NEG	0.10245	0.21285	0.21853	0.2172	0.21661
M415T187_NEG	0.65949	0.59458	0.61773	0.6185	0.61911
M264T33_NEG	1.4358	1.2849	1.2803	1.2693	1.2677
M663T200_NEG	0.73163	0.65675	0.64525	0.639	0.63737
M301T132_NEG	0.16052	0.48902	0.48035	0.47919	0.48119
M453T153_NEG	2.0283	1.8145	1.8036	1.8083	1.8074
M421T340_NEG	0.20037	0.25371	0.28417	0.28138	0.2806
M799T475_NEG	0.43463	0.67078	0.68915	0.69985	0.69782
M463T227_NEG	1.3281	1.2318	1.2121	1.2415	1.2379
M397T351_NEG	1.218	1.203	1.1812	1.1717	1.1683
M236T113_NEG	0.07616	0.4238	0.47969	0.4779	0.47784
M369T390_NEG	0.56791	0.6047	0.61268	0.61353	0.62779
M269T171_NEG	3.9416	3.6882	3.6941	3.6581	3.6498
M637T196_NEG	3.8422	3.5664	3.5404	3.5056	3.4953
M411T35_NEG	0.30191	0.54675	0.54192	0.53963	0.54681
M543T231_NEG	0.76728	0.73633	0.72415	0.71703	0.71533
M499T222_NEG	1.6004	1.5935	1.5676	1.5523	1.5484
M467T191_NEG	1.9418	1.7344	1.8109	1.8217	1.8163
M185T54_NEG	0.7905	0.71657	0.72279	0.74595	0.74391
M1136T254_NEG	1.3696	1.2324	1.2239	1.2229	1.2209
M139T26_NEG	0.44934	0.40133	0.40527	0.40545	0.40507
M195T186_NEG	0.62615	0.57936	0.57015	0.56461	0.56313
M360T317_NEG	1.0549	1.0785	1.0711	1.0633	1.0602
M355T195_NEG	1.5493	1.3864	1.4858	1.5167	1.5125
M259T771_NEG	0.69522	0.86487	0.85684	0.84954	0.85089
M869T517_NEG	0.14088	0.14693	0.14538	0.14397	0.14711
M368T499_NEG	0.8831	0.79357	0.77925	0.78151	0.77943
M267T166_NEG	0.1196	0.52908	0.52001	0.51674	0.51724
M187T26_NEG	0.096181	0.33189	0.35839	0.40621	0.40741
M647T356_NEG	1.9012	1.8532	1.8222	1.8042	1.8
M665T301_NEG	0.64323	0.5782	0.67497	0.67043	0.67024
M132T778_NEG	0.24231	0.39429	0.38841	0.38839	0.40345
M371T292_NEG	0.15302	0.44239	0.43448	0.437	0.43659
M157T52_NEG	0.53414	0.51109	0.52414	0.53608	0.53494
M201T229_NEG	0.098245	0.11164	0.16977	0.16892	0.17016
M216T39_NEG	1.4439	1.3206	1.3073	1.3012	1.3028
M593T368_NEG	0.49413	0.44229	0.44301	0.43879	0.43995
M185T57_NEG	0.018435	0.0792	0.11686	0.126	0.13607
M403T216_NEG	0.01459	0.093698	0.13119	0.13039	0.17131
M557T193_NEG	0.38612	0.56845	0.56999	0.62609	0.62445
M757T175_NEG	1.3491	1.2077	1.1858	1.1827	1.1795
M675T391_NEG	0.62686	0.87991	0.87763	0.87964	0.88012
M497T166_NEG	0.053136	0.46699	0.5564	0.55314	0.55162
M701T248_NEG	1.5902	1.5488	1.5304	1.5154	1.5113
M103T26_NEG	0.24837	0.24767	0.31604	0.31888	0.32207
M697T450_NEG	0.60056	0.53634	0.52831	0.52513	0.52482
M705T264_NEG	0.0076283	0.19717	0.23026	0.22801	0.23333
M667T207_NEG	0.39973	1.0659	1.1763	1.1649	1.1615
M328T649_NEG	0.21746	0.21519	0.27928	0.30357	0.31073
M184T61_NEG	1.0124	1.0333	1.0467	1.0383	1.0593
M278T47_NEG	0.1688	0.17705	0.29448	0.29437	0.29356
M231T29_NEG	1.189	1.0995	1.084	1.1103	1.1113
M533T176_NEG	0.60409	1.1216	1.111	1.1185	1.1152
M433T153_NEG	1.6977	1.5161	1.4913	1.4922	1.4909
M265T157_NEG	0.28779	0.64267	0.6939	0.74839	0.74631
M187T36_NEG	0.31613	0.55162	0.54162	0.54705	0.54748
M1195T497_NEG	0.51997	0.46897	0.46066	0.48298	0.48465
M405T337_NEG	0.87608	0.80116	0.79127	0.78689	0.78547
M189T35_2_NEG	1.6413	1.4734	1.456	1.4428	1.4386
M249T160_NEG	1.2401	1.2165	1.2329	1.2582	1.2564
M316T644_NEG	0.048994	0.1394	0.2198	0.22211	0.22594
M551T213_NEG	0.66281	0.59736	0.63971	0.64275	0.64085
M213T26_NEG	0.08896	0.14043	0.14355	0.1477	0.14875
M229T45_NEG	0.50832	0.45629	0.4659	0.50521	0.54385
M391T208_NEG	0.85462	0.78792	0.83443	0.8275	0.82926
M239T59_1_NEG	0.06566	0.62759	0.61664	0.61715	0.61645
M665T350_NEG	0.86559	0.95253	0.98055	0.9785	0.97578
M344T155_NEG	0.31482	0.28508	0.31964	0.33889	0.33817
M545T159_NEG	0.93514	0.86064	0.87394	0.86604	0.86348
M377T66_NEG	0.085988	0.26301	0.26151	0.26402	0.27366
M459T162_NEG	0.1521	0.42366	0.42049	0.41953	0.41914
M152T304_NEG	0.27627	0.25862	0.25786	0.37603	0.38209
M613T224_NEG	0.41752	0.45028	0.53783	0.54309	0.55709
M379T146_NEG	1.0302	0.93349	0.92108	0.91496	0.91237
M172T140_NEG	0.15716	0.22985	0.24735	0.35938	0.35832
M414T356_NEG	1.9449	1.9177	1.8833	1.8654	1.8602
M437T218_NEG	1.7128	1.63	1.6372	1.6226	1.6179
M692T258_NEG	1.5063	1.4333	1.433	1.4192	1.4507
M237T759_NEG	0.44611	0.46738	0.49862	0.53742	0.53588
M595T157_NEG	1.2663	1.188	1.1825	1.1732	1.1876
M105T28_NEG	0.3633	0.32506	0.34184	0.34992	0.34895
M181T738_NEG	0.47077	0.74528	0.73915	0.7319	0.73559
M453T324_NEG	0.37234	0.49414	0.5039	0.50114	0.5007
M306T164_NEG	1.2814	1.1935	1.2564	1.2499	1.2577
M380T175_1_NEG	0.36535	0.94061	1.1126	1.1052	1.1169
M201T26_NEG	0.4519	0.83975	0.83628	0.83054	0.83181
M737T374_NEG	0.30506	0.62126	0.62296	0.61846	0.61716
M518T368_NEG	0.19736	0.912	0.91034	0.90668	0.9232
M535T350_NEG	0.2012	0.19019	0.19065	0.19126	0.19239
M519T262_NEG	2.3712	2.213	2.1734	2.1531	2.1469
M553T353_NEG	0.20586	0.25594	0.25414	0.25492	0.25418
M546T374_NEG	0.39707	0.49462	0.48805	0.48472	0.48394
M727T359_NEG	0.48982	0.6618	0.65917	0.65443	0.65399
M379T165_NEG	0.87867	1.1982	1.4848	1.4733	1.4823
M455T176_NEG	0.46936	0.50161	0.49617	0.51283	0.51466
M390T157_NEG	0.37658	0.45356	0.48522	0.48142	0.4936
M770T484_NEG	1.2325	1.1831	1.1667	1.1568	1.1539
M271T26_NEG	0.070608	0.40972	0.47428	0.48505	0.48693
M924T323_NEG	0.74327	0.73622	0.76277	0.77764	0.78251
M271T210_NEG	0.087157	0.88616	1.0408	1.0311	1.0296
M826T293_NEG	0.98716	1.092	1.0855	1.0777	1.0754
M337T25_NEG	0.037437	0.094193	0.1992	0.20743	0.21266
M413T283_NEG	1.3017	1.1636	1.1478	1.1413	1.1382
M315T25_NEG	0.091741	0.38767	0.42498	0.42875	0.42748
M183T663_NEG	1.1198	1.2005	1.1833	1.1771	1.1896
M409T235_NEG	2.6488	2.8175	2.7787	2.7514	2.7434
M331T169_NEG	0.3509	0.32658	0.34105	0.35965	0.35884
M527T478_NEG	0.25258	0.3123	0.31044	0.3092	0.31097
M671T254_NEG	1.2107	1.1005	1.1491	1.149	1.1457
M202T21_NEG	0.62392	0.57121	0.57896	0.57587	0.57969
M791T461_NEG	0.1056	0.27907	0.28457	0.28213	0.28158
M309T138_NEG	1.4421	1.3826	1.4415	1.4279	1.4238
M259T700_NEG	0.21407	0.20153	0.21338	0.26109	0.26132
M253T277_NEG	2.0196	1.8473	1.8184	1.8005	1.7953
M114T643_NEG	0.1473	0.14207	0.17007	0.16841	0.16838
M320T310_NEG	1.0341	0.92383	0.91802	0.91142	0.91084
M775T489_NEG	0.63562	0.59009	0.61771	0.6319	0.63009
M393T358_NEG	1.1305	1.0276	1.2324	1.222	1.2214
M159T162_NEG	1.7471	1.646	1.6285	1.6191	1.6149
M59T652_NEG	0.013303	0.012839	0.020033	0.063397	0.086282
M721T375_NEG	0.47377	0.51382	0.52331	0.52124	0.52161
M212T60_NEG	0.29273	0.26655	0.29953	0.29767	0.29948
M591T490_NEG	0.29502	0.77153	0.75981	0.82899	0.83162
M125T150_NEG	0.58935	0.53675	0.53151	0.53529	0.53512
M563T319_NEG	0.13247	0.26555	0.26893	0.2729	0.28558
M237T715_NEG	0.261	0.23349	0.25108	0.25077	0.25166
M795T190_NEG	1.0923	1.0712	1.0526	1.0432	1.0428
M883T460_NEG	0.52901	0.57005	0.56026	0.56165	0.56107
M239T351_NEG	0.21947	0.20549	0.20215	0.22705	0.22788
M411T220_NEG	0.83283	0.74594	0.74433	0.74492	0.74388
M611T271_NEG	1.2964	1.2091	1.191	1.1812	1.1792
M441T254_NEG	0.35341	0.36432	0.35879	0.35691	0.35682
M251T655_NEG	0.80387	0.73988	0.72645	0.72362	0.72464
M345T278_NEG	0.086856	0.31501	0.32503	0.32298	0.32296
M83T56_NEG	0.39874	0.36112	0.35699	0.36557	0.37196
M579T325_NEG	0.085827	0.11163	0.12424	0.12479	0.12446
M503T374_NEG	1.2394	1.2836	1.2679	1.2588	1.2551
M345T135_NEG	0.068829	0.16147	0.20784	0.22338	0.22304
M551T196_NEG	0.28546	0.44935	0.48312	0.51887	0.52533
M755T503_NEG	0.4515	0.61438	0.61053	0.60513	0.60531
M856T323_NEG	0.98408	0.9549	1.0111	1.0595	1.0672
M653T351_NEG	0.089581	0.25509	0.31596	0.32101	0.3201
M278T149_NEG	0.80486	0.79217	0.86437	0.86204	0.86181
M470T372_NEG	0.98802	0.92086	0.91865	0.9162	0.91416
M255T18_NEG	0.5219	0.47991	0.49497	0.51166	0.54549
M715T256_NEG	2.0777	2.163	2.1538	2.1376	2.1337
M203T644_NEG	0.59711	0.55225	0.54317	0.53806	0.54449
M568T198_NEG	0.99926	1.0215	1.0059	1.0663	1.0644
M255T46_NEG	0.75373	0.69183	0.69008	0.70759	0.70701
M417T166_NEG	0.17749	0.28261	0.31338	0.42954	0.4388
M777T460_NEG	0.055942	0.517	0.5079	0.50431	0.50692
M193T40_NEG	0.81402	0.73437	0.72858	0.72351	0.77789
M349T297_NEG	0.23061	0.53732	0.57222	0.61268	0.6111
M577T226_NEG	0.31101	0.28396	0.27967	0.30317	0.30262
M253T772_NEG	0.14702	0.2344	0.28569	0.3	0.29958
M243T294_NEG	0.57276	0.61655	0.60736	0.6064	0.605
M365T157_NEG	0.75199	0.7867	0.85866	0.86118	0.86219
M307T186_NEG	0.18945	0.59282	0.58706	0.58897	0.58763
M431T329_NEG	1.1308	1.06	1.0439	1.0364	1.0334
M251T31_NEG	0.51233	0.49513	0.49204	0.48833	0.48745
M375T202_NEG	0.36996	0.43041	0.51696	0.52684	0.5279
M581T504_NEG	0.51636	0.58929	0.59836	0.59516	0.59656
M779T362_NEG	0.76039	0.70682	0.69881	0.71238	0.7103
M272T48_NEG	0.36924	0.70512	0.71944	0.73793	0.73868
M385T57_NEG	1.2405	1.1119	1.093	1.1122	1.114
M317T232_2_NEG	1.0566	1.2385	1.2181	1.2103	1.2326
M181T15_NEG	1.1065	1.0645	1.0475	1.0756	1.0865
M204T155_NEG	1.3106	1.2222	1.2064	1.1961	1.1932
M721T435_NEG	0.18795	0.48589	0.47713	0.47685	0.47612
M98T37_NEG	0.44936	0.49494	0.48897	0.49446	0.49363
M755T362_NEG	1.3303	1.2219	1.2096	1.1979	1.195
M771T382_NEG	0.92971	0.90676	0.89878	0.89046	0.88791
M457T195_NEG	2.7635	2.6878	2.6499	2.6245	2.6167
M802T459_NEG	0.67222	0.71556	0.75049	0.75762	0.75645
M235T13_NEG	0.35046	0.34246	0.33916	0.34505	0.34699
M385T202_NEG	0.43245	0.76191	0.74809	0.75338	0.75187
M539T341_NEG	0.38107	0.3458	0.44264	0.44102	0.44631
M164T12_NEG	0.3549	0.40712	0.40802	0.40401	0.4034
M561T374_NEG	0.48491	0.60435	0.59775	0.59456	0.59335
M539T286_NEG	0.42449	0.38011	0.62945	0.63691	0.67918
M457T246_NEG	0.39662	0.39161	0.53051	0.58932	0.59546
M880T412_NEG	0.18623	0.27834	0.27987	0.28377	0.29848
M209T26_NEG	0.76798	0.75272	0.74246	0.75533	0.75315
M171T261_NEG	1.9086	1.736	1.7075	1.693	1.6882
M387T35_NEG	1.1175	0.99885	1.0166	1.0544	1.0524
M787T249_NEG	1.7301	1.5994	1.5718	1.5651	1.5605
M855T297_NEG	0.13266	0.53356	0.6391	0.68655	0.69847
M695T266_NEG	0.14893	0.52195	0.53121	0.5271	0.54455
M154T514_NEG	0.37352	0.59225	0.58205	0.57821	0.57941
M277T768_NEG	0.20922	0.18918	0.19061	0.22561	0.23644
M281T144_NEG	0.58705	0.83883	0.83053	0.82403	0.82214
M443T218_NEG	1.5722	1.5718	1.5885	1.5731	1.5685
M213T21_NEG	0.023663	0.089694	0.13626	0.13493	0.13517
M201T46_NEG	0.33707	0.39324	0.4198	0.45327	0.46187
M294T35_NEG	0.91819	0.84921	0.83445	0.83126	0.82881
M395T188_NEG	1.5825	1.7184	1.7346	1.7177	1.7132
M209T40_NEG	0.19482	0.23701	0.23704	0.23839	0.23782
M366T157_NEG	0.79584	0.72467	0.71816	0.71231	0.71188
M326T167_NEG	0.71545	0.6432	0.63939	0.63457	0.63271
M495T391_NEG	1.2979	1.1796	1.1777	1.1672	1.1762
M195T37_NEG	0.54168	0.48388	0.52521	0.57528	0.59387
M478T372_NEG	1.4054	1.7555	1.7305	1.7161	1.7115
M187T34_NEG	0.87907	0.78707	0.77565	0.78468	0.78357
M221T148_NEG	0.13174	0.20264	0.20746	0.23512	0.23549
M369T164_NEG	0.40664	0.42939	0.47646	0.47208	0.49699
M513T437_NEG	0.21456	0.19166	0.1882	0.1873	0.1869
M331T62_NEG	0.2307	0.26206	0.25731	0.25491	0.2542
M759T398_NEG	0.46647	0.71819	0.70855	0.70158	0.70366
M583T418_NEG	3.8746	4.0949	4.022	3.9934	3.9816
M271T23_NEG	0.17868	0.15958	0.15826	0.17517	0.17504
M321T166_NEG	0.63618	0.61337	0.60538	0.61903	0.62017
M554T240_NEG	1.2322	1.3145	1.3255	1.3191	1.3167
M237T644_NEG	0.10878	0.43341	0.45941	0.46952	0.46867
M156T514_NEG	0.23921	0.26262	0.25857	0.2696	0.28982
M739T210_NEG	0.76535	0.69992	0.70902	0.71693	0.7165
M519T221_NEG	1.0256	0.91772	0.90479	0.93343	0.93131
M353T321_NEG	0.032971	0.23528	0.27379	0.27618	0.27542
M405T202_NEG	0.24612	0.62678	0.61759	0.62989	0.6349
M619T481_NEG	2.2187	2.1405	2.1106	2.0961	2.0906
M505T385_NEG	0.30095	0.27633	0.2738	0.27583	0.27502
M319T191_NEG	1.5818	1.43	1.611	1.6291	1.6243
M413T488_NEG	1.6126	1.5257	1.5152	1.5074	1.5031
M239T336_NEG	0.080978	0.074468	0.076003	0.075273	0.075051
M354T179_NEG	1.9318	1.7789	1.7556	1.7723	1.7681
M308T135_NEG	0.38225	0.37227	0.36703	0.40762	0.40962
M418T165_NEG	2.1807	2.0248	2.0013	1.9817	1.9765
M59T729_NEG	0.3661	0.63063	0.6878	0.68173	0.67972
M247T34_NEG	1.1486	1.0728	1.056	1.0459	1.0428
M453T150_NEG	0.7846	0.72881	0.71602	0.7113	0.71034
M251T168_NEG	0.8681	1.5705	1.5437	1.5402	1.5356
M279T60_NEG	1.1192	1.0637	1.0533	1.0931	1.0909
M499T401_NEG	0.85491	0.92646	0.92214	0.91462	0.91207
M917T463_NEG	0.28257	0.56023	0.5519	0.54811	0.54651
M567T190_NEG	0.37822	0.42969	0.43788	0.50846	0.50699
M293T368_NEG	0.20669	0.227	0.22301	0.22083	0.22154
M267T139_NEG	0.67251	0.68079	0.67488	0.67044	0.67243
M299T31_NEG	0.0091054	0.54914	0.53945	0.53427	0.53276
M311T164_NEG	0.4491	0.63159	0.62289	0.61888	0.61747
M507T237_NEG	0.36277	0.34322	0.34402	0.3479	0.3471
M257T665_NEG	0.27648	0.37522	0.39505	0.42785	0.42943
M759T454_NEG	1.2325	1.4523	1.4331	1.4193	1.4169
M387T374_NEG	0.0043968	0.28346	0.35032	0.34762	0.34779
M177T666_NEG	0.27043	0.24323	0.27076	0.29174	0.32509
M677T260_NEG	0.18828	0.2483	0.78572	0.78456	0.78439
M819T295_NEG	0.099474	0.54432	0.7223	0.72175	0.71963
M657T241_NEG	1.7577	1.5701	1.5421	1.5276	1.524
M488T374_NEG	1.161	1.205	1.1845	1.1733	1.1698
M277T456_NEG	0.30164	0.56296	0.57757	0.60525	0.60624
M247T163_NEG	0.4765	0.44421	0.46515	0.47738	0.47604
M395T339_NEG	0.78188	0.70214	0.69213	0.68532	0.68504
M641T489_NEG	1.3989	1.3377	1.3208	1.311	1.3122
M762T412_NEG	0.10806	0.24086	0.28599	0.28318	0.30469
M534T214_NEG	1.767	1.5846	1.5558	1.5405	1.5362
M454T247_NEG	0.43014	0.38481	0.46089	0.45662	0.45697
M757T226_NEG	0.16632	0.32668	0.38752	0.40529	0.40411
M203T36_NEG	0.65251	0.6274	0.61966	0.61361	0.6259
M202T29_NEG	0.61312	0.62625	0.64999	0.64365	0.64253
M431T152_NEG	0.95014	0.86399	0.84904	0.84427	0.84204
M227T135_NEG	0.6666	0.64094	0.64128	0.68209	0.69742
M955T501_NEG	0.67434	0.75398	0.74435	0.73982	0.75165
M651T213_NEG	0.48674	0.43793	0.4873	0.48802	0.48658
M399T139_NEG	1.0813	1.0442	1.029	1.0653	1.0727
M239T29_NEG	0.30554	0.32098	0.32548	0.34097	0.35439
M737T256_NEG	0.81312	1.2508	1.2609	1.2547	1.2543
M367T162_NEG	1.5411	1.3942	1.3696	1.3685	1.3681
M219T171_NEG	0.087853	0.29902	0.42336	0.47542	0.47625
M331T645_NEG	0.5457	0.50949	0.50277	0.50295	0.5037
M323T173_NEG	3.0385	3.1041	3.0478	3.0252	3.0221
M488T185_NEG	0.49393	0.51928	0.51074	0.50863	0.50769
M487T435_NEG	1.4941	1.3524	1.3279	1.3243	1.3223
M465T344_NEG	2.1184	1.9705	1.9409	1.9256	1.9308
M573T291_NEG	0.093104	0.08758	0.10252	0.1658	0.16765
M139T148_1_NEG	0.085805	0.5384	0.57139	0.62201	0.62702
M348T166_NEG	0.13894	0.14003	0.2314	0.22927	0.22872
M503T265_NEG	0.74781	0.86056	0.9823	0.99166	0.99129
M445T313_NEG	0.007556	0.044351	0.043956	0.043548	0.10583
M835T223_NEG	0.25339	0.24152	0.4674	0.55047	0.55357
M357T26_NEG	0.99647	1.0717	1.0601	1.0496	1.0507
M330T42_NEG	0.091558	0.084147	0.083143	0.082483	0.082587
M287T339_NEG	0.062645	0.13393	0.17452	0.18889	0.19703
M323T178_NEG	1.2773	1.2076	1.1858	1.1759	1.1754
M554T412_NEG	0.53896	0.62417	0.61307	0.60731	0.62185
M139T148_2_NEG	0.60524	0.8101	0.80962	0.85774	0.85521
M355T161_NEG	2.7908	2.5955	2.5495	2.5576	2.5521
M330T771_NEG	0.61272	0.60096	0.5915	0.58709	0.58598
M573T205_NEG	0.010744	0.42559	0.44004	0.45578	0.48524
M824T412_NEG	0.063899	0.20283	0.21854	0.2204	0.25527
M425T236_2_NEG	0.50749	0.63763	0.68742	0.68523	0.69698
M829T249_NEG	1.1106	1.1094	1.1088	1.0981	1.0949
M255T665_NEG	0.78201	0.74916	0.74192	0.73773	0.73556
M330T752_NEG	0.48031	0.54033	0.53176	0.52653	0.5314
M721T268_NEG	0.22365	0.47389	0.49428	0.49273	0.53334
M760T498_NEG	0.065786	0.46454	0.461	0.50787	0.51509
M551T391_NEG	0.98974	0.9141	0.92258	0.92134	0.9273
M259T730_NEG	0.082789	0.15585	0.15373	0.27195	0.27143
M685T257_NEG	1.2198	1.1601	1.1757	1.282	1.2792
M295T153_NEG	1.0126	1.0294	1.046	1.0357	1.034
M177T663_NEG	0.60289	0.60223	0.59562	0.59228	0.59075
M412T218_NEG	1.9114	1.7801	1.7492	1.7591	1.7539
M523T435_NEG	2.1097	1.894	1.8597	1.8518	1.8485
M62T345_NEG	0.81742	1.0061	1.0112	1.0013	0.99865
M285T134_NEG	2.1816	2.2979	2.2569	2.2376	2.2367
M511T188_NEG	1.0522	0.96255	0.94508	0.9358	0.93413
M623T233_NEG	0.83092	0.76683	0.84085	0.84452	0.84328
M455T277_NEG	0.38145	1.3688	1.3898	1.3813	1.3774
M281T277_NEG	0.20536	0.23094	0.23544	0.2408	0.24182
M851T498_NEG	1.1429	1.3601	1.3456	1.336	1.3401
M179T663_NEG	0.43012	0.39766	0.46072	0.47432	0.47844
M274T67_NEG	1.232	1.1005	1.0914	1.0809	1.0804
M370T490_NEG	0.71281	0.6759	0.67145	0.66484	0.66319
M537T192_NEG	0.50847	0.52843	0.56195	0.56814	0.56704
M256T646_NEG	1.6483	1.5285	1.5074	1.4929	1.4885
M214T59_NEG	0.054355	0.17566	0.18188	0.18126	0.18352
M777T508_NEG	1.3418	1.2219	1.1997	1.1928	1.1896
M346T57_2_NEG	0.48502	0.49543	0.48803	0.49293	0.496
M799T399_NEG	0.30211	0.36678	0.3644	0.36087	0.36057
M281T177_NEG	1.8339	1.6414	1.6133	1.5975	1.5928
M617T219_NEG	1.3315	1.4594	1.4335	1.4295	1.4319
M259T47_NEG	0.60763	0.54889	0.54411	0.54178	0.5418
M271T186_NEG	0.16771	0.31185	0.38264	0.40849	0.41291
M305T57_NEG	1.2109	1.0859	1.0962	1.09	1.087
M265T186_NEG	0.36222	0.32347	0.31928	0.31909	0.31896
M317T205_NEG	1.992	1.7906	1.8723	1.8541	1.856
M307T155_3_NEG	0.1577	0.14926	0.37582	0.46336	0.46299
M193T156_NEG	0.95998	0.87257	0.90783	0.90066	0.91905
M443T470_NEG	0.80865	1.1235	1.1033	1.1001	1.0972
M186T84_NEG	1.3534	1.3132	1.3035	1.2908	1.287
M357T291_NEG	0.10437	0.09374	0.22388	0.23138	0.23123
M146T72_NEG	0.77442	1.0099	0.99627	0.9866	0.98373
M483T158_NEG	0.54967	0.57002	0.64132	0.6502	0.6483
M687T207_NEG	0.47862	0.44492	0.46224	0.49358	0.49232
M231T26_NEG	0.94917	0.86429	0.85337	0.84571	0.848
M335T178_NEG	0.76639	0.75116	0.75066	0.74626	0.74535
M230T34_NEG	0.79656	0.79123	0.7794	0.78843	0.78617
M843T517_NEG	0.3721	0.65577	0.65273	0.65548	0.65554
M368T412_NEG	0.45255	0.52867	0.51961	0.51516	0.52774
M332T718_NEG	2.0028	1.8922	1.8579	1.8398	1.8355
M337T243_NEG	1.6048	1.6056	1.5851	1.572	1.5673
M549T201_NEG	1.1237	1.0036	1.0173	1.0073	1.0053
M479T279_NEG	0.24157	0.25001	0.43741	0.4404	0.44282
M186T59_NEG	4.4387	4.185	4.1111	4.0767	4.0703
M285T343_NEG	0.094793	0.10941	0.12826	0.15386	0.15498
M637T201_NEG	4.2464	4.0515	4.016	3.9765	3.9652
M261T664_NEG	0.46187	0.53684	0.528	0.52631	0.53279
M72T31_NEG	0.058479	0.14216	0.13962	0.2287	0.25956
M227T134_NEG	0.69036	0.67009	0.68754	0.73876	0.74459
M310T131_NEG	0.01381	0.13156	0.26381	0.26571	0.27038
M665T368_NEG	0.12742	0.57617	0.64919	0.66946	0.6974
M433T173_NEG	1.3	1.2313	1.209	1.1971	1.1969
M273T68_NEG	0.52176	0.47967	0.51036	0.51446	0.51327
M249T654_NEG	0.90924	0.81212	0.79809	0.7918	0.78993
M599T379_NEG	0.58984	0.78471	0.80478	0.79697	0.80549
M357T238_NEG	1.5787	1.4166	1.4216	1.4136	1.4097
M316T635_NEG	0.27884	0.46421	0.48225	0.49306	0.50159
M165T310_NEG	0.44897	0.8902	0.87414	0.89823	0.90795
M237T131_NEG	0.26256	0.31731	0.34218	0.38114	0.38133
M511T211_NEG	0.36702	1.3007	1.2827	1.2825	1.2817
M325T499_NEG	0.058989	0.072141	0.075562	0.12381	0.12597
M194T180_NEG	0.62304	0.56032	0.55845	0.56439	0.56273
M447T144_NEG	0.62712	0.56516	0.55494	0.57531	0.57366
M112T36_NEG	0.10796	0.31151	0.31865	0.32847	0.3323
M479T176_NEG	2.8747	2.5672	2.5233	2.5214	2.5195
M383T303_NEG	1.0096	0.90193	1.0679	1.0692	1.0665
M349T59_NEG	0.084558	0.2989	0.2956	0.29378	0.30552
M541T157_NEG	0.16065	0.40225	0.41569	0.4126	0.42969
M272T145_NEG	2.15	2.1247	2.0932	2.0752	2.0692
M597T268_NEG	0.32114	0.30798	0.30515	0.30264	0.3134
M719T375_NEG	0.58706	0.70569	0.70263	0.69662	0.69838
M221T220_NEG	0.43095	0.38487	0.38582	0.40672	0.41176
M421T168_NEG	0.078696	0.206	0.55097	0.57602	0.57494
M663T257_NEG	0.57523	0.81715	0.86289	0.85711	0.85647
M507T251_NEG	3.0934	2.7645	2.7203	2.6968	2.6918
M261T181_NEG	0.45353	0.47426	0.50226	0.55554	0.56932
M822T412_NEG	0.079977	0.23562	0.2446	0.24537	0.26141
M143T252_NEG	0.076641	0.23808	0.23619	0.23974	0.24604
M549T218_NEG	0.59971	0.64375	0.65273	0.65873	0.664
M749T447_NEG	0.20246	0.73622	0.75731	0.77503	0.77539
M320T143_NEG	0.44036	0.46194	0.51616	0.51663	0.5364
M300T170_NEG	0.4534	0.41811	0.435	0.50601	0.50526
M288T160_NEG	2.3802	2.1302	2.0918	2.0905	2.0851
M353T154_NEG	0.14999	0.19884	0.19645	0.19823	0.20271
M333T311_1_NEG	0.0867	0.28132	0.35728	0.35493	0.35396
M231T180_NEG	0.17736	0.22659	0.49702	0.58801	0.58713
M179T353_NEG	0.27556	0.33779	0.3381	0.33639	0.34739
M579T266_NEG	2.4531	2.1946	2.1559	2.136	2.1297
M863T479_NEG	0.33525	0.47259	0.46454	0.46489	0.46881
M391T189_NEG	0.39734	0.35605	0.35655	0.36418	0.36408
M330T722_NEG	0.38739	0.53126	0.63164	0.64092	0.63916
M320T384_NEG	2.247	2.0283	1.9923	1.9808	2.0031
M195T36_NEG	0.51851	0.51122	0.50895	0.50429	0.50381
M205T57_NEG	0.52981	0.65726	0.67321	0.66818	0.66622
M229T29_NEG	1.1006	1.0599	1.0464	1.0409	1.0407
M739T289_NEG	0.59231	0.65607	0.69217	0.73273	0.74121
M693T348_NEG	0.24385	0.35042	0.41084	0.40733	0.40628
M577T303_NEG	1.2906	1.1623	1.1528	1.1675	1.164
M429T187_NEG	0.7413	0.82318	0.80829	0.81781	0.81605
M454T236_NEG	1.2198	1.3322	1.3196	1.3067	1.3039
M207T215_NEG	0.28077	0.65036	0.64118	0.63631	0.63452
M255T158_NEG	0.46997	0.60633	0.59542	0.58999	0.5894
M745T244_NEG	0.071916	0.44238	0.43531	0.47996	0.4795
M739T306_NEG	1.1221	1.2634	1.2416	1.2319	1.2357
M338T36_NEG	0.071626	0.45996	0.45167	0.45646	0.46159
M220T277_NEG	2.2771	2.1271	2.091	2.0705	2.0648
M567T255_NEG	0.48871	0.43812	0.43032	0.46001	0.4597
M112T26_NEG	0.90496	1.0779	1.0765	1.066	1.0648
M856T475_NEG	1.3441	1.362	1.3394	1.3268	1.3229
M294T169_1_NEG	0.42186	0.42886	0.61378	0.62727	0.6369
M263T169_NEG	1.4842	1.5084	1.4952	1.5023	1.4984
M1157T203_NEG	0.21384	0.70992	0.71704	0.71041	0.72609
M603T278_NEG	0.16561	0.67975	0.66754	0.67265	0.67179
M405T135_NEG	0.67043	0.68808	0.71167	0.70475	0.70378
M687T375_NEG	0.62439	0.55822	0.55255	0.5472	0.54689
M343T341_NEG	0.079211	0.1389	0.13665	0.14272	0.1805
M404T39_NEG	0.013977	0.091518	0.10437	0.10626	0.1072
M503T235_NEG	0.32284	1.2711	1.2802	1.2859	1.2822
M242T236_NEG	1.6966	1.5261	1.5084	1.5424	1.5382
M617T391_NEG	0.81461	1.1047	1.1033	1.0983	1.1043
M975T339_NEG	2.0295	1.9331	1.9373	1.9491	1.9462
M697T408_2_NEG	0.4043	0.48371	0.47562	0.47271	0.4736
M599T404_NEG	3.379	3.6389	3.5742	3.5502	3.5398
M349T221_NEG	0.43947	0.50754	0.50897	0.52459	0.52947
M857T223_NEG	0.24592	0.22088	0.43792	0.51546	0.5235
M719T372_NEG	0.35095	0.41333	0.40702	0.40666	0.40582
M557T190_NEG	0.26772	0.32237	0.34821	0.37394	0.37558
M393T204_NEG	0.6969	0.65401	0.66981	0.69177	0.69045
M415T333_NEG	1.117	1.5309	1.5104	1.4965	1.4952
M330T191_NEG	0.16171	0.24609	0.2585	0.26338	0.26683
M156T778_NEG	1.0583	1.0817	1.0646	1.0542	1.0517
M285T394_NEG	1.4402	1.3061	1.2829	1.2727	1.269
M375T64_NEG	0.387	0.45449	0.45045	0.45005	0.45032
M574T195_NEG	0.48073	0.50603	0.51817	0.51856	0.54646
M227T167_2_NEG	0.36419	0.59993	0.58969	0.58722	0.58585
M637T365_NEG	0.20516	0.18321	0.18762	0.30942	0.30859
M154T696_NEG	0.15453	0.14182	0.14062	0.16784	0.17296
M144T36_NEG	0.84201	0.7746	0.77164	0.7659	0.76447
M267T82_NEG	0.89873	0.87956	0.89256	0.88639	0.88541
M532T198_NEG	0.67468	0.68585	0.67569	0.73828	0.73682
M473T188_NEG	0.1153	0.61765	0.65093	0.67194	0.67247
M233T89_NEG	1.8309	1.6465	1.6229	1.6219	1.6205
M239T669_NEG	0.43284	0.49466	0.49405	0.48919	0.48873
M799T249_NEG	0.069958	0.45771	0.45756	0.45334	0.45949
M626T410_NEG	0.29727	0.3814	0.37678	0.37329	0.37338
M158T744_NEG	0.065586	0.43462	0.58165	0.60081	0.59913
M342T186_NEG	1.0099	0.91432	0.89915	0.90371	0.90245
M451T343_NEG	0.031435	0.078831	0.14233	0.15107	0.16338
M475T356_NEG	1.0537	1.0816	1.0629	1.0528	1.0519
M195T657_NEG	0.47361	0.59801	0.60156	0.61009	0.6083
M367T391_NEG	1.8613	1.793	1.7624	1.7505	1.7455
M298T132_2_NEG	0.19454	0.73613	0.73745	0.73035	0.73217
M114T644_NEG	1.0165	0.93486	0.91981	0.91092	0.90857
M343T319_NEG	1.8313	1.8445	1.8149	1.8028	1.7978
M227T40_NEG	0.66379	0.75592	0.74353	0.73748	0.73774
M463T431_NEG	1.8412	1.7877	1.7553	1.7384	1.7334
M188T164_NEG	0.76741	0.72357	0.72135	0.71426	0.713
M393T291_NEG	0.27778	0.25164	0.25715	0.27629	0.27599
M803T243_NEG	0.39101	0.34937	0.58632	0.61599	0.61443
M368T144_1_NEG	1.6477	1.4743	1.4476	1.4341	1.4305
M419T253_NEG	0.83625	0.7547	0.77878	0.77178	0.77321
M419T374_NEG	0.22556	0.38904	0.3999	0.40229	0.40649
M225T155_NEG	0.42108	1.1822	1.1611	1.1542	1.1538
M332T156_NEG	1.4274	1.3068	1.317	1.3288	1.3257
M389T334_NEG	0.511	0.82815	0.86554	0.85812	0.85768
M299T170_NEG	0.27731	0.27131	0.26656	0.35672	0.35876
M445T281_NEG	0.0037013	0.29105	0.28899	0.32971	0.32903
M399T391_NEG	0.52627	0.60769	0.62104	0.625	0.62727
M325T481_NEG	1.0059	1.0177	1.0189	1.0264	1.0285
M160T154_NEG	1.2624	1.1533	1.1417	1.1321	1.1292
M477T149_NEG	0.82203	0.76084	0.74805	0.74323	0.74197
M307T25_NEG	0.805	0.81071	0.79867	0.81251	0.8104
M1095T486_NEG	0.1353	0.15907	0.21327	0.23954	0.24987
M695T408_NEG	1.0708	0.99583	0.98193	0.97231	0.97196
M558T463_NEG	2.8685	2.7182	2.6697	2.6457	2.642
M338T647_NEG	0.028886	0.21695	0.2488	0.2489	0.26085
M103T33_NEG	1.1335	1.2047	1.1843	1.1728	1.176
M395T178_NEG	0.58759	0.63935	0.63438	0.62832	0.62647
M515T213_NEG	0.040673	0.54474	0.57316	0.60141	0.60008
M174T42_NEG	0.07841	0.97895	1.0502	1.0456	1.0467
M377T225_NEG	0.08313	0.31296	0.30996	0.3374	0.33982
M742T408_NEG	0.98589	0.90053	0.90098	0.8948	0.89496
M405T149_NEG	2.7692	2.6034	2.5564	2.5329	2.5328
M843T482_NEG	0.17205	0.26855	0.26796	0.26536	0.26606
M349T57_NEG	0.62041	0.55482	0.57101	0.59768	0.59726
M253T449_NEG	4.1427	4.392	4.3136	4.2769	4.2682
M371T131_NEG	0.52132	0.52247	0.51896	0.53199	0.53093
M537T368_NEG	0.80272	0.71927	0.70721	0.72261	0.72338
M341T252_NEG	0.83405	0.79616	0.80177	0.79391	0.79318
M777T444_NEG	0.59003	0.76397	0.75085	0.74348	0.74228
M397T252_2_NEG	0.12744	0.28785	0.28419	0.31978	0.32277
M379T190_NEG	1.4767	1.3388	1.3148	1.3575	1.3535
M701T132_NEG	2.3097	2.134	2.0963	2.0784	2.0792
M203T148_NEG	0.34009	0.4667	0.46133	0.54964	0.55111
M577T211_NEG	0.1545	0.13985	0.29931	0.36959	0.36855
M549T230_NEG	0.60626	0.54308	0.7011	0.70129	0.701
M411T142_NEG	0.37613	0.35874	0.37062	0.36854	0.36772
M277T159_NEG	1.0291	0.92289	0.91458	0.95717	0.95757
M330T243_NEG	0.78968	0.89327	0.88119	0.88056	0.87971
M111T28_NEG	0.19024	0.19699	0.19746	0.20299	0.20389
M235T23_NEG	1.1689	1.0783	1.0739	1.0777	1.0745
M219T30_NEG	0.18093	0.16193	0.2299	0.22844	0.23149
M755T229_NEG	0.092824	0.54139	0.54537	0.56761	0.56639
M245T39_NEG	0.28348	0.2704	0.29824	0.31068	0.31665
M247T655_NEG	0.43709	0.39462	0.39049	0.40272	0.41721
M565T414_NEG	0.98486	0.87979	0.90665	0.90867	0.90656
M395T142_NEG	1.681	1.511	1.5852	1.5955	1.5928
M237T770_NEG	0.36695	0.36356	0.42471	0.4642	0.46325
M445T311_NEG	0.18041	0.26019	0.25777	0.30743	0.30768
M318T133_NEG	0.62613	0.57057	0.56675	0.57004	0.56837
M339T241_NEG	2.8161	2.7205	2.6724	2.649	2.6413
M347T222_NEG	0.65348	0.61085	0.73337	0.73615	0.75431
M370T144_NEG	1.5767	1.4093	1.3844	1.3725	1.3687
M221T31_NEG	0.95929	0.86543	0.85021	0.84306	0.84058
M489T218_NEG	0.79742	1.48	1.5071	1.5226	1.5275
M477T201_NEG	0.7496	0.6786	0.68806	0.71449	0.71264
M477T242_NEG	1.3625	1.2567	1.2343	1.2327	1.2416
M448T235_NEG	0.096472	0.26131	0.29815	0.29696	0.31375
M305T26_NEG	0.5077	0.45455	0.47005	0.4892	0.49347
M211T44_NEG	0.01839	0.21296	0.21431	0.21371	0.21669
M513T426_NEG	0.92509	0.97495	0.97533	0.96576	0.9655
M501T236_NEG	2.0423	1.8354	1.81	1.7944	1.7928
M330T171_NEG	1.0723	0.9581	1.0104	1.0104	1.0126
M229T257_NEG	1.3115	1.1996	1.1783	1.1725	1.1697
M877T434_NEG	0.027477	0.55134	0.54614	0.54167	0.54012
M228T154_NEG	0.12902	0.62929	0.61854	0.62128	0.61954
M215T668_NEG	1.5287	1.3972	1.375	1.3623	1.3629
M259T111_NEG	1.7839	1.5949	1.5673	1.5561	1.5515
M291T291_NEG	1.7018	1.5736	1.5568	1.5509	1.5464
M351T144_NEG	0.15553	0.31179	0.40905	0.50715	0.50618
M721T456_NEG	0.79043	0.72946	0.72226	0.71622	0.71475
M559T211_NEG	0.34754	0.33236	0.32854	0.34177	0.34227
M481T206_NEG	0.0058704	1.051	1.0351	1.0998	1.1005
M99T40_NEG	0.74368	0.71233	0.70453	0.7041	0.70243
M291T368_NEG	0.1528	0.16282	0.16043	0.16636	0.16828
M204T135_NEG	0.68856	0.61646	0.61471	0.61605	0.61461
M439T186_NEG	0.24046	0.34024	0.41875	0.42932	0.43155
M661T375_NEG	0.88573	0.94174	0.93231	0.92331	0.92068
M605T350_NEG	0.22734	0.87912	0.89969	0.89275	0.89585
M771T213_NEG	0.48799	0.92888	0.91987	0.92817	0.92551
M575T239_NEG	1.51	1.426	1.4472	1.4362	1.433
M819T283_NEG	0.32755	0.30625	0.4413	0.52264	0.54529
M377T260_NEG	2.6778	2.8402	2.7887	2.7663	2.7581
M421T230_NEG	1.2492	1.1557	1.1389	1.128	1.1298
M255T33_NEG	0.96378	1.0137	1.0005	1.006	1.0059
M315T44_NEG	0.24025	0.28112	0.53662	0.53143	0.54293
M198T33_NEG	0.72068	0.6614	0.65157	0.64718	0.65475
M415T171_NEG	1.3891	1.4411	1.45	1.4364	1.4445
M363T46_NEG	1.1297	1.0194	1.0802	1.0997	1.124
M391T287_NEG	1.0923	0.97549	1.0984	1.1187	1.1231
M277T727_NEG	0.18611	0.5816	0.6183	0.61474	0.62287
M601T375_NEG	0.80756	0.8328	0.82135	0.81389	0.81412
M313T35_NEG	0.16645	0.1489	0.16108	0.17798	0.20123
M1013T280_NEG	0.13348	0.35053	0.41727	0.41328	0.41206
M999T621_NEG	0.63366	0.76414	0.77374	0.77693	0.7749
M391T358_NEG	0.91116	0.86532	1.178	1.1758	1.1764
M449T215_NEG	0.1231	0.25027	0.2481	0.2857	0.28768
M59T140_NEG	0.51111	0.52115	0.51477	0.5098	0.50862
M329T645_NEG	0.79171	0.88623	0.87466	0.8747	0.87225
M533T227_NEG	0.31711	1.289	1.378	1.3721	1.3832
M533T357_NEG	1.7947	1.7585	1.7273	1.7106	1.7057
M471T257_NEG	1.5723	1.9923	1.9733	1.9605	1.9556
M302T57_NEG	0.20428	0.29171	0.30221	0.30005	0.29977
M339T150_NEG	0.73371	0.74505	0.75327	0.78213	0.77993
M675T260_NEG	0.077832	0.37877	0.70383	0.70243	0.70043
M893T340_NEG	0.084115	0.16918	0.16772	0.18452	0.19488
M783T424_NEG	0.26011	0.51246	0.5032	0.49918	0.49771
M364T149_NEG	0.1855	0.27956	0.27462	0.27268	0.27352
M795T251_NEG	0.18996	0.62877	0.6277	0.67597	0.72632
M419T260_NEG	0.82201	0.73988	0.74224	0.75244	0.75425
M695T425_NEG	0.25195	0.49309	0.4842	0.48182	0.48041
M1055T632_NEG	0.16855	0.63493	0.65764	0.7112	0.7103
M175T663_NEG	0.20996	0.32215	0.32304	0.32097	0.32972
M865T440_NEG	0.10418	0.56664	0.56206	0.56943	0.56814
M687T455_NEG	2.7447	2.5817	2.536	2.5309	2.5253
M366T169_NEG	0.84297	0.75398	0.77934	0.79004	0.78804
M368T36_NEG	0.47987	0.44807	0.43999	0.43686	0.43838
[truncated: 1,748 more rows]
