# Supplementary material for: Metabolome-based prediction of yield heterosis contributes to the breeding of elite rice
Source: Life Sci Alliance. 2019 Dec 13;3(1):e201900551. doi: 10.26508/lsa.201900551 (PMC6918511; doi:10.26508/lsa.201900551)
Supplement: Supplementary file 7 [file LSA-2019-00551_TableS7.xls]

## Sheet: S Table 7 pca score2015 1K
Table S7 Scores of PCA of Pop2015 with the top 1,000 predictive variables.
Name	PC1	PC2	PC3	PC4	PC5	PC6	PC7	PC8	PC9	PC10	PC11	PC12	PC13	PC14	PC15	PC16	PC17	PC18	PC19	PC20	PC21	PC22	PC23	PC24	PC25	PC26	PC27	PC28	PC29	PC30	PC31	PC32	PC33	PC34	PC35	PC36	PC37	PC38	PC39	PC40	PC41	PC42	PC43	PC44	PC45	PC46	PC47	PC48	PC49
YA/(Bph68s/YB//YB-1)F5	-7.3243	0.22878	-4.9573	2.4339	8.41	-3.0126	0.143	-2.7784	0.25679	-0.51479	5.4487	-0.42903	3.4428	-1.8839	3.4304	-2.0015	1.5031	-0.60423	0.33874	-3.5283	2.7385	-1.291	0.63821	-4.0349	3.0675	-1.6645	0.6293	-3.4923	0.8112	-0.6662	-0.075843	-1.7795	1.469	-1.0182	-1.5139	0.71426	0.26648	0.99273	-2.3602	-2.4281	2.3873	1.2732	-0.31437	-0.85897	-0.38554	1.2168	0.53875	1.0823	-0.40166
YA/(Bph68s/YB//YB-2)F5	1.7536	-8.5752	-1.8656	7.7684	-0.98624	8.8843	3.8532	-0.90465	-1.8086	-1.2463	5.8142	-0.54294	-1.7886	3.715	0.036128	-2.5478	-1.8027	1.9256	2.2049	-0.29404	0.63783	2.5257	-1.6364	-1.3966	1.9366	0.16256	3.6185	-1.4461	-0.5343	1.1451	-0.27275	-1.3913	-0.31348	0.85962	-1.7833	-0.01808	1.7565	-0.78412	1.0949	0.67093	-0.69209	0.21696	-0.74568	-0.92509	-0.50904	-0.63786	1.7363	0.14965	0.7981
YA/(Bph68s/YB//YB-3)F5	4.0452	-0.74472	-6.933	7.2966	-0.10409	2.3558	3.0679	0.93552	-1.487	-1.7428	1.5047	-0.73557	-0.1052	0.38469	-0.56302	-0.57436	-3.276	0.84077	-0.26728	0.90104	-0.2198	1.6653	2.3123	0.23373	0.35795	-0.19958	-0.0020489	1.5482	-1.1085	-0.11408	-1.5993	1.175	0.18284	0.85638	0.96836	-0.62469	1.186	-0.45966	-0.26954	-0.24606	0.70203	-0.34238	-0.14124	0.1069	-0.91747	-0.015902	-1.5598	2.8953	-0.65958
YA/(Bph68s/YB//YB-4)F5	3.4636	3.4862	-7.1245	6.0238	1.0894	0.81774	-0.35722	1.3462	-1.4791	0.60779	-0.86158	1.0074	0.57713	0.91264	-0.046458	-0.86095	-1.567	0.60083	1.3424	-0.043043	-2.1101	1.4689	2.7836	-0.86382	1.5067	-0.42756	-1.1693	0.21504	-1.6048	1.1934	-2.5557	0.43641	1.0692	0.24856	-0.37919	0.14878	-0.010945	1.1173	-0.020079	0.55152	0.12053	0.34359	-0.22409	-1.3001	-0.65847	-0.3063	-2.3558	-0.23674	0.77411
YA/(Bph68s/YB//YB-5)F5	-3.1697	3.5443	-8.7043	3.0859	2.0225	0.94638	-0.81824	1.1175	-0.11168	-0.19865	-2.4659	1.3645	2.3539	-2.2634	0.26602	1.1026	0.071465	0.16407	1.5291	0.49617	1.0606	-0.32372	-1.6986	0.40298	-2.1169	-1.0971	0.87151	-0.59762	0.62582	0.49878	0.88636	-0.59288	0.023827	0.66842	-0.16187	-1.8076	-1.2676	0.17022	-0.66199	0.45298	0.57596	-1.0238	0.4212	0.078869	-1.8015	-0.56633	-0.123	-0.046313	-0.78075
YA/(Bph68s/YB//YB-6)F5	-5.8263	-1.1175	-8.2686	1.8383	3.9146	1.4199	0.15687	0.19816	-0.86477	-0.89372	-1.9337	-1.4308	1.4688	-0.52136	1.2028	2.5876	1.4216	0.47354	1.815	-0.041069	1.319	0.38489	-0.58428	1.7103	1.8108	-1.2991	1.131	1.0124	0.30913	0.024449	1.9245	-0.27714	1.1964	-0.16695	-0.26614	-2.1612	-0.74983	1.234	-0.41282	-0.12031	-0.37504	-0.51937	-0.67933	-1.144	0.54034	-0.7927	-0.65341	-0.16677	-0.081437
YA/(Bph68s/YB//YB-7)F5	-4.5177	-2.0806	-8.9458	0.34331	0.79494	2.0343	-2.5005	0.47055	-1.1077	2.2767	-2.0499	1.7533	1.8149	-0.16526	-1.5027	1.4141	0.32653	0.57981	-0.88541	1.3115	1.5961	1.0794	-0.034719	3.785	0.69804	0.6236	0.86294	-0.59074	0.86369	2.5108	0.97795	0.87425	-0.79239	-1.4261	0.084031	-0.66346	1.6795	1.7506	1.1645	0.059386	0.036193	0.24642	-0.77613	2.4956	0.1023	0.096693	0.76258	1.4127	0.35947
YA/(Bph68s/YB//YB-8)F5	-3.3347	-8.2203	-9.817	1.2688	1.305	-0.38589	-0.78058	1.1991	-0.5518	-0.38306	-0.74418	-1.0712	-1.3308	-2.0954	1.0022	3.0445	-1.0985	-1.3096	0.56283	-0.59852	0.50855	-0.4746	-1.7511	-1.1047	0.98488	-1.4011	-0.83171	0.91802	0.68704	1.6768	-1.0481	-1.4075	0.11151	0.88155	2.4133	-0.39051	-0.16659	0.032313	0.5342	-0.94383	-1.0337	1.2586	1.4927	-2.3322	3.8796	-0.51148	0.37165	-0.15997	-0.38967
YA/(Bph68s/YB//YB-9)F5	5.8392	-8.6075	-11.195	2.0705	-3.8277	-0.56058	-0.85174	1.6604	-0.62518	-1.5954	-0.8658	0.34075	2.3731	-1.603	0.46103	0.029712	0.85201	1.6463	-1.8411	0.065724	-2.8866	-0.49856	0.10599	-0.44588	-1.9261	0.62111	-0.70725	1.7743	-1.1056	-0.90357	-0.94767	0.0038941	-1.8052	1.1588	0.83221	2.5114	-1.3617	-1.5365	0.61597	-0.70093	1.8466	-1.8065	-0.61329	0.15398	0.63727	0.89988	0.6162	-2.5983	1.1498
YA/(Bph68s/YB//YB-10)F5	-0.27883	6.1301	-8.324	3.6816	0.31421	-0.41108	-0.88118	0.081029	-0.17763	0.84704	-1.5318	1.1598	1.9417	-0.67234	-0.10013	0.03617	0.55918	-0.12156	-0.45028	-0.52545	-0.28745	1.2857	1.6099	-0.69354	-0.028979	-0.24683	-0.50886	-1.8424	0.034535	-0.74417	-0.0061741	-0.81087	0.92723	-0.41693	1.1628	-0.55143	0.14425	-1.0953	0.23195	0.50373	0.352	2.1797	0.79952	0.94453	-0.035762	-0.77156	1.2836	0.82035	-0.40314
YA/(Bph68s/YB//YB-11)F5	4.8997	1.5896	-6.7197	5.2172	-0.11142	-0.080287	-2.0358	1.7421	-0.68244	-0.63723	-1.7002	0.45244	-0.049893	-0.28452	0.14566	-0.045055	0.4836	1.0133	-1.744	0.79429	0.38021	-0.18049	-0.94458	0.41937	-2.5795	-0.7132	0.0095781	1.1436	-0.62262	-0.82635	-1.1428	0.98421	0.54094	1.3795	-0.50509	-0.52546	1.3582	1.5216	0.98609	-0.016229	-1.1766	-0.90508	0.78193	1.0055	0.30265	-0.20045	-0.34235	0.29974	-0.69005
YA/(Bph68s/YB//YB-12)F5	-2.9359	6.5024	-7.7723	2.9988	5.2147	-1.4158	-2.3022	2.323	-0.53171	1.4959	-0.41534	-1.0072	0.42888	0.20928	-0.40996	0.7183	0.85535	-1.3714	1.3175	0.7274	-0.81893	-1.0211	-3.9741	-0.65692	-0.68886	-0.70101	-0.022886	-0.75015	0.79085	0.85216	0.26642	0.43369	-0.90518	0.30083	0.073365	-0.90404	-0.067977	-2.1715	-0.6511	-0.66698	-2.0813	0.35994	1.0644	-1.1968	0.87519	0.14184	-1.759	-1.0534	1.0578
YA/(Bph68s/YB//YB-13)F5	-5.2847	2.1783	-11.163	-0.36775	-0.63784	-1.7841	-0.92142	0.071115	0.31312	1.7105	-0.27239	-0.65551	-0.78925	1.962	-1.5709	-0.043695	0.90752	-1.0968	0.10369	1.1797	-0.37909	-0.038678	-0.77612	-1.3487	-1.0024	1.0033	-0.8832	-0.42954	1.699	-0.963	0.17831	-0.53699	-1.0761	-2.2301	1.7075	-0.82933	-1.9123	-1.6399	-0.3876	-0.35855	0.981	0.36063	0.39398	1.2029	-1.3501	1.5264	0.64798	0.60172	-0.070655
YA/(Bph68s/YB//YB-14)F5	6.285	3.8542	-7.5307	6.629	-1.2272	-1.0136	-1.244	1.5133	0.51086	-0.089964	0.70402	-1.3393	-0.24313	0.58962	0.52202	-1.0001	1.3334	1.2167	-0.88753	-0.79284	-2.2514	-0.45052	2.3671	0.87197	-0.75856	-0.7593	-0.46928	2.2957	-1.7471	-0.85208	-0.53354	0.45781	1.3747	0.25726	-0.73395	0.17641	1.0632	0.68305	-0.48011	0.42423	0.2111	-0.79285	0.05008	0.13186	-1.1107	-0.65931	-0.16393	-0.70526	-2.2534
YA/(Bph68s/YB//YB-15)F5	4.0261	3.4058	-1.7243	5.4875	-0.51894	-0.69639	-0.5862	-2.4737	2.5668	-1.6967	3.2857	4.069	-0.87333	3.7415	-2.2881	-1.8081	1.8264	-0.65525	-0.30278	-2.4228	-0.70419	-2.7782	-1.2464	1.4709	0.84474	-0.36588	-1.3249	-0.57841	-1.7922	1.7569	0.4091	0.3825	0.091336	-0.437	-1.4829	1.8023	0.99376	-0.23269	0.42172	0.71789	-0.45104	-1.0892	-0.60834	-0.33694	-0.9834	-0.050128	0.18355	-0.30196	0.23309
YA/(Bph68s/YB//YB-16)F5	-0.51236	2.7318	-8.0677	2.6613	1.7315	-0.97551	-2.903	1.0686	-0.13264	2.3574	-0.43462	0.11236	-0.49594	1.6241	-1.1237	-0.72152	1.3331	0.64926	-1.6555	1.0027	0.51081	1.4916	-0.065506	1.6575	-1.6429	0.58424	0.12874	-0.62027	1.1779	-0.64203	-0.51024	-0.47016	-0.53199	-1.1511	0.083879	-0.26698	-1.0528	1.0923	0.30621	-0.4767	-0.803	-0.37296	-1.3233	0.50367	-0.26574	0.77716	-0.70371	0.056375	0.92768
YA/(9311/Shaoniejing//9311K-1)F5	-5.0546	5.1214	0.56641	0.10749	-7.019	5.8757	-1.1883	-4.2378	1.8023	0.67793	-0.84173	2.2815	-0.67491	0.50604	3.6391	-3.4902	0.95012	1.0825	-1.1394	-2.7286	2.5416	0.27258	-1.4411	-2.7951	-0.7634	-1.8903	-3.7028	3.4981	4.3922	2.3276	0.93162	1.2929	-1.0969	2.2809	-1.243	1.9593	-1.6586	2.1122	1.4395	-1.0091	1.1297	1.3223	0.78676	0.12587	-0.64781	-0.7668	-1.3446	-0.062171	0.84673
YA/(9311/Shaoniejing//9311K-2)F5	-9.4508	-3.9804	-5.038	-2.5486	-1.9937	3.143	0.39904	-3.3187	1.3208	-1.6029	1.1169	-0.9343	-1.5348	2.8699	0.096062	-2.2826	2.9092	1.908	-1.4627	-0.91777	0.56321	1.6057	-0.60992	1.8478	0.79729	1.3759	-0.52144	0.7462	2.1692	0.48125	0.33757	2.2066	-1.6524	-0.40737	-0.49991	0.33563	0.20658	0.7637	-1.2142	1.2043	1.182	2.3127	2.5907	1.2009	1.646	0.52447	-1.0562	-1.1102	-0.39276
YA/(Ningbohui2/Ningjing3-1)F5	-6.0848	-0.40274	2.0124	-0.76793	-3.7137	-1.7542	0.82263	3.733	-2.7057	1.3411	-0.33627	-0.023415	-0.18975	-0.99574	0.040908	0.23924	-3.455	1.579	-0.017109	-5.7943	2.4762	-0.0012489	-2.7098	-1.1043	-3.677	-1.2242	1.3934	0.077898	-1.6579	3.4551	-2.1881	2.0208	4.5891	-3.3958	1.8338	2.0732	-2.3887	-1.4658	-0.75498	1.3506	0.26504	0.49509	-2	1.3366	-0.76952	0.43535	1.0936	-0.88776	0.72528
YA/(Ningbohui2/Ningjing3-2)F5	-7.4341	8.7489	-0.22497	1.6733	-7.2382	-2.5219	4.2339	-1.4197	-3.096	-2.0385	-1.1166	0.17972	1.1095	0.40942	-0.16812	-4.5494	-5.3316	2.6514	-2.6286	1.6106	-1.8776	-3.1736	2.8442	-0.77533	0.421	0.39523	3.0263	-2.4913	-0.41852	1.281	-1.0611	1.4025	-1.3108	-1.9546	0.22246	-0.64031	-2.1157	0.35125	-0.59868	-0.096217	1.1883	-0.36254	2.6064	-1.731	2.9804	-1.3444	1.4542	-0.23134	-1.1564
YA/(9311K/Qianlijing-1)F5	-11.075	0.59151	-4.7182	-4.3076	1.5203	-4.7968	0.32165	-0.13092	0.26323	2.6578	-0.41924	-5.3811	-5.8344	3.8696	-0.51663	2.0935	0.54012	-1.1009	-2.4576	4.6924	2.4759	-2.1484	-0.024298	-3.6538	1.0991	-1.838	1.0147	-0.2724	0.9439	1.4015	1.6238	3.1982	-1.0106	-0.90484	-1.2704	2.3142	1.7546	-1.4218	-0.27344	2.1901	-0.81708	-1.7979	-2.1677	-0.094441	-0.50939	-0.26461	0.35209	0.21967	-0.5139
YA/(9311K/Qianlijing-2)F5	4.4564	-3.7755	-1.0088	-1.3184	0.59993	-1.655	-1.5942	-1.0233	-0.75796	1.4964	5.3119	2.189	-0.92015	-0.16765	-1.3478	-1.2288	-1.7457	-2.2306	0.9566	0.67887	4.3196	-0.30354	2.3143	0.66919	-2.4142	0.28626	-2.2345	-1.5035	1.0375	-2.3413	-1.2989	0.23417	-1.0746	2.1949	1.7909	-0.065603	1.8785	-1.7362	-1.6709	0.6972	1.2754	-0.41233	-0.029486	-1.2038	-1.4004	0.089757	1.2765	-0.64703	0.24015
YA/(9311K/Qianlijing-3)F5	0.98679	4.4938	-0.21382	-0.41347	0.8655	-2.0713	2.0467	-0.041181	1.2834	-0.83129	0.92704	0.6101	0.76893	-1.318	1.1517	-1.0048	1.1655	1.0516	-2.7134	0.5252	2.2005	1.177	0.20169	-1.78	-0.20166	3.1133	1.1903	3.7725	-0.5094	-0.22325	-0.98019	-1.9252	0.038727	-0.72618	0.65722	0.50666	3.2631	-0.82534	-0.094786	0.86069	-0.92795	0.88753	0.97396	-1.0661	-0.61895	1.1652	0.67601	0.95343	0.61257
YA/(9311K/Qianlijing-4)F5	-1.8958	2.0662	2.2019	-0.75781	2.6912	4.3974	5.213	3.1402	-3.0112	2.0388	0.88389	-2.5428	-0.70056	3.4519	-2.4619	0.72766	-1.4962	2.3461	0.38671	0.41562	0.86827	-1.1497	-2.562	0.62282	-0.82041	2.1302	-1.3751	0.82537	1.1006	-0.096813	-0.05387	-0.25009	-0.91047	1.4697	-0.098868	-1.7	-1.1555	0.55978	-0.084281	-1.1837	0.23202	1.3459	-0.30054	-0.63335	-1.9972	-1.259	1.6855	-0.63058	-1.4283
YA/(9311K/Qianlijing-5)F5	3.7901	4.9085	3.3586	1.5978	3.8201	-1.8073	4.0754	-0.24683	-1.2877	-1.7789	-0.54806	-0.24641	-1.7355	1.8423	0.18144	1.5079	-2.5338	1.732	-0.45662	-0.72745	1.3007	0.60127	0.55881	1.316	1.888	0.86522	-1.3494	0.16955	0.23591	0.62378	-0.63762	0.04255	-2.2595	0.85275	0.84168	0.08972	-0.58128	0.45559	-0.47804	-0.054653	-1.2852	0.72541	-0.55477	0.83207	0.54874	0.11285	0.55892	-0.21819	-0.41806
YA/(9311K/Qianlijing-6)F5	-6.7439	-1.0382	-1.4858	-6.1601	0.41625	-1.8385	5.5782	1.908	0.82488	-1.748	-0.57286	1.1467	1.138	3.5373	1.9051	-1.6008	0.92135	-0.44099	2.4454	-3.8039	-0.15186	0.80178	-0.90255	-1.5875	-1.6941	0.28341	0.011524	1.0602	-3.9661	-3.2873	1.6353	3.5626	-2.8471	-0.81438	1.5178	-1.3234	0.81677	0.76518	0.86323	-3.8034	-0.96364	-1.091	0.37404	-1.075	-0.083119	0.75881	0.79762	0.3776	0.44169
YA/(9311K/Qianlijing-7)F5	-2.6777	3.1496	1.498	-1.4061	0.028351	-1.2117	3.5985	-0.62694	3.1874	5.6355	-1.3146	1.2155	0.73058	3.3386	-0.39802	0.2923	1.0426	0.82675	1.5923	-1.5556	1.0292	-0.4177	-0.66324	-0.86602	1.1237	-2.905	1.082	-1.0889	0.79405	-2.1787	-1.5071	-0.11361	-1.4009	-0.83931	-0.8002	-0.55081	0.45317	1.1902	-0.44895	0.042338	-1.089	-1.6354	-0.092547	1.4936	0.74567	0.923	-0.59635	1.2112	-2.1897
YA/(9311K/Qianlijing-8)F5	6.1733	-3.2302	-0.14584	-1.978	1.8329	-1.9388	0.44079	1.6449	-1.7505	2.3191	2.71	0.26327	0.33493	1.6564	-0.6608	-0.28527	-0.32951	-0.098478	1.2769	1.1447	1.2333	-2.4328	1.5933	-2.117	-1.4677	-0.30972	-0.55535	0.1819	0.22318	-1.2602	-0.21018	0.76977	0.72556	-0.050132	-0.46617	-2.3182	0.16319	0.23355	1.6342	-0.37473	0.94317	-0.016623	0.11926	2.3217	0.57919	0.018752	0.12563	-2.0197	-0.56131
YA/(9311K/Qianlijing-9)F5	1.7152	-2.7578	2.1833	-0.67036	-5.0792	0.54835	-0.77803	1.1152	4.519	-1.7765	-2.3256	0.27009	1.0817	1.2733	1.1695	0.69567	-1.7695	-1.8971	1.187	0.048374	0.57426	4.1612	-2.7849	-1.447	1.8117	-1.9809	0.99687	-1.1472	-0.03078	-1.0226	-0.0072288	-1.237	0.99717	1.6837	-0.76706	-3.2997	-0.94305	-0.50195	-1.1171	1.1359	-0.051778	-2.3557	-0.26939	0.98607	1.1145	2.3305	0.38388	-0.35415	0.82899
YA/(9311K/Qianlijing-10)F5	5.1596	-6.1933	0.97597	-3.2129	0.51366	-1.0105	-2.0299	0.12184	-3.0686	-1.6711	0.35668	2.7077	1.8885	1.9588	2.25	2.2223	0.024161	0.67389	0.36576	2.3058	0.56636	-1.5737	-0.017989	-1.818	1.7904	0.75855	-0.98901	2.9862	0.70662	-3.4361	-2.4921	0.40762	-0.044307	-2.5614	-0.29622	0.31075	0.048033	1.3449	-0.35157	0.51257	0.88202	0.21104	-1.3239	-0.11727	-0.017943	0.25812	0.30994	-0.4567	1.4328
YA/(9311K/Qianlijing-11)F5	6.7011	-7.6372	0.43995	0.11505	-1.1874	-1.7385	1.1009	-2.4041	-0.96456	-3.8183	2.321	-2.517	-0.76523	0.0605	-0.46704	-0.49098	-0.55472	3.0766	0.89648	0.10644	0.34681	-0.08677	-1.1531	2.4295	0.027826	1.9958	0.48025	-1.7979	1.0809	1.6117	0.40185	0.85081	0.45472	-1.5584	-0.13028	-1.3124	-1.1993	2.2529	-2.5981	0.958	-1.5285	0.62447	0.2737	-0.60388	-1.4495	1.0854	-2.1911	-1.2391	1.1523
YA/(9311K/Qianlijing-12)F5	4.5515	2.6233	3.1373	-2.2381	1.288	0.51854	-2.0085	-0.56716	-1.2809	4.332	-2.1641	-1.9312	0.34079	2.5242	-0.49868	-0.50981	-2.7422	0.66507	3.0034	-0.074128	0.068077	3.3145	0.58728	1.3651	0.40788	-1.97	-0.91643	-0.71508	-0.44233	-1.412	-0.89243	0.68252	-0.36477	-0.73014	0.0964	1.1272	-0.26602	0.89579	-2.3681	0.13374	0.48319	0.65242	-0.11605	0.23691	-1.5159	-1.4298	0.010074	-3.5369	1.412
YA/(9311K/Qianlijing-13)F5	-5.9339	1.9655	-0.52794	-2.0683	1.2523	-0.46051	-4.882	-3.5072	2.9136	1.5149	0.26141	-6.6804	-2.6345	0.47223	-3.5865	-0.059255	-0.64683	1.4769	2.1149	0.41348	0.2431	0.47615	-0.38151	-0.33128	0.75038	1.8729	0.47636	2.3219	-1.5123	-1.1161	-2.1745	-3.7652	-0.56909	-0.12942	-1.7033	3.6448	-1.2843	0.24165	0.66803	1.0762	0.94155	-2.5103	1.3731	0.18918	0.93773	-0.6946	-0.094044	-0.043491	-0.11235
YA/(9311K/Qianlijing-14)F5	7.9824	4.5316	1.9847	1.7765	-2.0726	-4.0948	-1.3764	4.4654	4.6248	-3.7759	0.32646	-2.0456	0.35228	1.1703	0.91892	-0.91194	-1.73	-2.3305	2.8864	0.5075	0.39603	0.64495	1.7072	0.3187	1.0096	-1.0131	0.50874	0.73371	2.4207	0.32212	-0.42615	-0.34625	-1.1129	-1.2636	-0.55961	-0.96823	-0.4705	0.10807	-0.40716	-0.48367	0.53657	0.97053	0.35697	0.079574	0.27893	-1.842	0.096413	1.0631	0.99848
YA/(9311K/Qianlijing-15)F5	5.0106	3.0492	2.0278	-0.33484	-1.6648	-2.0683	-3.0303	4.4721	4.4265	-3.1141	-1.4861	0.78433	-0.64561	2.1925	0.75511	1.3731	-2.5836	-2.07	-0.68442	0.76636	0.29833	1.1846	-0.59614	-0.77303	2.6106	-0.94212	-0.28513	0.81789	0.6828	2.121	-0.79804	-0.1194	-1.0773	-1.9214	0.14607	-0.53	1.0064	-0.39504	2.1405	-0.73622	1.0209	-0.084106	0.78132	-0.73526	-0.48646	-1.1671	0.95383	-0.38084	2.0802
YA/(9311K/Qianlijing-16)F5	1.7645	1.9248	2.1375	1.6562	-0.49878	2.9954	-3.2792	-2.728	4.6627	0.12778	-2.7248	-3.4898	1.2241	-4.5703	-4.6532	0.84016	-2.118	1.4485	1.741	-2.2157	2.0929	-1.7008	0.70972	-1.3111	1.0363	0.55034	0.29788	0.51574	0.7056	-0.82912	-1.3176	0.48943	-1.1688	0.81415	1.537	-0.21436	0.88819	0.98703	0.29147	-0.11823	-0.39323	0.75566	1.3973	1.9411	-2.8195	-0.040736	1.5135	1.9188	0.3326
YA/(9311K/Qianlijing-17)F5	3.1076	0.83999	1.1264	-3.5704	1.077	-1.0748	-1.3267	0.9703	-0.98561	0.045898	-0.44614	1.522	0.20445	2.0127	-3.5076	-0.28587	-0.56206	3.3247	-3.7895	-0.041133	0.59256	0.59541	-1.7452	-1.2321	1.1545	1.0235	-1.5462	-1.5264	0.54215	-0.22402	-0.38087	-2.6581	0.8419	1.9359	-2.4665	-1.6311	-1.4959	1.0513	1.2897	-1.2528	0.94341	0.47662	-1.779	0.09986	1.1518	1.1958	1.0418	-0.60136	-0.057954
YA/(9311K/Qianlijing-18)F5	2.8203	-1.3833	0.83384	1.1706	-3.3785	-0.1748	-3.587	-4.2583	4.529	-3.0788	-1.6737	-2.6384	2.2943	-1.2077	-6.0828	-0.29887	-0.95497	3.0058	3.3118	-1.345	0.082131	-2.8343	-1.7769	-1.5393	-0.15611	-0.050617	-0.91305	-1.8989	-1.0417	-0.90387	-0.10994	-0.44241	0.29007	0.14801	1.5416	-0.86226	1.5475	-0.39613	-0.83109	-0.43286	-1.1331	0.19432	-1.4455	0.15302	1.1288	-0.82427	-1.044	0.33304	0.013538
YA/(9311K/Qianlijing-19)F5	-3.7216	2.4017	1.6906	-3.5584	7.6381	-5.8725	0.17341	-0.23102	-2.1191	-3.6731	1.2106	-2.974	4.7292	-2.0175	0.95153	-0.88442	-1.1432	1.8436	2.3374	0.69719	-0.22495	1.984	-1.2837	1.493	0.21663	0.33286	-0.089102	1.1853	0.86791	1.248	0.064093	1.0865	1.4297	3.4614	-2.4505	2.6139	-2.2272	-3.5826	2.0814	-1.5216	-1.1763	-1.4289	1.2406	-0.77359	-1.1595	0.97568	0.12302	0.22409	-0.51898
YA/(9311K/Qianlijing-20)F5	4.3375	0.80276	1.0846	-1.9442	3.0698	-3.5025	-0.58551	-1.2442	-2.2529	0.23915	0.33878	0.79378	0.36857	0.4431	-1.3945	-1.3592	-0.21816	1.1647	0.52244	-0.51962	-0.54578	-0.91911	-1.1169	0.83182	1.6806	0.59966	-0.67796	-0.42522	0.43865	0.59471	-0.98251	0.95688	1.3107	0.43538	0.12449	0.067676	1.4574	-1.3289	-0.50947	-1.0797	0.021724	0.62221	-0.2937	2.0431	0.65223	-0.95371	-0.33204	-1.3202	-0.76591
YA/(9311K/Qianlijing-21)F5	3.0107	1.1575	0.93138	-2.8096	2.6624	0.18159	-2.1871	0.12104	-3.9487	4.2531	2.2668	-0.26184	-0.68269	0.30804	0.63182	1.5686	-0.77143	0.8413	2.2814	-1.8785	0.91634	-1.3932	1.5208	1.7251	-0.46796	-0.16467	1.0726	-0.43934	-0.56863	1.838	-0.28335	-0.40062	-2.2562	1.9417	-0.75098	-1.2368	0.85136	0.53776	1.174	-0.63152	-0.25639	-0.13248	-1.3364	-1.0272	1.504	1.0988	-2.4797	0.19875	2.5272
YA/(9311K/Qianlijing-22)F5	-1.0949	3.9433	1.1924	-2.2462	-2.6696	-0.43666	-1.3332	-4.2657	-1.4143	3.4511	0.3144	-0.69652	-1.3301	0.57959	1.0554	2.0048	-1.4114	3.6827	-0.36716	0.18887	-3.4716	3.3438	-1.5177	2.0268	-1.9325	-1.9032	0.80137	-0.94244	-0.14227	0.6297	3.2448	-0.55747	0.27233	1.1065	2.1488	1.9027	3.2092	2.1062	-1.1815	-2.1971	0.66932	-1.9988	0.65897	-0.11108	1.3258	1.1148	2.9601	1.3966	0.17243
YA/(9311K/Qianlijing-23)F5	0.61647	4.8804	-0.0048226	-2.0558	-0.088451	-3.8673	1.1075	-0.47051	-0.15114	1.2874	2.5078	-0.85191	0.80826	-0.95706	-1.3974	3.396	-0.3682	2.6586	0.44105	-0.97807	-4.5626	-0.58303	0.31151	-1.707	0.91814	1.15	-2.0666	0.30814	-0.21533	0.79745	2.6547	0.047299	-0.60079	0.84399	-0.13654	-1.5871	1.7002	-0.7661	-0.48899	0.4649	2.5278	2.0749	-1.1378	-1.5777	0.66791	-1.125	0.17259	-0.2633	0.47391
YA/(9311K/Qianlijing-24)F5	4.1833	3.5339	3.0866	-1.3211	1.4516	-1.5716	-2.8593	-4.2123	-2.9649	3.4984	1.5202	-1.3461	-0.91068	-0.82257	2.6487	0.69018	-0.57338	0.68962	1.1748	1.4978	-1.6253	0.56949	0.053302	-0.23444	0.34073	0.22508	0.69858	1.5744	-0.043764	-0.2759	-0.13868	2.7618	2.8118	0.91478	-0.4566	-0.82873	1.1044	0.65188	0.4455	0.31997	1.2834	-1.0622	0.63236	-1.3181	-0.97747	-0.21824	0.19288	0.91126	1.3378
YA/(9311K/Qianlijing-25)F5	6.8933	1.8331	3.0066	-0.10714	0.024402	-2.4648	-2.5083	-0.75497	-0.93891	-2.1824	2.2821	-1.7588	-0.087726	0.3443	1.2301	2.7682	-1.2296	2.3342	1.3726	-2.2263	-2.0351	0.31159	1.1591	-0.13356	-2.6446	-2.5266	0.224	0.65043	2.3725	-1.6192	2.4681	1.1919	-1.8178	-0.92933	-1.3064	-1.4241	-0.91107	-0.91709	2.1471	2.1492	0.39631	1.6018	1.6747	1.326	-0.27439	1.1358	0.91457	-0.071156	0.75979
YA/(9311K/Qianlijing-26)F5	0.91279	-1.255	0.40699	2.2822	-1.4635	0.88796	-1.137	-4.1531	4.0967	-1.6496	-0.34508	-4.6338	-2.874	-4.4483	0.18478	0.39409	-1.092	0.24889	-1.4936	0.1411	1.6344	-1.2125	0.95597	-1.5641	-1.2687	0.62296	1.8067	0.99667	-3.0593	-1.566	3.4045	1.665	0.59752	-1.0073	-0.78831	-0.93171	0.57601	0.65093	1.9227	-0.15169	0.29414	2.6934	-1.3986	-0.58431	0.6337	1.9858	-1.9152	-2.1547	-0.63879
YA/(9311K/Qianlijing-27)F5	2.0545	-1.9743	1.5836	-3.7783	2.7178	0.76745	-3.4194	3.4746	-1.1421	0.70719	-3.5097	-0.37969	0.011632	1.1842	0.23595	1.0822	-0.1449	-0.58395	0.2089	0.68425	0.49191	-1.9998	2.0605	-0.5965	-1.1099	1.5076	-0.43553	-3.1274	0.39409	-0.86393	-0.92927	0.83257	1.3426	-0.56079	-1.3943	2.1817	-0.033956	2.3823	1.0431	-2.3298	-2.0439	0.39251	2.7201	-0.6632	-0.077898	-2.1236	0.19007	-0.0036552	0.66358
YA/(9311K/Qianlijing-28)F5	6.6823	-3.5211	0.49423	-1.7328	1.3226	-2.236	-4.0357	-1.9201	-2.6804	-4.3645	-0.089712	0.41287	0.32346	0.87792	0.78475	-0.92661	2.2495	1.424	-0.32949	-0.30038	-2.5966	2.4282	-0.13099	-2.3282	0.82296	2.592	1.1205	-0.61956	2.6184	0.2639	1.8025	0.17083	1.7839	-2.1051	1.3496	-1.8002	-1.5891	1.258	1.2311	1.2773	0.088088	-2.8562	-0.36768	0.60181	-1.5498	-0.66821	0.55554	1.0759	-0.57548
YA/(9311K/Qianlijing-29)F5	-4.2214	-0.32818	-1.8268	-6.9406	1.6252	0.45757	-0.90309	-0.60753	-1.6519	-1.2326	2.9094	3.7771	-3.2368	-2.0562	-5.0077	-0.39916	-1.9877	-0.27614	-1.7015	-0.57695	2.3056	2.464	0.74709	1.7068	-0.85647	-0.2271	3.602	2.6113	0.6418	-0.92443	-0.66915	-1.0568	-1.516	-0.83329	0.31423	-1.3342	-0.78436	-1.7587	-0.94263	0.58722	1.4984	-0.943	0.91922	-1.1954	1.2299	-0.23775	0.086681	-0.62213	0.049089
YA/(9311K/Qianlijing-30)F5	-2.806	0.73813	0.65449	-1.468	0.11262	3.5328	4.1172	-3.7017	-0.10135	0.25972	0.51178	2.4739	1.7302	-3.2515	1.0659	2.1859	0.82863	0.62725	-0.78932	-0.45002	1.1667	-2.7647	1.276	2.0731	1.6332	-0.21625	1.5197	0.55056	0.75898	-2.3017	0.64211	-0.21528	0.82505	-0.88575	-0.16341	0.12491	0.20313	-1.0187	0.09503	-0.0057419	0.56834	-1.2358	0.88421	1.3619	0.21543	-0.98542	0.76539	0.80065	2.8133
YA/(9311K/Qianlijing-31)F5	-0.1402	6.144	2.3598	0.17977	1.3621	0.68913	1.1616	-0.76077	0.25718	1.6783	0.19757	3.4019	-2.0701	-1.803	0.19044	2.2154	0.98541	1.1747	-0.84627	-1.165	-1.6786	-3.2597	-2.1451	1.1595	0.02705	-0.58218	0.4875	1.5169	0.028202	-0.44059	-0.57419	-0.4991	0.60677	-0.74636	-1.0124	0.61468	-0.15868	-0.64087	-0.61594	0.041476	-0.73557	-0.12401	-1.0309	-0.95218	-0.30115	-0.76278	-0.0072848	1.1177	0.70124
YA/(9311K/Qianlijing-32)F5	2.5139	0.1074	0.053132	-1.1531	-2.6543	2.9972	-2.9612	0.63112	3.1313	3.74	3.926	0.76451	2.6206	-0.32041	-0.24217	0.78471	1.6025	0.46108	-0.95115	2.3474	0.38897	0.57598	1.2176	1.3135	1.0507	-0.93779	-0.90258	-1.9729	-2.186	0.32053	0.241	1.2369	1.72	-0.60075	-1.1603	0.82863	-1.0967	1.0082	1.0685	0.42549	-1.2611	0.54536	-0.77444	-1.5567	0.28523	0.7364	1.1326	-0.18552	0.66397
YA/(9311K/Qianlijing-33)F5	-3.0188	5.8691	0.43165	-5.2732	-1.3594	2.0133	-4.356	1.3928	1.8204	1.3996	2.006	2.1047	0.40957	-0.1036	-0.27748	-1.98	-1.4012	0.15498	-0.58467	-0.23176	1.868	3.6319	0.69829	1.0269	-0.76303	-0.70324	-0.97941	-1.7252	-0.48255	-2.6301	0.33608	1.5124	1.9039	-0.38291	1.1939	0.84195	0.15948	-0.67229	-0.33535	0.26023	-0.43331	0.94189	0.30288	-1.2747	0.93815	-0.21812	-1.4155	0.37149	-0.53506
YA/(9311K/Qianlijing-34)F5	2.85	1.0592	1.1221	-1.4682	1.0617	1.2174	-3.5511	1.4923	0.47054	-4.6683	1.0645	1.9676	3.6373	0.20069	-1.7463	0.93008	0.99035	1.1877	-1.5284	0.86483	2.0986	0.05871	1.9222	0.10358	-1.3272	-0.64787	-1.6187	0.46494	0.040961	1.0719	1.9928	0.3839	0.14455	-2.1735	-0.73868	0.95547	-0.82133	0.5223	0.16365	1.45	-1.4223	-0.49174	-1.2531	-2.7354	0.21306	1.2818	1.6545	0.81588	-0.62239
YA/(9311K/Qianlijing-35)F5	-1.2348	-0.040872	-0.46353	-4.3417	-0.096247	0.8751	-2.1991	1.0204	-1.3349	-2.8703	3.2864	2.1997	-3.666	-4.761	2.3847	3.2551	-2.8017	-1.1186	-1.3266	0.44856	0.94288	0.39188	-0.37136	-0.39141	1.5181	1.5013	-2.4694	-2.9758	-0.73497	2.2642	-1.9537	-0.76258	-1.1747	-0.43411	-0.536	0.26827	1.4289	1.8781	0.89977	-1.1944	-0.24673	-1.2597	2.1136	1.1796	-0.7896	2.347	0.12438	-1.7824	-1.9025
YA/(9311K/Qianlijing-36)F5	-0.76882	9.3716	2.8675	-2.3811	-1.5404	1.2631	-1.722	1.4744	3.2598	-1.6185	2.9456	0.39633	-3.5481	-1.9617	1.6424	2.491	0.28146	0.13318	-3.7068	0.10432	-2.7683	0.27546	-1.3308	-1.4082	-0.27489	0.95226	-1.1041	-0.16537	0.41244	-0.88003	-2.149	1.549	0.89737	1.2306	-2.0369	-3.0046	-0.19147	-1.2261	-2.8841	-0.56673	-0.8999	-0.54009	0.42573	0.89114	1.1242	-0.60415	-1.4357	0.034131	-0.53835
YA/(9311K/Qianlijing-37)F5	2.4287	2.9689	0.97727	-2.1834	-3.0467	2.7553	-0.92779	3.9375	2.4214	1.7645	2.4338	0.91183	1.623	0.18184	-1.2853	0.80946	1.6578	0.38396	-0.59966	0.66761	-2.3579	-0.55906	0.33521	-0.96366	-0.57366	1.2353	-1.0166	-0.75503	0.64935	0.10387	-1.4937	-0.49391	-0.11549	-0.15161	1.175	0.43225	1.2103	-0.48855	0.34388	0.59612	-1.6685	-0.3435	-0.26273	0.50216	0.35134	0.66006	0.57601	0.14273	-1.6106
YA/(9311K/Qianlijing-38)F5	-6.7083	1.4713	2.7432	3.2821	-13.041	-3.1791	-0.88193	-4.4716	-9.9239	-2.5397	2.8521	-3.7221	5.3899	1.2592	-3.3587	5.336	0.53244	-7.6221	-2.879	-1.7087	1.0454	1.4041	-0.69121	0.020977	0.27908	-0.72819	-1.3179	0.14918	-1.8895	-0.18961	0.31786	-0.30166	-1.1631	0.57094	-0.89701	0.24828	-0.16158	0.79214	-0.87536	-0.75823	-0.99832	0.16096	0.23942	0.60989	-0.78277	-1.0549	-0.82246	0.64924	0.096504
YA/(9311K/Qianlijing-39)F5	0.74039	5.6934	3.2384	1.5577	1.9914	8.1135	1.5086	4.8815	-1.8682	-0.57949	5.3687	-4.4193	0.1038	-2.4009	-1.5392	-1.8246	1.8885	-2.5123	-0.62675	2.3315	0.50393	-1.4955	-1.1596	0.1709	-0.42943	0.23317	0.35811	0.39587	0.30488	-0.5547	1.0391	0.97524	1.7775	0.35737	0.99533	-0.21498	-1.762	1.897	0.55178	0.47184	1.1911	-1.1391	-0.025931	2.3715	2.1305	-1.3029	0.45635	1.2501	1.6725
YA/(9311K/Qianlijing-40)F5	5.5126	2.7274	2.1901	-1.3589	-0.15319	3.2015	-3.7189	4.2816	-1.0251	1.1278	3.3157	-0.35663	-1.9615	-1.2095	0.64697	-2.2984	1.2113	-1.7582	0.5198	-0.024173	-0.4338	-0.3252	0.15361	0.90905	-0.8011	-0.26234	0.97717	-0.91635	-0.74255	-0.44121	0.67929	-0.61904	-1.5854	-0.17679	1.5167	0.58722	-2.2044	-1.196	0.077284	-1.5248	1.4808	0.088453	-1.9348	0.49229	1.1664	0.51839	-1.75	0.62697	0.78492
YA/(9311K/Qianlijing-41)F5	-2.0701	4.775	6.1227	3.8321	4.3428	7.3517	1.842	1.1581	-0.1855	-1.9125	2.8128	-1.0115	0.04541	2.0994	1.56	2.6051	-2.0516	0.61694	0.30764	1.2089	-0.21409	-0.61841	1.6262	-0.75488	0.35222	0.25614	-1.9957	1.1666	0.80706	0.87905	2.0876	-0.95257	-0.15336	-2.5967	3.9249	0.90125	-0.0065353	-0.93059	0.53714	-2.3061	-1.9078	-1.2002	-0.66943	0.85793	-0.032977	1.5004	-0.74062	-0.61296	-0.88674
YA/(9311K/Qianlijing-42)F5	3.3681	5.1853	1.9804	-1.1609	0.67339	-2.1996	3.4422	-0.78566	1.6865	0.8828	-0.676	3.38	-1.5363	-2.3162	-0.38187	0.25475	-0.24252	0.14192	-0.50288	-0.51455	0.13314	1.6852	-2.7276	1.364	-0.1854	1.4277	-0.069429	-1.4211	-2.3878	0.061984	-0.20073	0.80289	-2.4995	-0.76419	-1.6181	-1.3753	-1.6811	1.1197	1.5766	1.4783	-1.1223	-0.027787	-0.81637	-1.096	-1.2985	-2.0443	-0.18269	1.6798	-0.36865
YA/(9311K/Qianlijing-43)F5	-1.9109	3.1589	-1.8557	-6.0655	0.068357	-3.0829	1.6699	2.266	-0.18097	-1.2765	-0.41553	1.6925	1.1031	-1.3666	1.3533	-1.4442	0.56764	-0.18523	1.3886	-0.16566	1.3562	1.8718	-1.5281	-0.69632	-0.039802	4.0625	1.0319	2.8532	-2.3494	0.59871	1.0372	-2.7027	0.77323	-0.13874	1.0662	1.1104	1.8424	2.2329	-0.24259	0.82986	-2.178	2.2198	-0.03864	1.4743	0.80105	-0.79613	0.2193	-0.98103	0.010777
YA/(9311K/Qianlijing-44)F5	-0.6515	3.8274	-1.7626	-3.6459	-3.2253	0.90259	2.3946	-2.6085	0.97599	5.5813	1.6444	1.8319	1.3418	0.19599	-0.87891	-0.60102	3.2196	-0.99081	2.4834	-1.0009	0.34417	-0.67362	2.444	-2.4168	0.20497	1.3368	-0.89798	1.384	-1.3218	1.8135	2.0629	-1.713	1.8458	-0.52179	0.13956	-2.1408	-0.20006	0.054643	-0.050545	0.811	0.41549	-3.2007	2.556	-0.91287	-1.0949	-1.3273	-0.35137	-2.141	0.026356
YA/(9311K/Qianlijing-45)F5	4.4326	-1.2693	-1.5004	-2.5475	-4.1067	-1.0143	3.6622	0.9859	0.085118	5.2042	0.18205	-0.087274	-0.84164	-3.3798	-0.64465	-1.5065	1.999	-0.41332	-1.1676	-0.81055	-2.0106	-0.8028	-0.49969	2.0249	1.6559	-1.1095	0.37279	-0.7073	0.52322	-0.13465	-0.76118	0.56758	-0.68843	0.50797	-0.12672	0.90001	0.16973	-0.5227	-0.13831	-0.28145	0.93035	0.57132	-0.45044	0.6369	-0.78511	1.2779	0.40146	0.36661	0.090007
YA/(9311K/Qianlijing-46)F5	4.7164	1.9967	0.68484	-0.50934	2.1726	-3.2739	4.1695	0.34653	1.4506	0.24011	0.22511	-0.90729	-0.015444	-2.7333	-0.84987	-0.42132	2.0029	-0.42933	-2.355	-2.5496	-1.753	0.93105	-0.80534	0.29447	2.3796	-1.5157	-1.2542	-0.88037	1.2657	-0.44717	0.39894	-1.1164	-0.28169	-1.2806	1.3629	1.1324	-0.24054	-0.63358	1.8947	0.95655	0.20837	0.8604	-1.3542	0.089087	0.17014	-0.75884	0.71897	-0.5307	0.5342
YA/(9311K/Qianlijing-47)F5	2.8897	-7.0803	0.53297	-0.3903	1.3157	-0.77289	7.5321	3.6089	-0.27819	2.8507	-1.131	-2.6144	1.1626	-1.9143	-1.8877	-0.85884	-0.15617	-0.71691	-0.49439	-0.38697	-2.1203	0.16688	-1.534	-0.67422	0.058092	-0.091438	-1.8102	0.18682	0.25844	0.0030952	0.23743	0.33167	-1.2893	-0.89285	0.99035	0.53678	0.32027	1.4745	-0.42813	0.61828	0.47482	-0.29634	0.070284	-0.58529	-1.0622	0.87156	-1.2564	-0.62328	0.49483
YA/(9311K/Qianlijing-48)F5	0.59481	-5.7873	0.73564	-0.85511	3.6846	-1.2067	5.4896	-0.6598	-0.029807	1.291	-1.73	-1.9643	-0.92095	-2.2443	-0.78752	1.0623	-0.55603	-0.52487	-2.0857	0.39161	0.90979	1.4052	0.9486	0.38829	1.6087	0.1257	-0.94077	0.25407	0.13554	-1.231	0.94618	0.096478	0.95229	1.1599	1.0737	0.5473	-2.2557	1.8906	-0.86846	1.2123	0.25709	-0.1542	-0.58187	-1.4103	1.2286	-0.25617	-0.69263	1.1788	0.11214
YA/(9311K/Qianlijing-49)F5	5.78	-5.4395	0.56513	-1.1953	-0.27399	-0.10111	2.2526	1.3838	-0.51108	1.2447	-3.4094	-1.21	-2.9871	-0.014122	-0.84536	-1.1742	0.42914	-1.026	-1.6161	-0.49158	-0.68319	-0.43551	0.71002	-0.8495	1.8278	1.0078	-1.1996	-1.3111	0.78224	-0.6266	0.7973	0.52281	1.3283	-0.51919	0.19727	-0.39885	-1.3032	-0.34892	0.10601	0.0038093	-0.80005	-0.079177	0.8771	-0.92272	-0.24297	0.34091	-0.24376	0.2485	-0.007232
YA/(9311K/Qianlijing-50)F5	4.8164	-6.6206	-0.63311	-1.5396	0.93202	0.30504	0.5322	0.89654	-0.93061	0.97425	-0.31454	-1.4245	-1.8578	-3.7043	2.4504	-0.76637	-0.82334	-2.1282	1.1493	-1.58	0.11166	0.018466	-1.8308	0.085122	-0.36296	-0.67841	-0.011378	-1.1112	0.24667	-1.5791	-1.1444	1.805	-0.45937	-0.40934	0.97275	0.62853	0.14164	1.1486	1.3092	0.96989	-0.44804	-1.722	1.9601	-0.61421	-0.26076	-0.4371	0.40745	0.83266	-0.69376
YA/(9311K/Qianlijing-51)F5	-1.0372	2.4817	2.4368	-0.26316	-3.7188	3.0902	1.3948	4.7833	5.4657	-1.2185	-1.8042	-2.2677	3.1344	-0.712	3.4226	1.4817	-1.3294	-0.82936	-0.72408	1.2638	1.0637	0.38057	-1.4533	0.3129	-0.77253	-0.027067	2.3142	0.63728	-0.0004311	0.18941	-0.76535	-0.21943	-0.33267	0.66049	-0.75818	0.020145	1.3978	1.4345	-0.81669	-0.87379	3.5141	-1.6098	-2.5817	-1.44	-0.94441	-0.93926	-0.16125	-2.0864	-1.2411
YA/(9311K/Qianlijing-52)F5	-2.9439	-4.0013	-1.3939	-5.1072	-6.6719	0.28724	-0.50892	2.408	3.481	2.5409	2.8108	-1.6476	5.767	0.29457	3.9573	0.64113	-0.0047795	-0.91492	2.7607	2.1221	-1.6594	-0.44515	0.13056	2.328	2.6823	2.8347	0.84965	-0.27843	0.53288	0.44863	0.45982	1.4159	-0.9008	1.0451	0.47215	0.63641	-1.0202	-1.3137	-1.2999	2.5281	-0.22405	1.9973	0.16213	-0.15706	-0.67276	1.0421	0.41021	0.86869	-2.262
YA/(9311K/Qianlijing-53)F5	-1.4266	6.3957	4.1135	0.057017	6.0443	1.161	2.6125	-2.9208	0.18031	-0.4435	-3.8628	1.7335	2.2523	-2.4064	-0.14536	0.25863	2.0389	-2.0815	1.0663	3.6257	0.3243	0.044048	0.67091	-2.4209	-3.0967	1.2125	1.5523	-0.48439	-0.076294	3.6982	-1.1892	2.1049	-0.95042	1.387	-0.43907	-0.92389	0.39705	0.12233	-3.0078	0.12949	0.202	0.54234	-0.8869	1.0231	-0.11651	0.31678	1.3846	-0.5612	1.6017
YA/(9311K/Qianlijing-54)F5	2.2662	-5.1122	0.63098	-0.44267	0.25566	3.5139	0.342	-1.4248	-2.5867	-0.67166	-3.505	0.35506	-0.24613	0.29663	1.0633	0.16974	1.4691	0.74152	-1.7273	0.75416	-0.70648	-0.2667	1.4773	-0.53739	0.61319	0.66082	0.53903	-0.79461	-0.99599	-0.87818	-0.79713	1.0101	0.9347	0.27834	-0.93403	0.061728	0.92764	0.15921	-2.1765	0.059858	-0.97515	0.26226	0.6988	-0.4329	0.33844	0.20664	0.28069	-0.81184	2.0591
YA/(9311K/Qianlijing-55)F5	2.5624	-4.2002	4.347	0.58368	1.1922	4.2455	1.3251	-1.4441	-1.0031	-2.7318	-0.30796	0.29942	2.594	1.9208	-0.36234	-0.65666	1.755	0.64409	0.59583	2.8173	-1.2767	-0.077629	-3.8455	-2.9186	-3.2237	0.42684	-1.4556	-1.2187	-0.79528	-1.6854	-0.53761	-1.1804	-1.1391	-1.2579	-0.37652	1.8544	-0.11354	-0.8658	-1.0675	1.1231	0.80439	0.10746	1.2371	-1.5389	0.91755	-0.3481	-1.4115	2.4047	0.58501
YA/(9311K/Qianlijing-56)F5	4.2367	1.5235	2.5438	-0.11885	3.8807	0.48609	0.42572	-2.4087	-1.6639	-2.6532	-0.61019	1.4331	1.0594	-0.66291	0.67106	-1.362	0.36881	-0.9718	1.6374	1.722	1.1166	-0.51563	-1.6705	1.2204	-1.3615	-0.16828	-0.28642	-1.3264	-0.54188	0.56777	0.1626	1.2303	-1.8416	-0.47058	0.15164	0.43535	2.1996	-1.6152	0.44255	2.4675	0.94579	0.62778	1.2581	1.0068	0.33557	0.87906	-1.3422	-0.090282	-0.41762
YA/(9311K/Qianlijing-57)F5	6.191	-0.13882	1.5233	-1.9112	-1.0457	1.5623	-1.1541	-2.5403	-1.7841	-1.3297	-4.6042	2.1213	0.524	0.91093	-0.41903	-0.58407	2.397	-0.2999	0.015886	-0.36771	0.49182	1.1244	-1.287	-1.569	0.076475	-0.66131	-0.4603	-1.6814	-1.3282	0.64932	0.18946	-0.80147	-0.014841	0.64803	0.045332	0.031578	0.42123	-1.3243	0.339	1.1096	1.0759	-0.53102	0.054716	0.6267	1.7188	0.60869	0.06308	-0.53427	0.3095
YA/(9311K/Qianlijing-58)F5	2.6263	-6.9683	0.17351	-0.73239	-1.3834	-7.0456	3.2518	2.5787	4.1947	-1.6907	3.0824	1.363	0.95639	2.641	0.71136	-0.14543	-1.2282	-0.35369	-0.91453	-0.1777	0.15826	-1.4839	-0.3606	0.50558	-1.3037	1.1762	1.3812	-1.7069	1.3744	1.6243	2.104	-0.88858	2.1074	1.9492	1.7077	1.7237	2.087	0.18883	0.34932	-0.28077	0.66023	-1.0812	0.53756	2.6946	1.1696	-2.9855	-2.6371	0.46972	1.3298
YA/(9311K/Qianlijing-59)F5	2.0291	-1.836	0.31236	-3.5509	-0.17684	-1.2856	-1.4971	3.0589	0.65136	1.3226	-2.4877	0.93893	-1.4156	1.2202	-1.1195	-0.72145	0.0282	-2.2863	-0.51697	-0.70123	1.4133	0.77676	1.3056	0.22362	-1.2241	-0.61988	1.0284	-1.1273	-0.21884	0.27715	2.1405	-0.39963	0.29026	1.393	-0.64088	0.57897	0.97202	0.15017	2.1802	1.2739	0.60374	1.6678	0.55449	-1.5137	-0.11763	-0.84446	-0.38205	0.80199	0.44237
YA/(9311K/Qianlijing-60)F5	4.8324	-0.38361	0.96407	-0.34727	-1.157	4.029	2.0113	3.3076	-1.7033	1.1818	-0.42863	-1.1752	-1.9547	-0.8724	-0.93849	-1.7633	1.5039	-1.4458	0.51533	-0.70668	-0.38022	-0.33916	-1.8075	-0.41897	-0.0041338	-0.41593	-0.67605	-0.11144	-0.16227	1.1238	-0.034191	-0.06502	0.99119	1.2269	-0.65087	-0.027868	0.29882	-1.5419	0.52977	0.74939	-0.21849	0.50728	1.3963	-1.0037	-1.0014	-0.030918	1.2886	-0.026358	-1.1749
YA/(9311K/Qianlijing-61)F5	7.7918	1.7139	2.5189	-3.1783	1.325	0.23741	-4.4605	-3.3724	-5.4115	0.76108	-2.5342	1.2423	-2.9657	0.12125	1.6655	-1.1439	-0.0097811	-1.5292	0.46814	0.76738	-0.92023	1.74	-0.61553	-1.1718	0.25617	-0.074306	0.81273	1.0052	1.1443	-0.016441	0.26938	-1.5057	0.26588	-0.39312	2.4918	1.1299	0.19577	0.27472	-1.8567	-0.64441	1.3618	1.6289	-2.4285	-0.56054	-0.76041	-1.7864	-1.4839	1.3246	-3.4687
YA/(9311K/Qianlijing-62)F5	9.3366	4.1251	1.2245	1.4386	-0.006731	-1.9832	1.3351	2.0571	-1.4117	-2.2743	0.98342	-3.107	-1.7723	0.21219	0.60329	-1.9331	4.3524	-1.6063	1.512	-2.5916	-1.3689	0.27479	2.3552	0.099008	-0.76241	-2.0218	2.238	0.92485	0.80444	0.5847	-1.1551	-1.4048	-1.1228	0.023261	-1.7803	1.0636	0.48896	1.9095	-1.9406	1.0705	-2.2714	0.40708	-0.49556	0.96315	1.4149	1.8322	1.5772	-0.96812	-0.13061
YA/(9311K/Qianlijing-63)F5	5.0741	-3.8762	0.56158	-1.9573	-3.6667	2.639	-4.7764	-1.3075	1.2052	0.66932	-3.1296	-1.0412	-0.19787	0.21239	-0.65177	-1.5255	1.8642	0.35975	-1.1381	0.05609	0.069958	-0.74814	0.64346	-0.10353	3.0765	1.6935	1.4517	-0.3923	-1.5697	2.8137	0.099614	1.5045	-1.5773	-0.33742	1.1618	-0.30199	-0.045341	-2.7531	0.42104	-3.4238	0.32001	0.022608	-0.7313	-0.90038	-1.1344	0.4403	0.067048	1.1616	1.2884
YA/(9311K/Qianlijing-64)F5	8.2659	-1.3344	2.2463	-2.3578	-0.87147	0.28722	-2.7652	-0.25184	-2.3267	0.30127	-2.2895	-1.0037	-1.8908	-0.074526	1.5228	-1.1562	1.7355	-1.8044	1.8041	-0.8282	-0.51642	-1.6713	1.7718	-0.1721	0.11487	0.97442	2.4822	-0.13301	-1.3957	1.7437	0.82135	-1.3604	-1.3844	0.49559	-0.40459	0.12326	-2.0106	-0.014049	-0.21331	-1.704	0.51435	-0.33655	0.56894	1.4749	-0.067511	0.95323	0.024188	0.49711	-1.6324
YA/(9311K/Qianlijing-65)F5	0.082926	-3.161	1.1119	-0.36987	0.73012	3.5316	1.779	1.2706	0.81635	-0.37108	-0.57508	0.69416	-1.0322	-1.8001	-1.1586	0.70318	-1.039	-2.3792	-0.38632	-0.64468	-1.9248	0.88394	0.58323	-0.75997	0.52766	-2.601	-0.20121	0.25902	0.77278	0.67636	0.50871	-0.76203	0.13277	-0.87882	-0.85847	0.86738	2.1811	-0.93796	-0.26496	0.64688	-1.0364	0.25703	0.58059	-0.84819	-0.30203	-0.62467	0.078866	-0.87519	-0.55604
YA/(9311K/Qianlijing-66)F5	-16.74	-1.2907	-1.3793	-8.7883	0.64601	2.6418	2.3634	-0.67856	1.526	-8.796	-0.82635	-1.0077	-5.3358	2.7865	0.4608	3.6343	4.8472	0.48976	2.8488	-0.48891	-2.0217	-0.62304	2.4593	2.5983	-0.40676	-2.1908	-1.453	-1.2908	-2.4104	0.70244	-3.1277	-0.75034	2.1462	1.1051	1.8976	-0.90688	-0.33897	-0.063707	0.8676	0.73166	2.3361	1.1668	-0.15758	0.20996	-1.6004	-0.38962	0.30644	0.57388	0.54074
YA/(9311K/Qianlijing-67)F5	-6.8604	-9.7474	3.2574	-2.2247	4.4831	2.17	0.93453	-0.53103	2.8604	-0.40453	0.40392	4.2103	2.1799	-0.64381	-6.3162	0.58677	-2.0186	-2.9689	0.0093014	0.23251	-4.9058	1.0414	3.2444	-1.6805	-2.0267	-2.3677	2.2181	1.8873	2.939	1.5851	0.30537	0.25669	0.002945	0.53028	-0.61133	0.64906	-0.4788	1.1443	-0.55153	-1.1806	-1.1499	0.69546	-0.039124	-0.3707	-0.50374	0.74957	-0.42228	-0.22289	-0.40101
YA/(9311K/Qianlijing-68)F5	2.2117	6.6496	2.7126	1.7413	3.3254	-0.71832	4.9759	-1.229	-0.020508	0.66973	-2.4028	-0.00397	1.8739	1.7417	-0.05724	0.025044	-0.37098	-0.17309	-1.0842	0.54703	1.4351	3.0579	3.406	-1.76	2.3529	-0.54193	-1.0928	0.69158	-2.4856	0.17822	-1.2268	1.3548	0.43404	2.285	1.3863	0.58801	-1.3805	-1.0201	1.9937	1.222	-0.00054445	0.09718	-0.34364	1.9412	1.6264	1.4244	-0.85534	1.0715	0.26937
YA/(9311K/Qianlijing-69)F5	-0.017044	-3.9373	2.5852	-2.9615	-1.3038	2.2608	0.23618	0.76202	0.81617	2.7578	-1.5144	0.2646	2.3761	3.0838	0.27605	2.4008	-1.3086	2.055	-0.55932	-0.056754	1.0667	-1.7962	1.3005	-0.4174	-2.2506	-0.23417	1.2097	-0.38972	-0.78622	0.12558	0.93942	-1.5285	2.2986	1.8191	-0.49801	-0.15844	-1.0503	-0.3024	0.39901	0.60605	-0.00044427	1.4659	0.83721	0.24811	0.43469	1.0515	-0.98908	0.34801	-2.4444
YA/(9311K/Qianlijing-70)F5	3.4422	-1.953	1.1675	-2.0555	-3.4427	0.76069	0.59492	-0.81126	1.1493	3.2937	-1.5762	1.1121	0.38477	1.8437	1.4934	1.7972	-1.1657	0.87014	-0.37489	-1.0206	0.61736	-1.6475	-0.2137	1.9636	1.6814	-0.081613	0.027614	2.8536	1.4783	0.0062473	-1.0391	-0.87139	1.5762	-1.3931	-0.024479	0.20017	-0.44308	-2.1542	-2.5526	-0.75695	-1.9959	-0.25244	1.2095	-0.03033	0.31584	1.2652	-1.4521	0.98299	1.3762
YA/(9311K/Qianlijing-71)F5	8.3402	0.52193	0.067673	-0.80187	-3.0981	-3.4547	2.367	1.8681	-0.26493	-1.5243	0.25608	1.495	-2.2019	1.0771	0.75456	1.3652	0.33535	0.39703	0.5006	-0.6015	2.5116	-3.3892	0.79699	1.1236	-2.1565	-0.74392	0.63114	1.3436	-0.53079	0.87444	0.11895	-2.1399	-0.65113	0.41413	-0.84787	-0.77194	-1.1034	0.47253	-0.43411	0.016559	0.10738	-0.44512	0.028297	-1.6719	-0.78937	0.81065	-0.73283	2.5786	-0.7768
YA/(9311K/Qianlijing-72)F5	-9.1844	-0.34139	-3.0128	-4.8724	1.9164	0.045434	-1.5885	0.3874	2.479	-3.2695	1.8688	1.2404	0.040813	-0.096144	-1.2289	-2.819	0.023053	-1.2558	-1.0683	-0.55802	-1.8964	0.8185	0.12173	0.90094	0.45794	0.95347	1.5791	0.45264	-0.91353	-2.5564	0.26469	1.5095	-0.14686	1.0057	-1.9166	1.3631	-1.1047	0.0081552	-0.80474	-2.1253	-2.0943	0.43339	-1.7856	1.2154	-0.84872	-1.7979	-0.18841	0.040715	-0.27598
YA/(9311K/Qianlijing-73)F5	2.486	-1.289	0.92475	-2.0589	1.3977	1.7415	1.499	1.9838	-2.635	-1.6835	-2.7704	1.8187	4.0868	-1.1534	0.45291	2.3473	0.35069	2.562	-0.8756	1.6344	1.011	-2.0085	-0.11517	1.6403	1.6362	-2.4024	0.46529	-0.27705	-0.51098	-1.2321	0.54417	-1.3472	-2.2356	-0.67785	-1.7174	2.2522	0.17355	-0.21578	0.39731	-0.083435	1.8448	0.35386	-0.23965	1.1258	-0.21383	-1.4174	0.009827	-1.2488	-0.94971
YA/(9311K/Qianlijing-74)F5	3.9362	-1.5614	-0.23108	1.9189	1.1928	3.9634	-0.21884	-3.7417	-1.0535	-3.4674	-1.8969	1.9367	-0.80592	-0.91737	1.3624	-0.3643	-0.80986	0.010095	-0.20062	-2.0476	1.4675	-0.8255	0.86036	1.1562	2.0671	-1.1759	-0.17984	-0.10181	0.45096	-1.0561	2.6564	1.3884	-0.046334	0.55729	0.26836	-0.12855	0.15877	-2.395	-0.38761	0.85049	-1.8168	-2.3431	-0.82218	0.46294	0.36052	-2.1711	-0.42644	-1.9759	-2.5309
YA/(9311K/WH1394)F5	-8.7326	-9.2208	5.6252	-0.9681	8.6235	0.79146	-5.4455	-2.3463	1.8188	2.7647	-0.25651	-5.1617	3.8872	1.6954	5.34	-3.4617	-1.4653	-0.60054	-7.0201	-3.3332	-1.5875	-1.0691	1.0427	1.6515	-2.6686	-0.78441	-1.5576	0.24307	-1.4966	1.3988	-1.875	-2.2541	-2.0895	-0.20898	0.52533	-3.1846	0.81666	-0.63764	-0.046042	1.8554	-0.94253	-0.60069	-0.5515	0.26561	-0.26149	-1.6722	0.68818	0.64399	0.23306
YA/(WH1424/Shaoniejing-1)F5	-13.324	5.0397	-2.4377	-6.0303	-5.7302	-0.21673	1.0241	-0.62692	-4.4502	-2.2431	-2.8525	0.14245	-0.26165	-1.7421	1.0078	-7.4128	-4.9438	-1.4921	1.7543	3.635	-2.1988	-3.417	-0.21153	0.94819	0.61594	-1.8413	-2.1339	0.10432	0.98345	-1.374	0.96666	-3.1924	1.4181	0.37382	-0.45216	-1.2986	1.7779	0.60185	1.6272	0.92847	-1.6293	-0.269	-2.0129	0.30683	-1.2843	2.2386	-0.59357	0.20152	1.4963
YA/(WH1424/Shaoniejing-2)F5	-6.4773	4.5717	-0.63762	8.2657	4.0068	0.77464	-0.15135	-4.1156	3.9663	0.90198	-1.7317	3.3021	-1.7129	1.91	1.5909	2.3922	-3.9603	-4.8288	1.1774	-2.4316	-2.2705	-1.4122	0.43817	1.0195	-0.68034	5.0614	-0.31919	-1.8712	0.17713	-0.89148	1.2358	-0.7696	-0.91281	0.71387	0.20654	2.6729	-2.1388	1.2876	-0.11212	2.0928	1.4356	-1.0638	-0.73904	-0.41809	-0.022145	1.6229	-0.12325	-0.67246	0.75358
YA/(WH1424/Shaoniejing-3)F5	3.7922	-4.2382	-2.3096	4.944	0.5736	0.97618	-1.6072	-1.3576	-0.60361	0.78756	-1.0295	1.5151	-3.1178	2.4618	2.0429	1.529	-2.9749	-3.7243	0.025975	0.17232	-1.401	-1.6922	-2.1725	-0.028989	-0.069452	1.3184	0.94779	1.4099	-0.86039	-2.3591	0.95547	0.34185	2.2354	0.96249	-1.6001	-0.17256	-0.37601	-1.1526	0.19623	-0.49636	-0.27916	3.0428	0.044789	1.2046	0.60187	-0.099217	3.4615	0.47252	0.30633
YA/(610234/WH1403-1)F5	-0.57538	-7.8437	1.5139	1.203	-0.2302	-1.6537	4.0373	-8.0948	1.9056	4.5249	2.5739	1.0248	0.13448	-0.79327	0.31942	-0.090893	0.14057	-2.254	1.531	3.4463	-0.54551	2.107	-0.46551	0.67229	-1.1194	0.031236	-0.4358	1.0212	-1.029	1.5283	-1.8781	-0.97832	0.4795	-3.4953	-1.6689	-1.9163	-0.97059	-0.92196	3.2038	-2.1209	0.16238	0.71509	-0.43823	1.3154	0.24094	-1.1868	-0.63123	-0.64888	-1.178
YA/(610234/WH1403-2)F5	5.3097	1.9523	2.802	4.8445	-1.6064	-3.0588	2.8625	-6.3104	4.1199	-1.3738	-0.1063	-1.3426	-0.3815	-0.21856	1.3947	-0.55552	1.4183	-0.38489	1.0703	3.6368	0.3087	0.51581	-1.0486	3.1506	-2.8477	-2.2042	-0.69878	-0.59055	0.95011	-0.15849	-2.037	-0.13941	1.4195	-1.6543	0.43009	1.0282	-0.12565	0.43035	0.75277	-2.0914	-0.08923	0.78881	-0.0012354	-1.1943	1.2945	0.31056	0.57974	0.010015	-0.95115
YA/(Liaoxing1/Shaoniejing-1)F5	-9.4167	-4.3051	10.188	6.4578	2.8915	-4.1502	-6.2851	1.8141	-0.57397	0.35132	0.45346	3.1626	0.94002	0.89632	-2.8949	-2.7109	1.8645	-1.5643	1.9534	0.33261	0.16324	-2.9756	-2.4459	1.9953	3.2701	-0.67367	-0.68051	3.3243	-0.74863	0.72826	-0.87415	2.8016	0.50263	1.0723	2.4438	-1.3011	0.060661	2.3304	0.21122	1.0099	1.3288	-0.41968	0.3008	-1.2339	1.9611	0.99562	1.3349	-0.52461	-1.5513
YA/(Liaoxing1/Shaoniejing-2)F5	-9.4889	5.2085	7.8788	6.4506	-1.1493	0.26873	1.0249	1.9597	-3.0151	-0.0087294	-3.187	-1.7516	1.3317	1.3939	-1.3025	0.90538	3.2952	-0.91334	-1.7621	-2.6817	-0.04387	0.87211	0.15303	1.7403	-0.36188	3.3751	3.5151	-1.3814	4.2669	-2.3507	-2.0509	0.12277	1.7489	-0.67076	-0.057935	-0.5054	3.0775	-1.2261	3.1913	-0.76424	1.132	-0.091169	0.091129	-1.8588	-0.55646	1.6454	-1.7629	-1.3494	-0.567
YA/(Liaoxing1/Shaoniejing-3)F5	-7.2074	-3.2402	6.4544	7.5987	-1.3838	-4.5809	-2.1578	0.3818	0.49268	0.83544	2.6	3.5627	-1.9975	-0.36224	1.19	0.73742	1.602	3.2813	-3.254	3.7203	-0.44073	-0.27816	-1.3686	-2.3514	1.2517	-3.2096	3.7533	-0.78308	-1.5794	-1.2954	-0.054836	-1.2126	-1.2451	2.7404	3.4605	0.51049	-1.9589	0.8884	0.4554	0.29447	-1.3602	1.1782	1.7681	0.60031	-3.6614	0.17484	-1.2396	-1.1845	0.86885
YA/(Liaoxing1/Shaoniejing-4)F5	-12.15	-11.17	5.4624	7.1568	-1.2765	-2.4376	-1.1398	6.0245	-1.1555	0.61432	-1.6712	2.0182	-2.6585	-2.7045	-0.46726	-0.10877	-0.91877	2.622	1.7382	-0.52279	-0.2457	1.8171	1.1872	-0.7472	-0.4597	0.9875	-2.8312	0.41358	-0.78945	0.44458	0.96828	1.1329	-0.013784	-1.4308	-4.1535	0.37492	1.5656	-0.60815	-1.479	-0.55444	2.1554	-0.91866	-0.26692	1.9282	0.41515	0.73659	-1.015	2.7925	-0.59181
YA/(Liaoxing1/Shaoniejing-5)F5	-12.686	-4.5221	3.3764	5.7337	-7.3087	-1.5868	-0.79818	0.75677	-1.8848	2.0277	-0.037696	1.2304	-1.6587	-3.4307	2.9507	1.1292	2.8081	2.9051	4.5276	0.031851	0.80227	1.0403	3.0554	-1.6588	-1.3991	1.8889	-0.80451	-1.2349	2.538	-0.73032	-1.3536	-0.45456	-1.9625	1.2757	0.57816	-0.037487	-0.72745	-1.0134	1.0867	0.73854	-2.8889	-0.28445	-2.9665	-0.62873	1.8281	-2.4436	1.2999	-0.43121	0.41231
YA/(Liaoxing1/Shaoniejing-6)F5	-8.5856	1.9506	7.4577	8.4997	1.1507	-1.6694	-1.1288	5.1262	0.089661	1.2384	-1.7759	-0.87925	-1.775	-0.59335	-0.059365	-1.7092	1.8929	0.48905	0.34961	1.7945	0.91122	1.6495	0.92732	2.1551	0.28885	-0.37102	-1.9594	0.060456	-2.3982	-0.46198	3.9114	-2.717	0.076938	-1.8665	-0.69934	-0.53782	-0.50429	-1.682	-2.2325	-0.93628	0.24765	0.6949	2.3879	0.26634	-0.55529	-0.42768	0.56027	-1.0142	0.75001
YA/(Ningbohui2/Ningjing3)F5	6.0552	-4.7134	0.52243	2.3204	-2.361	-3.737	3.7284	-2.1514	2.7717	-1.7466	-1.4875	-1.1041	-1.5801	0.039212	-0.84488	-1.5917	1.2549	-0.87934	-2.4867	1.1896	2.9086	0.20466	1.4301	1.8676	-1.507	1.2962	-2.4084	-0.03434	1.8477	0.054147	0.85428	-0.12165	1.1847	2.4666	0.50864	-0.69458	-0.3776	-0.46326	-1.6544	-1.8819	0.079439	-1.0454	-0.90915	-0.47109	-0.62285	0.478	1.9256	-0.35474	0.30222
[truncated: 58 more columns]
