# Supplementary material for: Metabolome-based prediction of yield heterosis contributes to the breeding of elite rice
Source: Life Sci Alliance. 2019 Dec 13;3(1):e201900551. doi: 10.26508/lsa.201900551 (PMC6918511; doi:10.26508/lsa.201900551)
Supplement: Supplementary file 8 [file LSA-2019-00551_TableS8.xls]

## Sheet: S Table 8 PCA score12 3746
Table S8 Scores of PCA of Pop2012 with the 3,746 predictive variables.
Name	PC1	PC2	PC3	PC4	PC5	PC6	PC7	PC8	PC9	PC10	PC11	PC12	PC13	PC14	PC15	PC16	PC17	PC18	PC19	PC20	PC21	PC22	PC23	PC24	PC25	PC26	PC27	PC28	PC29	PC30	PC31	PC32	PC33	PC34	PC35	PC36	PC37	PC38	PC39	PC40	PC41	PC42	PC43	PC44	PC45	PC46	PC47	PC48	PC49
110080/610234	-0.96302	5.8387	-0.73274	0.5487	-5.5176	6.1314	-16.065	4.0403	-5.823	-0.90241	0.0041901	-13.704	-2.6859	-3.7582	11.515	15.369	2.9441	1.9799e-08	-2.2458e-09	-2.3619e-09	1.0511e-09	-3.6696e-10	1.6454e-09	-6.2918e-10	-1.3164e-09	1.5502e-10	-1.4112e-09	9.9464e-10	-2.1789e-09	1.9198e-09	-1.1571e-09	7.9171e-11	8.7441e-10	-2.3258e-09	1.8838e-09	-6.8558e-10	-1.161e-09	1.0389e-09	-1.56e-09	-9.4317e-10	1.2562e-10	1.8197e-09	-1.3578e-09	-1.1606e-09	-2.4019e-09	6.7466e-10	9.7418e-10	-1.0034e-09	-8.6143e-10
110080/9311K	-0.68354	10.554	-8.0319	-3.3246	-15.229	21.106	-22.01	2.6115	-6.2845	0.59066	2.9826	-2.8827	-7.8403	-1.2126	1.5193	-4.523	4.0897	-2.0439e-09	-1.8395e-09	-2.712e-09	-1.7417e-09	4.3982e-10	1.1768e-09	3.0623e-10	1.2471e-09	-2.1068e-09	-1.158e-09	-1.1465e-10	-1.6318e-09	-9.7332e-10	-7.7083e-10	-2.4127e-10	1.2102e-09	-4.1416e-10	1.5473e-10	-2.6542e-09	-7.8983e-10	-9.3242e-10	-1.9547e-09	-5.2439e-10	-3.7762e-10	1.3127e-09	-2.4785e-09	1.7683e-09	2.9543e-09	-1.0774e-09	-1.9372e-10	1.884e-09	9.3587e-10
110080/Balilla	-2.7384	8.2482	7.3684	5.1962	-11.702	15.363	-6.5343	5.7908	2.1667	-10.844	-11.651	-17.522	1.1556	-10.577	-3.3674	-0.068433	5.7889	2.0504e-08	-2.3552e-09	-3.3875e-11	1.227e-09	-8.823e-10	-1.7435e-11	-3.0441e-10	5.3033e-10	3.317e-11	-1.5122e-10	-3.992e-10	4.9735e-11	4.4875e-10	-5.2138e-10	3.1687e-10	-5.3969e-10	3.525e-10	-5.082e-10	5.7055e-10	1.5675e-10	7.3798e-10	2.2573e-10	-1.9772e-10	4.0988e-10	2.34e-10	-4.9571e-10	-6.3369e-10	6.841e-10	1.8373e-10	-5.7671e-10	-1.9086e-10	-4.0188e-10
110080/C418	-29.004	-32.56	-7.7223	-6.1781	-8.5172	5.756	-12.64	9.8402	-3.2659	-6.1781	2.632	-11.29	-2.7493	-7.6397	4.3008	-1.7576	3.4263	-2.111e-09	-1.8232e-09	1.55e-09	-7.6324e-10	5.3488e-10	-1.0122e-09	7.0659e-10	-1.4717e-09	-3.8075e-10	-1.0893e-09	1.0051e-09	1.8508e-09	2.089e-09	1.3561e-09	4.3373e-10	-7.5846e-10	1.4918e-09	7.7078e-10	2.0845e-09	-2.0776e-10	-1.4841e-09	1.2369e-09	2.633e-09	-2.2184e-09	-8.4244e-10	2.1364e-10	1.0079e-10	-7.8452e-10	-1.4951e-09	-2.5875e-10	-3.655e-10	3.4283e-10
110080/JR2	-32.174	12.072	-4.0116	19.451	11.632	8.4161	-20.037	12.863	-3.1852	-1.8551	-1.48	-4.9189	0.66149	-5.3673	2.1583	-0.7438	4.4331	-2.3119e-09	-1.4094e-09	1.7153e-09	1.3291e-09	-5.4733e-10	3.2896e-09	-6.9495e-10	8.5633e-10	3.3238e-10	2.5121e-10	-6.6792e-10	-1.0173e-09	-1.4037e-09	-1.7696e-09	-9.0741e-10	9.9815e-10	-1.0839e-09	1.8253e-09	8.3139e-11	-2.5238e-09	6.3803e-10	-1.8053e-09	2.3301e-09	7.6102e-10	-1.7636e-09	1.6869e-09	-3.147e-10	-1.7127e-09	9.8894e-11	4.4447e-10	9.2656e-10	-1.8715e-09
110080/Liaoxing1	-26.436	14.891	4.006	-11.576	-6.1615	-2.768	-12.533	6.5631	-10.152	-0.048568	-14.526	-5.1301	-11.539	-9.619	5.0815	-1.753	1.7111	-2.2597e-09	-1.9072e-09	1.1258e-09	-4.7085e-10	-6.7245e-10	-1.3287e-09	-4.6795e-10	1.8967e-10	4.1893e-10	3.3844e-09	-2.33e-09	-2.5622e-11	-5.3656e-10	9.0226e-10	7.2955e-11	-2.1378e-10	3.7306e-10	-3.9605e-09	8.7759e-11	4.4585e-10	5.4204e-10	-2.1244e-10	5.606e-10	9.7417e-10	1.8841e-10	1.5793e-09	-4.6222e-10	1.6806e-09	3.3826e-09	-1.0641e-10	2.2874e-09	-7.2293e-12
110080/Mianhui725	-4.1721	4.7141	0.68297	9.4933	2.866	9.7762	-1.185	0.62499	-19.537	-6.2263	5.2631	-15.142	-8.877	-8.879	6.4689	-4.7218	2.3239	-2.1842e-09	-1.8977e-09	-3.08e-10	1.4843e-09	1.1187e-09	-3.322e-09	-1.2483e-09	-9.8746e-10	1.1574e-09	7.8351e-10	-1.2673e-09	-1.4424e-09	2.1615e-10	-9.9148e-10	3.1247e-09	1.0265e-09	7.6489e-10	1.2493e-11	-2.5878e-09	-4.9887e-10	-4.8128e-10	4.3952e-10	-1.3281e-09	1.3195e-09	-1.2316e-09	-5.8409e-10	2.206e-09	1.1892e-10	1.7521e-10	-6.4477e-10	-2.1308e-10	-2.4759e-09
110080/Qianlijing	-0.62214	9.6405	10.04	-7.147	2.082	10.819	-7.2278	21.316	2.8664	-15.197	1.549	-6.4228	-9.4308	-0.34788	10.701	-1.8503	3.4136	-8.9926e-10	-1.5545e-09	-7.2445e-10	9.4204e-10	3.5621e-10	-1.3839e-09	-1.474e-10	-3.6565e-10	-2.2069e-09	-1.5122e-09	3.3192e-11	1.5135e-09	2.1404e-09	-1.4896e-09	-2.0092e-09	-1.4953e-09	-2.1306e-09	8.2237e-10	1.1668e-09	6.3201e-10	8.8729e-10	3.9439e-10	-2.6683e-09	3.0083e-10	-1.1654e-09	1.6065e-09	1.2577e-10	-1.5699e-10	-2.6352e-10	9.6725e-10	-1.3325e-09	3.3782e-09
110080/R4115	-16.693	-5.7171	5.0181	-9.3195	6.7346	19.704	-7.0043	10.275	-14.102	0.93974	-10.22	-13.012	-1.6333	6.2373	0.069858	1.6951	3.9465	-1.4581e-09	-1.9037e-09	1.7617e-09	-1.5089e-09	6.2632e-10	-1.6031e-09	-5.3404e-10	-9.1893e-10	1.2398e-09	1.109e-09	-2.0096e-10	-1.209e-09	-1.4001e-09	2.3848e-09	1.5539e-09	6.2997e-10	1.443e-09	3.2874e-09	4.726e-10	1.2289e-10	8.6936e-11	7.1869e-10	-8.3174e-10	5.1289e-10	-8.4895e-10	-7.6146e-10	1.1954e-09	1.1084e-09	-2.1238e-10	2.6e-12	-6.3164e-10	-1.0062e-09
110080/R465	3.2019	9.9237	2.0191	-8.2049	-6.1268	3.0772	-12.244	23.337	-15.038	-0.19999	4.9061	-9.1164	3.8581	-8.9961	-3.566	0.87481	0.61261	-2.1573e-09	-1.8932e-09	-2.0058e-09	1.0577e-09	2.2817e-09	-2.2212e-11	-2.1282e-10	3.8173e-09	-3.6941e-10	-3.2371e-10	1.6693e-09	-1.8907e-09	1.952e-09	-2.3319e-10	-1.1579e-09	-1.3495e-09	-6.3703e-10	6.2081e-10	1.8093e-09	-1.0107e-09	-1.4887e-09	8.148e-10	-7.2479e-10	1.3298e-09	-1.751e-09	-8.6425e-10	4.123e-10	-4.5735e-10	1.7795e-09	-8.2239e-10	-3.3208e-10	-8.4895e-10
110080/WH1383	-12.503	7.8199	11.899	-14.57	11.623	7.4323	-16.105	1.619	2.6146	4.0496	7.1638	-17.72	-10.333	-9.1309	-3.6731	0.63942	1.5477	-1.9273e-09	-1.6796e-09	5.2547e-10	9.9475e-10	-3.1758e-09	-1.7007e-09	-8.835e-10	-1.5359e-10	-7.4898e-10	1.6842e-09	-5.2499e-10	2.1798e-09	-2.3024e-09	-8.4219e-11	-1.1117e-09	-7.9015e-10	1.0199e-09	-1.4563e-09	7.0711e-10	1.5876e-10	1.3609e-09	-1.9207e-10	-1.6103e-10	-2.0937e-09	9.9056e-10	1.7769e-11	-7.6764e-10	-6.0662e-10	8.5522e-12	-1.1805e-09	8.6783e-10	1.7668e-09
110080/WH1384	-17.489	11.37	3.0288	-15.067	3.1929	16.93	-8.3362	2.4037	-5.0462	-0.40908	0.1917	-5.7231	9.6893	-11.591	11.823	-3.3429	4.2307	-2.1906e-09	-1.8584e-09	2.0822e-12	4.6395e-10	5.5467e-10	8.9055e-10	9.0283e-10	-8.8356e-10	-8.57e-10	-1.8421e-09	-1.5976e-10	-8.1805e-10	-2.3503e-09	7.6714e-10	1.5358e-10	-1.9218e-09	3.8613e-10	-2.2686e-09	5.8097e-10	8.6634e-10	2.3286e-09	1.7854e-09	-2.6169e-11	7.5448e-11	9.9369e-10	1.9643e-09	1.3299e-09	-1.4371e-10	1.0085e-09	9.0464e-10	5.7367e-10	-1.3271e-09
110080/WH1390	-25.271	17.488	-7.752	-7.4821	-3.6958	7.8375	-13.955	3.4051	-5.7903	-13.788	0.38052	-15.465	1.3885	0.86594	2.6715	-1.4415	-9.3057	-2.2537e-09	-1.9718e-09	2.4463e-09	-4.2542e-10	-2.3177e-10	5.9788e-10	-7.4182e-10	-6.1014e-10	7.9316e-10	7.9379e-10	2.2307e-09	-1.7586e-09	1.2288e-09	2.2363e-10	1.9212e-09	5.397e-10	-1.1152e-09	2.3558e-13	-1.0761e-09	1.5648e-09	1.3314e-09	7.0787e-10	-1.399e-10	-5.1096e-10	1.2309e-09	3.0391e-10	-2.3517e-09	1.1874e-09	-9.7415e-10	1.5129e-09	-2.1336e-09	1.6239e-09
110080/WH1392	-22.955	18.03	-5.3117	-11.735	-2.3402	0.082376	-9.337	2.7455	-8.3106	-11.517	5.0645	-11.132	-0.89698	0.57627	-0.31273	0.77907	14.783	-1.9859e-09	1.3677e-08	2.3854e-09	-2.1054e-09	-9.9324e-10	-5.9395e-10	3.6577e-10	1.2919e-09	3.9545e-10	-7.7182e-10	3.9019e-10	2.4508e-09	-2.2319e-09	-4.5413e-10	8.5123e-10	-1.1839e-09	2.79e-10	-7.0295e-10	-1.1623e-10	4.82e-10	-1.0158e-09	-1.151e-09	1.2153e-09	4.9807e-10	1.4385e-09	-1.5706e-09	3.9175e-10	-1.6244e-09	-1.6938e-09	-5.8814e-11	7.5432e-10	5.94e-10
110080/WH1394	-26.977	18.753	-17.284	-2.5463	-8.3911	11.638	3.5605	14.894	0.49596	7.151	1.8199	-16.018	-5.1336	-3.5754	4.7071	-0.1313	2.6539	-2.1855e-09	-1.8601e-09	4.6329e-10	-4.9457e-10	7.0228e-10	1.8045e-09	-3.4818e-10	-3.0952e-10	-4.0181e-10	-2.952e-10	-6.9143e-10	5.8096e-10	2.0829e-09	1.4452e-09	-2.0936e-09	5.1442e-11	-1.505e-10	5.4016e-11	6.2538e-10	-3.9306e-10	-1.3442e-09	2.2004e-10	1.1922e-10	1.3872e-09	1.937e-09	1.0786e-09	-1.3342e-09	-7.4777e-10	-1.904e-09	1.1705e-09	2.9001e-09	8.3999e-10
110080/Wuyunjing8	-38.282	8.8816	28.003	3.8648	-15.44	9.7772	-7.6114	7.008	-6.9707	-0.12157	6.6352	-8.3984	-1.1084	-0.84339	3.5154	0.58781	2.0816	-1.9731e-09	1.3188e-08	3.3608e-10	-2.0407e-09	5.6973e-10	1.4261e-09	2.5202e-09	3.1847e-10	2.0994e-10	1.1466e-09	-3.0594e-10	2.8979e-09	-1.6311e-09	-1.3191e-09	7.217e-10	2.341e-09	-4.5079e-10	6.1142e-10	3.9473e-10	2.0415e-09	-1.6036e-09	5.5159e-10	1.4051e-09	-3.3655e-10	-1.0892e-09	1.4221e-09	-1.515e-10	1.6293e-09	-2.6972e-11	-1.275e-09	-1.6288e-09	2.5299e-10
110080/YB	-0.59318	5.2827	5.2952	0.58796	-5.3412	-1.9303	-16.804	7.8461	-3.2486	4.2045	-2.7002	-20.175	2.2248	2.2053	8.9171	-9.5346	4.7049	-2.1098e-09	-1.8434e-09	-4.1824e-09	1.6144e-09	-7.5554e-10	1.4474e-10	1.2587e-09	-9.6908e-10	2.353e-09	-6.736e-10	1.3932e-10	4.737e-10	9.7608e-10	1.4508e-09	-1.5494e-09	3.1117e-10	2.374e-09	-1.4008e-09	-1.1778e-09	1.9246e-10	-2.3297e-10	-1.0664e-10	-8.1678e-10	-1.9522e-09	-1.3361e-09	-2.0085e-09	-6.7075e-10	-3.8499e-10	4.2749e-10	-1.1478e-09	-2.4579e-09	-1.1353e-09
610234/110080	-0.96302	5.8387	-0.73274	0.5487	-5.5176	6.1314	-16.065	4.0403	-5.823	-0.90241	0.0041901	-13.704	-2.6859	-3.7582	11.515	15.369	2.9441	1.9799e-08	-2.2458e-09	-2.3619e-09	1.0511e-09	-3.6696e-10	1.6454e-09	-6.2918e-10	-1.3164e-09	1.5502e-10	-1.4112e-09	9.9464e-10	-2.1789e-09	1.9198e-09	-1.1571e-09	7.9171e-11	8.7441e-10	-2.3258e-09	1.8838e-09	-6.8558e-10	-1.161e-09	1.0389e-09	-1.56e-09	-9.4317e-10	1.2562e-10	1.8197e-09	-1.3578e-09	-1.1606e-09	-2.4019e-09	6.7466e-10	9.7418e-10	-1.0034e-09	-8.6143e-10
610234/9311K	30.316	1.0318	-11.765	4.3114	-14.061	8.5293	-14.801	-10.535	0.52696	5.8426	3.255	7.5822	-5.3134	3.8899	5.0877	12.214	0.32893	1.9136e-08	-2.2103e-09	6.1602e-10	4.3389e-10	2.8966e-09	-4.3065e-09	1.8438e-09	1.095e-09	-4.1325e-11	-1.7068e-09	-1.81e-10	2.2616e-09	-8.9797e-10	-1.1245e-09	-1.0884e-09	9.8579e-10	1.2513e-09	-9.4299e-10	-1.353e-09	-9.6387e-10	-9.7389e-10	-1.602e-09	3.2529e-10	9.0815e-10	-1.1492e-09	6.9937e-10	-1.6974e-09	-1.8293e-09	2.547e-09	-2.4283e-10	-2.8317e-10	-6.6941e-10
610234/Balilla	28.261	-1.2736	3.6357	12.832	-10.534	2.7862	0.67438	-7.3555	8.9781	-5.5916	-11.379	-7.0569	3.6824	-5.4746	0.20099	16.668	2.0282	-2.8854e-07	2.0757e-09	-2.501e-12	-2.0736e-12	-4.5371e-13	-1.5985e-13	-1.0647e-12	2.307e-12	-2.638e-12	4.7766e-13	1.0592e-12	-1.1832e-12	-1.4222e-12	-3.5322e-13	1.902e-12	4.9067e-14	-8.8415e-13	1.1356e-12	1.0613e-12	9.3161e-13	2.1547e-13	-1.2063e-12	6.6547e-13	4.9387e-13	9.9203e-13	-8.3111e-13	1.8403e-12	2.421e-13	7.4407e-13	-2.3993e-13	1.4918e-13	1.1425e-12
610234/C418	1.995	-42.082	-11.455	1.4579	-7.3491	-6.8208	-5.4317	-3.3061	3.5455	-0.92617	2.9044	-0.82518	-0.22243	-2.5373	7.8692	14.979	-0.33448	1.9163e-08	-2.1862e-09	-2.0055e-09	-8.0184e-10	6.1886e-10	1.7613e-09	-2.9632e-11	1.5327e-09	4.7295e-10	1.4719e-09	3.5476e-10	-2.6436e-09	-1.8198e-09	-2.1156e-09	1.3158e-09	9.9733e-10	-1.671e-09	-7.6247e-10	1.5615e-09	1.7989e-09	1.3985e-09	1.3031e-09	3.4801e-10	7.4409e-11	-9.4545e-10	-3.9074e-10	-8.4762e-10	7.2135e-10	5.7215e-11	1.1683e-10	1.9576e-09	-2.8698e-10
610234/JR2	-1.1746	2.5505	-7.7444	27.087	12.8	-4.1607	-12.829	-0.28335	3.6262	3.3969	-1.2076	5.546	3.1884	-0.26486	5.7267	15.993	0.67232	1.8999e-08	-1.7818e-09	-2.1956e-11	-6.2305e-10	8.2633e-10	-9.4344e-10	-1.132e-09	1.0792e-09	-3.212e-09	8.6072e-10	1.0381e-09	-2.418e-10	-1.9386e-09	2.6946e-09	1.1308e-09	6.8158e-10	-2.8904e-10	5.493e-10	1.1826e-09	-1.1625e-09	-2.4803e-10	1.5842e-10	1.3285e-09	5.6754e-10	-1.9117e-10	-3.2525e-10	8.3703e-10	-1.9031e-09	2.7338e-10	-5.1216e-10	2.5778e-10	8.3175e-10
610234/Liaoxing1	4.5635	5.3687	0.27321	-3.9403	-4.9934	-15.345	-5.3246	-6.5831	-3.3405	5.2034	-14.253	5.3347	-9.0118	-4.5165	8.6499	14.984	-2.0496	1.8976e-08	-2.3045e-09	-1.2651e-09	1.0592e-09	4.4566e-10	9.5531e-10	1.2814e-09	-2.5812e-09	-6.5353e-11	9.0902e-11	5.0031e-11	-6.8901e-10	1.4524e-09	-1.2859e-09	8.8949e-10	-2.1792e-09	1.2329e-09	2.7386e-09	4.7243e-10	1.5365e-09	1.6286e-10	1.2047e-09	2.5921e-10	-1.9032e-09	-1.4933e-09	1.6608e-09	1.3067e-09	-1.6526e-09	-9.8338e-10	-5.0874e-10	2.2742e-09	-4.8797e-10
610234/Mianhui725	26.827	-4.8077	-3.0498	17.129	4.0341	-2.8007	6.0238	-12.521	-12.726	-0.97439	5.5355	-4.6775	-6.3501	-3.7765	10.037	12.015	-1.4369	1.9074e-08	-2.2159e-09	1.4309e-09	-1.6739e-09	8.9213e-10	9.7061e-10	1.0882e-09	3.7249e-09	-1.0916e-09	-7.4464e-10	2.5732e-10	4.2001e-10	-8.7612e-10	2.5924e-09	-4.7966e-10	-4.4757e-11	5.8361e-10	-1.493e-09	8.1741e-10	6.7201e-10	1.5974e-09	-1.42e-09	1.0385e-09	9.1762e-10	-3.1458e-10	3.4323e-10	-1.1886e-09	2.2306e-09	-6.4145e-10	2.2451e-10	-1.1488e-09	1.2128e-09
610234/R4115	14.307	-15.239	1.2853	-1.6835	7.9027	7.1268	0.2044	-2.8709	-7.2908	6.1917	-9.9479	-2.5468	0.89353	11.34	3.6383	18.432	0.18575	1.9808e-08	-2.2856e-09	-1.0548e-09	4.4544e-10	-6.8168e-10	3.0094e-09	-1.2331e-09	1.275e-09	-9.6812e-11	-7.9516e-11	2.4005e-10	4.2789e-10	1.1299e-09	2.8749e-10	-8.1554e-10	-1.7704e-09	-9.3641e-10	-4.1674e-10	-2.805e-10	6.0937e-10	-1.5133e-09	2.035e-10	5.6476e-10	-1.9186e-09	2.523e-09	1.0508e-09	2.2221e-09	-1.9997e-10	-1.2742e-09	-3.7496e-10	-1.567e-09	1.4422e-09
610234/R465	34.201	0.40189	-1.7136	-0.56886	-4.9587	-9.4996	-5.0354	10.191	-8.2262	5.052	5.1785	1.3484	6.385	-3.8937	0.0023809	17.612	-3.1481	1.9063e-08	-2.2445e-09	1.8526e-09	4.4433e-10	-1.2276e-10	-1.8161e-09	-2.7311e-09	-1.6831e-09	-1.6573e-09	7.3725e-10	-3.8168e-09	1.9463e-09	1.1127e-09	2.9007e-09	-4.987e-10	8.6207e-10	-1.4742e-09	-3.1306e-11	-1.6915e-09	-7.2678e-10	1.7992e-09	-1.328e-09	1.2083e-09	2.8557e-10	-1.1595e-09	-1.0237e-09	3.1174e-09	2.0378e-09	3.6377e-10	-2.1184e-09	-5.6744e-10	7.102e-10
610234/WH1384	13.511	1.8479	-0.704	-7.4311	4.3611	4.3532	-1.1274	-10.743	1.7652	4.8429	0.46411	4.7417	12.216	-6.4888	15.392	13.394	0.46995	1.9038e-08	-2.2108e-09	1.1909e-09	-6.5807e-10	-6.9253e-10	-1.606e-10	-2.2129e-09	1.5327e-09	1.7841e-09	1.5434e-09	-8.8478e-10	1.2106e-09	3.5377e-10	1.2363e-09	-4.8874e-10	7.3931e-10	6.5994e-11	2.4616e-09	5.9152e-10	-3.23e-10	-2.59e-09	1.036e-09	-9.1245e-10	1.4979e-10	1.3501e-09	-2.521e-10	-2.5749e-09	-1.0612e-10	-1.2916e-09	-2.2909e-09	-5.8929e-10	-1.2914e-09
610234/WH1390	5.7289	7.9661	-11.485	0.15393	-2.5276	-4.7394	-6.7467	-9.7412	1.0211	-8.5365	0.65293	-5.0002	3.9153	5.9684	6.2399	15.295	-13.066	1.9004e-08	-2.2658e-09	-2.6297e-09	8.7833e-10	-2.8354e-09	1.0498e-09	-5.0117e-10	-1.3081e-09	3.001e-09	-1.8798e-09	-5.8189e-10	1.1471e-09	-4.641e-10	4.4984e-10	3.5539e-10	-5.0585e-10	1.0561e-09	-2.3291e-09	2.091e-09	3.7415e-10	-1.7064e-09	1.0612e-10	-1.9491e-10	1.4315e-09	1.7426e-09	1.8321e-09	1.1944e-09	1.1776e-10	-1.1802e-09	2.0291e-09	3.6058e-10	1.5366e-09
610234/WH1392	8.0443	8.5078	-9.0445	-4.0987	-1.1721	-12.494	-2.1283	-10.401	-1.4992	-6.2648	5.3369	-0.66668	1.6299	5.6787	3.2557	17.516	11.022	1.9218e-08	1.3352e-08	-1.6631e-10	6.6939e-10	-6.6859e-10	1.2719e-09	4.5349e-09	-3.8397e-10	1.264e-09	-5.9389e-10	-1.4568e-09	-5.704e-10	8.4196e-10	-2.9984e-09	-3.2428e-10	-2.1935e-09	4.1635e-10	1.3411e-09	-2.3312e-09	-5.5582e-10	-1.2005e-09	1.1006e-09	-9.0806e-10	-8.7448e-10	1.2232e-09	8.6175e-10	-1.4301e-09	9.6826e-10	3.0499e-09	-1.0491e-09	9.3305e-10	1.5276e-10
610234/WH1394	4.022	9.2316	-21.016	5.0897	-7.223	-0.93932	10.769	1.7475	7.3074	12.403	2.0923	-5.553	-2.6067	1.527	8.2755	16.606	-1.1069	1.9079e-08	-2.221e-09	4.8459e-10	-2.292e-09	-1.9581e-09	7.589e-10	-9.2781e-10	-2.1564e-09	-5.4035e-10	6.3785e-10	-1.2826e-09	-1.5331e-09	2.5025e-09	-1.7488e-09	1.3097e-09	8.1171e-10	1.0016e-09	-7.2088e-10	8.2243e-10	-2.5441e-10	1.4658e-09	1.088e-09	1.8069e-10	-9.7568e-10	-1.2213e-09	-1.6522e-09	1.4214e-09	8.2329e-10	-4.1685e-10	-1.4457e-09	-3.7837e-10	-1.4063e-09
610234/Wuyunjing8	-7.2823	-0.6402	24.271	11.501	-14.272	-2.7997	-0.4027	-6.1383	-0.15926	5.1304	6.9076	2.0664	1.4185	4.2591	7.0838	17.325	-1.6792	1.9255e-08	1.2902e-08	1.3112e-09	1.6e-10	8.397e-10	-7.3959e-10	2.0166e-09	-1.7178e-09	1.4939e-10	-4.2937e-10	1.7223e-09	-1.2369e-09	-1.6003e-09	-1.5709e-09	1.7348e-10	-7.8881e-10	3.4725e-11	-2.7698e-09	-1.9791e-10	-1.7711e-10	-1.2522e-09	-1.0473e-09	-1.4173e-09	2.4608e-09	-1.8679e-09	-1.3326e-09	4.0303e-10	-2.9046e-10	3.6132e-10	1.0344e-09	-1.066e-10	7.5261e-10
610234/YB	30.406	-4.2392	1.5625	8.224	-4.1731	-14.507	-9.5955	-5.3001	3.5628	9.4565	-2.4278	-9.7097	4.7517	7.3077	12.486	7.2023	0.94419	1.9121e-08	-2.193e-09	2.0753e-09	-2.9835e-10	8.5735e-10	-3.376e-09	-1.2791e-09	7.0657e-10	8.5957e-10	1.642e-09	2.8785e-09	1.5223e-09	-1.4609e-09	1.8791e-09	-1.5358e-09	1.0777e-09	1.3599e-09	1.0863e-09	-1.2587e-09	-2.7946e-10	2.0507e-09	5.1356e-10	-1.3381e-09	-1.0635e-09	-6.9463e-10	3.0711e-10	-1.6508e-09	1.3276e-09	-1.1261e-09	3.6482e-09	-3.6136e-11	-5.7199e-10
9311K/110080	-0.68354	10.554	-8.0319	-3.3246	-15.229	21.106	-22.01	2.6115	-6.2845	0.59066	2.9826	-2.8827	-7.8403	-1.2126	1.5193	-4.523	4.0897	-2.0439e-09	-1.8395e-09	-2.712e-09	-1.7417e-09	4.3982e-10	1.1768e-09	3.0623e-10	1.2471e-09	-2.1068e-09	-1.158e-09	-1.1465e-10	-1.6318e-09	-9.7332e-10	-7.7083e-10	-2.4127e-10	1.2102e-09	-4.1416e-10	1.5473e-10	-2.6542e-09	-7.8983e-10	-9.3242e-10	-1.9547e-09	-5.2439e-10	-3.7762e-10	1.3127e-09	-2.4785e-09	1.7683e-09	2.9543e-09	-1.0774e-09	-1.9372e-10	1.884e-09	9.3587e-10
9311K/610234	30.316	1.0318	-11.765	4.3114	-14.061	8.5293	-14.801	-10.535	0.52696	5.8426	3.255	7.5822	-5.3134	3.8899	5.0877	12.214	0.32893	1.9136e-08	-2.2103e-09	6.1602e-10	4.3389e-10	2.8966e-09	-4.3065e-09	1.8438e-09	1.095e-09	-4.1325e-11	-1.7068e-09	-1.81e-10	2.2616e-09	-8.9797e-10	-1.1245e-09	-1.0884e-09	9.8579e-10	1.2513e-09	-9.4299e-10	-1.353e-09	-9.6387e-10	-9.7389e-10	-1.602e-09	3.2529e-10	9.0815e-10	-1.1492e-09	6.9937e-10	-1.6974e-09	-1.8293e-09	2.547e-09	-2.4283e-10	-2.8317e-10	-6.6941e-10
9311K/Balilla	28.541	3.4413	-3.6635	8.9589	-20.246	17.761	-5.2704	-8.7842	8.5167	-4.0985	-8.4004	3.7643	-1.472	-2.929	-9.7942	-3.2232	3.1738	1.9824e-08	-2.3054e-09	1.0377e-10	5.8005e-10	1.9804e-09	-4.1694e-10	-3.4605e-10	2.894e-10	3.3992e-09	-3.7658e-11	3.1073e-10	2.0659e-09	1.1098e-09	4.475e-10	-9.8124e-10	2.0977e-09	-1.3526e-09	-8.5306e-10	2.144e-11	-1.0023e-09	-1.0002e-09	-2.5235e-10	-2.0647e-09	-3.9928e-09	1.5404e-09	-4.8268e-10	1.4518e-09	5.6861e-10	-8.4658e-10	1.8415e-09	1.4739e-09	8.6388e-10
9311K/C418	2.2745	-37.367	-18.754	-2.4154	-17.061	8.1538	-11.377	-4.7348	3.0841	0.5669	5.8828	9.996	-5.3769	0.0083267	-2.126	-4.9124	0.81114	-2.7744e-09	-1.754e-09	-1.5125e-09	-9.6501e-10	-1.6634e-11	1.8608e-09	-4.1681e-10	-9.2195e-10	-1.3656e-09	1.7331e-09	-4.2205e-10	1.2982e-09	1.0258e-09	1.8767e-10	1.2889e-09	1.0924e-09	1.9063e-09	-2.3901e-10	-5.7626e-10	-5.8034e-10	6.5636e-10	-1.3181e-09	3.4962e-10	1.5724e-09	-1.2962e-10	1.1925e-09	2.0228e-09	-1.7707e-09	1.0738e-09	9.0585e-10	5.3428e-10	3.6675e-10
9311K/JR2	-0.89516	7.2654	-15.044	23.213	3.0887	10.814	-18.773	-1.7121	3.1648	4.8899	1.7708	16.367	-1.9661	2.2807	-4.2685	-3.8986	1.8179	-2.8993e-09	-1.3591e-09	-7.1681e-10	-1.2955e-09	-1.0432e-09	1.5401e-09	1.9964e-09	-6.7088e-10	-1.6681e-10	1.2283e-09	3.996e-10	-2.7703e-11	-1.7963e-09	-9.8456e-11	2.1387e-09	5.7999e-10	-4.9258e-10	-2.2217e-10	2.2108e-09	1.0442e-09	-4.0481e-10	-1.0437e-09	6.2488e-10	1.0046e-09	1.5937e-09	-2.8362e-09	-2.5348e-09	5.0224e-10	4.3151e-10	-1.3003e-10	-3.5775e-10	-3.1378e-10
9311K/Liaoxing1	4.843	10.084	-7.026	-7.8135	-14.705	-0.37013	-11.269	-8.0119	-3.802	6.6965	-11.275	16.156	-14.166	-1.9709	-1.3453	-4.9077	-0.90399	-2.8884e-09	-1.8544e-09	-1.6824e-09	-1.7098e-09	-1.38e-09	-2.833e-13	7.3456e-10	4.3237e-10	-1.8924e-09	-1.6869e-09	-1.5436e-10	-5.9729e-10	-6.709e-10	7.3345e-10	-2.1315e-10	-6.9044e-10	-8.3215e-10	2.2259e-09	5.4881e-10	1.4593e-09	7.3927e-10	-5.5476e-10	-1.0139e-10	1.5562e-09	-1.1921e-09	1.2334e-09	-6.9046e-10	-1.8729e-09	-2.6692e-09	1.196e-09	-4.3216e-10	1.7198e-09
9311K/Mianhui725	27.107	-0.092848	-10.349	13.256	-5.6776	12.174	0.078968	-13.95	-13.187	0.51868	8.5139	6.1436	-11.505	-1.2309	0.042074	-7.8766	-0.29123	-2.8047e-09	-1.8031e-09	1.3646e-09	1.3597e-09	1.4757e-10	1.1244e-09	-9.9631e-10	5.8603e-11	9.8873e-10	2.7557e-09	-5.4619e-10	1.1151e-09	1.7636e-09	-2.1856e-09	-1.6424e-09	-5.0699e-10	2.2509e-10	-5.8813e-10	5.8554e-10	-1.4123e-09	2.147e-09	3.4046e-09	2.158e-09	1.9183e-09	7.0672e-10	-1.208e-10	7.1303e-10	-6.2347e-11	7.5667e-10	-1.0348e-10	-3.637e-09	2.8617e-10
9311K/Qianlijing	30.657	4.8335	-0.9916	-3.3843	-6.4616	13.216	-5.9638	6.7413	9.2164	-8.4515	4.7998	14.863	-12.058	7.3002	4.2742	-5.005	0.79851	-1.5649e-09	-1.46e-09	3.6112e-09	2.3555e-09	4.4062e-10	1.4224e-09	2.132e-11	-1.137e-09	8.6916e-10	-3.0756e-09	1.1562e-09	-4.0931e-10	-8.9871e-10	1.2557e-09	9.9005e-10	-8.2465e-10	-3.8181e-10	-1.1854e-09	-1.0263e-09	2.3132e-10	-2.0989e-09	1.0969e-09	3.0569e-09	1.3159e-09	-6.384e-10	-9.4053e-10	9.4519e-10	1.7672e-09	2.3166e-10	8.0978e-10	-2.9123e-10	-1.0611e-09
9311K/R4115	14.586	-10.524	-6.0138	-5.5567	-1.8091	22.101	-5.7404	-4.2997	-7.7523	7.6848	-6.9695	8.2744	-4.2609	13.885	-6.3569	-1.4596	1.3314	-2.0937e-09	-1.8272e-09	-1.1249e-09	3.7556e-10	-1.6256e-11	7.3065e-10	7.3049e-13	2.2622e-10	2.621e-10	-1.8099e-11	-2.812e-09	-1.1956e-10	2.1839e-09	2.84e-09	1.7314e-09	-1.5664e-09	3.1421e-09	-1.2104e-09	-1.888e-10	8.1792e-10	1.7788e-09	1.8206e-09	2.9391e-10	4.7323e-10	-8.8945e-10	-7.0064e-10	-1.3871e-09	-6.4154e-10	-1.2411e-09	2.7876e-10	3.1255e-10	6.0373e-10
9311K/R465	34.481	5.1168	-9.0128	-4.4421	-14.67	5.4751	-10.98	8.7623	-8.6876	6.545	8.157	12.17	1.2305	-1.3481	-9.9928	-2.2799	-2.0025	-2.8141e-09	-1.8074e-09	3.054e-09	1.0978e-09	3.5633e-09	6.5173e-10	-8.0056e-10	-1.1379e-09	-1.1616e-09	-2.8455e-09	-1.7571e-09	-1.7561e-10	-2.6006e-10	1.0201e-09	2.6403e-10	2.4127e-09	6.6175e-10	5.0767e-10	-1.0272e-09	-1.1524e-09	-7.4634e-10	7.9261e-10	-8.0796e-10	5.5208e-10	1.7718e-09	6.2401e-10	-3.2019e-09	-1.2869e-09	-6.3809e-10	5.3412e-10	-1.1614e-09	3.558e-11
9311K/WH1383	18.776	3.0129	0.86736	-10.807	3.0791	9.8301	-14.841	-12.956	8.9646	10.795	10.415	3.5661	-12.961	-1.4829	-10.1	-2.5153	-1.0674	-2.5456e-09	-1.5713e-09	1.0783e-09	-4.8497e-10	-1.6264e-09	8.5922e-10	-2.4531e-10	-1.5659e-09	9.3266e-10	-3.0282e-09	-7.4164e-10	-1.3701e-09	2.0386e-09	4.2918e-10	-3.9773e-11	-6.1518e-10	-2.3282e-09	1.817e-10	1.8967e-10	2.8402e-09	-8.1068e-10	-3.9388e-10	9.0184e-10	8.3466e-10	7.4708e-10	8.1622e-10	1.0398e-09	1.1624e-09	1.4051e-09	-2.8313e-09	-5.0017e-10	-8.0488e-10
9311K/WH1384	13.79	6.5628	-8.0032	-11.304	-5.3507	19.328	-7.0722	-12.171	1.3038	6.3359	3.4425	15.563	7.0617	-3.9432	5.3967	-6.4977	1.6156	-2.8327e-09	-1.7788e-09	-1.6536e-10	-1.3329e-09	-1.686e-09	-9.9442e-10	-2.6353e-09	-5.9042e-10	7.8275e-11	1.8015e-09	5.1453e-10	-1.4996e-09	8.7903e-10	-1.0656e-09	3.5577e-10	-1.2035e-09	-8.9933e-10	1.1074e-09	-6.434e-10	7.244e-10	2.6597e-10	-6.7496e-10	-6.0956e-10	-3.6537e-10	-1.0846e-09	-1.3477e-10	-7.2742e-10	2.5049e-09	-2.1031e-09	1.9182e-09	1.8713e-09	-1.3966e-09
9311K/WH1390	6.0084	12.681	-18.784	-3.7193	-12.239	10.235	-12.691	-11.17	0.55967	-7.0435	3.6314	5.821	-1.2391	8.514	-3.7553	-4.5963	-11.921	-2.879e-09	-1.8406e-09	-9.1205e-10	2.2022e-10	-5.5251e-10	-4.2149e-10	-1.9839e-10	2.6825e-09	-1.0361e-10	2.1788e-09	1.8398e-09	1.3517e-09	-5.7571e-10	-1.0644e-10	3.176e-10	-1.8961e-09	4.2911e-10	6.1153e-10	-6.4492e-10	4.591e-10	-4.0066e-10	1.9011e-09	4.2836e-12	1.3145e-09	-2.3908e-09	9.8382e-10	1.3426e-10	-1.3173e-09	6.7563e-11	1.2196e-09	2.6557e-09	3.0507e-10
9311K/WH1392	8.3238	13.223	-16.344	-7.9719	-10.884	2.4802	-8.073	-11.829	-1.9606	-4.7717	8.3153	10.154	-3.5245	8.2243	-6.7395	-2.3757	12.168	-2.6407e-09	1.3683e-08	-7.2883e-10	5.6997e-10	-1.037e-09	5.8409e-10	6.0554e-10	2.1108e-10	-7.2456e-10	5.2233e-10	-6.0343e-10	1.4374e-10	-1.0271e-09	6.3176e-10	-6.1257e-10	-9.1844e-10	-1.492e-09	2.2914e-09	1.1055e-09	1.42e-09	1.0549e-09	-6.5553e-10	-1.794e-09	-1.9551e-09	-9.1161e-10	1.1758e-10	9.7758e-10	7.2825e-10	8.6688e-10	-7.7662e-10	-3.4671e-12	-3.264e-09
9311K/WH1394	4.3015	13.946	-28.316	1.2164	-16.935	14.035	4.8245	0.31876	6.846	13.896	5.0707	5.2682	-7.7612	4.0726	-1.7197	-3.2861	0.038756	-2.8206e-09	-1.8249e-09	-9.4023e-10	-7.9812e-10	-2.0498e-09	-1.4143e-09	-1.9292e-09	1.4301e-10	-6.4839e-10	2.1503e-10	5.8224e-10	-6.3288e-10	-3.7429e-09	-1.9885e-09	-1.1445e-09	-9.2602e-12	-2.0457e-10	1.5284e-10	-7.6563e-12	-7.3858e-10	-4.472e-10	1.3657e-09	3.7625e-10	-1.5904e-09	-1.0897e-09	8.4766e-10	1.7482e-09	-1.6744e-09	-1.534e-09	-1.6958e-09	1.8262e-10	5.3363e-10
9311K/Wuyunjing8	-7.0028	4.0747	16.971	7.6275	-23.983	12.175	-6.3475	-7.5671	-0.62069	6.6235	9.886	12.888	-3.736	6.8047	-2.9114	-2.5669	-0.53356	-2.6105e-09	1.3304e-08	2.2211e-10	5.7122e-10	-2.1837e-09	-8.6541e-10	2.278e-09	4.9004e-10	-6.0126e-10	6.3397e-10	2.244e-09	-3.4819e-09	1.3382e-09	5.4888e-10	-9.8922e-10	5.0993e-10	2.5961e-09	-1.2942e-09	2.5489e-09	-2.2142e-09	2.0958e-10	-1.8862e-09	-3.3979e-09	-2.6998e-09	-2.3357e-10	6.284e-10	-3.1224e-10	6.0512e-11	1.3111e-09	-1.7073e-10	-1.8702e-09	1.924e-09
9311K/YB	30.686	0.47574	-5.7367	4.3507	-13.885	0.4675	-15.54	-6.7289	3.1014	10.95	0.55067	1.1114	-0.40273	9.8533	2.4903	-12.689	2.0898	-2.7484e-09	-1.7518e-09	4.4509e-10	7.6403e-10	2.1232e-09	-1.5309e-09	-2.1858e-10	-8.5131e-10	2.2822e-09	2.4881e-09	2.8534e-10	1.7094e-09	5.0424e-10	-7.5426e-10	-1.3394e-10	-6.5781e-10	-1.8144e-09	-6.9776e-10	9.1099e-10	-1.4278e-10	9.6328e-10	-4.5207e-11	1.209e-09	-4.6897e-10	2.0367e-09	5.5114e-10	-2.4975e-10	2.0687e-10	1.4182e-09	-2.5593e-09	-3.7779e-10	-6.4822e-11
Balilla/610234	28.261	-1.2736	3.6357	12.832	-10.534	2.7862	0.67438	-7.3555	8.9781	-5.5916	-11.379	-7.0569	3.6824	-5.4746	0.20099	16.668	2.0282	-2.8854e-07	2.0757e-09	-2.501e-12	-2.0736e-12	-4.5371e-13	-1.5985e-13	-1.0647e-12	2.307e-12	-2.638e-12	4.7766e-13	1.0592e-12	-1.1832e-12	-1.4222e-12	-3.5322e-13	1.902e-12	4.9067e-14	-8.8415e-13	1.1356e-12	1.0613e-12	9.3161e-13	2.1547e-13	-1.2063e-12	6.6547e-13	4.9387e-13	9.9203e-13	-8.3111e-13	1.8403e-12	2.421e-13	7.4407e-13	-2.3993e-13	1.4918e-13	1.1425e-12
Balilla/9311K	28.541	3.4413	-3.6635	8.9589	-20.246	17.761	-5.2704	-8.7842	8.5167	-4.0985	-8.4004	3.7643	-1.472	-2.929	-9.7942	-3.2232	3.1738	1.9824e-08	-2.3054e-09	1.0377e-10	5.8005e-10	1.9804e-09	-4.1694e-10	-3.4605e-10	2.894e-10	3.3992e-09	-3.7658e-11	3.1073e-10	2.0659e-09	1.1098e-09	4.475e-10	-9.8124e-10	2.0977e-09	-1.3526e-09	-8.5306e-10	2.144e-11	-1.0023e-09	-1.0002e-09	-2.5235e-10	-2.0647e-09	-3.9928e-09	1.5404e-09	-4.8268e-10	1.4518e-09	5.6861e-10	-8.4658e-10	1.8415e-09	1.4739e-09	8.6388e-10
Balilla/C418	0.21962	-39.672	-3.3538	6.1053	-13.534	2.4108	4.0987	-1.5556	11.535	-10.867	-8.751	-4.6431	3.619	-9.3562	-7.0127	-0.4578	2.5104	1.9869e-08	-2.2728e-09	3.244e-10	1.012e-09	-8.7812e-10	-1.1722e-09	-3.6221e-10	-1.6544e-09	-4.0885e-10	1.4561e-09	-6.736e-10	8.0707e-10	3.7199e-10	2.1146e-09	-6.7544e-10	-1.4429e-09	-4.8581e-10	1.9223e-09	1.5693e-09	2.9442e-09	-1.3462e-09	-2.2552e-09	-5.3009e-10	1.1815e-09	-2.0729e-09	-3.513e-09	-5.9617e-10	5.617e-10	1.9983e-09	-1.1345e-10	-2.7568e-10	-1.4441e-09
Balilla/JR2	-2.95	4.96	0.3568	31.734	6.616	5.0709	-3.2982	1.4672	11.616	-6.5443	-12.863	1.7281	7.0298	-7.0838	-9.1552	0.556	3.5172	1.9705e-08	-1.8829e-09	9.5478e-11	4.7114e-10	-9.4102e-10	8.4807e-10	-1.2614e-09	2.5002e-09	-1.3662e-09	-2.7281e-10	-1.9309e-09	-2.6171e-10	-5.1556e-10	-2.489e-09	1.3936e-09	-2.4385e-09	2.1598e-09	-3.8504e-10	3.7348e-11	-3.715e-10	6.9834e-10	1.4892e-10	1.6146e-09	-1.0087e-09	5.8288e-10	2.3979e-10	2.8007e-09	-3.2734e-10	7.2716e-10	2.0553e-09	-1.7694e-09	-1.0254e-10
Balilla/Liaoxing1	2.7881	7.7782	8.3744	0.70719	-11.178	-6.1132	4.2058	-4.8326	4.6492	-4.7378	-25.909	1.5168	-5.1704	-11.335	-6.2321	-0.45316	0.79525	1.9659e-08	-2.3503e-09	-2.0711e-10	1.1701e-09	-1.6231e-10	4.2137e-10	3.3761e-10	-1.1227e-09	-2.2996e-09	2.7128e-09	2.3732e-09	1.3462e-09	-1.6783e-09	3.2253e-10	-5.2659e-10	1.3131e-09	6.6882e-10	9.0122e-10	5.008e-10	7.8489e-11	-7.836e-10	-4.2272e-10	3.3508e-10	1.2031e-10	-3.6324e-10	-3.9604e-10	3.1382e-09	-6.0786e-10	7.8617e-10	-7.5232e-10	-7.1032e-10	-3.9613e-10
Balilla/Mianhui725	25.052	-2.3983	5.0514	21.777	-2.1504	6.431	15.554	-10.771	-4.7362	-10.916	-6.1199	-8.4954	-2.5086	-10.595	-4.8446	-3.422	1.408	1.9745e-08	-2.3448e-09	6.3623e-10	-3.0824e-09	8.6668e-10	1.8006e-09	-2.084e-09	1.6136e-09	5.9795e-10	-2.0492e-09	-2.1526e-09	-6.7949e-10	6.4068e-10	-2.5611e-10	-8.5213e-10	1.5568e-09	8.007e-10	1.162e-09	1.1716e-09	2.0112e-09	2.5072e-09	-7.7782e-10	-2.3749e-09	-2.267e-09	-1.2403e-10	1.9893e-10	-1.6361e-09	-1.0989e-09	1.4811e-09	-1.4173e-09	1.8252e-09	-2.0092e-10
Balilla/R465	32.426	2.8114	6.3875	4.0786	-11.143	-0.26802	4.495	11.942	-0.23647	-4.8892	-6.4768	-2.4695	10.226	-10.713	-14.88	2.1746	-0.30329	1.9728e-08	-2.3173e-09	7.5281e-10	-4.3037e-09	-2.89e-10	1.8172e-09	-1.6985e-09	-6.0413e-11	-3.9563e-10	-1.3192e-09	7.7922e-10	-6.0196e-10	1.9696e-09	-4.2899e-10	7.0693e-11	-1.576e-09	2.4454e-09	-1.635e-09	-4.7389e-09	8.8842e-11	-2.3536e-10	1.1787e-09	5.7962e-10	1.8663e-09	-8.6042e-10	-6.0988e-10	-1.6734e-09	4.6122e-10	1.1351e-09	6.3582e-10	1.5628e-09	3.4944e-10
Balilla/WH1383	16.721	0.70751	16.268	-2.2867	6.6064	4.087	0.63377	-9.7767	17.416	-0.63963	-4.2192	-11.073	-3.965	-10.847	-14.987	1.9392	0.63183	2.0045e-08	-2.0804e-09	-4.0656e-10	2.7915e-09	-1.7679e-09	-7.6807e-11	2.738e-10	1.4262e-09	-6.2778e-10	8.839e-10	2.5969e-09	1.5376e-09	1.0267e-09	-2.1015e-09	1.0863e-09	2.363e-09	1.1008e-09	-2.2803e-09	-1.2857e-09	-2.3987e-09	2.8287e-10	-8.8193e-10	-6.2506e-10	3.9685e-10	1.3924e-09	4.0939e-10	-1.2084e-09	-1.085e-09	-1.1121e-09	-2.1911e-09	2.8572e-09	-1.5958e-09
Balilla/WH1384	11.735	4.2574	7.3972	-2.7837	-1.8235	13.585	8.403	-8.992	9.755	-5.0983	-11.191	0.92384	16.058	-13.308	0.50998	-2.0431	3.3148	1.9774e-08	-2.2327e-09	-6.6663e-10	-1.5882e-09	-2.867e-10	1.217e-10	4.3743e-10	-3.933e-10	2.1556e-09	-9.9646e-10	-6.1129e-10	-1.8003e-10	5.6704e-10	-1.5413e-09	3.203e-09	1.555e-09	-1.6239e-09	-4.8791e-10	-2.635e-10	-8.4927e-10	4.3325e-10	2.8635e-10	-6.4519e-10	1.9192e-09	-1.234e-09	1.6983e-09	-6.2748e-10	-1.6152e-09	-2.0485e-09	-1.9374e-09	-5.1935e-10	2.756e-09
Balilla/WH1390	3.9535	10.376	-3.3835	4.8014	-8.7121	4.4922	2.7837	-7.9907	9.0108	-18.478	-11.002	-8.818	7.7568	-0.85051	-8.642	-0.14171	-10.222	1.9672e-08	-2.3804e-09	1.3826e-09	7.566e-10	-7.3164e-10	-2.8508e-10	6.2524e-10	-2.7289e-10	4.043e-10	-1.6554e-09	1.0581e-09	9.0502e-10	-2.5814e-09	1.162e-09	3.529e-10	-6.7271e-10	-4.7584e-10	4.467e-10	1.1673e-10	-4.6643e-10	-2.8006e-09	2.2212e-09	-2.6657e-09	1.1301e-09	2.957e-10	-4.0519e-10	-3.8094e-10	3.5189e-10	1.1748e-11	-2.0699e-09	-2.303e-09	4.2104e-10
Balilla/WH1392	6.269	10.917	-0.94332	0.54879	-7.3566	-3.2629	7.4021	-8.6502	6.4905	-16.206	-6.3185	-4.4846	5.4713	-1.1402	-11.626	2.0789	13.867	1.9906e-08	1.3259e-08	8.0568e-11	1.9011e-09	-7.2107e-10	-1.0847e-09	2.4821e-09	-7.9012e-10	1.7404e-09	1.0294e-09	-1.3194e-09	1.0005e-09	-2.643e-10	1.8843e-09	-1.9746e-10	-2.2316e-10	-1.9124e-09	2.0226e-10	-2.2637e-11	-1.6641e-09	2.5505e-09	5.6673e-11	1.3092e-09	9.6437e-10	1.4223e-09	8.1705e-10	-5.1043e-10	7.2622e-10	-6.243e-10	7.9738e-10	-1.1776e-09	1.4122e-09
Balilla/WH1394	2.2466	11.641	-12.915	9.7371	-13.407	8.2923	20.3	3.498	15.297	2.4618	-9.5631	-9.3709	1.2347	-5.2919	-6.6064	1.1685	1.738	1.9709e-08	-2.3824e-09	-3.8947e-10	1.0772e-09	9.5648e-10	-1.2955e-09	3.2818e-09	-5.6295e-12	5.1402e-10	1.9534e-10	-5.8857e-10	-3.0569e-09	3.5411e-10	1.8609e-10	-1.2308e-09	1.5345e-09	7.0296e-10	3.8613e-12	2.5439e-10	2.4984e-10	-1.1011e-09	3.0614e-09	2.4223e-09	-3.3846e-10	-2.4614e-09	-1.3266e-09	8.5837e-10	-5.7386e-10	-1.6983e-09	-5.437e-10	2.958e-10	1.3318e-09
Balilla/Wuyunjing8	-9.0577	1.7693	32.372	16.148	-20.456	6.4319	9.1277	-4.3878	7.8305	-4.8108	-4.7478	-1.7515	5.2599	-2.5598	-7.7981	1.8876	1.1657	2.0033e-08	1.2834e-08	5.5998e-10	1.3023e-09	-6.758e-10	4.8045e-10	-1.7857e-09	-1.0855e-09	-4.1903e-09	6.7231e-10	-6.2496e-10	-3.0391e-09	-1.0009e-09	1.2166e-09	-1.2166e-09	-1.1138e-09	-8.9634e-10	8.0271e-11	2.3028e-09	9.9783e-10	-4.4484e-10	-1.2449e-09	-1.1748e-10	-4.9785e-10	8.2736e-10	2.3259e-09	2.6768e-10	1.1305e-09	-1.1025e-09	2.4574e-09	-9.8337e-10	-8.4335e-10
Balilla/YB	28.631	-1.8297	9.6636	12.871	-10.358	-5.2756	-0.065077	-3.5496	11.553	-0.48467	-14.083	-13.528	8.5931	0.48881	-2.3964	-8.2348	3.789	1.985e-08	-2.2651e-09	-2.3087e-09	-2.6145e-09	2.8775e-09	-1.2919e-09	2.6215e-10	-7.9868e-10	6.2657e-10	-1.1197e-10	1.0627e-09	-1.7222e-10	-5.1155e-10	-3.6061e-10	-4.3377e-11	-2.4579e-09	-1.3675e-09	7.5717e-10	1.2586e-10	4.4934e-10	6.8661e-10	-1.1892e-09	2.4415e-09	5.4712e-11	9.5573e-10	1.6181e-09	-1.2397e-09	1.2885e-09	8.2336e-10	1.5216e-09	-4.3232e-11	-1.7778e-09
C418/110080	-29.004	-32.56	-7.7223	-6.1781	-8.5172	5.756	-12.64	9.8402	-3.2659	-6.1781	2.632	-11.29	-2.7493	-7.6397	4.3008	-1.7576	3.4263	-2.111e-09	-1.8232e-09	1.55e-09	-7.6324e-10	5.3488e-10	-1.0122e-09	7.0659e-10	-1.4717e-09	-3.8075e-10	-1.0893e-09	1.0051e-09	1.8508e-09	2.089e-09	1.3561e-09	4.3373e-10	-7.5846e-10	1.4918e-09	7.7078e-10	2.0845e-09	-2.0776e-10	-1.4841e-09	1.2369e-09	2.633e-09	-2.2184e-09	-8.4244e-10	2.1364e-10	1.0079e-10	-7.8452e-10	-1.4951e-09	-2.5875e-10	-3.655e-10	3.4283e-10
C418/610234	1.995	-42.082	-11.455	1.4579	-7.3491	-6.8208	-5.4317	-3.3061	3.5455	-0.92617	2.9044	-0.82518	-0.22243	-2.5373	7.8692	14.979	-0.33448	1.9163e-08	-2.1862e-09	-2.0055e-09	-8.0184e-10	6.1886e-10	1.7613e-09	-2.9632e-11	1.5327e-09	4.7295e-10	1.4719e-09	3.5476e-10	-2.6436e-09	-1.8198e-09	-2.1156e-09	1.3158e-09	9.9733e-10	-1.671e-09	-7.6247e-10	1.5615e-09	1.7989e-09	1.3985e-09	1.3031e-09	3.4801e-10	7.4409e-11	-9.4545e-10	-3.9074e-10	-8.4762e-10	7.2135e-10	5.7215e-11	1.1683e-10	1.9576e-09	-2.8698e-10
C418/9311K	2.2745	-37.367	-18.754	-2.4154	-17.061	8.1538	-11.377	-4.7348	3.0841	0.5669	5.8828	9.996	-5.3769	0.0083267	-2.126	-4.9124	0.81114	-2.7744e-09	-1.754e-09	-1.5125e-09	-9.6501e-10	-1.6634e-11	1.8608e-09	-4.1681e-10	-9.2195e-10	-1.3656e-09	1.7331e-09	-4.2205e-10	1.2982e-09	1.0258e-09	1.8767e-10	1.2889e-09	1.0924e-09	1.9063e-09	-2.3901e-10	-5.7626e-10	-5.8034e-10	6.5636e-10	-1.3181e-09	3.4962e-10	1.5724e-09	-1.2962e-10	1.1925e-09	2.0228e-09	-1.7707e-09	1.0738e-09	9.0585e-10	5.3428e-10	3.6675e-10
C418/Balilla	0.21962	-39.672	-3.3538	6.1053	-13.534	2.4108	4.0987	-1.5556	11.535	-10.867	-8.751	-4.6431	3.619	-9.3562	-7.0127	-0.4578	2.5104	1.9869e-08	-2.2728e-09	3.244e-10	1.012e-09	-8.7812e-10	-1.1722e-09	-3.6221e-10	-1.6544e-09	-4.0885e-10	1.4561e-09	-6.736e-10	8.0707e-10	3.7199e-10	2.1146e-09	-6.7544e-10	-1.4429e-09	-4.8581e-10	1.9223e-09	1.5693e-09	2.9442e-09	-1.3462e-09	-2.2552e-09	-5.3009e-10	1.1815e-09	-2.0729e-09	-3.513e-09	-5.9617e-10	5.617e-10	1.9983e-09	-1.1345e-10	-2.7568e-10	-1.4441e-09
C418/JR2	-29.216	-35.848	-14.734	20.36	9.8009	-4.5361	-9.4043	5.5166	6.1834	-1.8788	1.4202	7.9598	3.1249	-4.1464	-1.487	-1.1332	1.1545	-2.9118e-09	-1.3541e-09	2.0324e-09	9.3049e-10	-2.0466e-09	-5.4515e-10	9.3412e-10	1.6629e-09	1.8803e-09	-8.3172e-10	3.0304e-09	-1.5496e-09	2.1307e-09	1.7999e-09	-1.339e-09	1.821e-10	1.4621e-09	-4.463e-10	-2.6045e-09	1.0844e-09	-1.441e-10	7.4028e-10	-9.3303e-10	1.0284e-09	-1.624e-09	-5.1531e-11	9.6365e-10	1.0474e-09	-3.2054e-11	-4.9836e-10	-1.0199e-09	-4.8049e-10
C418/Liaoxing1	-23.478	-33.03	-6.7163	-10.667	-7.993	-15.72	-1.9003	-0.78324	-0.7834	-0.07233	-11.626	7.7486	-9.0752	-8.3981	1.4362	-2.1423	-1.5674	-2.9026e-09	-1.8692e-09	1.1375e-09	6.9752e-10	1.0324e-09	-5.3961e-10	-5.8586e-10	1.8562e-09	2.4911e-10	-1.2561e-09	1.3877e-09	-7.3264e-10	-3.4129e-10	-6.4435e-10	1.69e-09	-8.4612e-10	-7.6526e-10	7.2337e-11	4.5349e-10	-2.3547e-09	9.5659e-11	4.2945e-10	8.0167e-10	-2.6407e-09	3.1025e-10	9.2385e-10	-1.0462e-09	3.6516e-09	-7.9049e-10	-1.6108e-09	2.541e-10	5.0506e-10
C418/Mianhui725	-1.2141	-43.206	-10.039	10.403	1.0345	-3.1761	9.448	-6.7214	-10.169	-6.2501	8.1633	-2.2637	-6.4135	-7.6581	2.8236	-5.1112	-0.95464	-2.8274e-09	-1.7935e-09	-1.1017e-09	-2.6401e-10	2.0655e-09	4.6669e-10	-1.217e-09	-1.8222e-09	4.3552e-09	-1.2218e-10	3.4826e-10	-1.1206e-09	-1.4108e-09	1.3353e-09	-1.2287e-09	-2.8491e-10	-2.5369e-09	-1.2235e-09	-2.3909e-09	3.0391e-09	3.7938e-10	-2.7665e-09	-7.8489e-10	-5.0471e-10	-1.414e-09	9.6259e-10	1.1636e-10	-3.548e-09	-1.0964e-09	6.9447e-10	-8.748e-10	-1.2573e-09
C418/Qianlijing	2.3359	-38.28	-0.68195	-6.2378	0.25058	-2.1337	3.4053	13.97	12.235	-15.22	4.4492	6.4559	-6.9674	0.87303	7.0558	-2.2397	0.1351	-1.5308e-09	-1.4874e-09	-1.0138e-09	-5.5813e-10	1.7539e-09	-1.4312e-09	2.1453e-10	2.2089e-09	-3.1303e-09	1.2694e-09	-1.1161e-09	1.8834e-10	1.8831e-09	6.7465e-10	-1.4961e-09	-1.6957e-09	1.8815e-11	-2.9043e-09	4.3863e-10	-1.134e-09	7.7473e-11	3.3738e-10	1.146e-09	6.9375e-10	3.9232e-10	6.7697e-10	-8.9544e-11	-7.9415e-10	-1.8987e-09	-1.9865e-09	-8.7999e-10	-1.3796e-09
C418/R4115	-13.735	-53.638	-5.7042	-8.4103	4.9031	6.7514	3.6287	2.929	-4.7337	0.91597	-7.3201	-0.13294	0.83011	7.4582	-3.5754	1.3058	0.66796	-2.0783e-09	-1.8111e-09	2.8322e-10	-7.9505e-10	-4.6357e-09	-1.0614e-09	-1.3548e-09	-1.3894e-09	-9.2627e-10	-1.125e-10	2.4639e-10	-2.63e-10	-6.2398e-10	-1.494e-09	-2.981e-09	2.0656e-09	-6.185e-10	3.9453e-10	-1.081e-09	1.2766e-09	-8.6434e-10	-4.6978e-10	3.362e-10	7.3284e-10	6.5029e-10	-1.8672e-09	-7.9734e-10	-1.8384e-09	2.2966e-09	3.7085e-10	-2.1602e-09	2.145e-09
C418/R465	6.1599	-37.997	-8.7031	-7.2957	-7.9583	-9.875	-1.6111	15.991	-5.6691	-0.22375	7.8063	3.7622	6.3216	-7.7752	-7.2113	0.48544	-2.6659	-2.8281e-09	-1.7923e-09	-3.8618e-09	2.7386e-09	5.1501e-10	9.3983e-10	-9.0751e-10	-1.1624e-10	1.4958e-09	4.8405e-10	1.3191e-10	8.1224e-10	-1.7271e-09	-2.0134e-09	-1.5844e-09	-3.5089e-10	3.7662e-10	-1.2492e-09	1.2658e-09	1.8142e-09	1.2308e-09	1.4554e-10	1.1173e-09	-5.2391e-11	-1.5582e-10	1.9406e-09	-1.1637e-09	1.9997e-09	-4.5217e-10	-5.6374e-10	-1.5732e-09	-1.3157e-09
C418/WH1383	-9.5451	-40.101	1.177	-13.661	9.7913	-5.52	-5.4723	-5.7274	11.983	4.0258	10.064	-4.8412	-7.8698	-7.91	-7.3184	0.25005	-1.7308	-2.5134e-09	-1.5807e-09	-1.782e-10	-2.4609e-09	-5.4152e-12	-4.2915e-10	1.2318e-09	-4.9002e-10	-1.1526e-09	9.409e-11	-8.0686e-11	1.2355e-09	-1.6607e-09	1.4049e-09	1.9928e-09	9.692e-10	-4.7298e-10	1.9965e-09	-1.9982e-09	1.0048e-09	-1.1189e-10	2.2947e-09	-2.1902e-09	-9.8948e-10	2.2866e-09	9.2907e-10	7.7715e-10	2.4774e-10	-3.561e-10	7.5525e-10	-1.2834e-09	1.7509e-09
C418/WH1384	-14.531	-36.551	-7.6935	-14.158	1.3614	3.9778	2.2969	-4.9426	4.3224	-0.43284	3.0919	7.1555	12.153	-10.37	8.1782	-3.7323	0.95216	-2.8622e-09	-1.8311e-09	4.1413e-10	7.005e-10	1.0693e-10	1.4697e-09	1.4874e-09	-1.3522e-10	-9.5179e-10	-8.5901e-10	-3.6041e-10	1.0855e-09	-7.9853e-10	-1.2498e-09	-1.3101e-09	-6.9095e-10	8.5904e-10	-3.7698e-10	-1.2421e-09	-1.3863e-09	-1.81e-09	1.9443e-11	-2.383e-09	-8.3718e-10	-2.8509e-10	5.1641e-10	4.1471e-10	2.6498e-10	-2.1366e-09	-7.7132e-10	-2.5694e-10	-1.3896e-09
C418/WH1390	-22.313	-30.432	-18.474	-6.5729	-5.5272	-5.1148	-3.3224	-3.9413	3.5782	-13.812	3.2807	-2.5863	3.8519	2.0868	-0.97379	-1.8309	-12.584	-2.8976e-09	-1.8556e-09	2.6366e-09	-8.0693e-11	-1.319e-09	-4.4053e-10	3.2669e-10	-1.7445e-09	1.0736e-10	2.8914e-10	-1.9135e-09	-2.1892e-09	7.65e-11	-1.2612e-09	3.3611e-10	1.1029e-09	2.3043e-10	4.811e-10	7.0928e-10	-1.7078e-09	-4.2876e-10	-3.915e-09	1.5014e-09	-9.5236e-10	1.5194e-09	8.8595e-10	-9.7354e-10	3.0579e-10	4.3784e-10	6.5812e-10	4.6476e-10	6.6381e-10
C418/WH1392	-19.997	-29.891	-16.034	-10.825	-4.1717	-12.87	1.296	-4.6008	1.0579	-11.54	7.9647	1.7471	1.5665	1.7972	-3.958	0.3897	11.505	-2.6222e-09	1.3717e-08	1.1721e-09	-3.0611e-10	1.4184e-10	-1.865e-09	-2.9329e-09	8.1832e-10	2.9911e-10	6.5715e-10	-8.7634e-10	-1.6647e-10	-6.2359e-10	-1.2607e-09	1.4613e-09	8.7179e-10	9.3652e-10	7.2046e-10	1.845e-09	-1.2894e-09	-1.1435e-09	5.347e-10	-1.7708e-09	-3.2766e-10	3.8729e-10	-6.195e-10	8.0986e-10	-1.2653e-09	6.6845e-10	1.5156e-09	3.3698e-09	1.1694e-09
C418/WH1394	-24.019	-29.167	-28.006	-1.6371	-10.223	-1.3147	14.194	7.5474	9.8645	7.1272	4.7201	-3.1392	-2.6702	-2.3545	1.0619	-0.52067	-0.62465	-2.8503e-09	-1.8192e-09	1.379e-09	2.2553e-10	1.1614e-09	-8.4276e-10	1.5977e-09	-2.2682e-09	-5.0621e-10	-2.2846e-09	6.5902e-12	-1.5784e-09	1.5226e-09	5.6723e-10	1.4544e-09	-2.875e-09	5.4451e-10	-6.3815e-10	1.2669e-09	-2.2126e-09	1.7006e-09	3.2168e-10	-1.2576e-09	1.5416e-09	1.277e-09	-7.4288e-10	2.8261e-10	7.0575e-10	8.3997e-10	1.3042e-09	-2.1887e-11	-8.0895e-10
C418/Wuyunjing8	-35.324	-39.039	17.281	4.774	-17.271	-3.1751	3.0216	-0.3384	2.3979	-0.14533	9.5354	4.4802	1.355	0.37753	-0.1299	0.19844	-1.197	-2.5947e-09	1.3262e-08	8.0671e-11	3.2039e-10	-1.776e-09	-5.2196e-10	8.0643e-10	2.844e-09	-9.1698e-10	-2.8765e-09	9.1516e-10	3.3685e-09	7.6188e-10	1.7879e-09	1.4019e-09	9.0673e-10	-1.3971e-09	-4.3004e-12	-9.9853e-10	-1.1061e-09	7.3132e-10	1.8238e-09	1.787e-09	8.0885e-10	-3.0546e-10	-6.1574e-11	7.6529e-10	3.7088e-10	1.1469e-09	-8.5966e-10	1.691e-09	2.8849e-10
C418/YB	2.3648	-42.638	-5.427	1.4972	-7.1727	-14.883	-6.1712	0.49979	6.12	4.1808	0.20003	-7.2959	4.6883	3.4262	5.2718	-9.924	1.4264	-2.7275e-09	-1.7489e-09	-1.3365e-09	3.7003e-10	2.7467e-09	3.3629e-09	5.0137e-10	1.091e-09	8.7943e-10	1.9769e-09	-1.9836e-09	-4.0283e-10	-8.5573e-10	-1.1893e-09	-7.6026e-10	7.5679e-10	1.2146e-10	1.4863e-09	-3.0283e-10	-9.8321e-10	1.0628e-09	1.5377e-09	-1.7037e-10	8.8908e-10	9.5167e-10	-9.9522e-10	-7.392e-10	1.2411e-10	-2.6138e-10	3.4133e-10	4.3983e-10	1.1306e-09
JR2/110080	-32.174	12.072	-4.0116	19.451	11.632	8.4161	-20.037	12.863	-3.1852	-1.8551	-1.48	-4.9189	0.66149	-5.3673	2.1583	-0.7438	4.4331	-2.3119e-09	-1.4094e-09	1.7153e-09	1.3291e-09	-5.4733e-10	3.2896e-09	-6.9495e-10	8.5633e-10	3.3238e-10	2.5121e-10	-6.6792e-10	-1.0173e-09	-1.4037e-09	-1.7696e-09	-9.0741e-10	9.9815e-10	-1.0839e-09	1.8253e-09	8.3139e-11	-2.5238e-09	6.3803e-10	-1.8053e-09	2.3301e-09	7.6102e-10	-1.7636e-09	1.6869e-09	-3.147e-10	-1.7127e-09	9.8894e-11	4.4447e-10	9.2656e-10	-1.8715e-09
JR2/610234	-1.1746	2.5505	-7.7444	27.087	12.8	-4.1607	-12.829	-0.28335	3.6262	3.3969	-1.2076	5.546	3.1884	-0.26486	5.7267	15.993	0.67232	1.8999e-08	-1.7818e-09	-2.1956e-11	-6.2305e-10	8.2633e-10	-9.4344e-10	-1.132e-09	1.0792e-09	-3.212e-09	8.6072e-10	1.0381e-09	-2.418e-10	-1.9386e-09	2.6946e-09	1.1308e-09	6.8158e-10	-2.8904e-10	5.493e-10	1.1826e-09	-1.1625e-09	-2.4803e-10	1.5842e-10	1.3285e-09	5.6754e-10	-1.9117e-10	-3.2525e-10	8.3703e-10	-1.9031e-09	2.7338e-10	-5.1216e-10	2.5778e-10	8.3175e-10
JR2/9311K	-0.89516	7.2654	-15.044	23.213	3.0887	10.814	-18.773	-1.7121	3.1648	4.8899	1.7708	16.367	-1.9661	2.2807	-4.2685	-3.8986	1.8179	-2.8993e-09	-1.3591e-09	-7.1681e-10	-1.2955e-09	-1.0432e-09	1.5401e-09	1.9964e-09	-6.7088e-10	-1.6681e-10	1.2283e-09	3.996e-10	-2.7703e-11	-1.7963e-09	-9.8456e-11	2.1387e-09	5.7999e-10	-4.9258e-10	-2.2217e-10	2.2108e-09	1.0442e-09	-4.0481e-10	-1.0437e-09	6.2488e-10	1.0046e-09	1.5937e-09	-2.8362e-09	-2.5348e-09	5.0224e-10	4.3151e-10	-1.3003e-10	-3.5775e-10	-3.1378e-10
JR2/Balilla	-2.95	4.96	0.3568	31.734	6.616	5.0709	-3.2982	1.4672	11.616	-6.5443	-12.863	1.7281	7.0298	-7.0838	-9.1552	0.556	3.5172	1.9705e-08	-1.8829e-09	9.5478e-11	4.7114e-10	-9.4102e-10	8.4807e-10	-1.2614e-09	2.5002e-09	-1.3662e-09	-2.7281e-10	-1.9309e-09	-2.6171e-10	-5.1556e-10	-2.489e-09	1.3936e-09	-2.4385e-09	2.1598e-09	-3.8504e-10	3.7348e-11	-3.715e-10	6.9834e-10	1.4892e-10	1.6146e-09	-1.0087e-09	5.8288e-10	2.3979e-10	2.8007e-09	-3.2734e-10	7.2716e-10	2.0553e-09	-1.7694e-09	-1.0254e-10
JR2/C418	-29.216	-35.848	-14.734	20.36	9.8009	-4.5361	-9.4043	5.5166	6.1834	-1.8788	1.4202	7.9598	3.1249	-4.1464	-1.487	-1.1332	1.1545	-2.9118e-09	-1.3541e-09	2.0324e-09	9.3049e-10	-2.0466e-09	-5.4515e-10	9.3412e-10	1.6629e-09	1.8803e-09	-8.3172e-10	3.0304e-09	-1.5496e-09	2.1307e-09	1.7999e-09	-1.339e-09	1.821e-10	1.4621e-09	-4.463e-10	-2.6045e-09	1.0844e-09	-1.441e-10	7.4028e-10	-9.3303e-10	1.0284e-09	-1.624e-09	-5.1531e-11	9.6365e-10	1.0474e-09	-3.2054e-11	-4.9836e-10	-1.0199e-09	-4.8049e-10
JR2/Liaoxing1	-26.648	11.602	-3.0056	14.962	12.157	-13.06	-9.2972	2.2395	-0.70269	4.2507	-15.738	14.12	-5.6644	-6.1257	-0.70635	-1.1285	-0.5606	-3.1167e-09	-1.5032e-09	1.735e-09	2.3915e-09	5.566e-10	1.146e-09	-4.3782e-10	-8.642e-11	3.9273e-09	-1.7408e-11	-1.1257e-09	3.105e-10	1.6432e-09	-1.8722e-09	6.5641e-12	2.2259e-09	-9.1433e-10	-1.1208e-09	7.7447e-10	-9.5988e-10	-2.9863e-10	-4.1896e-10	4.3204e-11	1.6137e-09	-1.399e-09	6.4729e-10	8.9323e-10	1.7029e-09	-1.7944e-09	8.7637e-10	2.776e-10	4.7985e-10
JR2/Mianhui725	-4.3837	1.4259	-6.3286	36.031	21.184	-0.51596	2.0512	-3.6986	-10.088	-1.9271	4.0513	4.1074	-3.0027	-5.3857	0.68106	-4.0974	0.052155	-3.0077e-09	-1.4258e-09	8.5556e-10	-4.6198e-10	3.4307e-10	-2.6538e-09	2.9816e-09	-7.7164e-10	-4.6509e-10	-1.0758e-09	9.2938e-10	-5.8962e-10	6.8837e-10	-2.9092e-10	-1.3227e-09	-6.2154e-10	-1.1835e-10	3.776e-10	-5.3467e-10	-3.6859e-10	6.6551e-10	1.9302e-09	-1.0044e-09	-4.0761e-09	9.1963e-10	1.2408e-09	-7.4719e-10	-1.2798e-10	9.6517e-10	4.7719e-10	2.323e-09	3.9372e-10
JR2/Qianlijing	-0.83376	6.3523	3.0287	19.391	20.4	0.52635	-3.9916	16.993	12.316	-10.897	0.33717	12.827	-3.5566	3.1454	4.9132	-1.2258	1.1419	-1.7136e-09	-1.1131e-09	-7.9511e-10	-2.2479e-09	-1.1042e-11	-2.0248e-09	2.9636e-09	1.0669e-09	-2.3934e-10	2.1391e-09	-1.6548e-09	-5.7089e-10	-3.7997e-10	1e-09	5.1165e-10	2.7103e-09	8.7956e-10	-5.1332e-10	7.9119e-10	-8.6303e-10	-1.3873e-09	3.3205e-10	-2.6445e-09	8.1818e-10	-9.0311e-11	2.2613e-09	8.7619e-11	2.5339e-10	3.9418e-10	1.1372e-09	-3.6602e-10	-2.0787e-09
JR2/R4115	-16.904	-9.0053	-1.9935	17.218	25.053	9.4115	-3.7681	5.9517	-4.653	5.239	-11.432	6.2382	4.2409	9.7306	-5.718	2.3196	1.6748	-2.2982e-09	-1.4281e-09	1.1083e-09	-3.3465e-10	-1.1369e-09	-2.5063e-09	-1.2345e-09	-2.9623e-09	2.1651e-10	1.2226e-10	-8.6108e-11	-1.1441e-09	5.1002e-11	8.0231e-11	-1.477e-09	9.5733e-10	-6.9717e-10	-1.3508e-09	-1.3988e-09	1.3454e-09	3.9363e-10	1.8756e-09	1.1336e-10	-8.9717e-10	3.7705e-10	1.0095e-09	-6.8338e-10	9.6779e-10	-1.9524e-09	6.7572e-10	1.5107e-09	8.1251e-10
JR2/R465	2.9903	6.6355	-4.9925	18.333	12.191	-7.2149	-9.0079	19.014	-5.5884	4.0993	3.6943	10.133	9.7324	-5.5028	-9.3538	1.4992	-1.6591	-3.0013e-09	-1.4374e-09	-2.0383e-09	-1.2246e-09	-6.4432e-10	-1.827e-11	2.4946e-10	-2.4264e-09	-1.1623e-09	-1.5163e-09	3.5251e-11	2.2467e-09	-1.1859e-09	7.7225e-10	-2.4509e-10	-4.5109e-11	-2.2739e-09	-1.2346e-09	1.3537e-09	-7.4103e-10	-1.3143e-09	-1.5665e-10	3.0873e-10	-2.0286e-09	-8.1899e-10	1.3281e-09	-1.1338e-09	-1.8835e-09	-7.0509e-11	-1.2096e-09	-6.0418e-10	-3.3162e-09
JR2/WH1383	-12.715	4.5317	4.8877	11.968	29.941	-2.8599	-12.869	-2.7046	12.064	8.3489	5.952	1.53	-4.459	-5.6376	-9.461	1.2639	-0.72402	-2.7021e-09	-1.2615e-09	-1.0755e-09	6.4226e-10	3.9904e-09	-1.3323e-10	-1.5432e-09	7.0174e-10	1.1035e-09	4.1682e-10	-1.1995e-09	-6.9623e-10	-1.0998e-09	-1.202e-09	-1.1618e-09	-2.7092e-10	1.9957e-09	8.0325e-10	1.1912e-09	2.2814e-09	-1.1616e-09	5.9717e-10	-8.8097e-10	1.1319e-09	7.4175e-10	-1.0655e-11	1.5369e-09	-2.8573e-09	3.2362e-09	9.6372e-10	-5.9365e-11	2.9748e-09
JR2/WH1390	-25.482	14.2	-14.764	19.056	14.622	-2.4547	-10.719	-0.91854	3.659	-9.4892	-0.83128	3.7848	7.2627	4.3593	-3.1163	-0.81708	-11.577	-3.0798e-09	-1.4991e-09	-1.7395e-10	-1.5639e-10	1.4585e-09	-6.9674e-10	6.9414e-10	5.7915e-10	6.6586e-10	1.1729e-09	-1.9836e-09	9.3032e-10	1.7904e-09	4.9977e-10	-8.8498e-10	-1.7e-09	1.0507e-09	9.9376e-10	-3.99e-10	1.6394e-09	2.2747e-10	3.7919e-10	-1.0945e-09	-1.3864e-09	-7.633e-10	-6.6534e-10	2.3693e-10	2.4626e-09	-2.527e-09	-4.0295e-09	3.5685e-10	-2.404e-10
JR2/WH1392	-23.167	14.741	-12.323	14.803	15.978	-10.21	-6.1008	-1.5781	1.1387	-7.2174	3.8527	8.1183	4.9773	4.0696	-6.1005	1.4035	12.511	-2.8178e-09	1.4113e-08	-2.1028e-10	5.3421e-11	1.2165e-09	8.1848e-10	-2.1391e-09	-8.2634e-10	-5.6418e-10	-1.4776e-09	5.4836e-10	3.4665e-10	-1.2374e-09	-4.1752e-11	4.7054e-10	-1.2945e-09	9.1546e-10	7.5327e-10	-1.0294e-09	2.5189e-11	2.3731e-09	-1.069e-09	7.4346e-10	1.4657e-09	1.7731e-09	-1.0781e-09	1.2805e-09	-2.9455e-11	-1.5858e-09	-1.2318e-09	-1.5819e-09	1.2092e-09
JR2/WH1394	-27.189	15.465	-24.295	23.992	9.927	1.3454	6.7967	10.57	9.9453	11.45	0.60806	3.232	0.74064	-0.082112	-1.0807	0.49314	0.38215	-3.0509e-09	-1.4213e-09	3.1277e-10	3.1497e-09	-1.6149e-09	9.633e-10	-7.505e-11	5.9089e-10	-1.2094e-10	-1.1029e-09	3.1094e-10	1.5854e-09	2.3583e-09	3.4462e-10	-2.295e-10	-1.686e-10	-1.047e-09	4.7996e-10	-8.6531e-10	4.2176e-11	1.079e-09	-2.2196e-09	-2.2588e-09	1.989e-09	6.7507e-10	-1.5596e-09	-7.3185e-10	2.8451e-10	-2.4181e-10	1.3417e-09	-1.9271e-12	-4.7872e-10
JR2/YB	-0.8048	1.9945	-1.7164	27.126	12.977	-12.222	-13.568	3.5225	6.2007	8.5038	-3.912	-0.92473	8.0991	5.6986	3.1293	-8.9102	2.4332	-2.8742e-09	-1.3625e-09	-2.0657e-09	-2.5368e-09	-5.0448e-10	8.9467e-10	-9.2069e-10	-1.2525e-09	-9.8934e-10	4.7384e-10	2.3263e-09	-1.1066e-10	5.6702e-10	6.4378e-10	1.9802e-09	-1.3634e-09	-2.0381e-09	-1.5248e-10	-1.1693e-09	-5.2857e-10	-1.5483e-09	3.8843e-10	1.4062e-09	-1.4448e-09	-5.862e-11	-1.1109e-09	-1.7126e-09	1.424e-09	2.1725e-09	-3.9854e-10	-3.2186e-10	1.8253e-09
Liaoxing1/110080	-26.436	14.891	4.006	-11.576	-6.1615	-2.768	-12.533	6.5631	-10.152	-0.048568	-14.526	-5.1301	-11.539	-9.619	5.0815	-1.753	1.7111	-2.2597e-09	-1.9072e-09	1.1258e-09	-4.7085e-10	-6.7245e-10	-1.3287e-09	-4.6795e-10	1.8967e-10	4.1893e-10	3.3844e-09	-2.33e-09	-2.5622e-11	-5.3656e-10	9.0226e-10	7.2955e-11	-2.1378e-10	3.7306e-10	-3.9605e-09	8.7759e-11	4.4585e-10	5.4204e-10	-2.1244e-10	5.606e-10	9.7417e-10	1.8841e-10	1.5793e-09	-4.6222e-10	1.6806e-09	3.3826e-09	-1.0641e-10	2.2874e-09	-7.2293e-12
Liaoxing1/610234	4.5635	5.3687	0.27321	-3.9403	-4.9934	-15.345	-5.3246	-6.5831	-3.3405	5.2034	-14.253	5.3347	-9.0118	-4.5165	8.6499	14.984	-2.0496	1.8976e-08	-2.3045e-09	-1.2651e-09	1.0592e-09	4.4566e-10	9.5531e-10	1.2814e-09	-2.5812e-09	-6.5353e-11	9.0902e-11	5.0031e-11	-6.8901e-10	1.4524e-09	-1.2859e-09	8.8949e-10	-2.1792e-09	1.2329e-09	2.7386e-09	4.7243e-10	1.5365e-09	1.6286e-10	1.2047e-09	2.5921e-10	-1.9032e-09	-1.4933e-09	1.6608e-09	1.3067e-09	-1.6526e-09	-9.8338e-10	-5.0874e-10	2.2742e-09	-4.8797e-10
Liaoxing1/9311K	4.843	10.084	-7.026	-7.8135	-14.705	-0.37013	-11.269	-8.0119	-3.802	6.6965	-11.275	16.156	-14.166	-1.9709	-1.3453	-4.9077	-0.90399	-2.8884e-09	-1.8544e-09	-1.6824e-09	-1.7098e-09	-1.38e-09	-2.833e-13	7.3456e-10	4.3237e-10	-1.8924e-09	-1.6869e-09	-1.5436e-10	-5.9729e-10	-6.709e-10	7.3345e-10	-2.1315e-10	-6.9044e-10	-8.3215e-10	2.2259e-09	5.4881e-10	1.4593e-09	7.3927e-10	-5.5476e-10	-1.0139e-10	1.5562e-09	-1.1921e-09	1.2334e-09	-6.9046e-10	-1.8729e-09	-2.6692e-09	1.196e-09	-4.3216e-10	1.7198e-09
Liaoxing1/Balilla	2.7881	7.7782	8.3744	0.70719	-11.178	-6.1132	4.2058	-4.8326	4.6492	-4.7378	-25.909	1.5168	-5.1704	-11.335	-6.2321	-0.45316	0.79525	1.9659e-08	-2.3503e-09	-2.0711e-10	1.1701e-09	-1.6231e-10	4.2137e-10	3.3761e-10	-1.1227e-09	-2.2996e-09	2.7128e-09	2.3732e-09	1.3462e-09	-1.6783e-09	3.2253e-10	-5.2659e-10	1.3131e-09	6.6882e-10	9.0122e-10	5.008e-10	7.8489e-11	-7.836e-10	-4.2272e-10	3.3508e-10	1.2031e-10	-3.6324e-10	-3.9604e-10	3.1382e-09	-6.0786e-10	7.8617e-10	-7.5232e-10	-7.1032e-10	-3.9613e-10
Liaoxing1/C418	-23.478	-33.03	-6.7163	-10.667	-7.993	-15.72	-1.9003	-0.78324	-0.7834	-0.07233	-11.626	7.7486	-9.0752	-8.3981	1.4362	-2.1423	-1.5674	-2.9026e-09	-1.8692e-09	1.1375e-09	6.9752e-10	1.0324e-09	-5.3961e-10	-5.8586e-10	1.8562e-09	2.4911e-10	-1.2561e-09	1.3877e-09	-7.3264e-10	-3.4129e-10	-6.4435e-10	1.69e-09	-8.4612e-10	-7.6526e-10	7.2337e-11	4.5349e-10	-2.3547e-09	9.5659e-11	4.2945e-10	8.0167e-10	-2.6407e-09	3.1025e-10	9.2385e-10	-1.0462e-09	3.6516e-09	-7.9049e-10	-1.6108e-09	2.541e-10	5.0506e-10
Liaoxing1/JR2	-26.648	11.602	-3.0056	14.962	12.157	-13.06	-9.2972	2.2395	-0.70269	4.2507	-15.738	14.12	-5.6644	-6.1257	-0.70635	-1.1285	-0.5606	-3.1167e-09	-1.5032e-09	1.735e-09	2.3915e-09	5.566e-10	1.146e-09	-4.3782e-10	-8.642e-11	3.9273e-09	-1.7408e-11	-1.1257e-09	3.105e-10	1.6432e-09	-1.8722e-09	6.5641e-12	2.2259e-09	-9.1433e-10	-1.1208e-09	7.7447e-10	-9.5988e-10	-2.9863e-10	-4.1896e-10	4.3204e-11	1.6137e-09	-1.399e-09	6.4729e-10	8.9323e-10	1.7029e-09	-1.7944e-09	8.7637e-10	2.776e-10	4.7985e-10
Liaoxing1/Mianhui725	1.3544	4.2441	1.6889	5.0043	3.3902	-11.7	9.5551	-9.9984	-17.055	-0.12055	-8.9946	3.8962	-15.203	-9.6373	3.6042	-5.1066	-2.6698	-2.9874e-09	-1.9064e-09	-7.4133e-10	2.6735e-09	8.1289e-10	-5.3831e-11	5.7609e-10	2.4955e-10	-2.3396e-09	6.0807e-10	-8.7374e-10	-1.9364e-10	6.2441e-10	1.5494e-09	3.6165e-09	2.651e-10	3.9693e-10	9.842e-10	-1.0721e-09	1.5054e-09	-1.8e-09	-1.1479e-09	1.7514e-09	-1.8255e-09	-1.2036e-09	-1.4033e-09	-1.396e-09	-5.1665e-10	-2.1282e-09	1.3283e-09	1.3711e-10	1.0371e-09
Liaoxing1/Qianlijing	4.9044	9.1705	11.046	-11.636	2.6063	-10.658	3.5123	10.693	5.3489	-9.0908	-12.709	12.616	-15.757	-1.1062	7.8364	-2.235	-1.58	-1.7121e-09	-1.5475e-09	-2.1208e-09	-1.2663e-09	-1.9455e-09	-2.6295e-09	-1.3402e-09	-4.6956e-10	2.0828e-09	-1.2237e-09	1.3045e-09	-8.1299e-10	-3.9056e-10	-8.2631e-10	-2.0894e-09	-1.2823e-09	1.0536e-09	1.6035e-09	1.7121e-09	-8.9177e-10	-2.4153e-10	-1.2836e-11	8.843e-10	4.2031e-10	1.127e-09	-6.0664e-10	-2.1736e-09	5.3311e-10	-6.3204e-10	-6.9179e-10	-3.4067e-10	8.273e-10
Liaoxing1/R4115	-11.166	-6.1871	6.0241	-13.808	7.2588	-1.7726	3.7358	-0.34808	-11.62	7.0455	-24.478	6.027	-7.9593	5.479	-2.7948	1.3104	-1.0472	-2.258e-09	-1.9111e-09	6.0283e-10	-1.0706e-09	3.5015e-09	-1.3652e-09	-8.9825e-11	-1.1013e-10	-1.3181e-09	-1.2272e-09	1.2714e-09	9.1622e-10	5.6942e-10	-2.8636e-09	1.9161e-09	-3.8338e-10	-9.4662e-10	1.0698e-09	-4.3179e-10	-1.5241e-09	-3.4494e-10	5.1396e-10	-6.1418e-10	9.1328e-10	-1.9772e-10	1.3858e-09	-3.468e-11	1.1429e-09	1.0573e-09	-3.3301e-10	-1.5856e-09	-1.0069e-09
Liaoxing1/R465	8.7284	9.4537	3.0251	-12.694	-5.6026	-18.399	-1.504	12.714	-12.555	5.9058	-9.3515	9.9221	-2.4678	-9.7545	-6.4307	0.49008	-4.3811	-2.9661e-09	-1.9268e-09	-1.4417e-09	5.565e-10	-2.0769e-09	-2.6907e-09	1.1683e-09	5.9179e-10	3.04e-09	2.1388e-10	-1.3889e-09	-1.5384e-09	-7.6392e-10	2.0859e-09	-8.8753e-10	9.721e-10	-4.5414e-10	2.6252e-09	7.7534e-10	8.7142e-10	2.0003e-09	1.042e-09	-6.1375e-10	2.5098e-09	4.4715e-10	-2.558e-10	5.709e-10	-1.0833e-09	1.0458e-09	-1.1058e-09	-2.9488e-10	1.1843e-09
Liaoxing1/WH1384	-11.962	10.9	4.0347	-19.556	3.7171	-4.5461	2.4039	-8.2197	-2.5637	5.6967	-14.066	13.315	3.3634	-12.35	8.9589	-3.7277	-0.76296	-2.9866e-09	-1.9285e-09	1.9167e-10	9.4193e-10	1.0379e-09	1.7222e-09	1.0759e-09	-1.4597e-09	-3.672e-10	2.0495e-09	-1.424e-10	8.7722e-10	1.4888e-10	-3.2676e-11	-5.4223e-10	1.0899e-09	1.6139e-10	-2.5858e-09	-1.6873e-09	2.1233e-11	7.624e-10	8.8065e-11	-1.808e-09	1.1005e-09	2.1385e-10	-1.6376e-09	1.1335e-09	-2.7319e-10	3.5505e-10	7.8601e-10	-7.2141e-10	6.0458e-10
Liaoxing1/WH1390	-19.744	17.018	-6.746	-11.971	-3.1716	-13.639	-3.2153	-7.2183	-3.3078	-7.6827	-13.877	3.5736	-4.9374	0.10761	-0.19315	-1.8262	-14.299	-3.0561e-09	-1.9688e-09	1.6247e-09	-9.1286e-10	1.329e-09	5.3458e-10	-6.5484e-13	1.3098e-10	-2.581e-09	2.353e-09	1.598e-09	1.7716e-10	1.0556e-09	1.2417e-09	-1.8963e-09	-6.2298e-10	-1.3364e-09	-3.9538e-10	-9.109e-10	1.6224e-09	-1.4973e-10	-1.1402e-09	-1.2069e-09	8.5496e-11	2.7698e-09	-5.2914e-11	4.811e-10	-4.355e-10	-2.4575e-10	5.3029e-10	-1.1564e-09	-2.5184e-09
Liaoxing1/WH1392	-17.429	17.56	-4.3058	-16.224	-1.816	-21.394	1.4031	-7.8779	-5.8281	-5.4109	-9.1931	7.907	-7.2229	-0.18206	-3.1774	0.39434	9.7896	-2.8146e-09	1.363e-08	-4.5771e-10	-2.8542e-09	1.9584e-09	4.4191e-10	2.0652e-10	-7.853e-11	-6.5909e-10	-9.7344e-10	1.9757e-09	-1.1115e-09	-2.088e-11	-1.503e-10	7.3014e-10	-5.3737e-10	6.3717e-10	-4.8173e-09	1.9461e-10	3.9832e-10	1.1702e-09	1.0028e-10	-1.7109e-09	-8.8433e-10	6.0893e-10	-3.1807e-09	-5.5575e-10	-2.0217e-09	-6.8361e-10	-1.7204e-09	-8.1717e-10	-3.6755e-10
Liaoxing1/WH1394	-21.451	18.283	-16.278	-7.0353	-7.8669	-9.8387	14.301	4.2704	2.9785	13.257	-12.438	3.0208	-11.46	-4.3338	1.8425	-0.51603	-2.3398	-2.9921e-09	-1.9158e-09	9.438e-10	5.0936e-10	1.0357e-10	1.2088e-09	-1.245e-09	1.4766e-09	-7.5794e-10	-9.6703e-10	-2.4444e-10	-4.4339e-10	1.63e-09	1.2764e-09	-1.3319e-09	2.9279e-09	2.2092e-10	1.0807e-09	1.2821e-09	1.6275e-10	-1.3016e-09	-1.1157e-10	-1.7382e-10	2.6192e-10	1.9221e-09	1.0439e-09	3.6944e-10	1.8355e-09	3.5652e-09	-9.3327e-11	6.8038e-10	-6.0843e-10
Liaoxing1/Wuyunjing8	-32.755	8.4116	29.009	-0.6242	-14.916	-11.699	3.1287	-3.6155	-4.4882	5.9842	-7.6225	10.64	-7.4343	-1.6017	0.65074	0.20308	-2.9121	-2.795e-09	1.3128e-08	3.654e-10	-1.9387e-09	-2.2957e-09	1.5422e-09	-1.2157e-09	1.9202e-09	1.9088e-09	-6.0846e-10	-3.5423e-09	1.0053e-09	-7.6915e-10	-1.3969e-09	-1.0601e-09	-1.1538e-09	8.6157e-10	2.1293e-10	-1.6641e-09	-1.9436e-09	2.0181e-10	-1.2456e-09	1.8221e-09	-1.0454e-09	-1.4299e-10	-5.2039e-10	-1.8351e-09	-7.0782e-10	7.1828e-10	4.2402e-10	-1.0335e-09	3.9126e-10
Liaoxing1/YB	4.9333	4.8127	6.3012	-3.901	-4.817	-23.407	-6.0641	-2.7773	-0.76611	10.31	-16.958	-1.136	-4.1011	1.4469	6.0525	-9.9194	-0.28873	-2.8975e-09	-1.8638e-09	1.8945e-10	2.2377e-10	-2.2451e-09	6.3551e-10	2.5308e-12	-9.3919e-10	6.533e-10	-3.4522e-09	-1.5863e-10	1.5119e-09	-1.9522e-09	9.6056e-10	-3.7457e-10	-8.8463e-10	-3.5746e-10	-6.345e-10	-1.0357e-09	-4.2761e-10	-7.5442e-10	1.8885e-09	-2.2857e-10	-1.2566e-09	-1.5956e-09	-4.2091e-10	3.01e-10	-1.375e-09	-9.8346e-10	1.7815e-09	1.1814e-09	-1.3566e-09
Mianhui725/110080	-4.1721	4.7141	0.68297	9.4933	2.866	9.7762	-1.185	0.62499	-19.537	-6.2263	5.2631	-15.142	-8.877	-8.879	6.4689	-4.7218	2.3239	-2.1842e-09	-1.8977e-09	-3.08e-10	1.4843e-09	1.1187e-09	-3.322e-09	-1.2483e-09	-9.8746e-10	1.1574e-09	7.8351e-10	-1.2673e-09	-1.4424e-09	2.1615e-10	-9.9148e-10	3.1247e-09	1.0265e-09	7.6489e-10	1.2493e-11	-2.5878e-09	-4.9887e-10	-4.8128e-10	4.3952e-10	-1.3281e-09	1.3195e-09	-1.2316e-09	-5.8409e-10	2.206e-09	1.1892e-10	1.7521e-10	-6.4477e-10	-2.1308e-10	-2.4759e-09
Mianhui725/610234	26.827	-4.8077	-3.0498	17.129	4.0341	-2.8007	6.0238	-12.521	-12.726	-0.97439	5.5355	-4.6775	-6.3501	-3.7765	10.037	12.015	-1.4369	1.9074e-08	-2.2159e-09	1.4309e-09	-1.6739e-09	8.9213e-10	9.7061e-10	1.0882e-09	3.7249e-09	-1.0916e-09	-7.4464e-10	2.5732e-10	4.2001e-10	-8.7612e-10	2.5924e-09	-4.7966e-10	-4.4757e-11	5.8361e-10	-1.493e-09	8.1741e-10	6.7201e-10	1.5974e-09	-1.42e-09	1.0385e-09	9.1762e-10	-3.1458e-10	3.4323e-10	-1.1886e-09	2.2306e-09	-6.4145e-10	2.2451e-10	-1.1488e-09	1.2128e-09
Mianhui725/9311K	27.107	-0.092848	-10.349	13.256	-5.6776	12.174	0.078968	-13.95	-13.187	0.51868	8.5139	6.1436	-11.505	-1.2309	0.042074	-7.8766	-0.29123	-2.8047e-09	-1.8031e-09	1.3646e-09	1.3597e-09	1.4757e-10	1.1244e-09	-9.9631e-10	5.8603e-11	9.8873e-10	2.7557e-09	-5.4619e-10	1.1151e-09	1.7636e-09	-2.1856e-09	-1.6424e-09	-5.0699e-10	2.2509e-10	-5.8813e-10	5.8554e-10	-1.4123e-09	2.147e-09	3.4046e-09	2.158e-09	1.9183e-09	7.0672e-10	-1.208e-10	7.1303e-10	-6.2347e-11	7.5667e-10	-1.0348e-10	-3.637e-09	2.8617e-10
Mianhui725/Balilla	25.052	-2.3983	5.0514	21.777	-2.1504	6.431	15.554	-10.771	-4.7362	-10.916	-6.1199	-8.4954	-2.5086	-10.595	-4.8446	-3.422	1.408	1.9745e-08	-2.3448e-09	6.3623e-10	-3.0824e-09	8.6668e-10	1.8006e-09	-2.084e-09	1.6136e-09	5.9795e-10	-2.0492e-09	-2.1526e-09	-6.7949e-10	6.4068e-10	-2.5611e-10	-8.5213e-10	1.5568e-09	8.007e-10	1.162e-09	1.1716e-09	2.0112e-09	2.5072e-09	-7.7782e-10	-2.3749e-09	-2.267e-09	-1.2403e-10	1.9893e-10	-1.6361e-09	-1.0989e-09	1.4811e-09	-1.4173e-09	1.8252e-09	-2.0092e-10
Mianhui725/C418	-1.2141	-43.206	-10.039	10.403	1.0345	-3.1761	9.448	-6.7214	-10.169	-6.2501	8.1633	-2.2637	-6.4135	-7.6581	2.8236	-5.1112	-0.95464	-2.8274e-09	-1.7935e-09	-1.1017e-09	-2.6401e-10	2.0655e-09	4.6669e-10	-1.217e-09	-1.8222e-09	4.3552e-09	-1.2218e-10	3.4826e-10	-1.1206e-09	-1.4108e-09	1.3353e-09	-1.2287e-09	-2.8491e-10	-2.5369e-09	-1.2235e-09	-2.3909e-09	3.0391e-09	3.7938e-10	-2.7665e-09	-7.8489e-10	-5.0471e-10	-1.414e-09	9.6259e-10	1.1636e-10	-3.548e-09	-1.0964e-09	6.9447e-10	-8.748e-10	-1.2573e-09
Mianhui725/JR2	-4.3837	1.4259	-6.3286	36.031	21.184	-0.51596	2.0512	-3.6986	-10.088	-1.9271	4.0513	4.1074	-3.0027	-5.3857	0.68106	-4.0974	0.052155	-3.0077e-09	-1.4258e-09	8.5556e-10	-4.6198e-10	3.4307e-10	-2.6538e-09	2.9816e-09	-7.7164e-10	-4.6509e-10	-1.0758e-09	9.2938e-10	-5.8962e-10	6.8837e-10	-2.9092e-10	-1.3227e-09	-6.2154e-10	-1.1835e-10	3.776e-10	-5.3467e-10	-3.6859e-10	6.6551e-10	1.9302e-09	-1.0044e-09	-4.0761e-09	9.1963e-10	1.2408e-09	-7.4719e-10	-1.2798e-10	9.6517e-10	4.7719e-10	2.323e-09	3.9372e-10
Mianhui725/Liaoxing1	1.3544	4.2441	1.6889	5.0043	3.3902	-11.7	9.5551	-9.9984	-17.055	-0.12055	-8.9946	3.8962	-15.203	-9.6373	3.6042	-5.1066	-2.6698	-2.9874e-09	-1.9064e-09	-7.4133e-10	2.6735e-09	8.1289e-10	-5.3831e-11	5.7609e-10	2.4955e-10	-2.3396e-09	6.0807e-10	-8.7374e-10	-1.9364e-10	6.2441e-10	1.5494e-09	3.6165e-09	2.651e-10	3.9693e-10	9.842e-10	-1.0721e-09	1.5054e-09	-1.8e-09	-1.1479e-09	1.7514e-09	-1.8255e-09	-1.2036e-09	-1.4033e-09	-1.396e-09	-5.1665e-10	-2.1282e-09	1.3283e-09	1.3711e-10	1.0371e-09
Mianhui725/Qianlijing	27.168	-1.006	7.7233	9.4336	11.634	1.8864	14.861	4.7547	-4.0365	-15.269	7.0802	2.6036	-13.095	-0.36623	9.2238	-5.2039	-0.96727	-1.6034e-09	-1.5367e-09	1.5742e-09	-1.9803e-10	-2.6602e-09	3.2626e-09	2.2367e-09	-1.2636e-09	8.9103e-10	2.838e-09	1.9138e-09	-1.2023e-09	-1.7141e-09	1.031e-09	-1.4213e-09	1.9739e-10	1.5452e-09	-7.4755e-11	-7.7043e-10	-5.1488e-10	1.1497e-09	1.9839e-09	7.9575e-10	8.6017e-10	1.2875e-09	-6.4792e-10	-1.3367e-10	-4.1304e-10	-1.4738e-11	-1.7632e-09	1.3863e-09	-1.4633e-09
Mianhui725/R4115	11.098	-16.364	2.7011	7.2612	16.286	10.772	15.084	-6.2862	-21.005	0.86775	-4.689	-3.9853	-5.2975	6.219	-1.4074	-1.6584	-0.43442	-2.1839e-09	-1.868e-09	3.3418e-10	1.056e-09	-1.0303e-09	-4.1013e-10	1.1498e-10	6.1128e-10	-7.1048e-10	-9.3832e-10	-4.8244e-10	2.2936e-10	-2.7455e-10	-1.3781e-09	-1.9124e-09	-5.597e-10	8.9142e-10	-2.4253e-09	1.0069e-09	-7.4869e-11	-3.4262e-10	-6.661e-10	-1.5414e-09	-2.5312e-10	7.3827e-10	2.2087e-09	2.0782e-09	9.9981e-10	-1.2158e-09	5.5978e-11	-3.9481e-10	-3.8468e-10
Mianhui725/R465	30.992	-0.72274	-0.2979	8.3758	3.4249	-5.8549	9.8444	6.7758	-21.941	-0.27197	10.437	-0.090133	0.19391	-9.0145	-5.0432	-2.4788	-3.7683	-2.9374e-09	-1.853e-09	2.8864e-09	-2.1433e-09	-4.2897e-10	1.6531e-09	2.6998e-09	-2.6036e-09	-1.1805e-09	1.7612e-09	-5.9736e-10	-6.145e-10	3.5037e-10	-2.3315e-10	-2.0798e-09	2.1267e-10	-1.2779e-09	6.6082e-10	-6.4271e-10	-2.7507e-09	2.7591e-11	-4.0081e-10	-3.1399e-10	-6.9244e-10	-8.6454e-10	3.4514e-10	-2.024e-09	-1.5924e-09	-2.9313e-11	4.8246e-10	-7.9752e-10	1.934e-09
Mianhui725/WH1384	10.301	0.7233	0.71172	1.5135	12.745	7.998	13.752	-14.158	-11.949	-0.48106	5.723	3.3032	6.0251	-11.61	10.346	-6.6965	-0.15021	-2.9038e-09	-1.8737e-09	-1.3363e-09	1.135e-09	-1.8948e-09	-3.9586e-10	-1.2709e-09	-2.3539e-10	-1.6486e-09	9.9876e-10	1.8924e-09	-3.338e-11	7.2786e-10	6.1606e-11	9.4102e-10	7.7117e-10	-1.9037e-09	-3.1458e-10	1.2822e-09	1.5815e-09	-4.2507e-09	2.5917e-09	1.0416e-09	2.3401e-09	-7.1526e-10	-5.5757e-10	-1.5883e-09	5.3136e-11	1.1975e-09	4.5081e-10	2.0986e-09	9.1408e-10
Mianhui725/WH1390	2.5198	6.8415	-10.069	9.0985	5.856	-1.0946	8.1331	-13.156	-12.693	-13.86	5.9118	-6.4387	-2.2757	0.84759	1.1943	-4.7951	-13.687	-2.9346e-09	-1.9107e-09	-3.8865e-10	2.491e-10	-1.3346e-09	-1.4723e-09	-2.2186e-09	1.4841e-09	1.7638e-09	-2.2829e-09	-1.0461e-09	5.3706e-10	-2.7286e-09	-7.7103e-10	5.4009e-10	-1.428e-09	3.8576e-10	4.2499e-10	1.9964e-10	-1.51e-09	-2.2267e-09	-1.0519e-09	-1.3891e-10	1.87e-09	1.3105e-09	-1.3641e-10	-1.2079e-09	1.392e-09	6.3191e-10	-5.281e-10	-1.117e-10	-2.1367e-09
Mianhui725/WH1392	4.8353	7.3832	-7.6288	4.846	7.2115	-8.8497	12.752	-13.816	-15.214	-11.589	10.596	-2.1052	-4.5612	0.55792	-1.79	-2.5745	10.402	-2.7519e-09	1.3691e-08	-2.4854e-09	3.6216e-09	-4.7493e-10	1.4598e-09	-1.6471e-10	-1.7242e-09	-1.1054e-10	-8.0005e-13	1.0646e-10	1.1551e-09	1.3546e-09	2.0838e-09	1.0137e-09	-8.1837e-10	6.8049e-10	1.1304e-10	-3.8357e-10	-8.297e-10	-1.0189e-09	-1.7199e-09	1.8552e-10	-1.9251e-09	-8.9341e-10	1.3721e-09	-1.4713e-10	8.854e-10	1.3604e-09	8.3901e-10	9.3082e-10	-7.5796e-11
Mianhui725/WH1394	0.81296	8.1069	-19.601	14.034	1.1606	2.7055	25.649	-1.6678	-6.4069	7.079	7.3511	-6.9915	-8.7978	-3.5938	3.2299	-3.4849	-1.727	-2.8933e-09	-1.8596e-09	-2.3196e-10	-1.6633e-09	-1.2695e-09	-1.9728e-09	9.7066e-10	2.3889e-09	-1.2827e-09	4.2811e-10	-1.828e-09	1.1653e-09	-9.5553e-10	-2.4921e-09	1.4186e-10	-2.4862e-09	-1.812e-09	1.1401e-10	-1.8606e-09	-4.2542e-10	4.8344e-10	2.9789e-11	-1.3815e-10	-7.0992e-10	-7.8801e-11	-3.7934e-09	2.2454e-09	-7.1473e-10	-8.4133e-10	1.8615e-09	-1.6661e-09	-3.9654e-10
Mianhui725/Wuyunjing8	-10.491	-1.7648	25.686	20.445	-5.8881	0.84508	14.477	-9.5536	-13.874	-0.19355	12.166	0.62788	-4.7726	-0.86174	2.0382	-2.7658	-2.2993	-2.6943e-09	1.3245e-08	-3.7095e-09	9.2234e-10	2.287e-09	-2.345e-09	-5.9538e-10	-1.0157e-09	-8.5208e-10	-9.2663e-10	-1.9396e-10	-1.2685e-09	-1.5168e-10	-2.4377e-10	2.4444e-09	1.4632e-09	9.3528e-10	1.9372e-10	2.2053e-09	-3.9133e-11	-2.1258e-10	-1.2225e-09	2.3346e-10	1.5391e-09	1.6478e-09	-3.4594e-10	-1.3291e-09	1.5788e-09	-1.9074e-09	-1.1807e-09	-1.0292e-09	1.7858e-09
Mianhui725/YB	27.197	-5.3638	2.9782	17.169	4.2105	-10.862	5.2843	-8.7154	-10.151	4.1326	2.8311	-11.148	-1.4394	2.1869	7.4399	-12.888	0.32402	-2.8121e-09	-1.8294e-09	1.1041e-09	-3.1328e-09	3.1032e-10	1.8517e-09	-1.0769e-09	3.6587e-10	2.3506e-10	-2.3812e-09	3.4082e-09	2.3746e-09	1.5247e-09	1.4254e-10	-1.5451e-09	1.4281e-09	1.0511e-09	2.1336e-09	2.7477e-09	-2.8582e-10	1.5939e-09	7.6287e-10	-1.2903e-10	1.231e-09	1.878e-10	5.2655e-10	3.929e-09	3.0807e-10	1.1309e-09	-1.0718e-09	1.1917e-09	5.9307e-10
Qianlijing/110080	-0.62214	9.6405	10.04	-7.147	2.082	10.819	-7.2278	21.316	2.8664	-15.197	1.549	-6.4228	-9.4308	-0.34788	10.701	-1.8503	3.4136	-8.9926e-10	-1.5545e-09	-7.2445e-10	9.4204e-10	3.5621e-10	-1.3839e-09	-1.474e-10	-3.6565e-10	-2.2069e-09	-1.5122e-09	3.3192e-11	1.5135e-09	2.1404e-09	-1.4896e-09	-2.0092e-09	-1.4953e-09	-2.1306e-09	8.2237e-10	1.1668e-09	6.3201e-10	8.8729e-10	3.9439e-10	-2.6683e-09	3.0083e-10	-1.1654e-09	1.6065e-09	1.2577e-10	-1.5699e-10	-2.6352e-10	9.6725e-10	-1.3325e-09	3.3782e-09
Qianlijing/610234	30.377	0.11865	6.3076	0.48897	3.2502	-1.7583	-0.019045	8.17	9.6778	-9.9446	1.8214	4.0421	-6.904	4.7546	14.269	14.887	-0.34711	2.0289e-08	-1.917e-09	4.786e-10	5.0302e-10	-2.0911e-10	3.6392e-10	-1.2951e-10	8.5363e-11	-1.0234e-09	-1.0838e-10	3.3982e-10	-7.9477e-11	-7.5486e-10	3.3847e-10	-3.9665e-10	9.9777e-10	-4.2182e-10	-4.8493e-10	-1.5634e-10	1.2103e-09	-7.8599e-11	-2.4254e-10	-1.5751e-10	-6.7158e-10	6.7613e-10	-6.9538e-10	-2.5678e-10	1.9673e-10	-3.8917e-11	3.8068e-10	-5.4167e-10	-9.4808e-10
Qianlijing/9311K	30.657	4.8335	-0.9916	-3.3843	-6.4616	13.216	-5.9638	6.7413	9.2164	-8.4515	4.7998	14.863	-12.058	7.3002	4.2742	-5.005	0.79851	-1.5649e-09	-1.46e-09	3.6112e-09	2.3555e-09	4.4062e-10	1.4224e-09	2.132e-11	-1.137e-09	8.6916e-10	-3.0756e-09	1.1562e-09	-4.0931e-10	-8.9871e-10	1.2557e-09	9.9005e-10	-8.2465e-10	-3.8181e-10	-1.1854e-09	-1.0263e-09	2.3132e-10	-2.0989e-09	1.0969e-09	3.0569e-09	1.3159e-09	-6.384e-10	-9.4053e-10	9.4519e-10	1.7672e-09	2.3166e-10	8.0978e-10	-2.9123e-10	-1.0611e-09
Qianlijing/Balilla	28.602	2.5281	14.409	5.1364	-2.9343	7.4733	9.5114	9.9205	17.668	-19.886	-9.834	0.22421	-3.0625	-2.0643	-0.61246	-0.55048	2.4977	2.1033e-08	-2.0337e-09	-1.7741e-10	-3.9294e-10	1.0535e-10	6.2714e-10	1.7639e-10	1.2902e-10	1.8196e-12	1.0992e-10	-1.6052e-11	3.8133e-10	7.9782e-10	-4.9783e-10	-6.5736e-10	-4.3157e-10	-1.3111e-10	1.9437e-10	-3.3289e-10	-3.5793e-10	9.4317e-10	2.9887e-11	8.1455e-10	2.6213e-10	-8.4191e-10	-8.7481e-10	-1.2654e-09	2.3926e-10	-9.1758e-11	2.9402e-10	6.6667e-10	-2.7511e-10
Qianlijing/C418	2.3359	-38.28	-0.68195	-6.2378	0.25058	-2.1337	3.4053	13.97	12.235	-15.22	4.4492	6.4559	-6.9674	0.87303	7.0558	-2.2397	0.1351	-1.5308e-09	-1.4874e-09	-1.0138e-09	-5.5813e-10	1.7539e-09	-1.4312e-09	2.1453e-10	2.2089e-09	-3.1303e-09	1.2694e-09	-1.1161e-09	1.8834e-10	1.8831e-09	6.7465e-10	-1.4961e-09	-1.6957e-09	1.8815e-11	-2.9043e-09	4.3863e-10	-1.134e-09	7.7473e-11	3.3738e-10	1.146e-09	6.9375e-10	3.9232e-10	6.7697e-10	-8.9544e-11	-7.9415e-10	-1.8987e-09	-1.9865e-09	-8.7999e-10	-1.3796e-09
Qianlijing/JR2	-0.83376	6.3523	3.0287	19.391	20.4	0.52635	-3.9916	16.993	12.316	-10.897	0.33717	12.827	-3.5566	3.1454	4.9132	-1.2258	1.1419	-1.7136e-09	-1.1131e-09	-7.9511e-10	-2.2479e-09	-1.1042e-11	-2.0248e-09	2.9636e-09	1.0669e-09	-2.3934e-10	2.1391e-09	-1.6548e-09	-5.7089e-10	-3.7997e-10	1e-09	5.1165e-10	2.7103e-09	8.7956e-10	-5.1332e-10	7.9119e-10	-8.6303e-10	-1.3873e-09	3.3205e-10	-2.6445e-09	8.1818e-10	-9.0311e-11	2.2613e-09	8.7619e-11	2.5339e-10	3.9418e-10	1.1372e-09	-3.6602e-10	-2.0787e-09
Qianlijing/Liaoxing1	4.9044	9.1705	11.046	-11.636	2.6063	-10.658	3.5123	10.693	5.3489	-9.0908	-12.709	12.616	-15.757	-1.1062	7.8364	-2.235	-1.58	-1.7121e-09	-1.5475e-09	-2.1208e-09	-1.2663e-09	-1.9455e-09	-2.6295e-09	-1.3402e-09	-4.6956e-10	2.0828e-09	-1.2237e-09	1.3045e-09	-8.1299e-10	-3.9056e-10	-8.2631e-10	-2.0894e-09	-1.2823e-09	1.0536e-09	1.6035e-09	1.7121e-09	-8.9177e-10	-2.4153e-10	-1.2836e-11	8.843e-10	4.2031e-10	1.127e-09	-6.0664e-10	-2.1736e-09	5.3311e-10	-6.3204e-10	-6.9179e-10	-3.4067e-10	8.273e-10
Qianlijing/Mianhui725	27.168	-1.006	7.7233	9.4336	11.634	1.8864	14.861	4.7547	-4.0365	-15.269	7.0802	2.6036	-13.095	-0.36623	9.2238	-5.2039	-0.96727	-1.6034e-09	-1.5367e-09	1.5742e-09	-1.9803e-10	-2.6602e-09	3.2626e-09	2.2367e-09	-1.2636e-09	8.9103e-10	2.838e-09	1.9138e-09	-1.2023e-09	-1.7141e-09	1.031e-09	-1.4213e-09	1.9739e-10	1.5452e-09	-7.4755e-11	-7.7043e-10	-5.1488e-10	1.1497e-09	1.9839e-09	7.9575e-10	8.6017e-10	1.2875e-09	-6.4792e-10	-1.3367e-10	-4.1304e-10	-1.4738e-11	-1.7632e-09	1.3863e-09	-1.4633e-09
Qianlijing/R4115	14.648	-11.437	12.058	-9.3792	15.502	11.814	9.0414	14.405	1.3986	-8.1025	-8.4031	4.7343	-5.8514	14.75	2.8248	1.2131	0.65533	-8.6288e-10	-1.5753e-09	2.3284e-10	-7.9941e-10	1.5258e-09	-6.7602e-11	2.6446e-10	-1.6839e-10	2.3763e-09	2.3166e-09	1.5491e-09	-5.7075e-10	-1.1142e-09	1.3814e-09	2.4267e-09	-9.8926e-10	-2.5607e-09	4.8897e-11	3.215e-10	-2.8989e-09	1.6233e-09	-3.0299e-09	5.9576e-10	-3.1416e-10	3.5118e-10	-1.121e-09	2.0479e-09	-6.2847e-10	3.5309e-10	-5.7319e-10	1.6845e-09	1.4625e-10
Qianlijing/R465	34.542	4.2037	9.0594	-8.2646	2.641	-4.8125	3.8016	27.467	0.46319	-9.2422	6.7233	8.6295	-0.35998	-0.48338	-0.81107	0.39277	-2.6786	-1.6298e-09	-1.551e-09	1.22e-09	6.2811e-10	5.6454e-10	2.4909e-09	-1.1184e-09	2.0243e-09	6.2065e-10	-4.2536e-10	-3.2912e-09	7.8331e-11	-1.26e-09	6.8109e-10	1.9244e-09	6.4238e-10	-1.2018e-09	-9.9362e-10	2.8178e-09	-2.2713e-10	-1.204e-09	1.398e-09	-3.1266e-09	-2.3962e-09	-6.1705e-10	-2.357e-09	-1.9747e-10	5.6419e-10	3.4071e-10	1.1582e-09	1.4613e-09	9.5201e-11
Qianlijing/WH1383	18.837	2.0998	18.94	-14.63	20.391	-0.4575	-0.059656	5.7488	18.115	-4.9926	8.9809	0.026093	-14.551	-0.61815	-0.91819	0.15738	-1.7434	-1.362e-09	-1.3281e-09	-1.3667e-09	2.2555e-09	-3.9536e-10	-1.8192e-09	-1.4459e-09	1.0868e-10	-9.5223e-10	-9.6982e-10	6.4165e-10	1.7407e-09	1.7521e-09	-9.773e-10	-5.3613e-10	3.011e-10	-1.2304e-09	6.6487e-10	-1.6305e-09	8.145e-10	2.7579e-09	-1.0297e-10	-5.3754e-10	1.0613e-09	1.5126e-09	-1.0542e-09	-1.1948e-09	-1.0434e-09	-1.7803e-09	5.1059e-10	8.2706e-10	-4.9052e-11
Qianlijing/WH1384	13.851	5.6497	10.069	-15.127	11.961	9.0403	7.7095	6.5335	10.455	-9.4513	2.0089	12.023	5.4712	-3.0785	14.578	-3.825	0.93953	-1.6269e-09	-1.5308e-09	3.1287e-10	5.4038e-10	-3.6196e-10	-2.5879e-11	-9.5301e-10	-4.611e-10	5.4928e-11	-2.021e-09	-2.9148e-10	-1.1996e-09	2.9985e-10	-5.4619e-10	2.8994e-09	1.7518e-10	3.215e-10	2.3406e-09	1.6509e-10	1.7121e-10	2.1708e-09	4.8501e-10	-6.024e-11	-1.5079e-09	3.4696e-10	6.4881e-10	7.6309e-10	-1.7986e-09	1.2904e-09	4.6143e-11	-6.2269e-10	-9.5584e-10
Qianlijing/WH1390	6.0698	11.768	-0.71164	-7.5418	5.072	-0.052313	2.0903	7.5348	9.7105	-22.831	2.1977	2.2809	-2.8296	9.3787	5.4264	-1.9236	-12.597	-1.7012e-09	-1.6297e-09	-1.0258e-09	-1.0972e-10	-1.9589e-10	6.9855e-10	-5.4895e-11	-1.2639e-09	-6.8622e-10	-1.0527e-09	6.3645e-12	7.7526e-10	6.0437e-10	-2.9732e-10	6.3593e-10	-1.7837e-10	-1.4739e-10	-1.613e-10	3.4558e-10	-6.1287e-10	4.3229e-10	7.5396e-11	7.9585e-10	-4.0409e-10	-7.1227e-10	2.7618e-10	6.0104e-10	6.5092e-11	-2.6189e-10	3.0197e-10	6.4261e-10	-3.9245e-10
Qianlijing/WH1394	4.3629	13.033	-10.243	-2.6061	0.37671	3.7478	19.606	19.024	15.997	-1.8912	3.637	1.7281	-9.3517	4.9373	7.4621	-0.61334	-0.63728	-1.6351e-09	-1.5377e-09	-1.3523e-09	-2.7652e-09	-2.2426e-11	1.0666e-09	-8.2269e-10	-2.327e-09	1.0903e-09	5.0141e-11	-5.6337e-12	1.5996e-09	-1.6239e-09	1.5366e-09	7.7228e-10	8.0361e-10	1.2465e-09	-8.043e-10	-4.381e-10	-9.513e-10	-3.2277e-10	-1.981e-09	6.7822e-10	4.0489e-10	-1.5645e-09	3.7691e-09	-2.1709e-10	4.5101e-10	1.1516e-09	-9.3292e-10	-1.2612e-09	1.3664e-09
Qianlijing/Wuyunjing8	-6.9414	3.1616	35.044	3.805	-6.6721	1.8874	8.4343	11.138	8.5301	-9.1638	8.4524	9.3475	-5.3265	7.6694	6.2703	0.10577	-1.2096	-1.398e-09	1.3557e-08	-3.0292e-10	-1.2061e-09	1.0824e-10	-3.3109e-10	1.8086e-09	1.3838e-09	4.9406e-10	6.6354e-10	-4.8767e-10	1.7193e-09	2.8927e-09	-1.8619e-09	-7.4817e-10	8.5688e-10	1.8923e-10	2.0863e-09	-2.5667e-09	3.1738e-09	-2.9123e-09	-2.372e-09	-4.3086e-10	1.517e-10	-3.2133e-10	-8.9064e-10	1.2311e-09	7.2389e-11	3.2184e-10	6.5413e-10	-1.5264e-10	-1.0859e-09
Qianlijing/YB	30.747	-0.43739	12.336	0.52824	3.4266	-9.8201	-0.7585	11.976	12.252	-4.8377	-0.88298	-2.4286	-1.9933	10.718	11.672	-10.017	1.4138	-1.5443e-09	-1.5469e-09	1.3635e-09	2.6354e-09	7.7904e-10	6.5827e-10	-1.7544e-09	-2.4611e-10	-1.2914e-09	4.8472e-10	-7.0163e-10	-2.6484e-09	-1.9791e-09	-1.3526e-09	-1.2617e-09	7.1508e-10	2.4706e-09	-1.1146e-09	-9.9625e-10	2.7197e-09	-7.6012e-10	1.454e-09	1.17e-09	-1.6149e-09	4.9773e-11	-8.4601e-10	-6.029e-10	8.6951e-10	7.7727e-10	-5.6993e-11	-3.3448e-10	2.8464e-09
R4115/110080	-16.693	-5.7171	5.0181	-9.3195	6.7346	19.704	-7.0043	10.275	-14.102	0.93974	-10.22	-13.012	-1.6333	6.2373	0.069858	1.6951	3.9465	-1.4581e-09	-1.9037e-09	1.7617e-09	-1.5089e-09	6.2632e-10	-1.6031e-09	-5.3404e-10	-9.1893e-10	1.2398e-09	1.109e-09	-2.0096e-10	-1.209e-09	-1.4001e-09	2.3848e-09	1.5539e-09	6.2997e-10	1.443e-09	3.2874e-09	4.726e-10	1.2289e-10	8.6936e-11	7.1869e-10	-8.3174e-10	5.1289e-10	-8.4895e-10	-7.6146e-10	1.1954e-09	1.1084e-09	-2.1238e-10	2.6e-12	-6.3164e-10	-1.0062e-09
R4115/610234	14.307	-15.239	1.2853	-1.6835	7.9027	7.1268	0.2044	-2.8709	-7.2908	6.1917	-9.9479	-2.5468	0.89353	11.34	3.6383	18.432	0.18575	1.9808e-08	-2.2856e-09	-1.0548e-09	4.4544e-10	-6.8168e-10	3.0094e-09	-1.2331e-09	1.275e-09	-9.6812e-11	-7.9516e-11	2.4005e-10	4.2789e-10	1.1299e-09	2.8749e-10	-8.1554e-10	-1.7704e-09	-9.3641e-10	-4.1674e-10	-2.805e-10	6.0937e-10	-1.5133e-09	2.035e-10	5.6476e-10	-1.9186e-09	2.523e-09	1.0508e-09	2.2221e-09	-1.9997e-10	-1.2742e-09	-3.7496e-10	-1.567e-09	1.4422e-09
R4115/9311K	14.586	-10.524	-6.0138	-5.5567	-1.8091	22.101	-5.7404	-4.2997	-7.7523	7.6848	-6.9695	8.2744	-4.2609	13.885	-6.3569	-1.4596	1.3314	-2.0937e-09	-1.8272e-09	-1.1249e-09	3.7556e-10	-1.6256e-11	7.3065e-10	7.3049e-13	2.2622e-10	2.621e-10	-1.8099e-11	-2.812e-09	-1.1956e-10	2.1839e-09	2.84e-09	1.7314e-09	-1.5664e-09	3.1421e-09	-1.2104e-09	-1.888e-10	8.1792e-10	1.7788e-09	1.8206e-09	2.9391e-10	4.7323e-10	-8.8945e-10	-7.0064e-10	-1.3871e-09	-6.4154e-10	-1.2411e-09	2.7876e-10	3.1255e-10	6.0373e-10
R4115/Balilla	12.532	-12.83	9.3865	2.964	1.7182	16.358	9.7348	-1.1204	0.69892	-3.7495	-21.603	-6.3646	4.735	4.5209	-11.244	2.9949	3.0306	2.0507e-08	-2.3203e-09	3.0157e-10	2.2384e-10	3.2274e-10	-3.4197e-10	-1.9437e-10	4.4477e-11	-3.2897e-10	-9.7357e-10	-1.4589e-10	2.2935e-10	-2.1945e-10	7.0754e-10	-4.2915e-10	-1.9087e-11	2.5234e-10	6.4271e-10	1.812e-10	6.4264e-11	-5.7524e-10	-1.1144e-10	2.3439e-11	2.6973e-10	8.0455e-10	2.2386e-10	6.0696e-10	-4.8471e-10	8.4497e-10	-2.8422e-10	-9.4217e-10	-8.7279e-10
R4115/C418	-13.735	-53.638	-5.7042	-8.4103	4.9031	6.7514	3.6287	2.929	-4.7337	0.91597	-7.3201	-0.13294	0.83011	7.4582	-3.5754	1.3058	0.66796	-2.0783e-09	-1.8111e-09	2.8322e-10	-7.9505e-10	-4.6357e-09	-1.0614e-09	-1.3548e-09	-1.3894e-09	-9.2627e-10	-1.125e-10	2.4639e-10	-2.63e-10	-6.2398e-10	-1.494e-09	-2.981e-09	2.0656e-09	-6.185e-10	3.9453e-10	-1.081e-09	1.2766e-09	-8.6434e-10	-4.6978e-10	3.362e-10	7.3284e-10	6.5029e-10	-1.8672e-09	-7.9734e-10	-1.8384e-09	2.2966e-09	3.7085e-10	-2.1602e-09	2.145e-09
R4115/JR2	-16.904	-9.0053	-1.9935	17.218	25.053	9.4115	-3.7681	5.9517	-4.653	5.239	-11.432	6.2382	4.2409	9.7306	-5.718	2.3196	1.6748	-2.2982e-09	-1.4281e-09	1.1083e-09	-3.3465e-10	-1.1369e-09	-2.5063e-09	-1.2345e-09	-2.9623e-09	2.1651e-10	1.2226e-10	-8.6108e-11	-1.1441e-09	5.1002e-11	8.0231e-11	-1.477e-09	9.5733e-10	-6.9717e-10	-1.3508e-09	-1.3988e-09	1.3454e-09	3.9363e-10	1.8756e-09	1.1336e-10	-8.9717e-10	3.7705e-10	1.0095e-09	-6.8338e-10	9.6779e-10	-1.9524e-09	6.7572e-10	1.5107e-09	8.1251e-10
R4115/Liaoxing1	-11.166	-6.1871	6.0241	-13.808	7.2588	-1.7726	3.7358	-0.34808	-11.62	7.0455	-24.478	6.027	-7.9593	5.479	-2.7948	1.3104	-1.0472	-2.258e-09	-1.9111e-09	6.0283e-10	-1.0706e-09	3.5015e-09	-1.3652e-09	-8.9825e-11	-1.1013e-10	-1.3181e-09	-1.2272e-09	1.2714e-09	9.1622e-10	5.6942e-10	-2.8636e-09	1.9161e-09	-3.8338e-10	-9.4662e-10	1.0698e-09	-4.3179e-10	-1.5241e-09	-3.4494e-10	5.1396e-10	-6.1418e-10	9.1328e-10	-1.9772e-10	1.3858e-09	-3.468e-11	1.1429e-09	1.0573e-09	-3.3301e-10	-1.5856e-09	-1.0069e-09
R4115/Mianhui725	11.098	-16.364	2.7011	7.2612	16.286	10.772	15.084	-6.2862	-21.005	0.86775	-4.689	-3.9853	-5.2975	6.219	-1.4074	-1.6584	-0.43442	-2.1839e-09	-1.868e-09	3.3418e-10	1.056e-09	-1.0303e-09	-4.1013e-10	1.1498e-10	6.1128e-10	-7.1048e-10	-9.3832e-10	-4.8244e-10	2.2936e-10	-2.7455e-10	-1.3781e-09	-1.9124e-09	-5.597e-10	8.9142e-10	-2.4253e-09	1.0069e-09	-7.4869e-11	-3.4262e-10	-6.661e-10	-1.5414e-09	-2.5312e-10	7.3827e-10	2.2087e-09	2.0782e-09	9.9981e-10	-1.2158e-09	5.5978e-11	-3.9481e-10	-3.8468e-10
R4115/Qianlijing	14.648	-11.437	12.058	-9.3792	15.502	11.814	9.0414	14.405	1.3986	-8.1025	-8.4031	4.7343	-5.8514	14.75	2.8248	1.2131	0.65533	-8.6288e-10	-1.5753e-09	2.3284e-10	-7.9941e-10	1.5258e-09	-6.7602e-11	2.6446e-10	-1.6839e-10	2.3763e-09	2.3166e-09	1.5491e-09	-5.7075e-10	-1.1142e-09	1.3814e-09	2.4267e-09	-9.8926e-10	-2.5607e-09	4.8897e-11	3.215e-10	-2.8989e-09	1.6233e-09	-3.0299e-09	5.9576e-10	-3.1416e-10	3.5118e-10	-1.121e-09	2.0479e-09	-6.2847e-10	3.5309e-10	-5.7319e-10	1.6845e-09	1.4625e-10
R4115/R465	18.472	-11.154	4.0372	-10.437	7.2935	4.0726	4.025	16.426	-16.505	6.8941	-5.0459	2.0407	7.4375	6.1018	-11.442	3.9382	-2.1457	-2.1587e-09	-1.8896e-09	-2.7887e-10	4.1183e-10	-1.0953e-09	-4.2535e-10	-2.2011e-10	2.0505e-09	1.2907e-09	9.9051e-10	3.2479e-09	-1.6143e-09	-4.2978e-10	-2.6248e-10	-7.0163e-10	-2.7339e-09	-2.1189e-09	-4.1805e-10	-2.6487e-10	-4.1388e-10	6.5924e-10	-1.3435e-09	-8.1643e-10	3.8112e-10	-8.8835e-10	-9.4451e-11	1.5152e-10	1.3263e-09	1.2173e-09	-9.1559e-11	2.3137e-09	1.4552e-09
R4115/WH1383	2.7668	-13.258	13.917	-16.802	25.043	8.4276	0.16379	-5.2922	1.1469	11.144	-2.7883	-6.5628	-6.7539	5.9671	-11.549	3.7028	-1.2106	-1.9144e-09	-1.6526e-09	1.1809e-09	-7.576e-11	-1.2733e-09	2.1112e-09	9.7691e-10	1.5287e-09	-1.3909e-10	1.4184e-09	6.9618e-10	4.9043e-10	2.7786e-10	-2.402e-09	2.7736e-09	-1.2972e-09	-7.5904e-10	1.0201e-09	-1.8992e-10	-1.5909e-11	6.1504e-10	-8.347e-11	-2.0011e-09	2.5067e-10	-3.5781e-09	2.0305e-09	-1.6854e-09	1.7167e-09	8.0903e-10	8.3007e-10	-2.6551e-09	3.4165e-10
R4115/WH1384	-2.219	-9.7079	5.0468	-17.299	16.613	17.925	7.933	-4.5075	-6.514	6.685	-9.7604	5.434	13.269	3.5067	3.9473	-0.27955	1.4724	-2.189e-09	-1.8893e-09	-2.2235e-09	7.4411e-10	1.728e-09	-8.0924e-10	1.7918e-09	3.3522e-11	-1.8556e-09	-8.5957e-10	-3.0428e-09	-1.3109e-10	-1.5579e-09	4.7931e-10	-1.9648e-09	6.2401e-12	1.7465e-09	2.7681e-10	-1.5123e-09	-3.3818e-10	7.2469e-10	-1.3021e-09	8.5955e-10	8.4935e-10	-1.2187e-09	9.8798e-10	-7.5202e-10	2.0261e-09	-5.3832e-10	9.689e-12	1.615e-09	2.6015e-10
R4115/WH1390	-10.001	-3.5897	-5.7339	-9.7142	9.7245	8.8328	2.3137	-3.5061	-7.2581	-6.6944	-9.5716	-4.3079	4.9679	15.964	-5.2048	1.6219	-12.064	-2.2593e-09	-1.906e-09	1.2219e-11	-1.6443e-09	1.4854e-10	-7.4491e-10	1.4075e-10	-5.1057e-11	-2.6112e-10	-1.1186e-09	-6.8895e-10	-9.765e-10	-2.5831e-10	-2.3111e-09	-9.7826e-10	1.9937e-09	1.3049e-09	3.5693e-12	7.2609e-10	9.5617e-10	2.897e-10	2.6392e-11	6.7056e-10	-5.2079e-10	1.5623e-09	-6.1554e-10	3.5952e-10	-4.8945e-10	-3.5909e-10	-2.3778e-09	8.442e-10	-2.505e-09
R4115/WH1392	-7.6852	-3.048	-3.2936	-13.967	11.08	1.0777	6.9322	-4.1657	-9.7784	-4.4226	-4.8876	0.025556	2.6824	15.674	-8.189	3.8425	12.025	-2.0118e-09	1.3645e-08	-8.6488e-10	-1.1063e-09	1.4896e-09	-6.4858e-10	-2.0369e-09	-2.5719e-10	6.6711e-10	-3.2477e-10	1.706e-09	1.3245e-09	3.723e-09	-9.5249e-10	-1.1299e-09	2.6097e-09	1.8899e-09	-5.9162e-10	1.722e-09	-2.2187e-10	-1.6319e-09	5.2639e-10	2.2382e-09	-6.0276e-10	-3.8775e-10	-7.8972e-10	-8.8535e-10	1.0028e-10	-2.2883e-10	3.1976e-09	-4.8527e-10	-7.2482e-10
R4115/WH1394	-11.708	-2.3243	-15.266	-4.7785	5.0292	12.633	19.83	7.9826	-0.97181	14.245	-8.1322	-4.8607	-1.5542	11.523	-3.1691	2.9321	-0.10443	-2.2203e-09	-1.9019e-09	1.2177e-10	7.8806e-10	9.1185e-10	-7.7199e-10	2.3938e-09	-1.1849e-10	1.1472e-09	-2.8067e-10	-1.0781e-09	-2.7765e-10	-5.1805e-10	9.6112e-10	8.1741e-10	-1.9969e-09	-5.787e-10	-7.1834e-10	1.433e-09	1.2496e-09	-1.9887e-09	1.1877e-09	1.1299e-09	2.3646e-10	2.2601e-09	-1.0219e-09	-5.3304e-10	-2.4296e-09	2.117e-09	7.8215e-10	-2.8193e-10	-5.9325e-10
R4115/Wuyunjing8	-23.012	-12.196	30.021	1.6326	-2.0196	10.773	8.6577	0.096759	-8.4385	6.9725	-3.3169	2.7587	2.471	14.255	-4.3609	3.6512	-0.67674	-1.9776e-09	1.3208e-08	-1.2491e-09	1.4459e-09	-1.0521e-09	1.1271e-09	-3.3368e-10	-2.7988e-09	-1.3685e-09	-8.0359e-10	-5.7695e-10	3.3081e-09	-4.3222e-10	5.3775e-10	1.3126e-09	2.6351e-09	-7.4111e-10	-2.6298e-10	1.4478e-10	-2.374e-11	2.7893e-09	1.8811e-09	-3.8955e-11	-8.9824e-10	-1.2575e-09	-1.8722e-09	-1.6701e-09	-2.475e-10	1.8036e-09	-9.8079e-10	1.7069e-09	-8.6183e-10
R4115/YB	14.677	-15.795	7.3133	-1.6442	8.0791	-0.93496	-0.53505	0.93495	-4.7164	11.299	-12.652	-9.0175	5.8042	17.303	1.0409	-6.4712	1.9466	-2.0968e-09	-1.8426e-09	1.0073e-09	1.9562e-09	8.2851e-10	3.6064e-09	1.4507e-09	3.0272e-09	-3.5939e-10	2.9271e-10	8.4161e-11	-5.0534e-10	-1.2162e-09	2.3578e-09	-3.5647e-10	4.0892e-10	-5.8697e-10	9.7186e-10	-5.6943e-10	-8.986e-10	-1.9873e-09	-1.8034e-09	-9.7013e-10	9.201e-10	4.0212e-10	5.8992e-11	7.0226e-11	-2.6709e-09	-3.0544e-09	-1.33e-09	2.4499e-10	3.1245e-10
R465/110080	3.2019	9.9237	2.0191	-8.2049	-6.1268	3.0772	-12.244	23.337	-15.038	-0.19999	4.9061	-9.1164	3.8581	-8.9961	-3.566	0.87481	0.61261	-2.1573e-09	-1.8932e-09	-2.0058e-09	1.0577e-09	2.2817e-09	-2.2212e-11	-2.1282e-10	3.8173e-09	-3.6941e-10	-3.2371e-10	1.6693e-09	-1.8907e-09	1.952e-09	-2.3319e-10	-1.1579e-09	-1.3495e-09	-6.3703e-10	6.2081e-10	1.8093e-09	-1.0107e-09	-1.4887e-09	8.148e-10	-7.2479e-10	1.3298e-09	-1.751e-09	-8.6425e-10	4.123e-10	-4.5735e-10	1.7795e-09	-8.2239e-10	-3.3208e-10	-8.4895e-10
R465/610234	34.201	0.40189	-1.7136	-0.56886	-4.9587	-9.4996	-5.0354	10.191	-8.2262	5.052	5.1785	1.3484	6.385	-3.8937	0.0023809	17.612	-3.1481	1.9063e-08	-2.2445e-09	1.8526e-09	4.4433e-10	-1.2276e-10	-1.8161e-09	-2.7311e-09	-1.6831e-09	-1.6573e-09	7.3725e-10	-3.8168e-09	1.9463e-09	1.1127e-09	2.9007e-09	-4.987e-10	8.6207e-10	-1.4742e-09	-3.1306e-11	-1.6915e-09	-7.2678e-10	1.7992e-09	-1.328e-09	1.2083e-09	2.8557e-10	-1.1595e-09	-1.0237e-09	3.1174e-09	2.0378e-09	3.6377e-10	-2.1184e-09	-5.6744e-10	7.102e-10
R465/9311K	34.481	5.1168	-9.0128	-4.4421	-14.67	5.4751	-10.98	8.7623	-8.6876	6.545	8.157	12.17	1.2305	-1.3481	-9.9928	-2.2799	-2.0025	-2.8141e-09	-1.8074e-09	3.054e-09	1.0978e-09	3.5633e-09	6.5173e-10	-8.0056e-10	-1.1379e-09	-1.1616e-09	-2.8455e-09	-1.7571e-09	-1.7561e-10	-2.6006e-10	1.0201e-09	2.6403e-10	2.4127e-09	6.6175e-10	5.0767e-10	-1.0272e-09	-1.1524e-09	-7.4634e-10	7.9261e-10	-8.0796e-10	5.5208e-10	1.7718e-09	6.2401e-10	-3.2019e-09	-1.2869e-09	-6.3809e-10	5.3412e-10	-1.1614e-09	3.558e-11
R465/Balilla	32.426	2.8114	6.3875	4.0786	-11.143	-0.26802	4.495	11.942	-0.23647	-4.8892	-6.4768	-2.4695	10.226	-10.713	-14.88	2.1746	-0.30329	1.9728e-08	-2.3173e-09	7.5281e-10	-4.3037e-09	-2.89e-10	1.8172e-09	-1.6985e-09	-6.0413e-11	-3.9563e-10	-1.3192e-09	7.7922e-10	-6.0196e-10	1.9696e-09	-4.2899e-10	7.0693e-11	-1.576e-09	2.4454e-09	-1.635e-09	-4.7389e-09	8.8842e-11	-2.3536e-10	1.1787e-09	5.7962e-10	1.8663e-09	-8.6042e-10	-6.0988e-10	-1.6734e-09	4.6122e-10	1.1351e-09	6.3582e-10	1.5628e-09	3.4944e-10
R465/C418	6.1599	-37.997	-8.7031	-7.2957	-7.9583	-9.875	-1.6111	15.991	-5.6691	-0.22375	7.8063	3.7622	6.3216	-7.7752	-7.2113	0.48544	-2.6659	-2.8281e-09	-1.7923e-09	-3.8618e-09	2.7386e-09	5.1501e-10	9.3983e-10	-9.0751e-10	-1.1624e-10	1.4958e-09	4.8405e-10	1.3191e-10	8.1224e-10	-1.7271e-09	-2.0134e-09	-1.5844e-09	-3.5089e-10	3.7662e-10	-1.2492e-09	1.2658e-09	1.8142e-09	1.2308e-09	1.4554e-10	1.1173e-09	-5.2391e-11	-1.5582e-10	1.9406e-09	-1.1637e-09	1.9997e-09	-4.5217e-10	-5.6374e-10	-1.5732e-09	-1.3157e-09
R465/JR2	2.9903	6.6355	-4.9925	18.333	12.191	-7.2149	-9.0079	19.014	-5.5884	4.0993	3.6943	10.133	9.7324	-5.5028	-9.3538	1.4992	-1.6591	-3.0013e-09	-1.4374e-09	-2.0383e-09	-1.2246e-09	-6.4432e-10	-1.827e-11	2.4946e-10	-2.4264e-09	-1.1623e-09	-1.5163e-09	3.5251e-11	2.2467e-09	-1.1859e-09	7.7225e-10	-2.4509e-10	-4.5109e-11	-2.2739e-09	-1.2346e-09	1.3537e-09	-7.4103e-10	-1.3143e-09	-1.5665e-10	3.0873e-10	-2.0286e-09	-8.1899e-10	1.3281e-09	-1.1338e-09	-1.8835e-09	-7.0509e-11	-1.2096e-09	-6.0418e-10	-3.3162e-09
R465/Liaoxing1	8.7284	9.4537	3.0251	-12.694	-5.6026	-18.399	-1.504	12.714	-12.555	5.9058	-9.3515	9.9221	-2.4678	-9.7545	-6.4307	0.49008	-4.3811	-2.9661e-09	-1.9268e-09	-1.4417e-09	5.565e-10	-2.0769e-09	-2.6907e-09	1.1683e-09	5.9179e-10	3.04e-09	2.1388e-10	-1.3889e-09	-1.5384e-09	-7.6392e-10	2.0859e-09	-8.8753e-10	9.721e-10	-4.5414e-10	2.6252e-09	7.7534e-10	8.7142e-10	2.0003e-09	1.042e-09	-6.1375e-10	2.5098e-09	4.4715e-10	-2.558e-10	5.709e-10	-1.0833e-09	1.0458e-09	-1.1058e-09	-2.9488e-10	1.1843e-09
R465/Mianhui725	30.992	-0.72274	-0.2979	8.3758	3.4249	-5.8549	9.8444	6.7758	-21.941	-0.27197	10.437	-0.090133	0.19391	-9.0145	-5.0432	-2.4788	-3.7683	-2.9374e-09	-1.853e-09	2.8864e-09	-2.1433e-09	-4.2897e-10	1.6531e-09	2.6998e-09	-2.6036e-09	-1.1805e-09	1.7612e-09	-5.9736e-10	-6.145e-10	3.5037e-10	-2.3315e-10	-2.0798e-09	2.1267e-10	-1.2779e-09	6.6082e-10	-6.4271e-10	-2.7507e-09	2.7591e-11	-4.0081e-10	-3.1399e-10	-6.9244e-10	-8.6454e-10	3.4514e-10	-2.024e-09	-1.5924e-09	-2.9313e-11	4.8246e-10	-7.9752e-10	1.934e-09
R465/Qianlijing	34.542	4.2037	9.0594	-8.2646	2.641	-4.8125	3.8016	27.467	0.46319	-9.2422	6.7233	8.6295	-0.35998	-0.48338	-0.81107	0.39277	-2.6786	-1.6298e-09	-1.551e-09	1.22e-09	6.2811e-10	5.6454e-10	2.4909e-09	-1.1184e-09	2.0243e-09	6.2065e-10	-4.2536e-10	-3.2912e-09	7.8331e-11	-1.26e-09	6.8109e-10	1.9244e-09	6.4238e-10	-1.2018e-09	-9.9362e-10	2.8178e-09	-2.2713e-10	-1.204e-09	1.398e-09	-3.1266e-09	-2.3962e-09	-6.1705e-10	-2.357e-09	-1.9747e-10	5.6419e-10	3.4071e-10	1.1582e-09	1.4613e-09	9.5201e-11
R465/R4115	18.472	-11.154	4.0372	-10.437	7.2935	4.0726	4.025	16.426	-16.505	6.8941	-5.0459	2.0407	7.4375	6.1018	-11.442	3.9382	-2.1457	-2.1587e-09	-1.8896e-09	-2.7887e-10	4.1183e-10	-1.0953e-09	-4.2535e-10	-2.2011e-10	2.0505e-09	1.2907e-09	9.9051e-10	3.2479e-09	-1.6143e-09	-4.2978e-10	-2.6248e-10	-7.0163e-10	-2.7339e-09	-2.1189e-09	-4.1805e-10	-2.6487e-10	-4.1388e-10	6.5924e-10	-1.3435e-09	-8.1643e-10	3.8112e-10	-8.8835e-10	-9.4451e-11	1.5152e-10	1.3263e-09	1.2173e-09	-9.1559e-11	2.3137e-09	1.4552e-09
R465/WH1383	22.661	2.383	10.918	-15.688	12.182	-8.1988	-5.076	7.7698	0.21147	10.004	12.338	-2.6676	-1.2624	-9.2664	-15.185	2.8825	-4.5445	-2.6452e-09	-1.6405e-09	6.5054e-10	1.0013e-09	2.5043e-10	-1.1006e-09	1.0159e-09	2.0291e-10	-3.1793e-10	-2.2051e-10	-3.189e-10	-5.6998e-11	-4.3277e-10	1.4952e-10	4.8368e-10	-7.8781e-11	-3.7271e-10	-7.5503e-10	1.9527e-10	1.1371e-09	5.5073e-10	4.8051e-11	-5.5073e-11	6.1278e-10	-1.5966e-10	5.798e-10	6.1961e-10	-8.8604e-11	-1.0425e-09	1.9292e-10	-1.0284e-09	1.8215e-10
R465/WH1384	17.675	5.9329	2.0479	-16.185	3.7519	1.299	2.6932	8.5545	-7.4494	5.5453	5.3661	9.3291	18.76	-11.727	0.31137	-1.0999	-1.8615	-2.9033e-09	-1.867e-09	1.1815e-09	6.5888e-10	-5.1858e-10	-7.1015e-10	-1.3426e-10	1.6913e-09	-1.573e-09	1.2597e-09	1.5729e-09	-3.6081e-10	1.8003e-09	-1.3497e-11	1.1872e-09	-4.0683e-10	1.1893e-09	2.1842e-10	-1.3243e-09	1.3726e-09	-7.9926e-10	-5.5155e-10	2.6319e-09	-2.0629e-09	2.5767e-09	3.0426e-09	-1.5101e-10	-2.6179e-09	1.3543e-09	-9.262e-11	-6.7532e-10	-1.2491e-09
R465/WH1390	9.8938	12.051	-8.7328	-8.5996	-3.1368	-7.7936	-2.9261	9.5559	-8.1935	-7.8341	5.5549	-0.41274	10.459	0.73044	-8.8406	0.80153	-15.398	-2.9336e-09	-1.8873e-09	-2.5225e-09	-9.0891e-10	-4.3263e-10	-1.6016e-09	4.086e-10	-3.3466e-10	8.1239e-10	2.1798e-09	3.3277e-10	-3.8339e-10	2.0293e-09	-1.4465e-10	2.1641e-09	1.9439e-09	-7.8973e-10	-1.5068e-09	-9.8618e-10	-1.5428e-09	-1.345e-09	-5.0467e-10	1.0206e-09	-1.8652e-09	6.2544e-11	-1.9201e-10	2.2565e-09	-1.6051e-09	-5.3639e-10	6.4892e-11	-2.6301e-10	2.0813e-09
R465/WH1392	12.209	12.593	-6.2926	-12.852	-1.7813	-15.549	1.6924	8.8963	-10.714	-5.5623	10.239	3.9207	8.1739	0.44077	-11.825	3.0221	8.691	-2.7404e-09	1.3661e-08	-2.0317e-09	2.6373e-10	-5.3401e-10	-2.0772e-10	2.4168e-10	-1.8005e-10	-6.6724e-10	-3.1287e-10	2.7628e-10	-2.1405e-09	-1.5681e-09	1.093e-09	-7.8171e-10	3.459e-10	1.3536e-09	3.4957e-10	-2.6621e-09	8.5673e-10	-8.7075e-10	-1.4343e-10	7.0783e-10	1.2418e-09	2.1011e-09	-1.4651e-10	8.1471e-10	2.03e-09	8.2292e-11	1.6963e-10	1.4891e-09	-7.2183e-11
R465/WH1394	8.187	13.317	-18.265	-3.6639	-7.8321	-3.9935	14.59	21.045	-1.9072	13.105	6.9942	-0.96556	3.9372	-3.7109	-6.805	2.1118	-3.4383	-2.8937e-09	-1.8822e-09	-1.5781e-09	-1.719e-09	-8.5148e-10	1.3961e-09	9.1978e-10	1.3573e-09	4.9002e-10	-5.0041e-10	1.7965e-09	2.1368e-09	-2.6019e-10	5.0659e-10	1.9833e-09	7.7842e-10	4.6596e-10	-1.6133e-09	2.1186e-09	2.3332e-09	1.7648e-09	4.4943e-10	-1.9194e-09	-5.6392e-11	2.4834e-10	2.0287e-10	2.9828e-11	1.5587e-09	-1.1242e-09	1.3442e-09	-1.2004e-09	-9.9062e-10
R465/Wuyunjing8	-3.1174	3.4448	27.022	2.7472	-14.881	-5.8539	3.4179	13.159	-9.3739	5.8328	11.81	6.6538	7.9625	-0.97889	-7.9968	2.8309	-4.0106	-2.6846e-09	1.3337e-08	6.0743e-10	1.6916e-10	-1.3481e-10	3.4101e-11	2.1281e-09	-1.8546e-09	1.0587e-09	1.5382e-09	1.5843e-09	1.1888e-09	-4.9903e-10	-1.9666e-09	-8.0614e-10	-7.6555e-10	3.5551e-09	4.1108e-09	1.6177e-09	-4.1196e-10	1.5382e-09	4.0532e-10	8.6116e-10	1.9566e-09	1.9044e-09	-7.1566e-10	6.2065e-10	8.8582e-11	-3.167e-09	1.7219e-09	1.4418e-09	-1.5256e-09
R465/YB	34.571	-0.15416	4.3144	-0.52959	-4.7822	-17.561	-5.7749	13.997	-5.6518	10.159	2.4742	-5.1223	11.296	2.0698	-2.595	-7.2916	-1.3873	-2.8202e-09	-1.8286e-09	3.8785e-09	1.7723e-09	7.9014e-11	-9.4063e-10	-5.0036e-10	-1.2371e-09	-4.8235e-10	-1.8109e-09	-4.1552e-10	9.3939e-10	-1.0437e-09	-3.8384e-09	9.0733e-10	-9.03e-10	3.6622e-10	-3.3881e-11	1.4816e-09	1.0718e-09	-1.2917e-09	-1.8219e-09	-8.4932e-11	-1.2754e-09	-1.9165e-09	-1.514e-09	1.2616e-09	5.0426e-10	-7.7988e-10	-2.0346e-10	-2.8514e-10	1.3821e-09
WH1383/110080	-12.503	7.8199	11.899	-14.57	11.623	7.4323	-16.105	1.619	2.6146	4.0496	7.1638	-17.72	-10.333	-9.1309	-3.6731	0.63942	1.5477	-1.9273e-09	-1.6796e-09	5.2547e-10	9.9475e-10	-3.1758e-09	-1.7007e-09	-8.835e-10	-1.5359e-10	-7.4898e-10	1.6842e-09	-5.2499e-10	2.1798e-09	-2.3024e-09	-8.4219e-11	-1.1117e-09	-7.9015e-10	1.0199e-09	-1.4563e-09	7.0711e-10	1.5876e-10	1.3609e-09	-1.9207e-10	-1.6103e-10	-2.0937e-09	9.9056e-10	1.7769e-11	-7.6764e-10	-6.0662e-10	8.5522e-12	-1.1805e-09	8.6783e-10	1.7668e-09
WH1383/610234	18.496	-1.702	8.1665	-6.9342	12.791	-5.1446	-8.8966	-11.527	9.4261	9.3015	7.4362	-7.255	-7.8064	-4.0285	-0.10474	17.376	-2.213	1.9321e-08	-2.0112e-09	6.1366e-10	1.9121e-09	1.0878e-10	-5.2437e-10	-4.589e-11	3.1174e-10	-9.3384e-10	-1.7034e-10	9.9445e-10	3.977e-10	2.4725e-10	-4.1628e-10	3.4751e-10	-9.2609e-11	-1.8856e-10	-7.0612e-10	6.7305e-10	1.3962e-11	2.0008e-11	7.3139e-10	1.0775e-09	2.9937e-10	7.8571e-11	-1.4457e-10	3.4884e-10	1.1661e-10	-7.8934e-10	6.5117e-10	3.3524e-10	-1.1813e-09
WH1383/9311K	18.776	3.0129	0.86736	-10.807	3.0791	9.8301	-14.841	-12.956	8.9646	10.795	10.415	3.5661	-12.961	-1.4829	-10.1	-2.5153	-1.0674	-2.5456e-09	-1.5713e-09	1.0783e-09	-4.8497e-10	-1.6264e-09	8.5922e-10	-2.4531e-10	-1.5659e-09	9.3266e-10	-3.0282e-09	-7.4164e-10	-1.3701e-09	2.0386e-09	4.2918e-10	-3.9773e-11	-6.1518e-10	-2.3282e-09	1.817e-10	1.8967e-10	2.8402e-09	-8.1068e-10	-3.9388e-10	9.0184e-10	8.3466e-10	7.4708e-10	8.1622e-10	1.0398e-09	1.1624e-09	1.4051e-09	-2.8313e-09	-5.0017e-10	-8.0488e-10
WH1383/Balilla	16.721	0.70751	16.268	-2.2867	6.6064	4.087	0.63377	-9.7767	17.416	-0.63963	-4.2192	-11.073	-3.965	-10.847	-14.987	1.9392	0.63183	2.0045e-08	-2.0804e-09	-4.0656e-10	2.7915e-09	-1.7679e-09	-7.6807e-11	2.738e-10	1.4262e-09	-6.2778e-10	8.839e-10	2.5969e-09	1.5376e-09	1.0267e-09	-2.1015e-09	1.0863e-09	2.363e-09	1.1008e-09	-2.2803e-09	-1.2857e-09	-2.3987e-09	2.8287e-10	-8.8193e-10	-6.2506e-10	3.9685e-10	1.3924e-09	4.0939e-10	-1.2084e-09	-1.085e-09	-1.1121e-09	-2.1911e-09	2.8572e-09	-1.5958e-09
WH1383/C418	-9.5451	-40.101	1.177	-13.661	9.7913	-5.52	-5.4723	-5.7274	11.983	4.0258	10.064	-4.8412	-7.8698	-7.91	-7.3184	0.25005	-1.7308	-2.5134e-09	-1.5807e-09	-1.782e-10	-2.4609e-09	-5.4152e-12	-4.2915e-10	1.2318e-09	-4.9002e-10	-1.1526e-09	9.409e-11	-8.0686e-11	1.2355e-09	-1.6607e-09	1.4049e-09	1.9928e-09	9.692e-10	-4.7298e-10	1.9965e-09	-1.9982e-09	1.0048e-09	-1.1189e-10	2.2947e-09	-2.1902e-09	-9.8948e-10	2.2866e-09	9.2907e-10	7.7715e-10	2.4774e-10	-3.561e-10	7.5525e-10	-1.2834e-09	1.7509e-09
WH1383/JR2	-12.715	4.5317	4.8877	11.968	29.941	-2.8599	-12.869	-2.7046	12.064	8.3489	5.952	1.53	-4.459	-5.6376	-9.461	1.2639	-0.72402	-2.7021e-09	-1.2615e-09	-1.0755e-09	6.4226e-10	3.9904e-09	-1.3323e-10	-1.5432e-09	7.0174e-10	1.1035e-09	4.1682e-10	-1.1995e-09	-6.9623e-10	-1.0998e-09	-1.202e-09	-1.1618e-09	-2.7092e-10	1.9957e-09	8.0325e-10	1.1912e-09	2.2814e-09	-1.1616e-09	5.9717e-10	-8.8097e-10	1.1319e-09	7.4175e-10	-1.0655e-11	1.5369e-09	-2.8573e-09	3.2362e-09	9.6372e-10	-5.9365e-11	2.9748e-09
WH1383/Mianhui725	15.287	-2.8266	9.5822	2.0104	21.174	-1.4998	5.9831	-14.943	-4.2882	3.9776	12.695	-8.6935	-13.997	-9.1493	-5.1504	-2.7142	-2.8332	-2.5879e-09	-1.6348e-09	2.3311e-10	2.3594e-10	4.9922e-10	7.2136e-11	4.0841e-10	-1.461e-10	-6.1608e-10	6.9665e-10	2.635e-10	2.9581e-10	4.4145e-10	9.236e-11	1.3238e-09	-3.4117e-10	-1.2232e-09	-1.1441e-10	4.5301e-10	-1.9792e-10	-4.3666e-10	6.1726e-11	1.0988e-09	5.1618e-10	8.3169e-11	7.8274e-10	2.2002e-10	1.0147e-09	3.5156e-10	5.9029e-10	-3.9495e-11	4.6863e-10
WH1383/Qianlijing	18.837	2.0998	18.94	-14.63	20.391	-0.4575	-0.059656	5.7488	18.115	-4.9926	8.9809	0.026093	-14.551	-0.61815	-0.91819	0.15738	-1.7434	-1.362e-09	-1.3281e-09	-1.3667e-09	2.2555e-09	-3.9536e-10	-1.8192e-09	-1.4459e-09	1.0868e-10	-9.5223e-10	-9.6982e-10	6.4165e-10	1.7407e-09	1.7521e-09	-9.773e-10	-5.3613e-10	3.011e-10	-1.2304e-09	6.6487e-10	-1.6305e-09	8.145e-10	2.7579e-09	-1.0297e-10	-5.3754e-10	1.0613e-09	1.5126e-09	-1.0542e-09	-1.1948e-09	-1.0434e-09	-1.7803e-09	5.1059e-10	8.2706e-10	-4.9052e-11
WH1383/R4115	2.7668	-13.258	13.917	-16.802	25.043	8.4276	0.16379	-5.2922	1.1469	11.144	-2.7883	-6.5628	-6.7539	5.9671	-11.549	3.7028	-1.2106	-1.9144e-09	-1.6526e-09	1.1809e-09	-7.576e-11	-1.2733e-09	2.1112e-09	9.7691e-10	1.5287e-09	-1.3909e-10	1.4184e-09	6.9618e-10	4.9043e-10	2.7786e-10	-2.402e-09	2.7736e-09	-1.2972e-09	-7.5904e-10	1.0201e-09	-1.8992e-10	-1.5909e-11	6.1504e-10	-8.347e-11	-2.0011e-09	2.5067e-10	-3.5781e-09	2.0305e-09	-1.6854e-09	1.7167e-09	8.0903e-10	8.3007e-10	-2.6551e-09	3.4165e-10
WH1383/WH1384	1.9705	3.8291	11.928	-22.55	21.501	5.6541	-1.1681	-13.164	10.203	9.7949	7.6237	0.72572	4.5687	-11.862	0.20425	-1.3353	-0.92638	-2.6387e-09	-1.6591e-09	-7.7393e-10	-1.9903e-09	-1.8703e-10	-1.2946e-09	4.3786e-10	7.4672e-10	1.3768e-09	-1.5364e-09	-4.0929e-10	-2.2629e-09	4.4623e-11	1.9819e-09	-1.6962e-09	-8.6029e-10	7.7392e-10	1.4761e-09	6.181e-10	-3.9182e-09	-1.1068e-10	1.7964e-10	2.0352e-09	-7.9227e-10	-1.8138e-09	-1.7885e-09	1.1623e-10	-2.3351e-10	-1.6103e-10	6.6647e-10	-1.6977e-09	-6.9599e-10
WH1383/WH1390	-5.8112	9.9473	1.1473	-14.965	14.613	-3.4386	-6.7873	-12.162	9.4588	-3.5845	7.8125	-9.0162	-3.7321	0.59566	-8.9478	0.56614	-14.463	-2.685e-09	-1.6831e-09	-1.3024e-09	1.0091e-09	6.1647e-10	2.3501e-09	2.6167e-10	-1.1132e-09	-1.1355e-09	6.1682e-10	1.0711e-10	-4.0383e-10	1.3544e-10	1.3094e-09	-1.6261e-09	2.6967e-10	-1.2607e-10	9.5697e-10	1.423e-09	-3.3441e-09	-3.0621e-10	1.1847e-10	1.8944e-09	-1.7211e-09	-1.7078e-09	-2.8586e-09	-5.4167e-11	1.0958e-09	7.4638e-10	1.003e-09	-3.8424e-10	-3.9971e-10
WH1383/WH1392	-3.4957	10.489	3.5875	-19.218	15.968	-11.194	-2.1689	-12.822	6.9385	-1.3128	12.496	-4.6827	-6.0175	0.306	-11.932	2.7867	9.6261	-2.4555e-09	1.3843e-08	3.2311e-10	-2.4599e-10	2.0457e-10	-1.7773e-10	7.4421e-10	3.8234e-10	5.0971e-10	-1.4283e-10	1.8673e-11	1.0578e-10	-4.5017e-10	6.7306e-10	-1.3101e-10	-4.8003e-10	1.1523e-09	-4.775e-10	1.0628e-09	2.4656e-10	-2.769e-10	-3.2911e-10	1.4732e-10	4.4903e-10	4.239e-11	5.0637e-10	6.2729e-10	2.7558e-10	5.7478e-10	2.4228e-10	-3.9165e-10	-2.9703e-10
WH1383/WH1394	-7.5181	11.213	-8.3845	-10.029	9.9174	0.36152	10.729	-0.67374	15.745	17.355	9.2518	-9.569	-10.254	-3.8457	-6.9121	1.8764	-2.5032	-2.6092e-09	-1.6799e-09	-9.0962e-10	-4.4777e-10	2.4965e-09	1.4673e-09	-8.6798e-10	-1.5803e-09	1.1433e-09	5.264e-11	2.0141e-09	-8.9758e-10	-8.205e-10	4.2109e-10	-1.0699e-09	2.7377e-10	1.3445e-09	3.9977e-10	-9.3111e-10	-7.7187e-11	-1.6384e-09	-1.8698e-09	6.1138e-11	2.899e-10	-1.6828e-09	1.209e-09	6.002e-10	9.5618e-10	-1.0044e-09	-1.8064e-09	6.8794e-10	6.3035e-10
WH1383/Wuyunjing8	-18.822	1.3409	36.903	-3.6181	2.8686	-1.4989	-0.44331	-8.5596	8.2784	10.082	14.067	-1.9496	-6.2289	-1.1137	-8.1039	2.5955	-3.0755	-2.4454e-09	1.3472e-08	9.5423e-10	-2.4876e-09	1.6386e-09	7.4027e-10	-2.4322e-09	-3.7274e-10	1.5036e-09	2.1146e-09	-2.5259e-09	4.0681e-10	8.1417e-10	1.9351e-09	-4.128e-10	-3.8141e-09	3.2647e-10	-1.0332e-09	1.347e-10	-2.4747e-10	-1.5895e-09	1.22e-09	-1.6306e-09	7.0301e-12	3.4474e-10	-4.7722e-10	-9.2236e-10	-5.0026e-10	-4.3334e-10	8.3605e-10	7.4411e-10	-8.6213e-10
WH1383/YB	18.866	-2.258	14.194	-6.8949	12.967	-13.206	-9.6361	-7.7214	12.001	14.408	4.7318	-13.726	-2.8957	1.935	-2.7021	-7.527	-0.45215	-2.5186e-09	-1.574e-09	1.3637e-09	-1.1974e-09	-8.4226e-10	-1.2091e-09	3.1747e-09	3.8833e-10	-6.2467e-10	-1.8286e-09	-1.053e-09	-2.3313e-09	-1.0899e-10	-9.6391e-10	7.8985e-10	3.9673e-09	-1.3285e-09	-1.7029e-09	5.7967e-10	2.302e-09	7.8368e-10	-1.1419e-09	1.9997e-09	6.8566e-10	7.4449e-10	-8.4983e-11	8.5458e-10	4.8807e-10	-9.0523e-10	1.6058e-09	1.1579e-09	-2.6433e-09
WH1384/110080	-17.489	11.37	3.0288	-15.067	3.1929	16.93	-8.3362	2.4037	-5.0462	-0.40908	0.1917	-5.7231	9.6893	-11.591	11.823	-3.3429	4.2307	-2.1906e-09	-1.8584e-09	2.0822e-12	4.6395e-10	5.5467e-10	8.9055e-10	9.0283e-10	-8.8356e-10	-8.57e-10	-1.8421e-09	-1.5976e-10	-8.1805e-10	-2.3503e-09	7.6714e-10	1.5358e-10	-1.9218e-09	3.8613e-10	-2.2686e-09	5.8097e-10	8.6634e-10	2.3286e-09	1.7854e-09	-2.6169e-11	7.5448e-11	9.9369e-10	1.9643e-09	1.3299e-09	-1.4371e-10	1.0085e-09	9.0464e-10	5.7367e-10	-1.3271e-09
WH1384/610234	13.511	1.8479	-0.704	-7.4311	4.3611	4.3532	-1.1274	-10.743	1.7652	4.8429	0.46411	4.7417	12.216	-6.4888	15.392	13.394	0.46995	1.9038e-08	-2.2108e-09	1.1909e-09	-6.5807e-10	-6.9253e-10	-1.606e-10	-2.2129e-09	1.5327e-09	1.7841e-09	1.5434e-09	-8.8478e-10	1.2106e-09	3.5377e-10	1.2363e-09	-4.8874e-10	7.3931e-10	6.5994e-11	2.4616e-09	5.9152e-10	-3.23e-10	-2.59e-09	1.036e-09	-9.1245e-10	1.4979e-10	1.3501e-09	-2.521e-10	-2.5749e-09	-1.0612e-10	-1.2916e-09	-2.2909e-09	-5.8929e-10	-1.2914e-09
WH1384/9311K	13.79	6.5628	-8.0032	-11.304	-5.3507	19.328	-7.0722	-12.171	1.3038	6.3359	3.4425	15.563	7.0617	-3.9432	5.3967	-6.4977	1.6156	-2.8327e-09	-1.7788e-09	-1.6536e-10	-1.3329e-09	-1.686e-09	-9.9442e-10	-2.6353e-09	-5.9042e-10	7.8275e-11	1.8015e-09	5.1453e-10	-1.4996e-09	8.7903e-10	-1.0656e-09	3.5577e-10	-1.2035e-09	-8.9933e-10	1.1074e-09	-6.434e-10	7.244e-10	2.6597e-10	-6.7496e-10	-6.0956e-10	-3.6537e-10	-1.0846e-09	-1.3477e-10	-7.2742e-10	2.5049e-09	-2.1031e-09	1.9182e-09	1.8713e-09	-1.3966e-09
WH1384/Balilla	11.735	4.2574	7.3972	-2.7837	-1.8235	13.585	8.403	-8.992	9.755	-5.0983	-11.191	0.92384	16.058	-13.308	0.50998	-2.0431	3.3148	1.9774e-08	-2.2327e-09	-6.6663e-10	-1.5882e-09	-2.867e-10	1.217e-10	4.3743e-10	-3.933e-10	2.1556e-09	-9.9646e-10	-6.1129e-10	-1.8003e-10	5.6704e-10	-1.5413e-09	3.203e-09	1.555e-09	-1.6239e-09	-4.8791e-10	-2.635e-10	-8.4927e-10	4.3325e-10	2.8635e-10	-6.4519e-10	1.9192e-09	-1.234e-09	1.6983e-09	-6.2748e-10	-1.6152e-09	-2.0485e-09	-1.9374e-09	-5.1935e-10	2.756e-09
WH1384/C418	-14.531	-36.551	-7.6935	-14.158	1.3614	3.9778	2.2969	-4.9426	4.3224	-0.43284	3.0919	7.1555	12.153	-10.37	8.1782	-3.7323	0.95216	-2.8622e-09	-1.8311e-09	4.1413e-10	7.005e-10	1.0693e-10	1.4697e-09	1.4874e-09	-1.3522e-10	-9.5179e-10	-8.5901e-10	-3.6041e-10	1.0855e-09	-7.9853e-10	-1.2498e-09	-1.3101e-09	-6.9095e-10	8.5904e-10	-3.7698e-10	-1.2421e-09	-1.3863e-09	-1.81e-09	1.9443e-11	-2.383e-09	-8.3718e-10	-2.8509e-10	5.1641e-10	4.1471e-10	2.6498e-10	-2.1366e-09	-7.7132e-10	-2.5694e-10	-1.3896e-09
WH1384/JR2	-17.701	8.0816	-3.9829	11.471	21.511	6.6379	-5.1	-1.9199	4.4031	3.8902	-1.0201	13.527	15.564	-8.098	6.0357	-2.7185	1.959	-2.9939e-09	-1.4074e-09	-6.2448e-10	-3.5817e-10	-6.7709e-11	-5.3005e-10	-4.6639e-10	-5.6047e-10	-2.0961e-10	7.8633e-11	-3.3553e-10	1.446e-09	6.0309e-10	-7.917e-10	-1.8629e-10	-5.3145e-10	1.4916e-10	-2.5829e-10	4.3071e-10	6.5173e-11	4.3932e-10	1.7385e-11	1.5646e-11	6.0846e-10	1.7236e-10	-6.6434e-10	-8.3235e-10	3.2198e-10	-1.3141e-10	3.0519e-10	7.1864e-10	-1.2996e-10
WH1384/Liaoxing1	-11.962	10.9	4.0347	-19.556	3.7171	-4.5461	2.4039	-8.2197	-2.5637	5.6967	-14.066	13.315	3.3634	-12.35	8.9589	-3.7277	-0.76296	-2.9866e-09	-1.9285e-09	1.9167e-10	9.4193e-10	1.0379e-09	1.7222e-09	1.0759e-09	-1.4597e-09	-3.672e-10	2.0495e-09	-1.424e-10	8.7722e-10	1.4888e-10	-3.2676e-11	-5.4223e-10	1.0899e-09	1.6139e-10	-2.5858e-09	-1.6873e-09	2.1233e-11	7.624e-10	8.8065e-11	-1.808e-09	1.1005e-09	2.1385e-10	-1.6376e-09	1.1335e-09	-2.7319e-10	3.5505e-10	7.8601e-10	-7.2141e-10	6.0458e-10
WH1384/Mianhui725	10.301	0.7233	0.71172	1.5135	12.745	7.998	13.752	-14.158	-11.949	-0.48106	5.723	3.3032	6.0251	-11.61	10.346	-6.6965	-0.15021	-2.9038e-09	-1.8737e-09	-1.3363e-09	1.135e-09	-1.8948e-09	-3.9586e-10	-1.2709e-09	-2.3539e-10	-1.6486e-09	9.9876e-10	1.8924e-09	-3.338e-11	7.2786e-10	6.1606e-11	9.4102e-10	7.7117e-10	-1.9037e-09	-3.1458e-10	1.2822e-09	1.5815e-09	-4.2507e-09	2.5917e-09	1.0416e-09	2.3401e-09	-7.1526e-10	-5.5757e-10	-1.5883e-09	5.3136e-11	1.1975e-09	4.5081e-10	2.0986e-09	9.1408e-10
WH1384/Qianlijing	13.851	5.6497	10.069	-15.127	11.961	9.0403	7.7095	6.5335	10.455	-9.4513	2.0089	12.023	5.4712	-3.0785	14.578	-3.825	0.93953	-1.6269e-09	-1.5308e-09	3.1287e-10	5.4038e-10	-3.6196e-10	-2.5879e-11	-9.5301e-10	-4.611e-10	5.4928e-11	-2.021e-09	-2.9148e-10	-1.1996e-09	2.9985e-10	-5.4619e-10	2.8994e-09	1.7518e-10	3.215e-10	2.3406e-09	1.6509e-10	1.7121e-10	2.1708e-09	4.8501e-10	-6.024e-11	-1.5079e-09	3.4696e-10	6.4881e-10	7.6309e-10	-1.7986e-09	1.2904e-09	4.6143e-11	-6.2269e-10	-9.5584e-10
WH1384/R4115	-2.219	-9.7079	5.0468	-17.299	16.613	17.925	7.933	-4.5075	-6.514	6.685	-9.7604	5.434	13.269	3.5067	3.9473	-0.27955	1.4724	-2.189e-09	-1.8893e-09	-2.2235e-09	7.4411e-10	1.728e-09	-8.0924e-10	1.7918e-09	3.3522e-11	-1.8556e-09	-8.5957e-10	-3.0428e-09	-1.3109e-10	-1.5579e-09	4.7931e-10	-1.9648e-09	6.2401e-12	1.7465e-09	2.7681e-10	-1.5123e-09	-3.3818e-10	7.2469e-10	-1.3021e-09	8.5955e-10	8.4935e-10	-1.2187e-09	9.8798e-10	-7.5202e-10	2.0261e-09	-5.3832e-10	9.689e-12	1.615e-09	2.6015e-10
WH1384/R465	17.675	5.9329	2.0479	-16.185	3.7519	1.299	2.6932	8.5545	-7.4494	5.5453	5.3661	9.3291	18.76	-11.727	0.31137	-1.0999	-1.8615	-2.9033e-09	-1.867e-09	1.1815e-09	6.5888e-10	-5.1858e-10	-7.1015e-10	-1.3426e-10	1.6913e-09	-1.573e-09	1.2597e-09	1.5729e-09	-3.6081e-10	1.8003e-09	-1.3497e-11	1.1872e-09	-4.0683e-10	1.1893e-09	2.1842e-10	-1.3243e-09	1.3726e-09	-7.9926e-10	-5.5155e-10	2.6319e-09	-2.0629e-09	2.5767e-09	3.0426e-09	-1.5101e-10	-2.6179e-09	1.3543e-09	-9.262e-11	-6.7532e-10	-1.2491e-09
WH1384/WH1383	1.9705	3.8291	11.928	-22.55	21.501	5.6541	-1.1681	-13.164	10.203	9.7949	7.6237	0.72572	4.5687	-11.862	0.20425	-1.3353	-0.92638	-2.6387e-09	-1.6591e-09	-7.7393e-10	-1.9903e-09	-1.8703e-10	-1.2946e-09	4.3786e-10	7.4672e-10	1.3768e-09	-1.5364e-09	-4.0929e-10	-2.2629e-09	4.4623e-11	1.9819e-09	-1.6962e-09	-8.6029e-10	7.7392e-10	1.4761e-09	6.181e-10	-3.9182e-09	-1.1068e-10	1.7964e-10	2.0352e-09	-7.9227e-10	-1.8138e-09	-1.7885e-09	1.1623e-10	-2.3351e-10	-1.6103e-10	6.6647e-10	-1.6977e-09	-6.9599e-10
WH1384/WH1390	-10.797	13.497	-7.7232	-15.462	6.1829	6.0593	0.98187	-11.378	1.7979	-8.0432	0.84044	2.9806	16.291	-1.8647	6.5489	-3.4162	-11.78	-2.9721e-09	-1.9027e-09	-1.4135e-09	1.6632e-10	2.0839e-09	2.2444e-10	5.5675e-10	5.9938e-10	-1.0565e-09	-2.0887e-10	1.9437e-10	1.3882e-09	-1.1311e-09	-1.4101e-09	-2.4875e-09	1.558e-09	-1.7974e-09	-1.0939e-09	9.1823e-10	-2.4203e-10	2.1458e-09	1.427e-09	4.2877e-10	-2.0877e-11	-5.3396e-10	-2.5401e-09	-5.473e-10	3.8967e-10	1.1039e-09	2.2576e-09	-1.314e-09	-5.6071e-10
WH1384/WH1392	-8.4816	14.039	-5.283	-19.714	7.5384	-1.6958	5.6003	-12.037	-0.72236	-5.7714	5.5244	7.314	14.005	-2.1544	3.5647	-1.1956	12.309	-2.7372e-09	1.3709e-08	3.9353e-10	-1.588e-09	-4.5813e-10	5.7203e-10	-1.5169e-09	3.6613e-10	-5.0981e-10	-5.3893e-10	5.114e-10	-3.7937e-10	3.5146e-10	3.351e-10	-2.5157e-09	2.096e-09	3.8247e-10	-1.0219e-09	1.0185e-09	2.6606e-10	-1.0394e-10	-1.7907e-09	-3.3044e-10	4.618e-10	-2.585e-09	1.1429e-10	6.8314e-10	9.8615e-10	-1.6506e-10	-7.7043e-10	-9.6034e-10	8.2408e-10
WH1384/WH1394	-12.504	14.763	-17.255	-10.526	1.4876	9.8593	18.498	0.11098	8.0842	12.896	2.2798	2.4277	9.7684	-6.3061	8.5845	-2.106	0.17978	-2.9038e-09	-1.8393e-09	4.5347e-10	7.4515e-10	1.9481e-09	-3.6012e-11	1.6899e-09	-1.9801e-09	-4.4912e-10	3.8639e-10	4.2681e-10	2.5239e-09	-1.5218e-09	-4.8108e-10	-9.1084e-10	-1.1247e-09	-1.1353e-09	1.6617e-09	-9.3299e-10	3.4286e-10	-8.4429e-11	-1.2167e-09	-7.1938e-10	-4.7029e-10	1.3936e-09	-6.326e-10	2.4121e-10	2.0349e-09	1.5639e-09	-6.3568e-10	2.088e-09	3.0494e-09
WH1384/Wuyunjing8	-23.808	4.8908	28.032	-4.115	-5.5612	7.999	7.3259	-7.7748	0.61758	5.6237	7.0951	10.047	13.794	-3.574	7.3928	-1.3869	-0.39254	-2.7421e-09	1.3193e-08	1.9408e-09	2.1821e-10	1.0772e-09	7.4494e-10	-1.3927e-09	-1.4884e-09	2.9277e-09	1.2412e-09	1.5422e-09	-2.6561e-10	-1.1356e-10	2.2372e-10	1.1477e-09	-9.2567e-10	3.0667e-10	-1.1571e-09	2.0273e-10	9.0735e-10	-4.9171e-10	-1.6528e-11	1.9449e-10	-9.3894e-10	8.3498e-10	-2.8153e-10	2.1837e-09	-1.0345e-09	2.8642e-10	5.6981e-10	-1.0104e-09	-9.124e-10
WH1384/YB	13.88	1.2919	5.324	-7.3918	4.5375	-3.7085	-1.8669	-6.9366	4.3397	9.9498	-2.2403	-1.729	17.127	-0.5254	12.795	-11.509	2.2308	-2.8265e-09	-1.7967e-09	8.1044e-10	1.022e-09	-2.4171e-09	-1.0538e-09	1.9694e-09	2.9376e-09	9.9599e-10	-4.5744e-10	-5.8467e-10	-6.7792e-10	1.9988e-09	1.651e-09	2.1217e-09	-5.9137e-10	1.0921e-09	-1.0685e-10	2.0132e-09	7.7086e-10	1.1896e-09	-2.3547e-09	2.9506e-10	-2.0471e-10	1.6743e-09	-8.1575e-10	5.1919e-10	-5.9808e-10	3.4995e-10	-1.2636e-09	-2.3853e-10	1.4356e-09
WH1390/110080	-25.271	17.488	-7.752	-7.4821	-3.6958	7.8375	-13.955	3.4051	-5.7903	-13.788	0.38052	-15.465	1.3885	0.86594	2.6715	-1.4415	-9.3057	-2.2537e-09	-1.9718e-09	2.4463e-09	-4.2542e-10	-2.3177e-10	5.9788e-10	-7.4182e-10	-6.1014e-10	7.9316e-10	7.9379e-10	2.2307e-09	-1.7586e-09	1.2288e-09	2.2363e-10	1.9212e-09	5.397e-10	-1.1152e-09	2.3558e-13	-1.0761e-09	1.5648e-09	1.3314e-09	7.0787e-10	-1.399e-10	-5.1096e-10	1.2309e-09	3.0391e-10	-2.3517e-09	1.1874e-09	-9.7415e-10	1.5129e-09	-2.1336e-09	1.6239e-09
WH1390/610234	5.7289	7.9661	-11.485	0.15393	-2.5276	-4.7394	-6.7467	-9.7412	1.0211	-8.5365	0.65293	-5.0002	3.9153	5.9684	6.2399	15.295	-13.066	1.9004e-08	-2.2658e-09	-2.6297e-09	8.7833e-10	-2.8354e-09	1.0498e-09	-5.0117e-10	-1.3081e-09	3.001e-09	-1.8798e-09	-5.8189e-10	1.1471e-09	-4.641e-10	4.4984e-10	3.5539e-10	-5.0585e-10	1.0561e-09	-2.3291e-09	2.091e-09	3.7415e-10	-1.7064e-09	1.0612e-10	-1.9491e-10	1.4315e-09	1.7426e-09	1.8321e-09	1.1944e-09	1.1776e-10	-1.1802e-09	2.0291e-09	3.6058e-10	1.5366e-09
WH1390/9311K	6.0084	12.681	-18.784	-3.7193	-12.239	10.235	-12.691	-11.17	0.55967	-7.0435	3.6314	5.821	-1.2391	8.514	-3.7553	-4.5963	-11.921	-2.879e-09	-1.8406e-09	-9.1205e-10	2.2022e-10	-5.5251e-10	-4.2149e-10	-1.9839e-10	2.6825e-09	-1.0361e-10	2.1788e-09	1.8398e-09	1.3517e-09	-5.7571e-10	-1.0644e-10	3.176e-10	-1.8961e-09	4.2911e-10	6.1153e-10	-6.4492e-10	4.591e-10	-4.0066e-10	1.9011e-09	4.2836e-12	1.3145e-09	-2.3908e-09	9.8382e-10	1.3426e-10	-1.3173e-09	6.7563e-11	1.2196e-09	2.6557e-09	3.0507e-10
WH1390/Balilla	3.9535	10.376	-3.3835	4.8014	-8.7121	4.4922	2.7837	-7.9907	9.0108	-18.478	-11.002	-8.818	7.7568	-0.85051	-8.642	-0.14171	-10.222	1.9672e-08	-2.3804e-09	1.3826e-09	7.566e-10	-7.3164e-10	-2.8508e-10	6.2524e-10	-2.7289e-10	4.043e-10	-1.6554e-09	1.0581e-09	9.0502e-10	-2.5814e-09	1.162e-09	3.529e-10	-6.7271e-10	-4.7584e-10	4.467e-10	1.1673e-10	-4.6643e-10	-2.8006e-09	2.2212e-09	-2.6657e-09	1.1301e-09	2.957e-10	-4.0519e-10	-3.8094e-10	3.5189e-10	1.1748e-11	-2.0699e-09	-2.303e-09	4.2104e-10
WH1390/C418	-22.313	-30.432	-18.474	-6.5729	-5.5272	-5.1148	-3.3224	-3.9413	3.5782	-13.812	3.2807	-2.5863	3.8519	2.0868	-0.97379	-1.8309	-12.584	-2.8976e-09	-1.8556e-09	2.6366e-09	-8.0693e-11	-1.319e-09	-4.4053e-10	3.2669e-10	-1.7445e-09	1.0736e-10	2.8914e-10	-1.9135e-09	-2.1892e-09	7.65e-11	-1.2612e-09	3.3611e-10	1.1029e-09	2.3043e-10	4.811e-10	7.0928e-10	-1.7078e-09	-4.2876e-10	-3.915e-09	1.5014e-09	-9.5236e-10	1.5194e-09	8.8595e-10	-9.7354e-10	3.0579e-10	4.3784e-10	6.5812e-10	4.6476e-10	6.6381e-10
WH1390/JR2	-25.482	14.2	-14.764	19.056	14.622	-2.4547	-10.719	-0.91854	3.659	-9.4892	-0.83128	3.7848	7.2627	4.3593	-3.1163	-0.81708	-11.577	-3.0798e-09	-1.4991e-09	-1.7395e-10	-1.5639e-10	1.4585e-09	-6.9674e-10	6.9414e-10	5.7915e-10	6.6586e-10	1.1729e-09	-1.9836e-09	9.3032e-10	1.7904e-09	4.9977e-10	-8.8498e-10	-1.7e-09	1.0507e-09	9.9376e-10	-3.99e-10	1.6394e-09	2.2747e-10	3.7919e-10	-1.0945e-09	-1.3864e-09	-7.633e-10	-6.6534e-10	2.3693e-10	2.4626e-09	-2.527e-09	-4.0295e-09	3.5685e-10	-2.404e-10
WH1390/Liaoxing1	-19.744	17.018	-6.746	-11.971	-3.1716	-13.639	-3.2153	-7.2183	-3.3078	-7.6827	-13.877	3.5736	-4.9374	0.10761	-0.19315	-1.8262	-14.299	-3.0561e-09	-1.9688e-09	1.6247e-09	-9.1286e-10	1.329e-09	5.3458e-10	-6.5484e-13	1.3098e-10	-2.581e-09	2.353e-09	1.598e-09	1.7716e-10	1.0556e-09	1.2417e-09	-1.8963e-09	-6.2298e-10	-1.3364e-09	-3.9538e-10	-9.109e-10	1.6224e-09	-1.4973e-10	-1.1402e-09	-1.2069e-09	8.5496e-11	2.7698e-09	-5.2914e-11	4.811e-10	-4.355e-10	-2.4575e-10	5.3029e-10	-1.1564e-09	-2.5184e-09
WH1390/Mianhui725	2.5198	6.8415	-10.069	9.0985	5.856	-1.0946	8.1331	-13.156	-12.693	-13.86	5.9118	-6.4387	-2.2757	0.84759	1.1943	-4.7951	-13.687	-2.9346e-09	-1.9107e-09	-3.8865e-10	2.491e-10	-1.3346e-09	-1.4723e-09	-2.2186e-09	1.4841e-09	1.7638e-09	-2.2829e-09	-1.0461e-09	5.3706e-10	-2.7286e-09	-7.7103e-10	5.4009e-10	-1.428e-09	3.8576e-10	4.2499e-10	1.9964e-10	-1.51e-09	-2.2267e-09	-1.0519e-09	-1.3891e-10	1.87e-09	1.3105e-09	-1.3641e-10	-1.2079e-09	1.392e-09	6.3191e-10	-5.281e-10	-1.117e-10	-2.1367e-09
WH1390/R4115	-10.001	-3.5897	-5.7339	-9.7142	9.7245	8.8328	2.3137	-3.5061	-7.2581	-6.6944	-9.5716	-4.3079	4.9679	15.964	-5.2048	1.6219	-12.064	-2.2593e-09	-1.906e-09	1.2219e-11	-1.6443e-09	1.4854e-10	-7.4491e-10	1.4075e-10	-5.1057e-11	-2.6112e-10	-1.1186e-09	-6.8895e-10	-9.765e-10	-2.5831e-10	-2.3111e-09	-9.7826e-10	1.9937e-09	1.3049e-09	3.5693e-12	7.2609e-10	9.5617e-10	2.897e-10	2.6392e-11	6.7056e-10	-5.2079e-10	1.5623e-09	-6.1554e-10	3.5952e-10	-4.8945e-10	-3.5909e-10	-2.3778e-09	8.442e-10	-2.505e-09
WH1390/R465	9.8938	12.051	-8.7328	-8.5996	-3.1368	-7.7936	-2.9261	9.5559	-8.1935	-7.8341	5.5549	-0.41274	10.459	0.73044	-8.8406	0.80153	-15.398	-2.9336e-09	-1.8873e-09	-2.5225e-09	-9.0891e-10	-4.3263e-10	-1.6016e-09	4.086e-10	-3.3466e-10	8.1239e-10	2.1798e-09	3.3277e-10	-3.8339e-10	2.0293e-09	-1.4465e-10	2.1641e-09	1.9439e-09	-7.8973e-10	-1.5068e-09	-9.8618e-10	-1.5428e-09	-1.345e-09	-5.0467e-10	1.0206e-09	-1.8652e-09	6.2544e-11	-1.9201e-10	2.2565e-09	-1.6051e-09	-5.3639e-10	6.4892e-11	-2.6301e-10	2.0813e-09
WH1390/WH1383	-5.8112	9.9473	1.1473	-14.965	14.613	-3.4386	-6.7873	-12.162	9.4588	-3.5845	7.8125	-9.0162	-3.7321	0.59566	-8.9478	0.56614	-14.463	-2.685e-09	-1.6831e-09	-1.3024e-09	1.0091e-09	6.1647e-10	2.3501e-09	2.6167e-10	-1.1132e-09	-1.1355e-09	6.1682e-10	1.0711e-10	-4.0383e-10	1.3544e-10	1.3094e-09	-1.6261e-09	2.6967e-10	-1.2607e-10	9.5697e-10	1.423e-09	-3.3441e-09	-3.0621e-10	1.1847e-10	1.8944e-09	-1.7211e-09	-1.7078e-09	-2.8586e-09	-5.4167e-11	1.0958e-09	7.4638e-10	1.003e-09	-3.8424e-10	-3.9971e-10
WH1390/WH1384	-10.797	13.497	-7.7232	-15.462	6.1829	6.0593	0.98187	-11.378	1.7979	-8.0432	0.84044	2.9806	16.291	-1.8647	6.5489	-3.4162	-11.78	-2.9721e-09	-1.9027e-09	-1.4135e-09	1.6632e-10	2.0839e-09	2.2444e-10	5.5675e-10	5.9938e-10	-1.0565e-09	-2.0887e-10	1.9437e-10	1.3882e-09	-1.1311e-09	-1.4101e-09	-2.4875e-09	1.558e-09	-1.7974e-09	-1.0939e-09	9.1823e-10	-2.4203e-10	2.1458e-09	1.427e-09	4.2877e-10	-2.0877e-11	-5.3396e-10	-2.5401e-09	-5.473e-10	3.8967e-10	1.1039e-09	2.2576e-09	-1.314e-09	-5.6071e-10
WH1390/WH1392	-16.263	20.157	-16.064	-12.129	0.64976	-10.788	-0.018939	-11.036	-1.4665	-19.151	5.7132	-2.4278	5.7043	10.303	-5.5873	0.70579	-1.2273	-2.7853e-09	1.363e-08	2.9054e-09	1.8801e-10	8.3953e-10	-2.8766e-10	1.2389e-09	6.2285e-11	-2.9058e-10	-6.5839e-10	-2.9376e-10	-2.3574e-10	6.2153e-10	5.91e-10	-7.3284e-10	-3.8799e-10	-1.8228e-09	-5.4546e-10	1.8014e-09	1.6839e-09	1.8639e-09	-2.9118e-10	4.6133e-10	1.1635e-09	-4.2808e-09	1.3245e-09	-5.7789e-10	-2.2082e-09	1.3399e-10	-1.1988e-10	1.8341e-09	6.9171e-10
WH1390/Wuyunjing8	-31.59	11.009	17.251	3.47	-12.45	-1.0937	1.7066	-6.7735	-0.12655	-7.7557	7.2839	0.30527	5.4928	8.8832	-1.7592	0.51453	-13.929	-2.7432e-09	1.3124e-08	1.2908e-10	4.306e-10	1.6865e-09	2.5648e-10	6.3582e-10	1.8085e-09	4.7746e-11	-1.0742e-09	-2.4412e-10	-1.061e-09	8.93e-10	3.2186e-10	-2.1183e-10	-3.9149e-10	-9.5265e-10	8.045e-10	-1.9626e-09	2.2874e-09	2.0579e-09	3.5938e-10	1.7145e-09	-1.2181e-09	-1.0752e-10	4.076e-10	6.5845e-10	-6.5881e-10	5.7077e-10	-1.8773e-09	1.1657e-09	1.7351e-09
WH1390/YB	6.0987	7.4101	-5.4567	0.19319	-2.3512	-12.801	-7.4862	-5.9353	3.5955	-3.4296	-2.0514	-11.471	8.8261	11.932	3.6425	-9.6079	-11.306	-2.8747e-09	-1.8802e-09	-1.5285e-09	5.0325e-10	-1.0597e-09	5.3221e-10	-1.1082e-09	-1.024e-09	-1.7902e-09	-4.9757e-10	-4.7291e-10	1.6273e-10	-5.4722e-10	9.2385e-10	2.4846e-09	1.7905e-10	3.9279e-09	9.7971e-10	-2.0602e-09	-1.3744e-09	1.0713e-09	-3.1109e-10	-2.6635e-09	1.2339e-09	-1.0488e-09	1.5674e-09	5.4334e-10	-3.234e-10	2.2156e-09	1.3218e-09	-6.3589e-10	-3.9627e-10
WH1392/110080	-22.955	18.03	-5.3117	-11.735	-2.3402	0.082376	-9.337	2.7455	-8.3106	-11.517	5.0645	-11.132	-0.89698	0.57627	-0.31273	0.77907	14.783	-1.9859e-09	1.3677e-08	2.3854e-09	-2.1054e-09	-9.9324e-10	-5.9395e-10	3.6577e-10	1.2919e-09	3.9545e-10	-7.7182e-10	3.9019e-10	2.4508e-09	-2.2319e-09	-4.5413e-10	8.5123e-10	-1.1839e-09	2.79e-10	-7.0295e-10	-1.1623e-10	4.82e-10	-1.0158e-09	-1.151e-09	1.2153e-09	4.9807e-10	1.4385e-09	-1.5706e-09	3.9175e-10	-1.6244e-09	-1.6938e-09	-5.8814e-11	7.5432e-10	5.94e-10
WH1392/610234	8.0443	8.5078	-9.0445	-4.0987	-1.1721	-12.494	-2.1283	-10.401	-1.4992	-6.2648	5.3369	-0.66668	1.6299	5.6787	3.2557	17.516	11.022	1.9218e-08	1.3352e-08	-1.6631e-10	6.6939e-10	-6.6859e-10	1.2719e-09	4.5349e-09	-3.8397e-10	1.264e-09	-5.9389e-10	-1.4568e-09	-5.704e-10	8.4196e-10	-2.9984e-09	-3.2428e-10	-2.1935e-09	4.1635e-10	1.3411e-09	-2.3312e-09	-5.5582e-10	-1.2005e-09	1.1006e-09	-9.0806e-10	-8.7448e-10	1.2232e-09	8.6175e-10	-1.4301e-09	9.6826e-10	3.0499e-09	-1.0491e-09	9.3305e-10	1.5276e-10
WH1392/9311K	8.3238	13.223	-16.344	-7.9719	-10.884	2.4802	-8.073	-11.829	-1.9606	-4.7717	8.3153	10.154	-3.5245	8.2243	-6.7395	-2.3757	12.168	-2.6407e-09	1.3683e-08	-7.2883e-10	5.6997e-10	-1.037e-09	5.8409e-10	6.0554e-10	2.1108e-10	-7.2456e-10	5.2233e-10	-6.0343e-10	1.4374e-10	-1.0271e-09	6.3176e-10	-6.1257e-10	-9.1844e-10	-1.492e-09	2.2914e-09	1.1055e-09	1.42e-09	1.0549e-09	-6.5553e-10	-1.794e-09	-1.9551e-09	-9.1161e-10	1.1758e-10	9.7758e-10	7.2825e-10	8.6688e-10	-7.7662e-10	-3.4671e-12	-3.264e-09
WH1392/Balilla	6.269	10.917	-0.94332	0.54879	-7.3566	-3.2629	7.4021	-8.6502	6.4905	-16.206	-6.3185	-4.4846	5.4713	-1.1402	-11.626	2.0789	13.867	1.9906e-08	1.3259e-08	8.0568e-11	1.9011e-09	-7.2107e-10	-1.0847e-09	2.4821e-09	-7.9012e-10	1.7404e-09	1.0294e-09	-1.3194e-09	1.0005e-09	-2.643e-10	1.8843e-09	-1.9746e-10	-2.2316e-10	-1.9124e-09	2.0226e-10	-2.2637e-11	-1.6641e-09	2.5505e-09	5.6673e-11	1.3092e-09	9.6437e-10	1.4223e-09	8.1705e-10	-5.1043e-10	7.2622e-10	-6.243e-10	7.9738e-10	-1.1776e-09	1.4122e-09
WH1392/C418	-19.997	-29.891	-16.034	-10.825	-4.1717	-12.87	1.296	-4.6008	1.0579	-11.54	7.9647	1.7471	1.5665	1.7972	-3.958	0.3897	11.505	-2.6222e-09	1.3717e-08	1.1721e-09	-3.0611e-10	1.4184e-10	-1.865e-09	-2.9329e-09	8.1832e-10	2.9911e-10	6.5715e-10	-8.7634e-10	-1.6647e-10	-6.2359e-10	-1.2607e-09	1.4613e-09	8.7179e-10	9.3652e-10	7.2046e-10	1.845e-09	-1.2894e-09	-1.1435e-09	5.347e-10	-1.7708e-09	-3.2766e-10	3.8729e-10	-6.195e-10	8.0986e-10	-1.2653e-09	6.6845e-10	1.5156e-09	3.3698e-09	1.1694e-09
WH1392/JR2	-23.167	14.741	-12.323	14.803	15.978	-10.21	-6.1008	-1.5781	1.1387	-7.2174	3.8527	8.1183	4.9773	4.0696	-6.1005	1.4035	12.511	-2.8178e-09	1.4113e-08	-2.1028e-10	5.3421e-11	1.2165e-09	8.1848e-10	-2.1391e-09	-8.2634e-10	-5.6418e-10	-1.4776e-09	5.4836e-10	3.4665e-10	-1.2374e-09	-4.1752e-11	4.7054e-10	-1.2945e-09	9.1546e-10	7.5327e-10	-1.0294e-09	2.5189e-11	2.3731e-09	-1.069e-09	7.4346e-10	1.4657e-09	1.7731e-09	-1.0781e-09	1.2805e-09	-2.9455e-11	-1.5858e-09	-1.2318e-09	-1.5819e-09	1.2092e-09
WH1392/Liaoxing1	-17.429	17.56	-4.3058	-16.224	-1.816	-21.394	1.4031	-7.8779	-5.8281	-5.4109	-9.1931	7.907	-7.2229	-0.18206	-3.1774	0.39434	9.7896	-2.8146e-09	1.363e-08	-4.5771e-10	-2.8542e-09	1.9584e-09	4.4191e-10	2.0652e-10	-7.853e-11	-6.5909e-10	-9.7344e-10	1.9757e-09	-1.1115e-09	-2.088e-11	-1.503e-10	7.3014e-10	-5.3737e-10	6.3717e-10	-4.8173e-09	1.9461e-10	3.9832e-10	1.1702e-09	1.0028e-10	-1.7109e-09	-8.8433e-10	6.0893e-10	-3.1807e-09	-5.5575e-10	-2.0217e-09	-6.8361e-10	-1.7204e-09	-8.1717e-10	-3.6755e-10
WH1392/Mianhui725	4.8353	7.3832	-7.6288	4.846	7.2115	-8.8497	12.752	-13.816	-15.214	-11.589	10.596	-2.1052	-4.5612	0.55792	-1.79	-2.5745	10.402	-2.7519e-09	1.3691e-08	-2.4854e-09	3.6216e-09	-4.7493e-10	1.4598e-09	-1.6471e-10	-1.7242e-09	-1.1054e-10	-8.0005e-13	1.0646e-10	1.1551e-09	1.3546e-09	2.0838e-09	1.0137e-09	-8.1837e-10	6.8049e-10	1.1304e-10	-3.8357e-10	-8.297e-10	-1.0189e-09	-1.7199e-09	1.8552e-10	-1.9251e-09	-8.9341e-10	1.3721e-09	-1.4713e-10	8.854e-10	1.3604e-09	8.3901e-10	9.3082e-10	-7.5796e-11
WH1392/Qianlijing	8.3852	12.31	1.7286	-11.794	6.4276	-7.8074	6.7087	6.8753	7.1902	-20.559	6.8817	6.6144	-5.1151	9.089	2.4422	0.29703	11.492	-1.4557e-09	1.4005e-08	-5.5256e-10	-6.3205e-10	3.5761e-11	-6.4911e-11	1.5372e-10	3.4111e-10	3.8957e-10	-1.6656e-11	1.57e-09	7.1951e-11	1.3767e-10	-5.5642e-10	4.9297e-10	-6.1726e-10	2.6117e-10	4.994e-10	1.737e-10	-7.6249e-10	-7.7593e-10	1.7107e-10	8.2953e-10	4.2584e-10	-4.6246e-10	2.9639e-10	-2.6193e-10	1.4663e-10	-1.5048e-10	4.6618e-10	-3.2309e-10	4.4324e-10
WH1392/R4115	-7.6852	-3.048	-3.2936	-13.967	11.08	1.0777	6.9322	-4.1657	-9.7784	-4.4226	-4.8876	0.025556	2.6824	15.674	-8.189	3.8425	12.025	-2.0118e-09	1.3645e-08	-8.6488e-10	-1.1063e-09	1.4896e-09	-6.4858e-10	-2.0369e-09	-2.5719e-10	6.6711e-10	-3.2477e-10	1.706e-09	1.3245e-09	3.723e-09	-9.5249e-10	-1.1299e-09	2.6097e-09	1.8899e-09	-5.9162e-10	1.722e-09	-2.2187e-10	-1.6319e-09	5.2639e-10	2.2382e-09	-6.0276e-10	-3.8775e-10	-7.8972e-10	-8.8535e-10	1.0028e-10	-2.2883e-10	3.1976e-09	-4.8527e-10	-7.2482e-10
WH1392/R465	12.209	12.593	-6.2926	-12.852	-1.7813	-15.549	1.6924	8.8963	-10.714	-5.5623	10.239	3.9207	8.1739	0.44077	-11.825	3.0221	8.691	-2.7404e-09	1.3661e-08	-2.0317e-09	2.6373e-10	-5.3401e-10	-2.0772e-10	2.4168e-10	-1.8005e-10	-6.6724e-10	-3.1287e-10	2.7628e-10	-2.1405e-09	-1.5681e-09	1.093e-09	-7.8171e-10	3.459e-10	1.3536e-09	3.4957e-10	-2.6621e-09	8.5673e-10	-8.7075e-10	-1.4343e-10	7.0783e-10	1.2418e-09	2.1011e-09	-1.4651e-10	8.1471e-10	2.03e-09	8.2292e-11	1.6963e-10	1.4891e-09	-7.2183e-11
WH1392/WH1384	-8.4816	14.039	-5.283	-19.714	7.5384	-1.6958	5.6003	-12.037	-0.72236	-5.7714	5.5244	7.314	14.005	-2.1544	3.5647	-1.1956	12.309	-2.7372e-09	1.3709e-08	3.9353e-10	-1.588e-09	-4.5813e-10	5.7203e-10	-1.5169e-09	3.6613e-10	-5.0981e-10	-5.3893e-10	5.114e-10	-3.7937e-10	3.5146e-10	3.351e-10	-2.5157e-09	2.096e-09	3.8247e-10	-1.0219e-09	1.0185e-09	2.6606e-10	-1.0394e-10	-1.7907e-09	-3.3044e-10	4.618e-10	-2.585e-09	1.1429e-10	6.8314e-10	9.8615e-10	-1.6506e-10	-7.7043e-10	-9.6034e-10	8.2408e-10
WH1392/WH1390	-16.263	20.157	-16.064	-12.129	0.64976	-10.788	-0.018939	-11.036	-1.4665	-19.151	5.7132	-2.4278	5.7043	10.303	-5.5873	0.70579	-1.2273	-2.7853e-09	1.363e-08	2.9054e-09	1.8801e-10	8.3953e-10	-2.8766e-10	1.2389e-09	6.2285e-11	-2.9058e-10	-6.5839e-10	-2.9376e-10	-2.3574e-10	6.2153e-10	5.91e-10	-7.3284e-10	-3.8799e-10	-1.8228e-09	-5.4546e-10	1.8014e-09	1.6839e-09	1.8639e-09	-2.9118e-10	4.6133e-10	1.1635e-09	-4.2808e-09	1.3245e-09	-5.7789e-10	-2.2082e-09	1.3399e-10	-1.1988e-10	1.8341e-09	6.9171e-10
WH1392/WH1394	-17.97	21.423	-25.595	-7.1937	-4.0456	-6.9884	17.497	0.45279	4.8198	1.7886	7.1526	-2.9807	-0.81783	5.8615	-3.5517	2.016	10.732	-2.7241e-09	1.366e-08	1.4453e-09	2.5308e-09	6.7837e-10	-1.118e-10	-2.2383e-09	1.0166e-09	-8.8565e-10	1.8651e-09	1.6079e-09	-9.8795e-10	-1.3743e-09	-6.2614e-10	1.7108e-09	1.2568e-09	6.7053e-10	1.3409e-09	-1.1818e-09	7.4409e-10	6.8498e-10	1.3314e-09	-3.6259e-10	-8.0536e-10	-3.8138e-10	3.5407e-10	-2.8933e-09	-5.5734e-10	-5.539e-10	-2.4075e-09	-2.3323e-09	-1.113e-09
WH1392/Wuyunjing8	-29.274	11.551	19.692	-0.78259	-11.094	-8.8488	6.3251	-7.433	-2.6469	-5.4839	11.968	4.6387	3.2074	8.5935	-4.7435	2.7351	10.16	-5.8685e-09	-2.0512e-07	4.4166e-14	-1.7548e-12	-4.8471e-12	-7.9936e-13	1.9574e-12	-3.5724e-12	-1.527e-12	1.7587e-12	7.0291e-13	-5.0584e-13	1.079e-12	-1.8529e-12	8.1815e-13	-1.5899e-12	-1.7791e-12	-4.5934e-14	2.2192e-12	-2.7411e-12	3.5543e-13	-1.7573e-12	5.2892e-13	5.6169e-12	1.7779e-12	2.5837e-12	-2.3865e-12	6.1808e-13	-3.1062e-12	1.3788e-12	2.264e-13	-1.2475e-12
WH1392/YB	8.4142	7.9518	-3.0165	-4.0594	-0.99567	-20.556	-2.8677	-6.5948	1.0752	-1.1578	2.6325	-7.1374	6.5406	11.642	0.65829	-7.3873	12.783	-2.668e-09	1.3771e-08	-1.3225e-09	-1.3972e-09	-1.5525e-09	-2.2667e-10	9.0245e-10	1.1592e-10	-4.024e-10	1.6565e-09	-3.3676e-09	-9.1768e-10	1.61e-09	-1.9151e-10	-1.2502e-10	9.2736e-10	-3.6392e-09	5.5629e-10	-5.8068e-10	-1.0548e-09	-2.1861e-09	3.2514e-09	-4.7289e-10	1.1365e-09	6.9391e-10	2.0198e-09	1.862e-09	1.0701e-09	-8.3552e-10	1.2597e-09	-1.596e-09	-5.0794e-10
WH1394/110080	-26.977	18.753	-17.284	-2.5463	-8.3911	11.638	3.5605	14.894	0.49596	7.151	1.8199	-16.018	-5.1336	-3.5754	4.7071	-0.1313	2.6539	-2.1855e-09	-1.8601e-09	4.6329e-10	-4.9457e-10	7.0228e-10	1.8045e-09	-3.4818e-10	-3.0952e-10	-4.0181e-10	-2.952e-10	-6.9143e-10	5.8096e-10	2.0829e-09	1.4452e-09	-2.0936e-09	5.1442e-11	-1.505e-10	5.4016e-11	6.2538e-10	-3.9306e-10	-1.3442e-09	2.2004e-10	1.1922e-10	1.3872e-09	1.937e-09	1.0786e-09	-1.3342e-09	-7.4777e-10	-1.904e-09	1.1705e-09	2.9001e-09	8.3999e-10
WH1394/610234	4.022	9.2316	-21.016	5.0897	-7.223	-0.93932	10.769	1.7475	7.3074	12.403	2.0923	-5.553	-2.6067	1.527	8.2755	16.606	-1.1069	1.9079e-08	-2.221e-09	4.8459e-10	-2.292e-09	-1.9581e-09	7.589e-10	-9.2781e-10	-2.1564e-09	-5.4035e-10	6.3785e-10	-1.2826e-09	-1.5331e-09	2.5025e-09	-1.7488e-09	1.3097e-09	8.1171e-10	1.0016e-09	-7.2088e-10	8.2243e-10	-2.5441e-10	1.4658e-09	1.088e-09	1.8069e-10	-9.7568e-10	-1.2213e-09	-1.6522e-09	1.4214e-09	8.2329e-10	-4.1685e-10	-1.4457e-09	-3.7837e-10	-1.4063e-09
WH1394/9311K	4.3015	13.946	-28.316	1.2164	-16.935	14.035	4.8245	0.31876	6.846	13.896	5.0707	5.2682	-7.7612	4.0726	-1.7197	-3.2861	0.038756	-2.8206e-09	-1.8249e-09	-9.4023e-10	-7.9812e-10	-2.0498e-09	-1.4143e-09	-1.9292e-09	1.4301e-10	-6.4839e-10	2.1503e-10	5.8224e-10	-6.3288e-10	-3.7429e-09	-1.9885e-09	-1.1445e-09	-9.2602e-12	-2.0457e-10	1.5284e-10	-7.6563e-12	-7.3858e-10	-4.472e-10	1.3657e-09	3.7625e-10	-1.5904e-09	-1.0897e-09	8.4766e-10	1.7482e-09	-1.6744e-09	-1.534e-09	-1.6958e-09	1.8262e-10	5.3363e-10
WH1394/Balilla	2.2466	11.641	-12.915	9.7371	-13.407	8.2923	20.3	3.498	15.297	2.4618	-9.5631	-9.3709	1.2347	-5.2919	-6.6064	1.1685	1.738	1.9709e-08	-2.3824e-09	-3.8947e-10	1.0772e-09	9.5648e-10	-1.2955e-09	3.2818e-09	-5.6295e-12	5.1402e-10	1.9534e-10	-5.8857e-10	-3.0569e-09	3.5411e-10	1.8609e-10	-1.2308e-09	1.5345e-09	7.0296e-10	3.8613e-12	2.5439e-10	2.4984e-10	-1.1011e-09	3.0614e-09	2.4223e-09	-3.3846e-10	-2.4614e-09	-1.3266e-09	8.5837e-10	-5.7386e-10	-1.6983e-09	-5.437e-10	2.958e-10	1.3318e-09
WH1394/C418	-24.019	-29.167	-28.006	-1.6371	-10.223	-1.3147	14.194	7.5474	9.8645	7.1272	4.7201	-3.1392	-2.6702	-2.3545	1.0619	-0.52067	-0.62465	-2.8503e-09	-1.8192e-09	1.379e-09	2.2553e-10	1.1614e-09	-8.4276e-10	1.5977e-09	-2.2682e-09	-5.0621e-10	-2.2846e-09	6.5902e-12	-1.5784e-09	1.5226e-09	5.6723e-10	1.4544e-09	-2.875e-09	5.4451e-10	-6.3815e-10	1.2669e-09	-2.2126e-09	1.7006e-09	3.2168e-10	-1.2576e-09	1.5416e-09	1.277e-09	-7.4288e-10	2.8261e-10	7.0575e-10	8.3997e-10	1.3042e-09	-2.1887e-11	-8.0895e-10
WH1394/JR2	-27.189	15.465	-24.295	23.992	9.927	1.3454	6.7967	10.57	9.9453	11.45	0.60806	3.232	0.74064	-0.082112	-1.0807	0.49314	0.38215	-3.0509e-09	-1.4213e-09	3.1277e-10	3.1497e-09	-1.6149e-09	9.633e-10	-7.505e-11	5.9089e-10	-1.2094e-10	-1.1029e-09	3.1094e-10	1.5854e-09	2.3583e-09	3.4462e-10	-2.295e-10	-1.686e-10	-1.047e-09	4.7996e-10	-8.6531e-10	4.2176e-11	1.079e-09	-2.2196e-09	-2.2588e-09	1.989e-09	6.7507e-10	-1.5596e-09	-7.3185e-10	2.8451e-10	-2.4181e-10	1.3417e-09	-1.9271e-12	-4.7872e-10
WH1394/Liaoxing1	-21.451	18.283	-16.278	-7.0353	-7.8669	-9.8387	14.301	4.2704	2.9785	13.257	-12.438	3.0208	-11.46	-4.3338	1.8425	-0.51603	-2.3398	-2.9921e-09	-1.9158e-09	9.438e-10	5.0936e-10	1.0357e-10	1.2088e-09	-1.245e-09	1.4766e-09	-7.5794e-10	-9.6703e-10	-2.4444e-10	-4.4339e-10	1.63e-09	1.2764e-09	-1.3319e-09	2.9279e-09	2.2092e-10	1.0807e-09	1.2821e-09	1.6275e-10	-1.3016e-09	-1.1157e-10	-1.7382e-10	2.6192e-10	1.9221e-09	1.0439e-09	3.6944e-10	1.8355e-09	3.5652e-09	-9.3327e-11	6.8038e-10	-6.0843e-10
WH1394/Mianhui725	0.81296	8.1069	-19.601	14.034	1.1606	2.7055	25.649	-1.6678	-6.4069	7.079	7.3511	-6.9915	-8.7978	-3.5938	3.2299	-3.4849	-1.727	-2.8933e-09	-1.8596e-09	-2.3196e-10	-1.6633e-09	-1.2695e-09	-1.9728e-09	9.7066e-10	2.3889e-09	-1.2827e-09	4.2811e-10	-1.828e-09	1.1653e-09	-9.5553e-10	-2.4921e-09	1.4186e-10	-2.4862e-09	-1.812e-09	1.1401e-10	-1.8606e-09	-4.2542e-10	4.8344e-10	2.9789e-11	-1.3815e-10	-7.0992e-10	-7.8801e-11	-3.7934e-09	2.2454e-09	-7.1473e-10	-8.4133e-10	1.8615e-09	-1.6661e-09	-3.9654e-10
WH1394/Qianlijing	4.3629	13.033	-10.243	-2.6061	0.37671	3.7478	19.606	19.024	15.997	-1.8912	3.637	1.7281	-9.3517	4.9373	7.4621	-0.61334	-0.63728	-1.6351e-09	-1.5377e-09	-1.3523e-09	-2.7652e-09	-2.2426e-11	1.0666e-09	-8.2269e-10	-2.327e-09	1.0903e-09	5.0141e-11	-5.6337e-12	1.5996e-09	-1.6239e-09	1.5366e-09	7.7228e-10	8.0361e-10	1.2465e-09	-8.043e-10	-4.381e-10	-9.513e-10	-3.2277e-10	-1.981e-09	6.7822e-10	4.0489e-10	-1.5645e-09	3.7691e-09	-2.1709e-10	4.5101e-10	1.1516e-09	-9.3292e-10	-1.2612e-09	1.3664e-09
WH1394/R4115	-11.708	-2.3243	-15.266	-4.7785	5.0292	12.633	19.83	7.9826	-0.97181	14.245	-8.1322	-4.8607	-1.5542	11.523	-3.1691	2.9321	-0.10443	-2.2203e-09	-1.9019e-09	1.2177e-10	7.8806e-10	9.1185e-10	-7.7199e-10	2.3938e-09	-1.1849e-10	1.1472e-09	-2.8067e-10	-1.0781e-09	-2.7765e-10	-5.1805e-10	9.6112e-10	8.1741e-10	-1.9969e-09	-5.787e-10	-7.1834e-10	1.433e-09	1.2496e-09	-1.9887e-09	1.1877e-09	1.1299e-09	2.3646e-10	2.2601e-09	-1.0219e-09	-5.3304e-10	-2.4296e-09	2.117e-09	7.8215e-10	-2.8193e-10	-5.9325e-10
WH1394/R465	8.187	13.317	-18.265	-3.6639	-7.8321	-3.9935	14.59	21.045	-1.9072	13.105	6.9942	-0.96556	3.9372	-3.7109	-6.805	2.1118	-3.4383	-2.8937e-09	-1.8822e-09	-1.5781e-09	-1.719e-09	-8.5148e-10	1.3961e-09	9.1978e-10	1.3573e-09	4.9002e-10	-5.0041e-10	1.7965e-09	2.1368e-09	-2.6019e-10	5.0659e-10	1.9833e-09	7.7842e-10	4.6596e-10	-1.6133e-09	2.1186e-09	2.3332e-09	1.7648e-09	4.4943e-10	-1.9194e-09	-5.6392e-11	2.4834e-10	2.0287e-10	2.9828e-11	1.5587e-09	-1.1242e-09	1.3442e-09	-1.2004e-09	-9.9062e-10
WH1394/WH1383	-7.5181	11.213	-8.3845	-10.029	9.9174	0.36152	10.729	-0.67374	15.745	17.355	9.2518	-9.569	-10.254	-3.8457	-6.9121	1.8764	-2.5032	-2.6092e-09	-1.6799e-09	-9.0962e-10	-4.4777e-10	2.4965e-09	1.4673e-09	-8.6798e-10	-1.5803e-09	1.1433e-09	5.264e-11	2.0141e-09	-8.9758e-10	-8.205e-10	4.2109e-10	-1.0699e-09	2.7377e-10	1.3445e-09	3.9977e-10	-9.3111e-10	-7.7187e-11	-1.6384e-09	-1.8698e-09	6.1138e-11	2.899e-10	-1.6828e-09	1.209e-09	6.002e-10	9.5618e-10	-1.0044e-09	-1.8064e-09	6.8794e-10	6.3035e-10
WH1394/WH1384	-12.504	14.763	-17.255	-10.526	1.4876	9.8593	18.498	0.11098	8.0842	12.896	2.2798	2.4277	9.7684	-6.3061	8.5845	-2.106	0.17978	-2.9038e-09	-1.8393e-09	4.5347e-10	7.4515e-10	1.9481e-09	-3.6012e-11	1.6899e-09	-1.9801e-09	-4.4912e-10	3.8639e-10	4.2681e-10	2.5239e-09	-1.5218e-09	-4.8108e-10	-9.1084e-10	-1.1247e-09	-1.1353e-09	1.6617e-09	-9.3299e-10	3.4286e-10	-8.4429e-11	-1.2167e-09	-7.1938e-10	-4.7029e-10	1.3936e-09	-6.326e-10	2.4121e-10	2.0349e-09	1.5639e-09	-6.3568e-10	2.088e-09	3.0494e-09
WH1394/WH1390	-20.286	20.881	-28.036	-2.9411	-5.4011	0.7667	12.879	1.1123	7.3401	-0.48313	2.4686	-7.3141	1.4676	6.1512	-0.56748	-0.20458	-13.357	-2.9429e-09	-1.975e-09	4.9426e-10	-4.3621e-10	8.6561e-10	1.1107e-10	-1.8467e-10	-5.1253e-10	-6.7849e-11	6.3597e-10	-2.7818e-10	4.2637e-11	3.0736e-10	-1.1398e-09	5.5875e-11	2.1482e-10	2.0979e-10	4.9643e-10	-2.3674e-10	-1.8686e-10	3.2057e-10	-1.4071e-10	2.137e-11	3.3772e-10	1.391e-09	4.5431e-11	-1.4323e-10	-5.9527e-10	6.7576e-11	5.0823e-10	5.9745e-10	-2.1011e-10
WH1394/WH1392	-17.97	21.423	-25.595	-7.1937	-4.0456	-6.9884	17.497	0.45279	4.8198	1.7886	7.1526	-2.9807	-0.81783	5.8615	-3.5517	2.016	10.732	-2.7241e-09	1.366e-08	1.4453e-09	2.5308e-09	6.7837e-10	-1.118e-10	-2.2383e-09	1.0166e-09	-8.8565e-10	1.8651e-09	1.6079e-09	-9.8795e-10	-1.3743e-09	-6.2614e-10	1.7108e-09	1.2568e-09	6.7053e-10	1.3409e-09	-1.1818e-09	7.4409e-10	6.8498e-10	1.3314e-09	-3.6259e-10	-8.0536e-10	-3.8138e-10	3.5407e-10	-2.8933e-09	-5.5734e-10	-5.539e-10	-2.4075e-09	-2.3323e-09	-1.113e-09
WH1394/Wuyunjing8	-33.297	12.274	7.7196	8.4057	-17.145	2.7064	19.223	4.7152	6.1597	13.184	8.7232	-0.24755	-1.0293	4.4418	0.27641	1.8248	-1.9694	-2.7124e-09	1.3228e-08	-8.7831e-10	1.5495e-09	-3.0817e-10	-1.0264e-09	-1.9682e-09	3.3379e-09	1.7765e-09	-9.0005e-10	4.2739e-10	-1.4429e-09	-1.4058e-09	1.7425e-09	-6.9738e-10	1.7188e-09	-2.2627e-09	-1.3214e-10	-2.542e-09	-8.5683e-10	1.1482e-09	1.0388e-09	1.1088e-09	-1.9579e-09	-5.3888e-10	1.6046e-09	4.5724e-10	-4.6175e-10	7.8289e-10	1.8551e-09	-5.529e-10	-8.1862e-10
WH1394/YB	4.3919	8.6755	-14.989	5.1289	-7.0465	-9.0011	10.03	5.5534	9.8818	17.51	-0.6121	-12.024	2.304	7.4905	5.6782	-8.2977	0.65402	-2.8253e-09	-1.7552e-09	4.2882e-10	-1.772e-10	-1.3171e-09	-1.2494e-09	-3.3897e-10	6.9084e-10	-5.3442e-10	2.1822e-09	-1.3147e-09	1.2375e-09	1.6189e-09	-1.0808e-09	4.9079e-10	-1.6037e-09	8.8836e-10	-9.0887e-10	1.0751e-09	8.7821e-10	-2.5882e-10	-2.625e-09	7.4243e-10	6.2456e-10	-1.39e-09	5.9662e-10	-2.4729e-09	-1.1928e-09	-7.357e-10	-3.5257e-10	5.6338e-10	-4.3217e-10
Wuyunjing8/110080	-38.282	8.8816	28.003	3.8648	-15.44	9.7772	-7.6114	7.008	-6.9707	-0.12157	6.6352	-8.3984	-1.1084	-0.84339	3.5154	0.58781	2.0816	-1.9731e-09	1.3188e-08	3.3608e-10	-2.0407e-09	5.6973e-10	1.4261e-09	2.5202e-09	3.1847e-10	2.0994e-10	1.1466e-09	-3.0594e-10	2.8979e-09	-1.6311e-09	-1.3191e-09	7.217e-10	2.341e-09	-4.5079e-10	6.1142e-10	3.9473e-10	2.0415e-09	-1.6036e-09	5.5159e-10	1.4051e-09	-3.3655e-10	-1.0892e-09	1.4221e-09	-1.515e-10	1.6293e-09	-2.6972e-11	-1.275e-09	-1.6288e-09	2.5299e-10
Wuyunjing8/610234	-7.2823	-0.6402	24.271	11.501	-14.272	-2.7997	-0.4027	-6.1383	-0.15926	5.1304	6.9076	2.0664	1.4185	4.2591	7.0838	17.325	-1.6792	1.9255e-08	1.2902e-08	1.3112e-09	1.6e-10	8.397e-10	-7.3959e-10	2.0166e-09	-1.7178e-09	1.4939e-10	-4.2937e-10	1.7223e-09	-1.2369e-09	-1.6003e-09	-1.5709e-09	1.7348e-10	-7.8881e-10	3.4725e-11	-2.7698e-09	-1.9791e-10	-1.7711e-10	-1.2522e-09	-1.0473e-09	-1.4173e-09	2.4608e-09	-1.8679e-09	-1.3326e-09	4.0303e-10	-2.9046e-10	3.6132e-10	1.0344e-09	-1.066e-10	7.5261e-10
Wuyunjing8/9311K	-7.0028	4.0747	16.971	7.6275	-23.983	12.175	-6.3475	-7.5671	-0.62069	6.6235	9.886	12.888	-3.736	6.8047	-2.9114	-2.5669	-0.53356	-2.6105e-09	1.3304e-08	2.2211e-10	5.7122e-10	-2.1837e-09	-8.6541e-10	2.278e-09	4.9004e-10	-6.0126e-10	6.3397e-10	2.244e-09	-3.4819e-09	1.3382e-09	5.4888e-10	-9.8922e-10	5.0993e-10	2.5961e-09	-1.2942e-09	2.5489e-09	-2.2142e-09	2.0958e-10	-1.8862e-09	-3.3979e-09	-2.6998e-09	-2.3357e-10	6.284e-10	-3.1224e-10	6.0512e-11	1.3111e-09	-1.7073e-10	-1.8702e-09	1.924e-09
Wuyunjing8/Balilla	-9.0577	1.7693	32.372	16.148	-20.456	6.4319	9.1277	-4.3878	7.8305	-4.8108	-4.7478	-1.7515	5.2599	-2.5598	-7.7981	1.8876	1.1657	2.0033e-08	1.2834e-08	5.5998e-10	1.3023e-09	-6.758e-10	4.8045e-10	-1.7857e-09	-1.0855e-09	-4.1903e-09	6.7231e-10	-6.2496e-10	-3.0391e-09	-1.0009e-09	1.2166e-09	-1.2166e-09	-1.1138e-09	-8.9634e-10	8.0271e-11	2.3028e-09	9.9783e-10	-4.4484e-10	-1.2449e-09	-1.1748e-10	-4.9785e-10	8.2736e-10	2.3259e-09	2.6768e-10	1.1305e-09	-1.1025e-09	2.4574e-09	-9.8337e-10	-8.4335e-10
Wuyunjing8/C418	-35.324	-39.039	17.281	4.774	-17.271	-3.1751	3.0216	-0.3384	2.3979	-0.14533	9.5354	4.4802	1.355	0.37753	-0.1299	0.19844	-1.197	-2.5947e-09	1.3262e-08	8.0671e-11	3.2039e-10	-1.776e-09	-5.2196e-10	8.0643e-10	2.844e-09	-9.1698e-10	-2.8765e-09	9.1516e-10	3.3685e-09	7.6188e-10	1.7879e-09	1.4019e-09	9.0673e-10	-1.3971e-09	-4.3004e-12	-9.9853e-10	-1.1061e-09	7.3132e-10	1.8238e-09	1.787e-09	8.0885e-10	-3.0546e-10	-6.1574e-11	7.6529e-10	3.7088e-10	1.1469e-09	-8.5966e-10	1.691e-09	2.8849e-10
Wuyunjing8/JR2	-38.493	5.5934	20.992	30.403	2.8782	-0.51501	-4.3752	2.6843	2.4786	4.1777	5.4234	10.851	4.7658	2.6499	-2.2724	1.2122	-0.19017	-2.8447e-09	1.366e-08	-8.901e-10	1.8502e-10	2.6441e-10	5.7278e-10	-2.9506e-10	4.7877e-10	5.3029e-10	-8.1993e-10	3.9589e-10	1.3372e-10	5.3768e-11	6.4923e-10	5.7144e-11	-3.3417e-10	8.3326e-10	-4.5553e-10	3.2232e-10	4.8529e-11	4.2458e-10	3.0855e-10	5.9085e-10	3.1516e-10	-8.0787e-11	-8.8795e-10	-7.2422e-10	7.1016e-11	-5.8528e-11	-2.2829e-10	1.4078e-10	8.4039e-10
Wuyunjing8/Liaoxing1	-32.755	8.4116	29.009	-0.6242	-14.916	-11.699	3.1287	-3.6155	-4.4882	5.9842	-7.6225	10.64	-7.4343	-1.6017	0.65074	0.20308	-2.9121	-2.795e-09	1.3128e-08	3.654e-10	-1.9387e-09	-2.2957e-09	1.5422e-09	-1.2157e-09	1.9202e-09	1.9088e-09	-6.0846e-10	-3.5423e-09	1.0053e-09	-7.6915e-10	-1.3969e-09	-1.0601e-09	-1.1538e-09	8.6157e-10	2.1293e-10	-1.6641e-09	-1.9436e-09	2.0181e-10	-1.2456e-09	1.8221e-09	-1.0454e-09	-1.4299e-10	-5.2039e-10	-1.8351e-09	-7.0782e-10	7.1828e-10	4.2402e-10	-1.0335e-09	3.9126e-10
Wuyunjing8/Mianhui725	-10.491	-1.7648	25.686	20.445	-5.8881	0.84508	14.477	-9.5536	-13.874	-0.19355	12.166	0.62788	-4.7726	-0.86174	2.0382	-2.7658	-2.2993	-2.6943e-09	1.3245e-08	-3.7095e-09	9.2234e-10	2.287e-09	-2.345e-09	-5.9538e-10	-1.0157e-09	-8.5208e-10	-9.2663e-10	-1.9396e-10	-1.2685e-09	-1.5168e-10	-2.4377e-10	2.4444e-09	1.4632e-09	9.3528e-10	1.9372e-10	2.2053e-09	-3.9133e-11	-2.1258e-10	-1.2225e-09	2.3346e-10	1.5391e-09	1.6478e-09	-3.4594e-10	-1.3291e-09	1.5788e-09	-1.9074e-09	-1.1807e-09	-1.0292e-09	1.7858e-09
Wuyunjing8/Qianlijing	-6.9414	3.1616	35.044	3.805	-6.6721	1.8874	8.4343	11.138	8.5301	-9.1638	8.4524	9.3475	-5.3265	7.6694	6.2703	0.10577	-1.2096	-1.398e-09	1.3557e-08	-3.0292e-10	-1.2061e-09	1.0824e-10	-3.3109e-10	1.8086e-09	1.3838e-09	4.9406e-10	6.6354e-10	-4.8767e-10	1.7193e-09	2.8927e-09	-1.8619e-09	-7.4817e-10	8.5688e-10	1.8923e-10	2.0863e-09	-2.5667e-09	3.1738e-09	-2.9123e-09	-2.372e-09	-4.3086e-10	1.517e-10	-3.2133e-10	-8.9064e-10	1.2311e-09	7.2389e-11	3.2184e-10	6.5413e-10	-1.5264e-10	-1.0859e-09
Wuyunjing8/R4115	-23.012	-12.196	30.021	1.6326	-2.0196	10.773	8.6577	0.096759	-8.4385	6.9725	-3.3169	2.7587	2.471	14.255	-4.3609	3.6512	-0.67674	-1.9776e-09	1.3208e-08	-1.2491e-09	1.4459e-09	-1.0521e-09	1.1271e-09	-3.3368e-10	-2.7988e-09	-1.3685e-09	-8.0359e-10	-5.7695e-10	3.3081e-09	-4.3222e-10	5.3775e-10	1.3126e-09	2.6351e-09	-7.4111e-10	-2.6298e-10	1.4478e-10	-2.374e-11	2.7893e-09	1.8811e-09	-3.8955e-11	-8.9824e-10	-1.2575e-09	-1.8722e-09	-1.6701e-09	-2.475e-10	1.8036e-09	-9.8079e-10	1.7069e-09	-8.6183e-10
Wuyunjing8/R465	-3.1174	3.4448	27.022	2.7472	-14.881	-5.8539	3.4179	13.159	-9.3739	5.8328	11.81	6.6538	7.9625	-0.97889	-7.9968	2.8309	-4.0106	-2.6846e-09	1.3337e-08	6.0743e-10	1.6916e-10	-1.3481e-10	3.4101e-11	2.1281e-09	-1.8546e-09	1.0587e-09	1.5382e-09	1.5843e-09	1.1888e-09	-4.9903e-10	-1.9666e-09	-8.0614e-10	-7.6555e-10	3.5551e-09	4.1108e-09	1.6177e-09	-4.1196e-10	1.5382e-09	4.0532e-10	8.6116e-10	1.9566e-09	1.9044e-09	-7.1566e-10	6.2065e-10	8.8582e-11	-3.167e-09	1.7219e-09	1.4418e-09	-1.5256e-09
Wuyunjing8/WH1383	-18.822	1.3409	36.903	-3.6181	2.8686	-1.4989	-0.44331	-8.5596	8.2784	10.082	14.067	-1.9496	-6.2289	-1.1137	-8.1039	2.5955	-3.0755	-2.4454e-09	1.3472e-08	9.5423e-10	-2.4876e-09	1.6386e-09	7.4027e-10	-2.4322e-09	-3.7274e-10	1.5036e-09	2.1146e-09	-2.5259e-09	4.0681e-10	8.1417e-10	1.9351e-09	-4.128e-10	-3.8141e-09	3.2647e-10	-1.0332e-09	1.347e-10	-2.4747e-10	-1.5895e-09	1.22e-09	-1.6306e-09	7.0301e-12	3.4474e-10	-4.7722e-10	-9.2236e-10	-5.0026e-10	-4.3334e-10	8.3605e-10	7.4411e-10	-8.6213e-10
Wuyunjing8/WH1384	-23.808	4.8908	28.032	-4.115	-5.5612	7.999	7.3259	-7.7748	0.61758	5.6237	7.0951	10.047	13.794	-3.574	7.3928	-1.3869	-0.39254	-2.7421e-09	1.3193e-08	1.9408e-09	2.1821e-10	1.0772e-09	7.4494e-10	-1.3927e-09	-1.4884e-09	2.9277e-09	1.2412e-09	1.5422e-09	-2.6561e-10	-1.1356e-10	2.2372e-10	1.1477e-09	-9.2567e-10	3.0667e-10	-1.1571e-09	2.0273e-10	9.0735e-10	-4.9171e-10	-1.6528e-11	1.9449e-10	-9.3894e-10	8.3498e-10	-2.8153e-10	2.1837e-09	-1.0345e-09	2.8642e-10	5.6981e-10	-1.0104e-09	-9.124e-10
Wuyunjing8/WH1390	-31.59	11.009	17.251	3.47	-12.45	-1.0937	1.7066	-6.7735	-0.12655	-7.7557	7.2839	0.30527	5.4928	8.8832	-1.7592	0.51453	-13.929	-2.7432e-09	1.3124e-08	1.2908e-10	4.306e-10	1.6865e-09	2.5648e-10	6.3582e-10	1.8085e-09	4.7746e-11	-1.0742e-09	-2.4412e-10	-1.061e-09	8.93e-10	3.2186e-10	-2.1183e-10	-3.9149e-10	-9.5265e-10	8.045e-10	-1.9626e-09	2.2874e-09	2.0579e-09	3.5938e-10	1.7145e-09	-1.2181e-09	-1.0752e-10	4.076e-10	6.5845e-10	-6.5881e-10	5.7077e-10	-1.8773e-09	1.1657e-09	1.7351e-09
Wuyunjing8/WH1392	-29.274	11.551	19.692	-0.78259	-11.094	-8.8488	6.3251	-7.433	-2.6469	-5.4839	11.968	4.6387	3.2074	8.5935	-4.7435	2.7351	10.16	-5.8685e-09	-2.0512e-07	4.4166e-14	-1.7548e-12	-4.8471e-12	-7.9936e-13	1.9574e-12	-3.5724e-12	-1.527e-12	1.7587e-12	7.0291e-13	-5.0584e-13	1.079e-12	-1.8529e-12	8.1815e-13	-1.5899e-12	-1.7791e-12	-4.5934e-14	2.2192e-12	-2.7411e-12	3.5543e-13	-1.7573e-12	5.2892e-13	5.6169e-12	1.7779e-12	2.5837e-12	-2.3865e-12	6.1808e-13	-3.1062e-12	1.3788e-12	2.264e-13	-1.2475e-12
Wuyunjing8/WH1394	-33.297	12.274	7.7196	8.4057	-17.145	2.7064	19.223	4.7152	6.1597	13.184	8.7232	-0.24755	-1.0293	4.4418	0.27641	1.8248	-1.9694	-2.7124e-09	1.3228e-08	-8.7831e-10	1.5495e-09	-3.0817e-10	-1.0264e-09	-1.9682e-09	3.3379e-09	1.7765e-09	-9.0005e-10	4.2739e-10	-1.4429e-09	-1.4058e-09	1.7425e-09	-6.9738e-10	1.7188e-09	-2.2627e-09	-1.3214e-10	-2.542e-09	-8.5683e-10	1.1482e-09	1.0388e-09	1.1088e-09	-1.9579e-09	-5.3888e-10	1.6046e-09	4.5724e-10	-4.6175e-10	7.8289e-10	1.8551e-09	-5.529e-10	-8.1862e-10
Wuyunjing8/YB	-6.9125	-1.1962	30.299	11.54	-14.095	-10.861	-1.1422	-2.3324	2.4152	10.237	4.2032	-4.4043	6.3292	10.223	4.4864	-7.5786	0.081699	-2.627e-09	1.3311e-08	7.795e-11	4.9283e-10	9.2137e-11	-8.0794e-10	-2.3247e-09	-2.0052e-09	-2.411e-09	1.6527e-11	-1.323e-10	-2.1652e-09	8.7594e-10	-2.7795e-10	-1.0888e-09	-1.3098e-09	-2.5194e-09	-1.2185e-09	2.1686e-10	-2.4092e-09	-3.8214e-10	1.6025e-09	-2.3895e-09	2.5056e-09	3.4359e-10	5.5059e-10	-2.3681e-12	-1.0659e-09	-6.3351e-10	-3.0959e-09	1.5476e-09	-6.3939e-10
YB/110080	-0.59318	5.2827	5.2952	0.58796	-5.3412	-1.9303	-16.804	7.8461	-3.2486	4.2045	-2.7002	-20.175	2.2248	2.2053	8.9171	-9.5346	4.7049	-2.1098e-09	-1.8434e-09	-4.1824e-09	1.6144e-09	-7.5554e-10	1.4474e-10	1.2587e-09	-9.6908e-10	2.353e-09	-6.736e-10	1.3932e-10	4.737e-10	9.7608e-10	1.4508e-09	-1.5494e-09	3.1117e-10	2.374e-09	-1.4008e-09	-1.1778e-09	1.9246e-10	-2.3297e-10	-1.0664e-10	-8.1678e-10	-1.9522e-09	-1.3361e-09	-2.0085e-09	-6.7075e-10	-3.8499e-10	4.2749e-10	-1.1478e-09	-2.4579e-09	-1.1353e-09
YB/610234	30.406	-4.2392	1.5625	8.224	-4.1731	-14.507	-9.5955	-5.3001	3.5628	9.4565	-2.4278	-9.7097	4.7517	7.3077	12.486	7.2023	0.94419	1.9121e-08	-2.193e-09	2.0753e-09	-2.9835e-10	8.5735e-10	-3.376e-09	-1.2791e-09	7.0657e-10	8.5957e-10	1.642e-09	2.8785e-09	1.5223e-09	-1.4609e-09	1.8791e-09	-1.5358e-09	1.0777e-09	1.3599e-09	1.0863e-09	-1.2587e-09	-2.7946e-10	2.0507e-09	5.1356e-10	-1.3381e-09	-1.0635e-09	-6.9463e-10	3.0711e-10	-1.6508e-09	1.3276e-09	-1.1261e-09	3.6482e-09	-3.6136e-11	-5.7199e-10
YB/9311K	30.686	0.47574	-5.7367	4.3507	-13.885	0.4675	-15.54	-6.7289	3.1014	10.95	0.55067	1.1114	-0.40273	9.8533	2.4903	-12.689	2.0898	-2.7484e-09	-1.7518e-09	4.4509e-10	7.6403e-10	2.1232e-09	-1.5309e-09	-2.1858e-10	-8.5131e-10	2.2822e-09	2.4881e-09	2.8534e-10	1.7094e-09	5.0424e-10	-7.5426e-10	-1.3394e-10	-6.5781e-10	-1.8144e-09	-6.9776e-10	9.1099e-10	-1.4278e-10	9.6328e-10	-4.5207e-11	1.209e-09	-4.6897e-10	2.0367e-09	5.5114e-10	-2.4975e-10	2.0687e-10	1.4182e-09	-2.5593e-09	-3.7779e-10	-6.4822e-11
YB/Balilla	28.631	-1.8297	9.6636	12.871	-10.358	-5.2756	-0.065077	-3.5496	11.553	-0.48467	-14.083	-13.528	8.5931	0.48881	-2.3964	-8.2348	3.789	1.985e-08	-2.2651e-09	-2.3087e-09	-2.6145e-09	2.8775e-09	-1.2919e-09	2.6215e-10	-7.9868e-10	6.2657e-10	-1.1197e-10	1.0627e-09	-1.7222e-10	-5.1155e-10	-3.6061e-10	-4.3377e-11	-2.4579e-09	-1.3675e-09	7.5717e-10	1.2586e-10	4.4934e-10	6.8661e-10	-1.1892e-09	2.4415e-09	5.4712e-11	9.5573e-10	1.6181e-09	-1.2397e-09	1.2885e-09	8.2336e-10	1.5216e-09	-4.3232e-11	-1.7778e-09
YB/C418	2.3648	-42.638	-5.427	1.4972	-7.1727	-14.883	-6.1712	0.49979	6.12	4.1808	0.20003	-7.2959	4.6883	3.4262	5.2718	-9.924	1.4264	-2.7275e-09	-1.7489e-09	-1.3365e-09	3.7003e-10	2.7467e-09	3.3629e-09	5.0137e-10	1.091e-09	8.7943e-10	1.9769e-09	-1.9836e-09	-4.0283e-10	-8.5573e-10	-1.1893e-09	-7.6026e-10	7.5679e-10	1.2146e-10	1.4863e-09	-3.0283e-10	-9.8321e-10	1.0628e-09	1.5377e-09	-1.7037e-10	8.8908e-10	9.5167e-10	-9.9522e-10	-7.392e-10	1.2411e-10	-2.6138e-10	3.4133e-10	4.3983e-10	1.1306e-09
YB/JR2	-0.8048	1.9945	-1.7164	27.126	12.977	-12.222	-13.568	3.5225	6.2007	8.5038	-3.912	-0.92473	8.0991	5.6986	3.1293	-8.9102	2.4332	-2.8742e-09	-1.3625e-09	-2.0657e-09	-2.5368e-09	-5.0448e-10	8.9467e-10	-9.2069e-10	-1.2525e-09	-9.8934e-10	4.7384e-10	2.3263e-09	-1.1066e-10	5.6702e-10	6.4378e-10	1.9802e-09	-1.3634e-09	-2.0381e-09	-1.5248e-10	-1.1693e-09	-5.2857e-10	-1.5483e-09	3.8843e-10	1.4062e-09	-1.4448e-09	-5.862e-11	-1.1109e-09	-1.7126e-09	1.424e-09	2.1725e-09	-3.9854e-10	-3.2186e-10	1.8253e-09
YB/Liaoxing1	4.9333	4.8127	6.3012	-3.901	-4.817	-23.407	-6.0641	-2.7773	-0.76611	10.31	-16.958	-1.136	-4.1011	1.4469	6.0525	-9.9194	-0.28873	-2.8975e-09	-1.8638e-09	1.8945e-10	2.2377e-10	-2.2451e-09	6.3551e-10	2.5308e-12	-9.3919e-10	6.533e-10	-3.4522e-09	-1.5863e-10	1.5119e-09	-1.9522e-09	9.6056e-10	-3.7457e-10	-8.8463e-10	-3.5746e-10	-6.345e-10	-1.0357e-09	-4.2761e-10	-7.5442e-10	1.8885e-09	-2.2857e-10	-1.2566e-09	-1.5956e-09	-4.2091e-10	3.01e-10	-1.375e-09	-9.8346e-10	1.7815e-09	1.1814e-09	-1.3566e-09
YB/Mianhui725	27.197	-5.3638	2.9782	17.169	4.2105	-10.862	5.2843	-8.7154	-10.151	4.1326	2.8311	-11.148	-1.4394	2.1869	7.4399	-12.888	0.32402	-2.8121e-09	-1.8294e-09	1.1041e-09	-3.1328e-09	3.1032e-10	1.8517e-09	-1.0769e-09	3.6587e-10	2.3506e-10	-2.3812e-09	3.4082e-09	2.3746e-09	1.5247e-09	1.4254e-10	-1.5451e-09	1.4281e-09	1.0511e-09	2.1336e-09	2.7477e-09	-2.8582e-10	1.5939e-09	7.6287e-10	-1.2903e-10	1.231e-09	1.878e-10	5.2655e-10	3.929e-09	3.0807e-10	1.1309e-09	-1.0718e-09	1.1917e-09	5.9307e-10
YB/Qianlijing	30.747	-0.43739	12.336	0.52824	3.4266	-9.8201	-0.7585	11.976	12.252	-4.8377	-0.88298	-2.4286	-1.9933	10.718	11.672	-10.017	1.4138	-1.5443e-09	-1.5469e-09	1.3635e-09	2.6354e-09	7.7904e-10	6.5827e-10	-1.7544e-09	-2.4611e-10	-1.2914e-09	4.8472e-10	-7.0163e-10	-2.6484e-09	-1.9791e-09	-1.3526e-09	-1.2617e-09	7.1508e-10	2.4706e-09	-1.1146e-09	-9.9625e-10	2.7197e-09	-7.6012e-10	1.454e-09	1.17e-09	-1.6149e-09	4.9773e-11	-8.4601e-10	-6.029e-10	8.6951e-10	7.7727e-10	-5.6993e-11	-3.3448e-10	2.8464e-09
YB/R4115	14.677	-15.795	7.3133	-1.6442	8.0791	-0.93496	-0.53505	0.93495	-4.7164	11.299	-12.652	-9.0175	5.8042	17.303	1.0409	-6.4712	1.9466	-2.0968e-09	-1.8426e-09	1.0073e-09	1.9562e-09	8.2851e-10	3.6064e-09	1.4507e-09	3.0272e-09	-3.5939e-10	2.9271e-10	8.4161e-11	-5.0534e-10	-1.2162e-09	2.3578e-09	-3.5647e-10	4.0892e-10	-5.8697e-10	9.7186e-10	-5.6943e-10	-8.986e-10	-1.9873e-09	-1.8034e-09	-9.7013e-10	9.201e-10	4.0212e-10	5.8992e-11	7.0226e-11	-2.6709e-09	-3.0544e-09	-1.33e-09	2.4499e-10	3.1245e-10
YB/R465	34.571	-0.15416	4.3144	-0.52959	-4.7822	-17.561	-5.7749	13.997	-5.6518	10.159	2.4742	-5.1223	11.296	2.0698	-2.595	-7.2916	-1.3873	-2.8202e-09	-1.8286e-09	3.8785e-09	1.7723e-09	7.9014e-11	-9.4063e-10	-5.0036e-10	-1.2371e-09	-4.8235e-10	-1.8109e-09	-4.1552e-10	9.3939e-10	-1.0437e-09	-3.8384e-09	9.0733e-10	-9.03e-10	3.6622e-10	-3.3881e-11	1.4816e-09	1.0718e-09	-1.2917e-09	-1.8219e-09	-8.4932e-11	-1.2754e-09	-1.9165e-09	-1.514e-09	1.2616e-09	5.0426e-10	-7.7988e-10	-2.0346e-10	-2.8514e-10	1.3821e-09
YB/WH1383	18.866	-2.258	14.194	-6.8949	12.967	-13.206	-9.6361	-7.7214	12.001	14.408	4.7318	-13.726	-2.8957	1.935	-2.7021	-7.527	-0.45215	-2.5186e-09	-1.574e-09	1.3637e-09	-1.1974e-09	-8.4226e-10	-1.2091e-09	3.1747e-09	3.8833e-10	-6.2467e-10	-1.8286e-09	-1.053e-09	-2.3313e-09	-1.0899e-10	-9.6391e-10	7.8985e-10	3.9673e-09	-1.3285e-09	-1.7029e-09	5.7967e-10	2.302e-09	7.8368e-10	-1.1419e-09	1.9997e-09	6.8566e-10	7.4449e-10	-8.4983e-11	8.5458e-10	4.8807e-10	-9.0523e-10	1.6058e-09	1.1579e-09	-2.6433e-09
YB/WH1384	13.88	1.2919	5.324	-7.3918	4.5375	-3.7085	-1.8669	-6.9366	4.3397	9.9498	-2.2403	-1.729	17.127	-0.5254	12.795	-11.509	2.2308	-2.8265e-09	-1.7967e-09	8.1044e-10	1.022e-09	-2.4171e-09	-1.0538e-09	1.9694e-09	2.9376e-09	9.9599e-10	-4.5744e-10	-5.8467e-10	-6.7792e-10	1.9988e-09	1.651e-09	2.1217e-09	-5.9137e-10	1.0921e-09	-1.0685e-10	2.0132e-09	7.7086e-10	1.1896e-09	-2.3547e-09	2.9506e-10	-2.0471e-10	1.6743e-09	-8.1575e-10	5.1919e-10	-5.9808e-10	3.4995e-10	-1.2636e-09	-2.3853e-10	1.4356e-09
YB/WH1390	6.0987	7.4101	-5.4567	0.19319	-2.3512	-12.801	-7.4862	-5.9353	3.5955	-3.4296	-2.0514	-11.471	8.8261	11.932	3.6425	-9.6079	-11.306	-2.8747e-09	-1.8802e-09	-1.5285e-09	5.0325e-10	-1.0597e-09	5.3221e-10	-1.1082e-09	-1.024e-09	-1.7902e-09	-4.9757e-10	-4.7291e-10	1.6273e-10	-5.4722e-10	9.2385e-10	2.4846e-09	1.7905e-10	3.9279e-09	9.7971e-10	-2.0602e-09	-1.3744e-09	1.0713e-09	-3.1109e-10	-2.6635e-09	1.2339e-09	-1.0488e-09	1.5674e-09	5.4334e-10	-3.234e-10	2.2156e-09	1.3218e-09	-6.3589e-10	-3.9627e-10
YB/WH1392	8.4142	7.9518	-3.0165	-4.0594	-0.99567	-20.556	-2.8677	-6.5948	1.0752	-1.1578	2.6325	-7.1374	6.5406	11.642	0.65829	-7.3873	12.783	-2.668e-09	1.3771e-08	-1.3225e-09	-1.3972e-09	-1.5525e-09	-2.2667e-10	9.0245e-10	1.1592e-10	-4.024e-10	1.6565e-09	-3.3676e-09	-9.1768e-10	1.61e-09	-1.9151e-10	-1.2502e-10	9.2736e-10	-3.6392e-09	5.5629e-10	-5.8068e-10	-1.0548e-09	-2.1861e-09	3.2514e-09	-4.7289e-10	1.1365e-09	6.9391e-10	2.0198e-09	1.862e-09	1.0701e-09	-8.3552e-10	1.2597e-09	-1.596e-09	-5.0794e-10
YB/WH1394	4.3919	8.6755	-14.989	5.1289	-7.0465	-9.0011	10.03	5.5534	9.8818	17.51	-0.6121	-12.024	2.304	7.4905	5.6782	-8.2977	0.65402	-2.8253e-09	-1.7552e-09	4.2882e-10	-1.772e-10	-1.3171e-09	-1.2494e-09	-3.3897e-10	6.9084e-10	-5.3442e-10	2.1822e-09	-1.3147e-09	1.2375e-09	1.6189e-09	-1.0808e-09	4.9079e-10	-1.6037e-09	8.8836e-10	-9.0887e-10	1.0751e-09	8.7821e-10	-2.5882e-10	-2.625e-09	7.4243e-10	6.2456e-10	-1.39e-09	5.9662e-10	-2.4729e-09	-1.1928e-09	-7.357e-10	-3.5257e-10	5.6338e-10	-4.3217e-10
YB/Wuyunjing8	-6.9125	-1.1962	30.299	11.54	-14.095	-10.861	-1.1422	-2.3324	2.4152	10.237	4.2032	-4.4043	6.3292	10.223	4.4864	-7.5786	0.081699	-2.627e-09	1.3311e-08	7.795e-11	4.9283e-10	9.2137e-11	-8.0794e-10	-2.3247e-09	-2.0052e-09	-2.411e-09	1.6527e-11	-1.323e-10	-2.1652e-09	8.7594e-10	-2.7795e-10	-1.0888e-09	-1.3098e-09	-2.5194e-09	-1.2185e-09	2.1686e-10	-2.4092e-09	-3.8214e-10	1.6025e-09	-2.3895e-09	2.5056e-09	3.4359e-10	5.5059e-10	-2.3681e-12	-1.0659e-09	-6.3351e-10	-3.0959e-09	1.5476e-09	-6.3939e-10
[truncated: 206 more columns]
