# Supplementary material for: Metabolome-based prediction of yield heterosis contributes to the breeding of elite rice
Source: Life Sci Alliance. 2019 Dec 13;3(1):e201900551. doi: 10.26508/lsa.201900551 (PMC6918511; doi:10.26508/lsa.201900551)
Supplement: Supplementary file 14 [file LSA-2019-00551_TableS14.xls]

## Sheet: S Table 14 MSEA 2015
Table S14 Metabolite set enrichment analysis of differential analytes from Pop2015.
Pathway name	Pathway_Total	Hits	P value	P adjusted	Normalized enrichment score
Fructose and mannose metabolism	18	1	0.02	0.1292	1.488
Galactose metabolism	26	1	0.02	0.1292	1.682
Starch and sucrose metabolism	25	1	0.02	0.1292	1.488
Purine metabolism	55	3	0.02083	0.1292	2.102
Amino sugar and nucleotide sugar metabolism	37	3	0.02083	0.1292	1.898
Inositol phosphate metabolism	17	1	0.1	0.5167	1.382
Glycolysis or Gluconeogenesis	25	2	0.1522	0.6263	1.444
Sphingolipid metabolism	13	1	0.18	0.6263	1.283
Ascorbate and aldarate metabolism	14	3	0.2083	0.6263	1.343
Steroid biosynthesis	28	1	0.2222	0.6263	-1.261
Terpenoid backbone biosynthesis	24	1	0.2222	0.6263	-1.261
Alanine, aspartate and glutamate metabolism	21	2	0.2609	0.6739	1.147
Pyruvate metabolism	20	2	0.3478	0.7869	1.062
One carbon pool by folate	8	1	0.3889	0.7869	-1.115
Citrate cycle (TCA cycle)	20	3	0.5091	0.7869	-0.9942
Pentose and glucuronate interconversions	10	1	0.52	0.7869	1.023
Glyoxylate and dicarboxylate metabolism	17	3	0.5273	0.7869	-0.9528
Phenylalanine, tyrosine and tryptophan biosynthesis	22	1	0.537	0.7869	-1.018
Pentose phosphate pathway	17	1	0.64	0.7869	0.9869
Butanoate metabolism	20	1	0.64	0.7869	0.9565
Synthesis and degradation of ketone bodies	4	1	0.66	0.7869	0.8882
Glycine, serine and threonine metabolism	29	1	0.66	0.7869	0.9211
Cysteine and methionine metabolism	35	1	0.66	0.7869	0.8882
Valine, leucine and isoleucine degradation	34	1	0.66	0.7869	0.8882
Valine, leucine and isoleucine biosynthesis	26	1	0.66	0.7869	0.8882
Propanoate metabolism	14	1	0.66	0.7869	0.9211
Tyrosine metabolism	18	2	0.7895	0.9064	-0.7578
Glutathione metabolism	26	1	0.8333	0.9226	-0.8243
Glycerophospholipid metabolism	25	1	0.9	0.9621	0.7895
Carbon fixation in photosynthetic organisms	21	1	0.96	0.963	0.7402
Folate biosynthesis	16	1	0.963	0.963	-0.7274
