# Supplementary material for: Metabolome-based prediction of yield heterosis contributes to the breeding of elite rice
Source: Life Sci Alliance. 2019 Dec 13;3(1):e201900551. doi: 10.26508/lsa.201900551 (PMC6918511; doi:10.26508/lsa.201900551)
Supplement: Supplementary file 15 [file LSA-2019-00551_TableS15.xls]

## Sheet: S MetDNAPathway.enrichment.anal
Table S15 Dysregulated metabolic pathway analysis of high- and low-BPH-YPP hybrids from Pop2012.
Pathway name	p value	q value	FDR	Pathway length	Overlap
Butanoate metabolism;ath00650	0.000720204	0.0295098	0.0295098	42	5
Pantothenate and CoA biosynthesis;ath00770	0.00127146	0.0295098	0.0295098	28	4
Propanoate metabolism;ath00640	0.00133771	0.0295098	0.0295098	48	5
Glycine, serine and threonine metabolism;ath00260	0.00161152	0.0295098	0.0295098	50	5
Pyruvate metabolism;ath00620	0.0018788	0.0295098	0.0295098	31	4
Lysine degradation;ath00310	0.00192455	0.0295098	0.0295098	52	5
Synthesis and degradation of ketone bodies;ath00072	0.00432467	0.0541668	0.0541668	6	2
Citrate cycle (TCA cycle);ath00020	0.00471015	0.0541668	0.0541668	20	3
Valine, leucine and isoleucine biosynthesis;ath00290	0.00704959	0.0720625	0.0720625	23	3
Galactose metabolism;ath00052	0.00801504	0.0737383	0.0737383	46	4
Pentose and glucuronate interconversions;ath00040	0.0149073	0.11429	0.11429	55	4
Nicotinate and nicotinamide metabolism;ath00760	0.0149073	0.11429	0.11429	55	4
C5-Branched dibasic acid metabolism;ath00660	0.0176634	0.125002	0.125002	32	3
Glyoxylate and dicarboxylate metabolism;ath00630	0.0211091	0.129158	0.129158	61	4
Pentose phosphate pathway;ath00030	0.0224622	0.129158	0.129158	35	3
Phenylalanine, tyrosine and tryptophan biosynthesis;ath00400	0.0224622	0.129158	0.129158	35	3
Monobactam biosynthesis;ath00261	0.0298605	0.153856	0.153856	39	3
Tropane, piperidine and pyridine alkaloid biosynthesis;ath00960	0.0301022	0.153856	0.153856	68	4
Phenylalanine metabolism;ath00360	0.0361228	0.17491	0.17491	72	4
Cyanoamino acid metabolism;ath00460	0.043081	0.198173	0.198173	45	3
Tyrosine metabolism;ath00350	0.0463781	0.20318	0.20318	78	4
Fatty acid biosynthesis;ath00061	0.0559876	0.23413	0.23413	50	3
Biosynthesis of unsaturated fatty acids;ath01040	0.0674931	0.268144	0.268144	54	3
Sphingolipid metabolism;ath00600	0.0699506	0.268144	0.268144	25	2
Cutin, suberine and wax biosynthesis;ath00073	0.0800584	0.294615	0.294615	27	2
Alanine, aspartate and glutamate metabolism;ath00250	0.0852739	0.301738	0.301738	28	2
Cysteine and methionine metabolism;ath00270	0.0934262	0.318341	0.318341	62	3
beta-Alanine metabolism;ath00410	0.107095	0.330377	0.330377	32	2
Sulfur metabolism;ath00920	0.107095	0.330377	0.330377	32	2
Phenylpropanoid biosynthesis;ath00940	0.107732	0.330377	0.330377	66	3
Glycerolipid metabolism;ath00561	0.124336	0.368997	0.368997	35	2
Glucosinolate biosynthesis;ath00966	0.142753	0.410414	0.410414	75	3
Tryptophan metabolism;ath00380	0.167966	0.468268	0.468268	81	3
Ascorbate and aldarate metabolism;ath00053	0.198465	0.521679	0.521679	47	2
Indole alkaloid biosynthesis;ath00901	0.198465	0.521679	0.521679	47	2
Fructose and mannose metabolism;ath00051	0.243872	0.613468	0.613468	54	2
Oxidative phosphorylation;ath00190	0.246721	0.613468	0.613468	16	1
Carbon fixation in photosynthetic organisms;ath00710	0.334817	0.81061	0.81061	23	1
Linoleic acid metabolism;ath00591	0.391458	0.900354	0.900354	28	1
Vitamin B6 metabolism;ath00750	0.391458	0.900354	0.900354	28	1
Thiamine metabolism;ath00730	0.423138	0.949479	0.949479	31	1
Lysine biosynthesis;ath00300	0.462866	1	1	35	1
Ubiquinone and other terpenoid-quinone biosynthesis;ath00130	0.471447	1	1	90	2
Purine metabolism;ath00230	0.483044	1	1	92	2
Zeatin biosynthesis;ath00908	0.499901	1	1	39	1
Fatty acid elongation;ath00062	0.50876	1	1	40	1
Valine, leucine and isoleucine degradation;ath00280	0.526018	1	1	42	1
alpha-Linolenic acid metabolism;ath00592	0.526018	1	1	42	1
Histidine metabolism;ath00340	0.566597	1	1	47	1
Flavone and flavonol biosynthesis;ath00944	0.581854	1	1	49	1
Fatty acid degradation;ath00071	0.589283	1	1	50	1
Pyrimidine metabolism;ath00240	0.691926	1	1	66	1
Arginine and proline metabolism;ath00330	0.747392	1	1	77	1
Isoquinoline alkaloid biosynthesis;ath00950	0.810965	1	1	93	1
Amino sugar and nucleotide sugar metabolism;ath00520	0.856136	1	1	108	1
Glycolysis / Gluconeogenesis;ath00010	1	1	1	31	0
Steroid biosynthesis;ath00100	1	1	1	50	0
Photosynthesis;ath00195	1	1	1	11	0
Arginine biosynthesis;ath00220	1	1	1	23	0
Caffeine metabolism;ath00232	1	1	1	21	0
Taurine and hypotaurine metabolism;ath00430	1	1	1	22	0
Phosphonate and phosphinate metabolism;ath00440	1	1	1	57	0
Selenocompound metabolism;ath00450	1	1	1	27	0
Glutathione metabolism;ath00480	1	1	1	38	0
Starch and sucrose metabolism;ath00500	1	1	1	37	0
N-Glycan biosynthesis;ath00510	1	1	1	36	0
Glycosaminoglycan degradation;ath00531	1	1	1	27	0
Inositol phosphate metabolism;ath00562	1	1	1	44	0
Glycosylphosphatidylinositol (GPI)-anchor biosynthesis;ath00563	1	1	1	16	0
Glycerophospholipid metabolism;ath00564	1	1	1	52	0
Ether lipid metabolism;ath00565	1	1	1	25	0
Arachidonic acid metabolism;ath00590	1	1	1	75	0
Glycosphingolipid biosynthesis - lacto and neolacto series;ath00601	1	1	1	54	0
Glycosphingolipid biosynthesis - globo and isoglobo series;ath00603	1	1	1	23	0
Glycosphingolipid biosynthesis - ganglio series;ath00604	1	1	1	31	0
One carbon pool by folate;ath00670	1	1	1	9	0
Riboflavin metabolism;ath00740	1	1	1	20	0
Biotin metabolism;ath00780	1	1	1	28	0
Lipoic acid metabolism;ath00785	1	1	1	6	0
Folate biosynthesis;ath00790	1	1	1	41	0
Porphyrin and chlorophyll metabolism;ath00860	1	1	1	138	0
Terpenoid backbone biosynthesis;ath00900	1	1	1	45	0
Monoterpenoid biosynthesis;ath00902	1	1	1	55	0
Limonene and pinene degradation;ath00903	1	1	1	64	0
Diterpenoid biosynthesis;ath00904	1	1	1	103	0
Brassinosteroid biosynthesis;ath00905	1	1	1	29	0
Carotenoid biosynthesis;ath00906	1	1	1	115	0
Sesquiterpenoid and triterpenoid biosynthesis;ath00909	1	1	1	88	0
Nitrogen metabolism;ath00910	1	1	1	19	0
Flavonoid biosynthesis;ath00941	1	1	1	69	0
Anthocyanin biosynthesis;ath00942	1	1	1	66	0
Stilbenoid, diarylheptanoid and gingerol biosynthesis;ath00945	1	1	1	25	0
